# Supplementary material for: Using RNA-seq to characterize responses to 4-hydroxyphenylpyruvate dioxygenase (HPPD) inhibitor herbicide resistance in waterhemp (Amaranthus tuberculatus)
Source: BMC Plant Biol. 2019 May 6;19:182. doi: 10.1186/s12870-019-1795-x (PMC6501407; doi:10.1186/s12870-019-1795-x)
Supplement: Supplementary file 3 — Annotation of the waterhemp (Amaranthus tuberculatus) version 4 transcriptome. BLASTX [26] was used to compare waterhemp transcriptome sequences against the Uniref100 (version 01/22/2016, [31]) nonredundant protein database. (XLSX 919 kb) [file 12870_2019_1795_MOESM3_ESM.xlsx]

## Sheet: DET Expression
Additional file 4. Identification of waterhemp (Amaranthus tuberculatus) transcripts significantly (FDR < 0.05) differentially expressed in response to mesotrione treatment. edgeR was used to identify differentially expressed transcripts (DETs) responding to herbicide treatment relative to mock-treated controls within each genotype (herbicide resistant (R) and susceptible(S)) and at specific time…
Waterhemp transcriptome ID (version 4)	Top A. thaliana BLASTX HIT (TAIRv10)	logFC R	logFC R3	logFC R6	logFC R12	logFC R24	logFC S	logFC S3	logFC S6	logFC S12	logFC S24	FDR R	FDR R3	FDR R6	FDR R12	FDR R24	FDR S	FDR S3	FDR S6	FDR S12	FDR S24
TR728|c2_g2_i5	AT1G23900.2 | Symbols: GAMMA-ADAPTIN 1 | gamma-adaptin 1 | chr1:8441379-8447152 FORWARD LENGTH=876	0.409	0.0304	-0.096	-0.202	0.676	-0.258	-0.708	0.12	-0.923	1.25	0.798	1	0.985	1	0.25	0.928	0.363	1	0.244	0.0172
TR728|c2_g3_i1	AT1G60070.1 | Symbols: | Adaptor protein complex AP-1, gamma subunit | chr1:22142944-22149296 REVERSE LENGTH=862	-2.61	-0.383	-0.683	-0.359	-1.18	-0.749	-0.396	0.00151	-0.0741	-0.28	0.0126	1	0.627	1	0.0765	0.714	0.811	1	1	0.891
TR730|c1_g3_i5	AT1G33360.1 | Symbols: | ATP-dependent Clp protease | chr1:12092111-12095789 FORWARD LENGTH=656	-0.577	0.00849	-0.012	0.311	-0.885	-0.145	-0.195	0.238	0.00928	-0.197	0.55	1	1	0.973	0.0286	0.949	0.886	1	1	0.884
TR733|c0_g2_i3	AT1G56070.1 | Symbols: LOS1 | Ribosomal protein S5/Elongation factor G/III/V family protein | chr1:20968245-20971077 REVERSE LENGTH=843	-1.61	-0.0161	-0.301	-0.206	-1.09	0.00161	-0.222	0.213	0.0764	-0.0665	0.0727	1	0.883	1	0.0107	1	0.911	1	1	0.981
TR742|c3_g1_i4	AT5G23870.1 | Symbols: | Pectinacetylesterase family protein | chr5:8046309-8049999 REVERSE LENGTH=415	-0.999	-0.901	0.0388	-0.203	0.066	-2.2	-0.941	-0.737	-0.0805	-0.438	0.385	0.369	0.999	1	0.944	0.0164	0.14	0.64	1	0.715
TR770|c0_g1_i12	AT1G56430.1 | Symbols: ATNAS4, NAS4 | nicotianamine synthase 4 | chr1:21137023-21137997 FORWARD LENGTH=324	-2.21	0.118	0.0985	-0.803	-1.62	-2.38	-0.303	-0.635	-0.62	-0.826	0.142	1	0.993	0.834	0.0257	0.172	0.935	0.999	0.983	0.591
TR770|c0_g1_i15	AT1G56430.1 | Symbols: ATNAS4, NAS4 | nicotianamine synthase 4 | chr1:21137023-21137997 FORWARD LENGTH=324	-2.45	0.495	-0.266	-0.529	-2.15	-0.251	0.584	0.0108	-0.807	-0.0385	0.237	1	0.972	1	0.0295	0.973	0.873	1	0.978	1
TR770|c0_g1_i17	AT1G56430.1 | Symbols: ATNAS4, NAS4 | nicotianamine synthase 4 | chr1:21137023-21137997 FORWARD LENGTH=324	-1.2	0.289	0.511	-0.481	-1.52	-0.976	-0.387	-0.566	-0.172	0.148	0.541	1	0.878	1	0.046	0.748	0.909	1	1	0.973
TR770|c0_g1_i2	AT1G09240.1 | Symbols: NAS3, ATNAS3 | nicotianamine synthase 3 | chr1:2984950-2985912 FORWARD LENGTH=320	0.263	1.27	0.744	0.266	-2.01	-2.74	-1.31	-0.302	-0.593	-0.531	0.946	0.54	0.8	1	0.0176	0.202	0.404	1	1	0.851
TR770|c0_g1_i3	AT1G56430.1 | Symbols: ATNAS4, NAS4 | nicotianamine synthase 4 | chr1:21137023-21137997 FORWARD LENGTH=324	-1.76	0.595	0.174	-0.664	-1.86	-1.41	-0.338	0.145	-0.682	-0.533	0.328	1	0.98	0.983	0.0229	0.592	0.928	1	0.972	0.832
TR793|c1_g1_i2	AT3G50000.1 | Symbols: CKA2, ATCKA2 | casein kinase II, alpha chain 2 | chr3:18534487-18536743 FORWARD LENGTH=403	-0.548	0.122	0.306	-0.0591	-0.917	-0.175	-0.0504	0.0436	-0.168	0.000497	0.633	1	0.856	1	0.0433	0.944	0.988	1	1	1
TR807|c1_g1_i2	AT3G47090.1 | Symbols: | Leucine-rich repeat protein kinase family protein | chr3:17341512-17344645 REVERSE LENGTH=1009	6.76	1.68	1.23	1.86	1.99	4.27	0.881	0.642	1.79	0.96	0.000307	0.47	0.641	0.396	0.187	0.0258	0.743	1	0.316	0.74
TR807|c1_g1_i3	AT3G47090.1 | Symbols: | Leucine-rich repeat protein kinase family protein | chr3:17341512-17344645 REVERSE LENGTH=1009	4.97	1.49	0.321	1.11	2.04	4.91	1.17	0.419	1.46	1.85	0.00992	0.593	0.959	0.839	0.147	0.00317	0.501	1	0.456	0.229
TR813|c0_g4_i1	AT3G06720.2 | Symbols: AT-IMP, ATKAP ALPHA, AIMP ALPHA | importin alpha isoform 1 | chr3:2120559-2123555 FORWARD LENGTH=532	-2.77	-0.263	-0.618	-0.161	-1.73	-1.43	-0.597	0.14	-0.393	-0.579	0.000338	1	0.548	1	0.000185	0.198	0.438	1	0.977	0.54
TR824|c0_g1_i1	AT5G15020.2 | Symbols: SNL2 | SIN3-like 2 | chr5:4859408-4865569 REVERSE LENGTH=1355	-1.18	-0.268	-0.263	0.076	-0.721	-0.271	-0.0934	0.152	-0.211	-0.118	0.119	1	0.865	1	0.0486	0.883	0.966	1	1	0.945
TR827|c1_g6_i2	AT4G16230.1 | Symbols: | GDSL-like Lipase/Acylhydrolase superfamily protein | chr4:9185298-9186447 FORWARD LENGTH=251	8.06	1.95	-0.706	4.28	2.53	-1.78	3.34	-5.8	2.78	-2.1	0.0332	0.948	0.957	0.268	0.256	1	0.583	0.211	0.788	0.832
TR831|c1_g1_i3	AT2G35320.1 | Symbols: ATEYA, EYA | EYES ABSENT homolog | chr2:14867074-14868387 REVERSE LENGTH=307	1.7	0.728	-0.00683	-0.191	1.17	-0.379	0.15	-0.513	-0.361	0.345	0.14	0.759	1	1	0.0498	0.891	0.962	0.956	1	0.859
TR838|c1_g1_i11	No informative hit E<10-6	-0.543	-0.22	0.381	0.629	-1.33	-0.448	-0.571	-0.745	1.36	-0.497	0.825	1	0.944	0.942	0.0429	0.915	0.84	1	0.172	0.8
TR842|c0_g2_i1	AT1G56720.3 | Symbols: | Protein kinase superfamily protein | chr1:21263630-21265559 REVERSE LENGTH=492	-4.6	-1.23	-1.09	-0.958	-1.32	-0.225	0.268	0.785	-0.185	-1.09	0.0275	0.814	0.77	0.952	0.358	0.983	0.967	1	1	0.725
TR850|c2_g2_i1	No informative hit E<10-6	-3.12	-0.174	-0.936	-0.397	-1.61	-1.9	-0.494	0.0756	-0.427	-1.05	0.00598	1	0.432	1	0.0266	0.166	0.752	1	1	0.206
TR860|c1_g2_i1	AT5G06130.2 | Symbols: | chaperone protein dnaJ-related | chr5:1853754-1855763 REVERSE LENGTH=315	1.76	-0.0119	0.63	0.495	0.643	0.877	0.249	0.589	-0.236	0.275	0.024	1	0.462	0.76	0.149	0.481	0.869	0.64	1	0.835
TR860|c1_g2_i5	AT5G06130.2 | Symbols: | chaperone protein dnaJ-related | chr5:1853754-1855763 REVERSE LENGTH=315	1.93	0.731	0.199	0.411	0.591	0.967	0.162	0.17	0.104	0.531	0.00867	0.414	0.931	0.873	0.202	0.405	0.936	1	1	0.491
TR879|c0_g1_i2	AT3G44820.1 | Symbols: | Phototropic-responsive NPH3 family protein | chr3:16361864-16364411 REVERSE LENGTH=651	0.16	0.0498	-0.0434	-0.393	0.546	0.99	2.09	0.349	-0.177	-1.28	0.985	1	1	1	0.744	0.815	0.0433	1	1	0.464
TR885|c0_g1_i2	AT5G44210.1 | Symbols: ERF9, ATERF9, ATERF-9 | erf domain protein 9 | chr5:17806742-17807344 FORWARD LENGTH=200	1.39	-0.235	0.753	-0.198	1.07	0.0143	1.12	-0.208	-0.313	-0.587	0.203	1	0.536	1	0.0217	1	0.0286	1	1	0.491
TR885|c0_g1_i4	AT5G44210.1 | Symbols: ERF9, ATERF9, ATERF-9 | erf domain protein 9 | chr5:17806742-17807344 FORWARD LENGTH=200	0.47	-0.336	0.761	-0.00925	0.0544	0.96	1.91	-0.0244	-0.66	-0.261	0.883	1	0.853	1	0.979	0.79	0.0322	1	0.99	0.936
TR895|c1_g1_i1	AT3G05170.1 | Symbols: | Phosphoglycerate mutase family protein | chr3:1466738-1468219 FORWARD LENGTH=316	-2.95	-0.804	0.132	0.212	-2.49	-1.69	-0.647	0.271	-0.831	-0.485	0.117	0.969	0.989	1	0.0179	0.577	0.808	1	0.964	0.907
TR907|c0_g2_i1	AT4G10630.1 | Symbols: | Glutaredoxin family protein | chr4:6566625-6567629 REVERSE LENGTH=334	0.456	0.375	-0.288	-0.515	0.884	-2.74	0.265	-0.454	-0.744	-1.8	0.867	1	0.954	1	0.361	0.0552	0.932	1	0.868	0.0344
TR918|c2_g1_i2	AT2G46420.2 | Symbols: | Plant protein 1589 of unknown function | chr2:19054891-19056645 FORWARD LENGTH=345	-1.28	0.137	-0.109	-0.0723	-1.24	-0.606	-0.127	-0.0739	0.0336	-0.438	0.153	1	0.974	1	0.0082	0.68	0.951	1	1	0.646
TR936|c3_g1_i4	No informative hit E<10-6	-4.77	-0.265	0.476	0.858	-5.84	-1.04	-1.43	-2.33	2.11	0.606	0.285	1	0.966	1	0.0428	0.899	0.68	0.553	0.717	0.915
TR940|c4_g1_i2	AT4G29960.1 | Symbols: | unknown protein; FUNCTIONS IN: molecular_function unknown; INVOLVED IN: biological_process unknown; LOCATED IN: plasma membrane; EXPRESSED IN: 23 plant structures; EXPRESSED DURING: 15 growth stages; Has 30201 Blast hits to 17322 proteins in 780 species: Archae - 12; Bacteria - 1396; Metazoa - 17338; Fungi - 3422; Plants - 5037; Viruses - 0; Other Eukaryotes - 2996 (sourc…	-4.02	-0.984	0.609	-0.416	-3.23	1.41	0.388	0.0459	0.409	0.568	0.0321	0.871	0.876	1	0.00326	0.641	0.918	1	1	0.859
TR944|c2_g4_i2	AT4G05000.2 | Symbols: VPS28-1 | Vacuolar protein sorting-associated protein VPS28 family protein | chr4:2563953-2564585 FORWARD LENGTH=210	0.699	-0.00814	0.0921	-0.224	0.839	0.00311	0.373	-0.0888	-0.247	-0.034	0.455	1	0.979	1	0.0198	1	0.693	1	1	0.992
TR951|c0_g2_i3	AT1G70890.1 | Symbols: MLP43 | MLP-like protein 43 | chr1:26725912-26726489 REVERSE LENGTH=158	1.14	-0.227	0.127	0.0808	1.15	-0.257	0.314	-0.7	-0.0998	0.229	0.363	1	0.979	1	0.0245	0.936	0.877	0.765	1	0.914
TR958|c4_g2_i1	AT4G37850.1 | Symbols: | basic helix-loop-helix (bHLH) DNA-binding superfamily protein | chr4:17796362-17797647 REVERSE LENGTH=328	0.0544	0.353	0.363	-0.295	-0.367	-1.74	-1.75	0.839	0.379	-1.2	1	1	0.94	1	0.733	0.517	0.0336	0.918	1	0.275
TR959|c0_g2_i1	AT2G02390.1 | Symbols: ATGSTZ1, GST18, GSTZ1 | glutathione S-transferase zeta 1 | chr2:629015-630955 FORWARD LENGTH=221	6.7	2.77	2.55	1.9	-0.519	5.4	1.33	1.35	1.8	0.916	0.000422	0.0512	0.124	0.463	0.755	0.00767	0.568	0.842	0.501	0.768
TR959|c0_g2_i2	AT2G02390.1 | Symbols: ATGSTZ1, GST18, GSTZ1 | glutathione S-transferase zeta 1 | chr2:629015-630955 FORWARD LENGTH=221	6.49	1.45	2.98	2.51	-0.447	4.43	1.21	1.14	0.834	1.25	0.00554	0.878	0.123	0.319	0.828	0.13	0.729	0.995	1	0.681
TR959|c0_g2_i3	AT2G02390.1 | Symbols: ATGSTZ1, GST18, GSTZ1 | glutathione S-transferase zeta 1 | chr2:629015-630955 FORWARD LENGTH=221	6.05	2.69	1.93	1.5	-0.0598	5.96	1.6	1.25	2.64	0.468	0.000209	0.0157	0.223	0.571	0.98	0.000138	0.266	0.792	0.0263	0.896
TR959|c0_g2_i4	AT2G02390.1 | Symbols: ATGSTZ1, GST18, GSTZ1 | glutathione S-transferase zeta 1 | chr2:629015-630955 FORWARD LENGTH=221	6.12	1.67	2.72	2.63	-0.901	5.15	1.01	1.51	1.39	1.24	0.00911	0.741	0.174	0.244	0.6	0.045	0.791	0.86	0.878	0.685
TR966|c1_g1_i3	AT4G29530.1 | Symbols: | Pyridoxal phosphate phosphatase-related protein | chr4:14496164-14497310 FORWARD LENGTH=245	-4.69	-1.08	-0.998	-2.62	0.0126	2.39	-0.372	0.252	0.774	1.74	0.0275	0.985	0.768	0.0455	1	0.477	0.946	1	1	0.372
TR970|c1_g1_i5	AT1G47670.1 | Symbols: | Transmembrane amino acid transporter family protein | chr1:17536834-17539486 REVERSE LENGTH=519	5.49	1	1.1	1.75	1.63	1.33	-0.765	0.276	0.455	1.37	0.0353	1	0.834	0.631	0.315	0.796	0.88	1	1	0.555
TR970|c1_g1_i6	AT1G47670.1 | Symbols: | Transmembrane amino acid transporter family protein | chr1:17536834-17539486 REVERSE LENGTH=519	4.39	2.57	-0.0627	0.858	1.03	4.38	2.25	0.637	0.533	0.959	0.0706	0.376	1	1	0.466	0.0336	0.177	1	1	0.672
TR976|c2_g3_i1	AT2G38610.2 | Symbols: | RNA-binding KH domain-containing protein | chr2:16147552-16149638 REVERSE LENGTH=286	-1.01	-0.0443	-0.248	0.301	-1.02	-0.0428	-0.118	0.0718	0.174	-0.17	0.275	1	0.9	1	0.0173	0.997	0.958	1	1	0.921
TR979|c0_g1_i2	AT3G24120.2 | Symbols: | Homeodomain-like superfamily protein | chr3:8705925-8708148 REVERSE LENGTH=298	-1.93	-0.214	-0.0169	-0.107	-1.59	-1.87	-0.814	0.00173	-0.196	-0.86	0.132	1	1	1	0.0097	0.194	0.438	1	1	0.391
TR984|c0_g1_i2	AT1G10380.1 | Symbols: | Putative membrane lipoprotein | chr1:3400706-3402110 FORWARD LENGTH=305	-2.05	0.0161	-0.407	-0.562	-1.1	-0.787	-0.0491	0.634	-0.697	-0.675	0.0448	1	0.856	0.831	0.0348	0.691	0.993	0.863	0.674	0.483
TR986|c0_g2_i2	AT5G23740.1 | Symbols: RPS11-BETA | ribosomal protein S11-beta | chr5:8008251-8009330 REVERSE LENGTH=159	0.197	0.32	-0.714	-0.779	1.37	2.06	0.831	0.117	0.656	0.454	0.951	1	0.728	0.831	0.0387	0.217	0.529	1	0.942	0.83
TR987|c0_g2_i1	AT1G52190.1 | Symbols: | Major facilitator superfamily protein | chr1:19434671-19438673 FORWARD LENGTH=607	1.58	0.233	0.935	0.84	-0.432	-2.22	0.28	-0.488	-0.00547	-2.01	0.235	1	0.414	0.706	0.618	0.056	0.9	1	1	9.89e-06
TR987|c0_g2_i2	AT1G52190.1 | Symbols: | Major facilitator superfamily protein | chr1:19434671-19438673 FORWARD LENGTH=607	2.1	0.308	1.02	0.548	0.223	-3.63	-0.0078	-0.768	-0.765	-2.09	0.104	1	0.413	0.994	0.832	0.00026	1	0.829	0.79	4.53e-05
TR987|c0_g2_i3	AT1G52190.1 | Symbols: | Major facilitator superfamily protein | chr1:19434671-19438673 FORWARD LENGTH=607	1.35	0.177	0.888	0.438	-0.152	-2.86	0.159	-0.738	-0.113	-2.17	0.384	1	0.556	1	0.896	0.0193	0.966	0.894	1	6.78e-05
TR987|c0_g2_i4	AT1G52190.1 | Symbols: | Major facilitator superfamily protein | chr1:19434671-19438673 FORWARD LENGTH=607	1.26	0.173	0.619	0.489	-0.0248	-2.18	0.414	-0.492	-0.0199	-2.08	0.358	1	0.724	1	0.988	0.06	0.806	1	1	3.22e-06
TR995|c3_g1_i2	AT4G20930.1 | Symbols: | 6-phosphogluconate dehydrogenase family protein | chr4:11198627-11201036 REVERSE LENGTH=347	2.81	0.578	-0.385	1.01	1.61	-0.554	-0.0969	-0.305	-0.267	0.115	0.0401	1	0.9	0.337	0.0673	0.86	0.984	1	1	0.982
TR995|c3_g1_i5	AT4G20930.1 | Symbols: | 6-phosphogluconate dehydrogenase family protein | chr4:11198627-11201036 REVERSE LENGTH=347	2.36	0.709	0.235	0.652	0.76	-0.555	-0.483	0.0669	0.0166	-0.156	0.0237	0.818	0.94	0.63	0.305	0.801	0.716	1	1	0.958
TR995|c3_g1_i9	AT4G20930.1 | Symbols: | 6-phosphogluconate dehydrogenase family protein | chr4:11198627-11201036 REVERSE LENGTH=347	2.38	0.628	0.127	0.496	1.12	-1.26	-0.506	-0.0577	-0.174	-0.522	0.0367	0.945	0.979	0.865	0.147	0.423	0.724	1	1	0.753
TR1027|c2_g2_i4	ATMG00860.1 | Symbols: ORF158 | DNA/RNA polymerases superfamily protein | chrM:235916-236392 FORWARD LENGTH=158	-8.13	-5.04	-1.85	0.427	-1.66	-3.63	-0.492	0.422	-4.31	0.749	0.0428	0.0771	0.83	1	0.476	0.607	0.968	1	0.236	0.938
TR1094|c2_g1_i2	AT1G21600.2 | Symbols: PTAC6 | plastid transcriptionally active 6 | chr1:7571514-7573782 REVERSE LENGTH=328	0.939	0.278	0.152	-0.117	0.626	1.68	0.334	0.472	0.634	0.245	0.319	1	0.957	1	0.156	0.0371	0.781	0.877	0.517	0.861
TR1095|c1_g1_i14	AT5G20380.1 | Symbols: PHT4;5 | phosphate transporter 4;5 | chr5:6887936-6892358 REVERSE LENGTH=517	0.116	0.134	-0.2	0.0103	0.172	2.01	1.05	0.231	0.353	0.377	0.959	1	0.949	1	0.79	0.012	0.0115	1	0.992	0.711
TR1095|c1_g1_i15	AT5G20380.1 | Symbols: PHT4;5 | phosphate transporter 4;5 | chr5:6887936-6892358 REVERSE LENGTH=517	0.88	0.293	0.0995	0.3	0.187	1.75	0.587	0.434	0.534	0.193	0.407	1	0.983	1	0.753	0.0345	0.375	0.964	0.788	0.892
TR1095|c1_g1_i7	AT5G20380.1 | Symbols: PHT4;5 | phosphate transporter 4;5 | chr5:6887936-6892358 REVERSE LENGTH=517	1.46	-0.141	0.309	0.587	0.706	2.47	1.01	0.562	0.621	0.276	0.276	1	0.931	0.953	0.269	0.0313	0.205	0.983	0.903	0.894
TR1102|c0_g1_i3	AT1G08590.1 | Symbols: | Leucine-rich receptor-like protein kinase family protein | chr1:2718859-2721948 FORWARD LENGTH=1029	-1.86	0.338	-0.394	-1.16	-0.643	-3.51	-1.47	-0.402	-0.349	-1.29	0.429	1	0.955	0.666	0.643	0.0368	0.205	1	1	0.402
TR1111|c1_g1_i2	AT4G21440.1 | Symbols: ATMYB102, ATM4, MYB102 | MYB-like 102 | chr4:11418425-11419652 REVERSE LENGTH=350	-3.92	-2.44	-0.67	0.379	-1.19	0.243	0.168	-0.337	0.292	0.121	0.0411	0.047	0.88	1	0.304	0.976	0.982	1	1	0.988
TR1113|c0_g3_i1	AT1G80440.1 | Symbols: | Galactose oxidase/kelch repeat superfamily protein | chr1:30241763-30242827 FORWARD LENGTH=354	2.61	0.643	-0.0563	0.959	1.06	1.88	0.67	0.156	-0.26	1.31	0.000441	0.724	0.993	0.152	0.00997	0.0382	0.432	1	1	0.00115
TR1113|c0_g3_i2	AT1G80440.1 | Symbols: | Galactose oxidase/kelch repeat superfamily protein | chr1:30241763-30242827 FORWARD LENGTH=354	2.07	0.306	-0.186	1.09	0.862	1.04	0.000935	-0.00452	-0.25	1.29	0.00898	1	0.945	0.0411	0.04	0.439	1	1	1	0.00104
TR1114|c0_g3_i3	AT5G27390.1 | Symbols: | Mog1/PsbP/DUF1795-like photosystem II reaction center PsbP family protein | chr5:9674634-9676118 REVERSE LENGTH=241	-0.393	0.0911	0.171	0.289	-0.945	1.1	0.136	0.56	0.166	0.234	0.733	1	0.944	1	0.00927	0.264	0.945	0.639	1	0.853
TR1148|c1_g2_i4	AT2G16760.1 | Symbols: | Calcium-dependent phosphotriesterase superfamily protein | chr2:7275739-7277122 FORWARD LENGTH=327	-0.82	-0.00144	-0.137	0.19	-0.872	-4.17	-0.34	-0.87	-0.322	-2.64	0.666	1	0.984	1	0.242	5.54e-05	0.899	0.754	1	4.89e-07
TR1148|c1_g2_i5	AT2G16760.1 | Symbols: | Calcium-dependent phosphotriesterase superfamily protein | chr2:7275739-7277122 FORWARD LENGTH=327	-1.24	-0.133	-0.08	0.245	-1.27	-4.43	-0.606	-1.12	0.075	-2.78	0.504	1	0.995	1	0.101	6.49e-05	0.735	0.537	1	7.02e-07
TR1161|c1_g1_i3	AT2G01590.1 | Symbols: CRR3 | chlororespiratory reduction 3 | chr2:266675-267379 FORWARD LENGTH=174	0.16	0.0446	-0.247	-0.595	0.956	-0.047	-0.534	0.0719	-0.0418	0.457	0.938	1	0.925	0.724	0.0352	0.998	0.598	1	1	0.67
TR1161|c1_g1_i5	AT2G01590.1 | Symbols: CRR3 | chlororespiratory reduction 3 | chr2:266675-267379 FORWARD LENGTH=174	0.674	-0.0649	0.129	-0.712	1.32	-0.696	-0.679	-0.0608	-0.249	0.293	0.643	1	0.978	0.674	0.00725	0.734	0.496	1	1	0.873
TR1172|c1_g1_i7	AT1G05870.4 | Symbols: | Protein of unknown function (DUF1685) | chr1:1772454-1773228 REVERSE LENGTH=189	1.2	0.166	0.238	0.0661	0.729	-0.0693	0.113	-0.188	0.0531	-0.0476	0.0966	1	0.888	1	0.0326	0.984	0.955	1	1	0.984
TR1184|c2_g1_i5	AT5G53970.1 | Symbols: | Tyrosine transaminase family protein | chr5:21910676-21912594 FORWARD LENGTH=414	1.08	-0.0424	0.422	0.586	0.111	2.87	0.513	0.938	0.507	0.912	0.565	1	0.912	1	0.932	0.0486	0.826	0.806	1	0.466
TR1189|c4_g4_i1	No informative hit E<10-6	-1.77	0	0.824	-0.27	-2.32	-26.6	-13.5	-0.565	0	-12.5	1	1	0.979	1	0.661	1	0.0105	1	1	0.0223
TR1191|c2_g2_i2	AT4G18710.1 | Symbols: BIN2, DWF12, UCU1, ATSK21, SK21 | Protein kinase superfamily protein | chr4:10296474-10298913 FORWARD LENGTH=380	-1.62	-0.292	-0.345	-0.12	-0.86	-0.155	-0.09	-0.0241	-0.108	0.0669	0.0531	1	0.835	1	0.043	0.956	0.974	1	1	0.98
TR1196|c2_g3_i3	No informative hit E<10-6	9.13	1.57	2.75	2.61	2.19	3.7	0.587	0.929	1.38	0.804	0.0263	1	0.647	0.826	0.389	0.579	0.958	1	1	0.925
TR1200|c1_g1_i8	AT5G25220.1 | Symbols: KNAT3 | KNOTTED1-like homeobox gene 3 | chr5:8736208-8738115 FORWARD LENGTH=431	-0.893	-0.0848	-0.225	0.0438	-0.627	-0.854	-0.0753	-0.144	-0.425	-0.211	0.193	1	0.873	1	0.0487	0.314	0.97	1	0.661	0.835
TR1201|c3_g3_i2	AT3G57030.1 | Symbols: | Calcium-dependent phosphotriesterase superfamily protein | chr3:21101653-21103204 REVERSE LENGTH=374	1.05	0.072	0.224	-0.308	1.07	2.02	0.656	0.345	0.489	0.527	0.419	1	0.95	1	0.0428	0.0809	0.546	1	0.96	0.671
TR1203|c1_g2_i1	AT4G02520.1 | Symbols: ATGSTF2, ATPM24.1, ATPM24, GST2, GSTF2 | glutathione S-transferase PHI 2 | chr4:1110673-1111531 REVERSE LENGTH=212	1.22	0.248	0.366	0.375	0.231	3.62	1.36	0.94	0.465	0.853	0.396	1	0.902	1	0.798	0.000193	0.034	0.578	1	0.393
TR1203|c1_g2_i5	AT4G02520.1 | Symbols: ATGSTF2, ATPM24.1, ATPM24, GST2, GSTF2 | glutathione S-transferase PHI 2 | chr4:1110673-1111531 REVERSE LENGTH=212	1.26	0.97	0.0595	1.07	-0.845	4.63	1.56	1.19	0.239	1.64	0.668	0.97	1	0.918	0.512	0.0219	0.345	0.894	1	0.34
TR1203|c1_g2_i6	AT4G02520.1 | Symbols: ATGSTF2, ATPM24.1, ATPM24, GST2, GSTF2 | glutathione S-transferase PHI 2 | chr4:1110673-1111531 REVERSE LENGTH=212	1.77	0.522	0.495	0.489	0.266	4.03	1.59	0.978	0.563	0.894	0.197	1	0.848	1	0.777	6.49e-05	0.0118	0.595	0.975	0.403
TR1218|c1_g2_i5	AT4G02340.1 | Symbols: | alpha/beta-Hydrolases superfamily protein | chr4:1035722-1037403 FORWARD LENGTH=324	-3	-0.481	-0.743	-0.737	-1.04	-2.26	-0.272	-0.0296	-1.03	-0.924	0.0157	1	0.663	0.886	0.197	0.127	0.925	1	0.568	0.435
TR1218|c1_g2_i6	AT4G02340.1 | Symbols: | alpha/beta-Hydrolases superfamily protein | chr4:1035722-1037403 FORWARD LENGTH=324	-7.91	-0.847	-0.747	-1.96	-4.35	1.84	-0.548	-0.605	-0.351	3.34	0.0266	1	0.94	0.914	0.0548	0.802	0.949	1	1	0.361
TR1235|c1_g2_i3	No informative hit E<10-6	-2.33	-0.682	-0.84	-0.627	-0.184	-0.144	-0.0938	-0.0447	0.115	-0.121	0.0305	0.797	0.495	0.838	0.851	0.972	0.979	1	1	0.967
TR1236|c2_g1_i1	AT3G10960.1 | Symbols: ATAZG1, AZG1 | AZA-guanine resistant1 | chr3:3424986-3426725 REVERSE LENGTH=579	-1.61	0.0697	0.0359	-0.574	-1.14	-0.961	-0.205	-0.19	-0.279	-0.288	0.15	1	1	0.848	0.0257	0.587	0.94	1	1	0.875
TR1242|c0_g1_i8	AT2G45290.1 | Symbols: | Transketolase | chr2:18672737-18675589 FORWARD LENGTH=741	-0.981	0.0706	-0.326	0.105	-0.83	-0.541	-0.195	0.0626	-0.111	-0.298	0.287	1	0.837	1	0.0432	0.732	0.914	1	1	0.803
TR1243|c1_g1_i1	AT1G53710.1 | Symbols: | Calcineurin-like metallo-phosphoesterase superfamily protein | chr1:20053339-20056271 REVERSE LENGTH=528	2.03	0.0464	0.279	-0.189	1.89	0.954	0.0458	-0.59	0.601	0.897	0.211	1	0.958	1	0.00975	0.753	0.997	1	0.989	0.56
TR1246|c2_g1_i5	AT1G72160.1 | Symbols: | Sec14p-like phosphatidylinositol transfer family protein | chr1:27153823-27155609 REVERSE LENGTH=490	-1.61	0.0488	-0.0679	-1.03	-0.564	-2.48	-0.968	-0.000118	-1.18	-0.335	0.154	1	0.994	0.254	0.384	0.0111	0.166	1	0.119	0.85
TR1246|c2_g1_i6	AT1G72160.1 | Symbols: | Sec14p-like phosphatidylinositol transfer family protein | chr1:27153823-27155609 REVERSE LENGTH=490	-1.02	-0.00426	0.114	-0.741	-0.385	-1.41	-1.03	0.174	-0.153	-0.394	0.273	1	0.974	0.34	0.437	0.139	0.0106	1	1	0.689
TR1251|c0_g1_i1	AT1G13130.1 | Symbols: | Cellulase (glycosyl hydrolase family 5) protein | chr1:4474726-4477820 FORWARD LENGTH=552	0.893	-0.112	-0.0319	-0.247	1.28	0.877	0.526	0.202	0.138	0.0111	0.459	1	1	1	0.00353	0.595	0.639	1	1	1
TR1251|c0_g1_i4	AT1G13130.1 | Symbols: | Cellulase (glycosyl hydrolase family 5) protein | chr1:4474726-4477820 FORWARD LENGTH=552	0.981	-0.0691	-0.0253	-0.253	1.33	1.02	0.607	0.346	0.0428	0.0231	0.415	1	1	1	0.00317	0.519	0.551	1	1	0.999
TR1252|c2_g3_i1	AT2G20330.1 | Symbols: | Transducin/WD40 repeat-like superfamily protein | chr2:8772888-8775518 REVERSE LENGTH=648	-4.42	-1.2	-0.739	-0.1	-2.38	0.555	0.176	0.484	0.488	-0.593	0.0413	0.83	0.866	1	0.0939	0.937	0.982	1	1	0.905
TR1254|c4_g3_i4	AT1G13560.1 | Symbols: AAPT1, ATAAPT1 | aminoalcoholphosphotransferase 1 | chr1:4638834-4641691 REVERSE LENGTH=389	-1.28	-0.0375	-0.0313	-0.127	-1.08	-0.812	-0.0972	-0.0764	-0.169	-0.47	0.16	1	0.999	1	0.0168	0.537	0.97	1	1	0.585
TR1266|c0_g1_i2	AT3G47780.1 | Symbols: ATATH6, ATH6 | ABC2 homolog 6 | chr3:17624500-17628972 FORWARD LENGTH=935	3.39	1.23	1.28	0.762	0.122	1.38	1.24	0.171	0.155	-0.188	5.75e-05	0.0256	0.0638	0.639	0.896	0.314	0.0115	1	1	0.935
TR1266|c0_g1_i4	AT3G47780.1 | Symbols: ATATH6, ATH6 | ABC2 homolog 6 | chr3:17624500-17628972 FORWARD LENGTH=935	3.5	1.51	1.1	0.883	0.013	1.46	1.43	0.00286	0.332	-0.306	0.00014	0.00431	0.223	0.536	0.996	0.326	0.00462	1	1	0.874
TR1266|c0_g1_i6	AT3G47780.1 | Symbols: ATATH6, ATH6 | ABC2 homolog 6 | chr3:17624500-17628972 FORWARD LENGTH=935	4.07	1.51	0.984	0.928	0.648	1.89	1.59	0.263	0.0993	-0.066	6.72e-05	0.0255	0.456	0.651	0.393	0.229	0.00742	1	1	0.99
TR1271|c3_g1_i1	AT5G50150.1 | Symbols: | Protein of Unknown Function (DUF239) | chr5:20402444-20406375 REVERSE LENGTH=420	-1.91	-0.173	-0.636	-0.311	-0.786	-0.335	0.0703	0.276	-0.262	-0.42	0.00755	1	0.424	1	0.0487	0.858	0.98	1	1	0.621
TR1271|c3_g1_i2	AT5G50150.1 | Symbols: | Protein of Unknown Function (DUF239) | chr5:20402444-20406375 REVERSE LENGTH=420	-2.22	-0.354	-0.576	-0.468	-0.82	-0.337	0.144	0.286	-0.225	-0.543	0.000257	0.963	0.449	0.709	0.0257	0.839	0.936	1	1	0.349
TR1271|c3_g3_i1	AT5G50150.1 | Symbols: | Protein of Unknown Function (DUF239) | chr5:20402444-20406375 REVERSE LENGTH=420	-1.68	-0.112	-0.46	-0.491	-0.616	-0.614	-0.0952	0.215	-0.346	-0.388	0.0392	1	0.722	0.802	0.179	0.694	0.971	1	0.989	0.708
TR1271|c3_g3_i2	AT5G50150.1 | Symbols: | Protein of Unknown Function (DUF239) | chr5:20402444-20406375 REVERSE LENGTH=420	-1.5	-0.0737	-0.178	-0.398	-0.851	-0.116	0.241	0.373	-0.28	-0.449	0.0629	1	0.947	0.92	0.0386	0.969	0.872	0.989	1	0.585
TR1271|c3_g3_i3	AT5G50150.1 | Symbols: | Protein of Unknown Function (DUF239) | chr5:20402444-20406375 REVERSE LENGTH=420	-2.19	-0.111	-0.411	-0.583	-1.08	-0.582	-0.042	0.283	-0.348	-0.475	0.00508	1	0.784	0.672	0.0104	0.729	0.992	1	0.994	0.602
TR1276|c0_g7_i1	AT3G45070.1 | Symbols: | P-loop containing nucleoside triphosphate hydrolases superfamily protein | chr3:16486378-16487349 REVERSE LENGTH=323	-1.26	-0.356	0.0729	-0.411	-0.564	-2.13	-0.296	-0.387	-0.633	-0.811	0.169	0.999	0.99	0.947	0.242	0.00398	0.835	0.994	0.574	0.0992
TR1281|c0_g2_i2	AT2G46270.1 | Symbols: GBF3 | G-box binding factor 3 | chr2:19000859-19002901 FORWARD LENGTH=382	0.561	0.477	0.219	0.0917	-0.227	0.706	1.1	0.423	-0.37	-0.451	0.748	0.986	0.956	1	0.812	0.732	0.0429	1	1	0.747
TR1281|c0_g2_i4	AT2G46270.1 | Symbols: GBF3 | G-box binding factor 3 | chr2:19000859-19002901 FORWARD LENGTH=382	1.25	0.333	-0.0512	0.457	0.511	1.16	1.53	0.168	-0.599	0.0579	0.388	1	0.999	1	0.529	0.496	0.000856	1	0.852	0.99
TR1281|c0_g3_i5	AT2G46270.1 | Symbols: GBF3 | G-box binding factor 3 | chr2:19000859-19002901 FORWARD LENGTH=382	1.3	0.336	0.858	-0.336	0.443	1.67	1.32	0.352	-0.182	0.178	0.226	1	0.367	1	0.455	0.128	0.00273	1	1	0.932
TR1287|c0_g4_i3	AT1G48170.1 | Symbols: | unknown protein; Has 78 Blast hits to 78 proteins in 34 species: Archae - 0; Bacteria - 0; Metazoa - 30; Fungi - 0; Plants - 48; Viruses - 0; Other Eukaryotes - 0 (source: NCBI BLink). | chr1:17788810-17789635 FORWARD LENGTH=153	1.48	-0.633	0.422	1.82	-0.134	0.784	0.13	0.213	-0.0429	0.484	0.253	0.907	0.854	0.000636	0.907	0.73	0.973	1	1	0.78
TR1295|c5_g3_i1	AT1G61800.1 | Symbols: GPT2, ATGPT2 | glucose-6-phosphate/phosphate translocator 2 | chr1:22824527-22826459 FORWARD LENGTH=388	-3.34	-0.597	-0.552	-0.51	-1.68	-0.738	-0.886	-0.209	1.14	-0.778	0.0132	1	0.848	1	0.019	0.817	0.533	1	0.558	0.612
TR1295|c5_g3_i3	AT1G61800.1 | Symbols: GPT2, ATGPT2 | glucose-6-phosphate/phosphate translocator 2 | chr1:22824527-22826459 FORWARD LENGTH=388	-2.94	-0.57	-0.591	-0.152	-1.63	-0.323	-0.533	-0.156	0.957	-0.591	0.0352	1	0.829	1	0.0231	0.943	0.813	1	0.755	0.756
TR1303|c3_g2_i2	AT1G27680.1 | Symbols: APL2 | ADPGLC-PPase large subunit | chr1:9631630-9634450 FORWARD LENGTH=518	-1.4	-0.195	-0.363	-0.455	-0.384	-2.37	-0.0313	-0.602	-0.752	-0.981	0.0599	1	0.768	0.802	0.382	6.49e-05	0.994	0.542	0.246	0.00502
TR1303|c3_g2_i5	AT1G27680.1 | Symbols: APL2 | ADPGLC-PPase large subunit | chr1:9631630-9634450 FORWARD LENGTH=518	-1.23	-0.111	-0.4	-0.315	-0.399	-2.4	-0.013	-0.79	-0.549	-1.05	0.113	1	0.726	1	0.356	4.26e-05	0.999	0.168	0.615	0.00163
TR1303|c3_g2_i6	AT1G27680.1 | Symbols: APL2 | ADPGLC-PPase large subunit | chr1:9631630-9634450 FORWARD LENGTH=518	-1.22	-0.167	-0.381	-0.35	-0.324	-2.43	0.0186	-0.727	-0.752	-0.971	0.128	1	0.756	0.978	0.494	6.13e-05	0.997	0.332	0.276	0.00812
TR1307|c2_g1_i1	AT5G06680.1 | Symbols: SPC98, ATGCP3, ATSPC98, GCP3 | spindle pole body component 98 | chr5:2056741-2059369 FORWARD LENGTH=838	-1.46	-0.12	-0.301	0.0599	-1.1	-0.692	-0.259	0.0385	-0.193	-0.278	0.0999	1	0.848	1	0.033	0.609	0.837	1	1	0.85
TR1315|c0_g1_i2	AT4G01860.2 | Symbols: | Transducin family protein / WD-40 repeat family protein | chr4:801713-808018 REVERSE LENGTH=1308	0.299	-0.11	-0.222	-0.339	0.969	0.673	-0.153	0.128	0.106	0.593	0.839	1	0.928	1	0.0187	0.673	0.946	1	1	0.43
TR1323|c0_g1_i2	AT1G74310.1 | Symbols: ATHSP101, HSP101, HOT1 | heat shock protein 101 | chr1:27936715-27939862 REVERSE LENGTH=911	3.74	0.969	0.0759	1.78	0.923	4.55	2.7	0.0436	-0.327	2.14	0.0842	0.981	1	0.509	0.469	0.0273	0.0124	1	1	0.0873
TR1323|c1_g1_i1	AT1G74310.1 | Symbols: ATHSP101, HSP101, HOT1 | heat shock protein 101 | chr1:27936715-27939862 REVERSE LENGTH=911	5.53	1.3	0.952	1.17	2.11	6.75	3.06	0.283	0.885	2.51	6.65e-06	0.413	0.659	0.68	0.00181	1.62e-09	5.69e-07	1	0.905	4.44e-05
TR1323|c1_g1_i2	AT1G74310.1 | Symbols: ATHSP101, HSP101, HOT1 | heat shock protein 101 | chr1:27936715-27939862 REVERSE LENGTH=911	5.55	1.42	0.478	1.26	2.39	4.64	2.48	-0.18	0.152	2.19	2.96e-05	0.423	0.913	0.583	0.00135	0.000534	0.000806	1	1	0.00398
TR1323|c1_g1_i3	AT1G74310.1 | Symbols: ATHSP101, HSP101, HOT1 | heat shock protein 101 | chr1:27936715-27939862 REVERSE LENGTH=911	8.19	1.26	2.09	1.18	3.66	8.39	5.14	-0.107	0.882	2.48	0.00035	0.927	0.574	1	0.000965	0.000104	2.81e-06	1	1	0.0494
TR1323|c1_g1_i4	AT1G74310.1 | Symbols: ATHSP101, HSP101, HOT1 | heat shock protein 101 | chr1:27936715-27939862 REVERSE LENGTH=911	1.87	1.31	0.737	-0.416	0.24	6.62	3.6	1.14	-0.5	2.38	0.619	0.944	0.922	1	0.913	0.115	0.00582	1	1	0.149
TR1323|c1_g1_i5	AT1G74310.1 | Symbols: ATHSP101, HSP101, HOT1 | heat shock protein 101 | chr1:27936715-27939862 REVERSE LENGTH=911	2.51	1.34	1.34	-0.618	0.444	4.98	3.72	-0.192	-0.705	2.16	0.574	0.986	0.838	1	0.842	0.276	0.0194	1	1	0.332
TR1331|c3_g1_i1	AT5G49810.1 | Symbols: MMT | methionine S-methyltransferase | chr5:20239418-20246046 FORWARD LENGTH=1071	-2.91	-0.265	-0.773	-0.413	-1.45	-3.1	-0.652	-0.122	-0.871	-1.45	0.0474	1	0.736	1	0.092	0.0223	0.722	1	0.78	0.0854
TR1331|c3_g2_i1	AT5G49810.1 | Symbols: MMT | methionine S-methyltransferase | chr5:20239418-20246046 FORWARD LENGTH=1071	-0.852	-0.142	-0.374	-0.134	-0.202	-0.936	-0.111	0.0679	-0.0689	-0.824	0.348	1	0.767	1	0.716	0.402	0.962	1	1	0.0454
TR1331|c3_g2_i2	AT5G49810.1 | Symbols: MMT | methionine S-methyltransferase | chr5:20239418-20246046 FORWARD LENGTH=1071	-2.87	-0.818	-0.958	0.241	-1.34	-1.75	-0.196	-0.0299	-0.112	-1.41	0.0325	0.809	0.534	1	0.105	0.328	0.955	1	1	0.0611
TR1331|c3_g2_i4	AT5G49810.1 | Symbols: MMT | methionine S-methyltransferase | chr5:20239418-20246046 FORWARD LENGTH=1071	-0.843	0.0128	-0.213	-0.116	-0.526	-1.38	-0.205	-0.0799	-0.172	-0.921	0.35	1	0.918	1	0.22	0.0999	0.897	1	1	0.0129
TR1334|c2_g2_i1	AT2G23740.1 | Symbols: | nucleic acid binding;sequence-specific DNA binding transcription factors;zinc ion binding | chr2:10098213-10103229 FORWARD LENGTH=1375	-2.25	-0.574	-0.502	-0.221	-0.955	-0.679	-0.406	-0.142	-0.21	0.0786	0.0333	0.904	0.769	1	0.159	0.742	0.795	1	1	0.982
TR1343|c1_g1_i2	AT3G09660.1 | Symbols: MCM8 | minichromosome maintenance 8 | chr3:2961314-2966166 REVERSE LENGTH=777	0.921	0.185	0.0976	0.423	0.216	1.24	0.835	0.223	0.179	-0.00141	0.145	1	0.966	0.633	0.58	0.0338	0.00144	1	1	1
TR1343|c1_g1_i3	AT3G09660.1 | Symbols: MCM8 | minichromosome maintenance 8 | chr3:2961314-2966166 REVERSE LENGTH=777	0.84	0.149	0.0926	0.287	0.312	0.743	0.625	0.222	-0.152	0.0477	0.181	1	0.968	0.938	0.366	0.364	0.0426	1	1	0.979
TR1343|c1_g1_i6	AT3G09650.1 | Symbols: HCF152, CRM3 | Tetratricopeptide repeat (TPR)-like superfamily protein | chr3:2958704-2961040 FORWARD LENGTH=778	1.24	0.247	0.179	0.39	0.418	1.21	0.712	0.424	0.0667	0.00946	0.0427	1	0.918	0.763	0.228	0.0603	0.0247	0.754	1	1
TR1343|c1_g1_i7	AT3G09650.1 | Symbols: HCF152, CRM3 | Tetratricopeptide repeat (TPR)-like superfamily protein | chr3:2958704-2961040 FORWARD LENGTH=778	1.4	0.164	0.243	0.626	0.364	0.957	0.692	0.152	0.0207	0.0914	0.00935	1	0.837	0.152	0.272	0.159	0.0158	1	1	0.946
TR1345|c1_g3_i2	AT5G51560.1 | Symbols: | Leucine-rich repeat protein kinase family protein | chr5:20945807-20948613 FORWARD LENGTH=680	-1.96	-0.348	-0.422	-0.17	-1.02	-1.95	-0.514	-0.241	-0.437	-0.759	0.007	0.996	0.726	1	0.00933	0.00524	0.476	1	0.867	0.124
TR1348|c0_g1_i3	AT5G55040.2 | Symbols: | DNA-binding bromodomain-containing protein | chr5:22327727-22331703 REVERSE LENGTH=916	-2.85	-0.404	-0.586	-0.599	-1.26	-0.723	-0.067	-0.142	-0.0721	-0.442	0.0305	1	0.83	0.983	0.0799	0.802	0.992	1	1	0.842
TR1352|c5_g4_i2	AT3G15750.1 | Symbols: | Essential protein Yae1, N-terminal | chr3:5335089-5336184 FORWARD LENGTH=199	1.21	0.607	0.448	-0.0387	0.192	3.52	1.69	0.744	0.433	0.644	0.605	1	0.925	1	0.906	0.0361	0.101	0.997	1	0.794
TR1363|c3_g2_i1	AT1G27210.1 | Symbols: | ARM repeat superfamily protein | chr1:9455669-9457917 REVERSE LENGTH=625	-1.87	-0.599	-0.494	-0.278	-0.5	-0.575	0.228	-0.488	-0.354	0.0401	0.0469	0.841	0.743	1	0.373	0.768	0.915	0.946	1	0.994
TR1363|c3_g2_i2	AT1G27210.1 | Symbols: | ARM repeat superfamily protein | chr1:9455669-9457917 REVERSE LENGTH=625	-1.91	-0.495	-0.576	-0.287	-0.557	-0.786	0.143	-0.169	-0.483	-0.276	0.0263	0.931	0.627	1	0.271	0.607	0.953	1	0.867	0.855
TR1374|c0_g1_i6	AT1G71220.2 | Symbols: EBS1 | UDP-glucose:glycoprotein glucosyltransferases;transferases, transferring hexosyl groups;transferases, transferring glycosyl groups | chr1:26841664-26851730 FORWARD LENGTH=1614	-1.44	-0.604	-0.329	0.0117	-0.517	-0.337	-0.346	0.0309	-0.122	0.0993	0.0316	0.357	0.757	1	0.227	0.823	0.655	1	1	0.957
TR1383|c3_g2_i1	AT1G60590.1 | Symbols: | Pectin lyase-like superfamily protein | chr1:22314426-22316867 REVERSE LENGTH=540	0.0397	0.0981	0.116	-0.361	0.187	0.161	0.775	-0.42	-0.423	0.228	0.992	1	0.968	0.904	0.689	0.939	0.0267	0.89	0.773	0.829
TR1385|c3_g1_i1	No informative hit E<10-6	-2.19	-0.492	-0.851	-0.054	-0.794	-0.982	-0.477	-0.125	-0.118	-0.262	0.0316	0.948	0.398	1	0.238	0.542	0.686	1	1	0.892
TR1385|c3_g1_i2	No informative hit E<10-6	-2.41	-0.385	-1.06	0.0947	-1.05	-0.669	-0.454	0.0722	-0.0514	-0.235	0.0117	1	0.148	1	0.0926	0.71	0.678	1	1	0.903
TR1843|c0_g1_i1	AT5G20490.1 | Symbols: XIK, ATXIK, XI-17 | Myosin family protein with Dil domain | chr5:6927064-6936825 REVERSE LENGTH=1545	-2.63	-0.251	-1.12	0.378	-1.63	-1.81	-0.528	-0.439	-0.846	-0.00191	0.0547	1	0.425	1	0.0336	0.299	0.774	1	0.746	1
TR1843|c0_g1_i2	AT5G20490.1 | Symbols: XIK, ATXIK, XI-17 | Myosin family protein with Dil domain | chr5:6927064-6936825 REVERSE LENGTH=1545	-3	-0.418	-1.03	-0.0162	-1.53	-0.751	-0.256	0.309	-0.396	-0.408	0.00713	1	0.398	1	0.0247	0.737	0.913	1	1	0.819
TR1843|c0_g1_i3	AT5G20490.1 | Symbols: XIK, ATXIK, XI-17 | Myosin family protein with Dil domain | chr5:6927064-6936825 REVERSE LENGTH=1545	-3.74	-0.268	-1.43	-0.458	-1.58	-1.46	-0.313	-0.223	-0.722	-0.199	0.00666	1	0.325	1	0.067	0.499	0.916	1	0.905	0.956
TR1844|c2_g1_i1	AT3G15570.1 | Symbols: | Phototropic-responsive NPH3 family protein | chr3:5270267-5271700 REVERSE LENGTH=452	-1.76	-0.341	-0.0809	0.158	-1.49	-1.24	-0.246	0.0697	-0.286	-0.776	0.246	1	0.995	1	0.0371	0.576	0.94	1	1	0.616
TR1844|c2_g1_i3	AT1G52770.1 | Symbols: | Phototropic-responsive NPH3 family protein | chr1:19656009-19657546 FORWARD LENGTH=454	-1.56	0.00933	0.352	-0.452	-1.47	-1.18	-0.106	0.11	-0.396	-0.786	0.359	1	0.938	1	0.0481	0.626	0.984	1	1	0.583
TR1846|c1_g1_i2	No informative hit E<10-6	4.23	1.41	-0.686	0.615	2.88	2.22	0.457	1.07	-0.68	1.37	0.188	1	0.923	1	0.000521	0.572	0.956	1	0.991	0.476
TR1848|c1_g2_i1	AT5G07290.1 | Symbols: AML4, ML4 | MEI2-like 4 | chr5:2294248-2298491 FORWARD LENGTH=907	-2.49	-0.33	-0.792	-0.228	-1.14	-1.77	-0.356	-0.396	-0.416	-0.605	0.0194	1	0.545	1	0.0478	0.191	0.858	1	1	0.612
TR1858|c2_g1_i7	AT1G24090.1 | Symbols: | RNase H family protein | chr1:8520834-8522737 FORWARD LENGTH=353	-5.11	-1.4	-0.66	-0.888	-2.16	0.494	-0.133	0.603	0.417	-0.394	0.00679	0.694	0.866	0.976	0.09	0.932	0.986	1	1	0.938
TR1861|c1_g3_i1	AT3G62910.1 | Symbols: APG3 | Peptide chain release factor 1 | chr3:23257661-23260386 REVERSE LENGTH=422	3.55	0.0499	0.511	0.0159	2.97	3.84	-2.41	0.0731	-1.94	8.11	0.545	1	0.981	1	0.289	0.595	0.667	1	0.986	0.0176
TR1862|c0_g4_i6	AT4G29310.1 | Symbols: | Protein of unknown function (DUF1005) | chr4:14437892-14439609 REVERSE LENGTH=424	-0.767	0.045	0.662	-0.148	-1.33	-1.85	-1.93	0.267	-0.431	0.239	0.651	1	0.73	1	0.0241	0.189	0.000264	1	0.987	0.919
TR1862|c0_g4_i8	AT4G29310.1 | Symbols: | Protein of unknown function (DUF1005) | chr4:14437892-14439609 REVERSE LENGTH=424	-0.62	0.19	-0.199	-0.376	-0.235	-1.53	-2.14	0.343	-0.392	0.661	0.787	1	0.975	1	0.834	0.511	0.00355	1	1	0.722
TR1866|c2_g2_i1	AT3G15020.2 | Symbols: mMDH2 | Lactate/malate dehydrogenase family protein | chr3:5056139-5057865 FORWARD LENGTH=316	-0.851	-0.0994	0.0798	0.485	-1.32	0.49	0.42	0.0798	0.385	-0.394	0.509	1	0.99	0.951	0.00597	0.828	0.778	1	1	0.78
TR1868|c1_g1_i1	No informative hit E<10-6	0.173	-0.254	-0.788	-0.234	1.45	-0.832	-0.089	-0.27	-0.0532	-0.42	0.959	1	0.684	1	0.0428	0.75	0.986	1	1	0.856
TR1870|c2_g1_i6	AT1G52540.1 | Symbols: | Protein kinase superfamily protein | chr1:19570298-19571884 REVERSE LENGTH=350	0.165	0.164	0.111	-0.105	-0.00508	1.46	1.46	0.102	-0.0116	-0.0821	0.96	1	0.989	1	1	0.43	0.0296	1	1	0.984
TR1889|c0_g1_i1	No informative hit E<10-6	2.33	-0.767	-0.149	0.124	3.12	-0.517	0.72	0.138	-0.917	-0.458	0.4	1	0.993	1	0.00661	0.941	0.862	1	0.996	0.922
TR1893|c0_g1_i3	AT3G50780.1 | Symbols: | BEST Arabidopsis thaliana protein match is: BTB/POZ domain-containing protein (TAIR:AT1G63850.1); Has 298 Blast hits to 298 proteins in 22 species: Archae - 0; Bacteria - 0; Metazoa - 10; Fungi - 0; Plants - 287; Viruses - 0; Other Eukaryotes - 1 (source: NCBI BLink). | chr3:18875662-18877341 REVERSE LENGTH=520	-1.19	-0.179	-0.26	-0.276	-0.473	-2	-0.698	-0.112	-0.612	-0.582	0.261	1	0.922	1	0.406	0.0244	0.335	1	0.678	0.512
TR1902|c1_g2_i1	AT3G63410.1 | Symbols: APG1, VTE3, IEP37, E37 | S-adenosyl-L-methionine-dependent methyltransferases superfamily protein | chr3:23415816-23417002 REVERSE LENGTH=338	2.02	0.355	0.585	0.542	0.536	0.643	0.236	-0.0374	0.122	0.322	0.00415	0.988	0.513	0.68	0.206	0.647	0.875	1	1	0.756
TR1902|c1_g2_i5	AT3G63410.1 | Symbols: APG1, VTE3, IEP37, E37 | S-adenosyl-L-methionine-dependent methyltransferases superfamily protein | chr3:23415816-23417002 REVERSE LENGTH=338	1.95	0.4	0.54	0.377	0.633	0.516	0.227	-0.131	0.0504	0.369	0.00953	0.962	0.609	0.969	0.138	0.756	0.891	1	1	0.717
TR1909|c0_g1_i9	AT5G20660.2 | Symbols: | Zn-dependent exopeptidases superfamily protein | chr5:6989708-6990947 FORWARD LENGTH=301	-0.663	0.0344	-0.42	-0.36	0.0821	2.21	-1.16	-0.868	-0.107	4.34	0.88	1	0.963	1	0.976	0.67	0.75	1	1	0.00157
TR1916|c1_g1_i2	AT3G20440.1 | Symbols: EMB2729, BE1 | Alpha amylase family protein | chr3:7123603-7130364 REVERSE LENGTH=869	3.54	1.08	1.22	1.19	0.0678	3.05	0.353	1.34	1.18	0.174	0.0186	0.853	0.341	0.354	0.974	0.0454	0.917	0.283	0.343	0.973
TR1916|c1_g1_i3	AT3G20440.2 | Symbols: EMB2729, BE1 | Alpha amylase family protein | chr3:7123603-7130364 REVERSE LENGTH=899	0.809	0.547	0.0261	0.928	-0.692	2.82	0.274	0.868	0.924	0.757	0.739	1	1	0.587	0.605	0.038	0.936	0.729	0.595	0.684
TR1916|c1_g1_i4	AT3G20440.2 | Symbols: EMB2729, BE1 | Alpha amylase family protein | chr3:7123603-7130364 REVERSE LENGTH=899	0.362	-0.206	-0.254	0.985	-0.163	2.55	0.0475	0.738	1.26	0.506	0.899	1	0.947	0.435	0.926	0.0474	0.995	0.815	0.158	0.817
TR1916|c1_g1_i5	AT3G20440.2 | Symbols: EMB2729, BE1 | Alpha amylase family protein | chr3:7123603-7130364 REVERSE LENGTH=899	1.23	0.411	0.268	0.524	0.0312	2.38	0.523	1.01	0.769	0.081	0.472	1	0.925	0.905	0.992	0.0334	0.735	0.261	0.519	0.988
TR1916|c1_g1_i6	AT3G20440.2 | Symbols: EMB2729, BE1 | Alpha amylase family protein | chr3:7123603-7130364 REVERSE LENGTH=899	0.257	-0.208	-0.235	0.726	-0.0267	2.87	0.27	0.973	0.899	0.73	0.918	1	0.947	0.691	0.99	0.00456	0.914	0.397	0.442	0.585
TR1922|c3_g3_i3	AT5G15350.1 | Symbols: ENODL17, AtENODL17 | early nodulin-like protein 17 | chr5:4985184-4986154 REVERSE LENGTH=172	-0.483	0.324	0.0688	0.0711	-0.947	-2.07	-1.64	-0.552	-0.0625	0.184	0.84	1	0.996	1	0.24	0.262	0.038	1	1	0.964
TR1945|c2_g1_i9	AT2G29070.1 | Symbols: | Ubiquitin fusion degradation UFD1 family protein | chr2:12488061-12489335 FORWARD LENGTH=280	5.34	5.57	-5.77	0	5.54	0.12	0.377	0.131	0.0992	-0.488	1	0.0536	0.0425	1	0.0359	0.998	0.951	1	1	0.919
TR1948|c0_g5_i1	AT3G14440.1 | Symbols: NCED3, ATNCED3, STO1, SIS7 | nine-cis-epoxycarotenoid dioxygenase 3 | chr3:4831678-4833477 REVERSE LENGTH=599	-1.6	-1.14	-1.52	-0.14	1.2	-4.68	1.13	-2.04	-1.29	-2.48	0.541	0.87	0.561	1	0.293	0.014	0.584	0.432	0.674	0.0104
TR1951|c0_g1_i2	AT4G27460.1 | Symbols: | Cystathionine beta-synthase (CBS) family protein | chr4:13732939-13734263 FORWARD LENGTH=391	0.527	-0.0754	0.174	-0.534	0.962	-0.341	-1.26	0.248	0.276	0.4	0.755	1	0.968	0.937	0.0953	0.913	0.0453	1	1	0.826
TR1966|c0_g1_i1	AT1G62530.2 | Symbols: | Plant protein of unknown function (DUF863) | chr1:23146332-23147386 REVERSE LENGTH=312	-0.447	-0.0103	-0.115	-0.257	-0.0648	-1.64	-0.214	-0.448	-0.351	-0.628	0.704	1	0.97	1	0.941	0.027	0.887	0.863	0.949	0.3
TR1986|c1_g1_i1	AT1G67960.1 | Symbols: | CONTAINS InterPro DOMAIN/s: Membrane protein,Tapt1/CMV receptor (InterPro:IPR008010); Has 447 Blast hits to 428 proteins in 176 species: Archae - 0; Bacteria - 0; Metazoa - 190; Fungi - 133; Plants - 49; Viruses - 0; Other Eukaryotes - 75 (source: NCBI BLink). | chr1:25480808-25484176 REVERSE LENGTH=624	-2.75	-0.295	-0.792	-0.376	-1.28	-0.894	-0.557	-0.0384	-0.0926	-0.206	0.0382	1	0.687	1	0.116	0.713	0.729	1	1	0.951
TR1997|c2_g2_i2	AT5G20270.1 | Symbols: HHP1 | heptahelical transmembrane protein1 | chr5:6841025-6842656 REVERSE LENGTH=332	2.24	0.18	0.64	0.576	0.84	1.15	0.594	-0.173	0.252	0.473	0.0189	1	0.615	0.865	0.117	0.439	0.569	1	1	0.691
TR2003|c0_g1_i2	AT1G28330.2 | Symbols: DYL1 | dormancy-associated protein-like 1 | chr1:9934500-9935216 REVERSE LENGTH=132	1.14	-1.45	-0.0789	-0.179	2.85	0.952	-0.277	0.366	-0.19	1.05	0.727	0.829	0.999	1	0.00546	0.86	0.971	1	1	0.726
TR2005|c2_g1_i6	No informative hit E<10-6	2.16	0.495	0.559	0.0472	1.06	-0.481	-0.406	-0.437	-0.182	0.545	0.0453	0.999	0.752	1	0.0566	0.854	0.824	1	1	0.671
TR2051|c0_g1_i2	AT1G54990.1 | Symbols: AXR4, RGR, RGR1 | alpha/beta-Hydrolases superfamily protein | chr1:20511565-20513489 FORWARD LENGTH=473	1.17	-0.291	-0.571	-0.161	2.2	-0.903	-0.522	0.0568	-0.203	-0.235	0.694	1	0.92	1	0.0319	0.851	0.903	1	1	0.967
TR2051|c0_g1_i4	AT1G54990.1 | Symbols: AXR4, RGR, RGR1 | alpha/beta-Hydrolases superfamily protein | chr1:20511565-20513489 FORWARD LENGTH=473	1.02	-1	-0.312	-0.331	2.67	-0.541	-0.791	0.41	-0.247	0.087	0.766	0.986	0.973	1	0.0133	0.936	0.826	1	1	0.995
TR2053|c0_g2_i1	No informative hit E<10-6	3.13	0.781	0.997	-0.0281	1.38	0.966	0.443	-0.849	0.717	0.654	0.00345	0.846	0.432	1	0.0104	0.662	0.836	0.735	0.781	0.6
TR2074|c0_g1_i15	AT5G42770.2 | Symbols: | Maf-like protein | chr5:17152147-17154355 FORWARD LENGTH=233	2.16	0.321	0.675	-0.589	1.75	2.01	1.12	0.142	0.598	0.144	0.133	1	0.781	0.988	0.00328	0.274	0.303	1	0.987	0.969
TR2074|c0_g1_i4	AT5G42770.2 | Symbols: | Maf-like protein | chr5:17152147-17154355 FORWARD LENGTH=233	1.6	1.23	0.0566	-1.1	1.41	1.71	0.593	0.384	-0.123	0.86	0.316	0.398	0.999	0.467	0.0267	0.393	0.761	1	1	0.483
TR2089|c0_g1_i2	AT1G27730.1 | Symbols: STZ, ZAT10 | salt tolerance zinc finger | chr1:9648302-9648985 REVERSE LENGTH=227	2.99	0.517	0.666	1.05	0.752	3.33	2.31	0.507	0.0234	0.494	0.154	1	0.891	0.952	0.512	0.123	0.0181	1	1	0.864
TR2096|c0_g1_i2	AT5G60200.1 | Symbols: TMO6 | TARGET OF MONOPTEROS 6 | chr5:24241078-24241951 FORWARD LENGTH=257	-1.78	-0.1	-0.449	0.236	-1.46	-0.79	-0.144	0.0559	-0.0635	-0.639	0.223	1	0.887	1	0.0334	0.765	0.971	1	1	0.711
TR2100|c0_g1_i1	AT3G12580.1 | Symbols: HSP70, ATHSP70 | heat shock protein 70 | chr3:3991487-3993689 REVERSE LENGTH=650	7.78	1.19	2.41	0.67	3.51	6.88	3.63	0.59	0.0429	2.62	0.000335	0.927	0.439	1	0.00128	0.000358	0.000569	1	1	0.027
TR2100|c0_g1_i2	AT3G12580.1 | Symbols: HSP70, ATHSP70 | heat shock protein 70 | chr3:3991487-3993689 REVERSE LENGTH=650	6.18	2.34	1.46	-0.0449	2.42	5.91	3.88	-0.123	0.306	1.85	1.4e-06	0.00577	0.361	1	0.00115	2.83e-06	4.79e-09	1	1	0.0281
TR2100|c0_g1_i3	AT3G12580.1 | Symbols: HSP70, ATHSP70 | heat shock protein 70 | chr3:3991487-3993689 REVERSE LENGTH=650	6.56	1.29	1.05	1.14	3.08	6.16	3.91	0.0323	-0.573	2.79	0.00239	0.86	0.842	1	0.00388	0.00286	0.000104	1	1	0.0104
TR2101|c1_g1_i2	AT3G52720.2 | Symbols: CAH1, ATACA1, ACA1 | alpha carbonic anhydrase 1 | chr3:19539617-19541116 REVERSE LENGTH=230	-1.9	-0.672	-0.208	0.337	-1.36	0.384	0.773	-0.228	0.122	-0.283	0.191	0.953	0.97	1	0.0401	0.919	0.599	1	1	0.917
TR2111|c13_g1_i1	ATMG00860.1 | Symbols: ORF158 | DNA/RNA polymerases superfamily protein | chrM:235916-236392 FORWARD LENGTH=158	-3.03	-0.455	-0.89	-0.52	-1.17	-1.83	0.506	-3.56	1.22	0	0.0448	1	0.678	1	0.197	1	0.96	0.689	1	1
TR2111|c13_g1_i4	ATMG00860.1 | Symbols: ORF158 | DNA/RNA polymerases superfamily protein | chrM:235916-236392 FORWARD LENGTH=158	-3.19	-0.416	-1	-0.156	-1.61	-4.33	-2.6	-3.86	0.00462	2.12	0.0227	1	0.545	1	0.0452	1	0.664	0.551	1	0.817
TR2129|c4_g1_i6	AT4G29860.1 | Symbols: EMB2757, TAN | Transducin/WD40 repeat-like superfamily protein | chr4:14603296-14605704 REVERSE LENGTH=386	0.152	0.471	0.909	0.208	-1.44	4.24	0.762	0.332	0.387	2.76	0.991	1	0.667	1	0.356	0.0167	0.813	1	1	0.0188
TR2132|c1_g2_i1	No informative hit E<10-6	4.34	1.08	1.09	0.13	2.04	-1.21	-0.327	-0.76	-0.0926	-0.0318	0.00569	0.844	0.67	1	0.0187	0.662	0.93	0.961	1	1
TR2137|c0_g2_i1	AT5G58530.1 | Symbols: | Glutaredoxin family protein | chr5:23660428-23661249 FORWARD LENGTH=273	1.52	-0.0468	-0.141	-0.275	1.98	-0.328	-0.171	-0.0926	0.0472	-0.111	0.512	1	0.99	1	0.0223	0.955	0.977	1	1	0.987
TR2138|c5_g6_i12	AT5G64420.1 | Symbols: | DNA polymerase V family | chr5:25756416-25761122 FORWARD LENGTH=1306	-2.12	-0.49	-0.332	-0.466	-0.836	0.989	-0.113	0.28	0.669	0.153	0.0353	0.963	0.89	0.971	0.171	0.55	0.972	1	0.728	0.95
TR2138|c5_g6_i6	AT5G64420.1 | Symbols: | DNA polymerase V family | chr5:25756416-25761122 FORWARD LENGTH=1306	-2.26	-0.528	-0.432	-0.243	-1.06	0.547	-0.22	0.259	0.562	-0.0539	0.0201	0.932	0.811	1	0.0614	0.8	0.926	1	0.856	0.99
TR2684|c4_g2_i1	AT1G30520.1 | Symbols: AAE14 | acyl-activating enzyme 14 | chr1:10811039-10813546 FORWARD LENGTH=560	0.964	0.0817	0.214	-0.0572	0.725	0.924	0.254	0.14	0.0401	0.49	0.194	1	0.899	1	0.0304	0.323	0.821	1	1	0.384
TR2685|c1_g1_i2	No informative hit E<10-6	-3.01	-1.18	-0.852	-0.00472	-0.977	-0.876	0.183	-0.783	0.092	-0.368	0.0373	0.495	0.671	1	0.309	0.759	0.965	0.902	1	0.895
TR2690|c1_g2_i4	AT3G01410.2 | Symbols: | Polynucleotidyl transferase, ribonuclease H-like superfamily protein | chr3:153650-155439 REVERSE LENGTH=294	9.78	2.08	1.76	3.31	2.63	-3.41	0.227	-0.724	-2.71	-0.203	0.0134	0.958	0.829	0.464	0.31	0.581	0.989	1	0.635	0.99
TR2696|c0_g3_i5	AT5G53930.1 | Symbols: | unknown protein; LOCATED IN: chloroplast; Has 1807 Blast hits to 1807 proteins in 277 species: Archae - 0; Bacteria - 0; Metazoa - 736; Fungi - 347; Plants - 385; Viruses - 0; Other Eukaryotes - 339 (source: NCBI BLink). | chr5:21894387-21896283 REVERSE LENGTH=529	2.32	0.442	0.826	0.328	0.725	3.39	0.818	0.994	0.535	1.04	0.0506	1	0.573	1	0.285	0.000856	0.454	0.54	0.972	0.212
TR2696|c0_g4_i1	No informative hit E<10-6	0.656	-0.245	0.44	0.401	0.0597	4.93	0.892	1.87	0.403	1.76	0.861	1	0.952	1	0.982	0.0192	0.778	0.523	1	0.311
TR2701|c0_g2_i2	AT1G20230.1 | Symbols: | Pentatricopeptide repeat (PPR) superfamily protein | chr1:7009570-7011852 FORWARD LENGTH=760	-4.28	-0.39	-0.635	-0.278	-2.98	-0.397	0.172	0.573	0.364	-1.51	0.0332	1	0.721	1	0.103	0.929	0.965	0.953	1	0.561
TR2711|c3_g2_i4	No informative hit E<10-6	4.07	0.256	0.889	0.368	2.55	2.86	0.389	-0.272	1.03	1.72	0.0462	1	0.831	1	0.0173	0.298	0.936	1	0.912	0.247
TR2730|c1_g2_i2	AT1G18370.1 | Symbols: HIK, ATNACK1, NACK1 | ATP binding microtubule motor family protein | chr1:6319732-6323820 REVERSE LENGTH=974	4.22	1.45	0.185	0.362	2.22	-0.319	-0.826	-0.624	0.275	0.856	0.0401	0.786	0.988	1	0.0398	0.966	0.795	1	1	0.78
TR2730|c1_g5_i3	AT1G18370.1 | Symbols: HIK, ATNACK1, NACK1 | ATP binding microtubule motor family protein | chr1:6319732-6323820 REVERSE LENGTH=974	-2.75	-0.597	-0.229	-0.363	-1.56	-1.18	-0.101	-0.00242	-0.421	-0.659	0.0368	0.983	0.96	1	0.0584	0.546	0.981	1	1	0.664
TR2753|c1_g3_i1	No informative hit E<10-6	-6.89	-0.817	-0.0629	0.86	-6.87	-1.09	0.266	1.39	-1.83	-0.916	0.0942	1	1	1	0.0092	0.898	0.981	1	0.827	0.878
TR2756|c3_g3_i1	AT2G21790.1 | Symbols: R1, RNR1, CLS8, ATRNR1 | ribonucleotide reductase 1 | chr2:9293529-9297580 FORWARD LENGTH=816	-1.43	-0.12	-0.365	-0.0417	-0.906	-1.25	-0.364	-0.014	-0.342	-0.531	0.0523	1	0.732	1	0.0317	0.119	0.644	1	0.949	0.402
TR2756|c3_g3_i2	AT2G21790.1 | Symbols: R1, RNR1, CLS8, ATRNR1 | ribonucleotide reductase 1 | chr2:9293529-9297580 FORWARD LENGTH=816	-1.73	-0.385	-0.286	0.17	-1.23	-1.16	-0.238	-0.0355	-0.31	-0.577	0.0232	0.938	0.839	1	0.00631	0.203	0.846	1	0.992	0.376
TR2756|c3_g3_i4	AT2G21790.1 | Symbols: R1, RNR1, CLS8, ATRNR1 | ribonucleotide reductase 1 | chr2:9293529-9297580 FORWARD LENGTH=816	-1.72	-0.288	-0.391	0.139	-1.18	-1.56	-0.497	0.203	-0.184	-1.08	0.018	1	0.712	1	0.00585	0.0295	0.383	1	1	0.00299
TR2764|c1_g2_i1	AT3G14390.1 | Symbols: | Pyridoxal-dependent decarboxylase family protein | chr3:4806771-4808954 FORWARD LENGTH=484	-0.161	0.102	-0.474	-0.603	0.813	5.95	2.94	2.54	0.588	-0.123	0.989	1	0.957	1	0.626	0.0137	0.0513	0.32	1	0.992
TR2764|c1_g3_i3	AT5G11880.1 | Symbols: | Pyridoxal-dependent decarboxylase family protein | chr5:3827806-3829942 REVERSE LENGTH=489	0.105	0.285	0.679	0.861	-1.72	0.0369	-0.641	-0.0889	-0.119	0.886	0.989	1	0.824	0.887	0.0433	1	0.789	1	1	0.603
TR2779|c2_g4_i1	AT5G53460.3 | Symbols: GLT1 | NADH-dependent glutamate synthase 1 | chr5:21700518-21709629 FORWARD LENGTH=2208	-1.37	-0.599	-0.0194	-0.333	-0.42	-1.21	-0.843	-0.0129	-0.25	-0.109	0.0606	0.544	1	0.947	0.365	0.155	0.0282	1	1	0.956
TR2779|c2_g4_i2	AT5G53460.3 | Symbols: GLT1 | NADH-dependent glutamate synthase 1 | chr5:21700518-21709629 FORWARD LENGTH=2208	-1.63	-0.415	-0.257	-0.358	-0.601	-0.952	-0.725	0.00227	-0.259	0.0303	0.0324	0.944	0.885	0.952	0.189	0.404	0.148	1	1	0.995
TR2779|c2_g4_i9	AT5G53460.3 | Symbols: GLT1 | NADH-dependent glutamate synthase 1 | chr5:21700518-21709629 FORWARD LENGTH=2208	-1.52	-0.478	-0.153	-0.299	-0.59	-1.05	-0.717	-0.00772	-0.167	-0.158	0.0417	0.838	0.951	1	0.18	0.298	0.133	1	1	0.925
TR2780|c0_g1_i9	AT3G25660.1 | Symbols: | Amidase family protein | chr3:9339640-9342044 REVERSE LENGTH=537	3.3	0.411	-0.248	0.31	2.83	0.697	-0.823	0.195	0.443	0.883	0.0474	1	0.971	1	0.000624	0.869	0.705	1	1	0.665
TR2784|c1_g1_i1	AT5G17540.1 | Symbols: | HXXXD-type acyl-transferase family protein | chr5:5782061-5783682 REVERSE LENGTH=461	2.24	0.539	0.527	0.971	0.201	2.76	0.585	0.556	0.569	1.05	0.0719	0.996	0.814	0.5	0.847	0.0209	0.733	0.994	0.95	0.261
TR2790|c1_g1_i4	AT3G26580.1 | Symbols: | Tetratricopeptide repeat (TPR)-like superfamily protein | chr3:9758933-9760349 FORWARD LENGTH=350	1.64	-0.0575	0.279	0.459	0.962	-1.19	-0.374	0.108	-0.426	-0.496	0.0234	1	0.848	0.77	0.0208	0.204	0.667	1	0.826	0.562
TR2796|c0_g1_i5	AT5G14430.1 | Symbols: | S-adenosyl-L-methionine-dependent methyltransferases superfamily protein | chr5:4653092-4655741 FORWARD LENGTH=612	-4.01	-0.472	-0.891	-0.409	-2.24	-0.417	-0.185	0.103	-0.485	0.15	7.23e-05	1	0.503	1	0.000115	0.895	0.957	1	0.996	0.963
TR2797|c1_g1_i1	AT5G56040.1 | Symbols: | Leucine-rich receptor-like protein kinase family protein | chr5:22695050-22697911 FORWARD LENGTH=953	-2.88	-0.0173	-0.729	-0.499	-1.64	-2.37	-0.767	-0.0872	-0.541	-0.972	0.0729	1	0.796	1	0.0439	0.247	0.708	1	1	0.531
TR2797|c1_g1_i2	AT5G56040.1 | Symbols: | Leucine-rich receptor-like protein kinase family protein | chr5:22695050-22697911 FORWARD LENGTH=953	-3.34	-0.34	-0.172	-0.417	-2.41	-5.87	-1.74	-0.491	-2.2	-1.44	0.277	1	0.993	1	0.115	0.0147	0.449	1	0.372	0.58
TR2797|c1_g2_i1	AT5G56040.2 | Symbols: | Leucine-rich receptor-like protein kinase family protein | chr5:22695050-22698410 FORWARD LENGTH=1090	-0.626	0.344	-0.118	-0.349	-0.502	-1.65	-0.591	-0.111	-0.479	-0.466	0.483	0.962	0.964	0.938	0.186	0.0122	0.242	1	0.688	0.461
TR2808|c3_g1_i1	AT2G02780.1 | Symbols: | Leucine-rich repeat protein kinase family protein | chr2:781932-784646 REVERSE LENGTH=742	1.26	0.116	0.433	-0.164	0.879	0.428	0.261	-0.204	0.158	0.213	0.154	1	0.742	1	0.03	0.817	0.867	1	1	0.888
TR2833|c0_g3_i2	AT5G13970.1 | Symbols: | unknown protein; FUNCTIONS IN: molecular_function unknown; INVOLVED IN: biological_process unknown; LOCATED IN: endomembrane system; EXPRESSED IN: 23 plant structures; EXPRESSED DURING: 13 growth stages; BEST Arabidopsis thaliana protein match is: unknown protein (TAIR:AT5G13310.1); Has 1807 Blast hits to 1807 proteins in 277 species: Archae - 0; Bacteria - 0; Metazoa - 7…	2.08	0.329	0.0625	0.285	1.41	-0.401	0.102	-0.213	0.232	-0.521	0.15	1	0.997	1	0.0467	0.909	0.983	1	1	0.789
TR2833|c0_g3_i4	No informative hit E<10-6	-1.94	0.623	0.413	-0.242	-2.73	-1.45	-1.77	-0.548	0.265	0.606	0.499	1	0.953	1	0.044	0.753	0.362	1	1	0.884
TR2846|c2_g1_i5	AT5G18670.1 | Symbols: BMY3, BAM9 | beta-amylase 3 | chr5:6226138-6227999 FORWARD LENGTH=536	0.918	0.129	0.0717	0.371	0.346	2.44	0.423	0.545	-0.2	1.67	0.351	1	0.989	0.978	0.488	0.000329	0.691	0.788	1	1.3e-07
TR2846|c2_g1_i8	AT5G18670.1 | Symbols: BMY3, BAM9 | beta-amylase 3 | chr5:6226138-6227999 FORWARD LENGTH=536	0.883	-0.256	0.139	0.266	0.734	1.77	0.0711	0.108	-0.0946	1.68	0.355	1	0.963	1	0.0524	0.0199	0.981	1	1	2.19e-08
TR2846|c2_g1_i9	AT5G18670.1 | Symbols: BMY3, BAM9 | beta-amylase 3 | chr5:6226138-6227999 FORWARD LENGTH=536	1.02	0.0346	-0.0295	0.631	0.379	3.95	1.16	0.845	-0.365	2.31	0.47	1	1	0.831	0.58	4.34e-06	0.112	0.616	1	1.12e-07
TR2848|c0_g2_i19	AT3G22480.1 | Symbols: PDF2 | prefoldin 2 | chr3:7969080-7969526 FORWARD LENGTH=148	2.44	1.34	0.527	0.0344	0.541	0.037	0.259	-0.209	-0.0941	0.0811	0.0431	0.0964	0.821	1	0.509	1	0.935	1	1	0.987
TR2848|c0_g2_i8	AT3G22480.1 | Symbols: PDF2 | prefoldin 2 | chr3:7969080-7969526 FORWARD LENGTH=148	2.64	1.38	0.729	-0.0274	0.567	0.53	0.358	-0.0864	-0.0305	0.289	0.0427	0.183	0.724	1	0.505	0.881	0.902	1	1	0.923
TR2851|c0_g1_i1	AT2G37570.1 | Symbols: SLT1 | HSP20-like chaperones superfamily protein | chr2:15761466-15762950 REVERSE LENGTH=494	-0.968	-0.0806	-0.208	0.11	-0.789	-0.192	0.135	0.0148	-0.0966	-0.245	0.131	1	0.884	1	0.00699	0.905	0.923	1	1	0.756
TR2854|c1_g1_i3	AT3G58640.2 | Symbols: | Mitogen activated protein kinase kinase kinase-related | chr3:21687153-21692675 REVERSE LENGTH=809	1.39	0.325	0.245	-0.101	0.92	-0.345	0.0131	-0.107	-0.0676	-0.183	0.0764	1	0.89	1	0.0261	0.838	0.999	1	1	0.905
TR2856|c3_g4_i13	AT3G07040.1 | Symbols: RPM1, RPS3 | NB-ARC domain-containing disease resistance protein | chr3:2226244-2229024 REVERSE LENGTH=926	-0.241	-0.218	-0.432	0.883	-0.474	3.74	2.61	0.309	0.64	0.189	0.973	1	0.962	1	0.828	0.15	0.0499	1	1	0.978
TR2856|c3_g4_i5	AT3G14470.1 | Symbols: | NB-ARC domain-containing disease resistance protein | chr3:4857940-4861104 FORWARD LENGTH=1054	-5.36	-1.28	-0.966	-1.13	-1.98	2.87	1.21	-0.271	1.46	0.471	0.0315	0.903	0.842	0.815	0.319	0.375	0.689	1	0.564	0.922
TR2860|c1_g1_i4	AT1G66480.1 | Symbols: | plastid movement impaired 2 | chr1:24805770-24807405 REVERSE LENGTH=225	-3.14	-0.121	-0.806	-0.0372	-2.17	0.052	0.168	1.02	-0.513	-0.627	0.0538	1	0.753	1	0.0247	1	0.97	0.745	1	0.754
TR2861|c1_g1_i3	AT3G53130.1 | Symbols: LUT1, CYP97C1 | Cytochrome P450 superfamily protein | chr3:19692812-19695278 FORWARD LENGTH=539	1.85	0.56	0.39	0.405	0.498	0.553	-0.0576	-0.0837	0.365	0.33	0.0488	0.881	0.834	0.994	0.381	0.788	0.99	1	1	0.834
TR2864|c1_g2_i7	AT3G45070.1 | Symbols: | P-loop containing nucleoside triphosphate hydrolases superfamily protein | chr3:16486378-16487349 REVERSE LENGTH=323	-0.992	-0.542	0.452	-0.611	-0.292	-2.34	-1.91	-0.939	0.239	0.274	0.736	1	0.938	1	0.883	0.343	0.046	0.904	1	0.957
TR2880|c1_g1_i2	AT2G14720.2 | Symbols: VSR4, VSR2;1, BP80-2;1, MTV4 | vacuolar sorting receptor 4 | chr2:6300878-6304156 REVERSE LENGTH=628	-2.77	-0.666	-0.645	-0.234	-1.22	-1.12	-0.534	0.0323	-0.102	-0.513	0.00911	0.839	0.69	1	0.0605	0.526	0.69	1	1	0.726
TR2880|c2_g2_i5	AT2G14720.2 | Symbols: VSR4, VSR2;1, BP80-2;1, MTV4 | vacuolar sorting receptor 4 | chr2:6300878-6304156 REVERSE LENGTH=628	-1.64	-0.191	-0.426	-0.0202	-1	-0.889	-0.18	0.0599	-0.187	-0.582	0.0589	1	0.758	1	0.0263	0.513	0.931	1	1	0.446
TR2889|c0_g1_i1	AT1G27200.1 | Symbols: | Domain of unknown function (DUF23) | chr1:9449812-9451539 REVERSE LENGTH=575	-1.99	-0.373	-0.265	-0.357	-0.999	-0.84	-0.289	0.175	-0.555	-0.172	0.026	1	0.92	1	0.0342	0.593	0.865	1	0.802	0.933
TR2902|c6_g1_i3	AT5G54750.1 | Symbols: | Transport protein particle (TRAPP) component | chr5:22242080-22243477 FORWARD LENGTH=186	-0.764	-0.06	0.349	-0.0504	-1	-0.441	-0.197	-0.126	0.0241	-0.143	0.489	1	0.838	1	0.0185	0.82	0.924	1	1	0.946
TR2907|c1_g1_i4	AT5G04800.4 | Symbols: | Ribosomal S17 family protein | chr5:1389217-1389642 FORWARD LENGTH=141	-1.9	-0.641	-0.516	-0.47	-0.274	6.01	1.49	1.53	2.9	0.0799	0.56	1	0.95	1	0.899	0.00911	0.565	0.849	0.148	0.996
TR2922|c3_g2_i1	AT1G21280.1 | Symbols: | CONTAINS InterPro DOMAIN/s: Retrotransposon gag protein (InterPro:IPR005162); Has 707 Blast hits to 705 proteins in 25 species: Archae - 0; Bacteria - 0; Metazoa - 4; Fungi - 0; Plants - 703; Viruses - 0; Other Eukaryotes - 0 (source: NCBI BLink). | chr1:7447690-7448403 REVERSE LENGTH=237	2.94	1.11	0.409	-1.58	3	1.72	-0.366	0.284	0.788	1.01	0.1	0.812	0.94	0.368	0.000228	0.544	0.933	1	0.97	0.564
TR2922|c3_g2_i2	AT1G21280.1 | Symbols: | CONTAINS InterPro DOMAIN/s: Retrotransposon gag protein (InterPro:IPR005162); Has 707 Blast hits to 705 proteins in 25 species: Archae - 0; Bacteria - 0; Metazoa - 4; Fungi - 0; Plants - 703; Viruses - 0; Other Eukaryotes - 0 (source: NCBI BLink). | chr1:7447690-7448403 REVERSE LENGTH=237	3.41	1.3	0.398	-1.85	3.56	1.76	-0.505	0.499	0.902	0.867	0.0841	0.764	0.952	0.318	0.000109	0.594	0.904	1	0.96	0.729
TR2922|c3_g2_i3	AT1G21280.1 | Symbols: | CONTAINS InterPro DOMAIN/s: Retrotransposon gag protein (InterPro:IPR005162); Has 707 Blast hits to 705 proteins in 25 species: Archae - 0; Bacteria - 0; Metazoa - 4; Fungi - 0; Plants - 703; Viruses - 0; Other Eukaryotes - 0 (source: NCBI BLink). | chr1:7447690-7448403 REVERSE LENGTH=237	2.9	1.11	0.369	-1.58	3.01	1.66	-0.358	0.243	0.752	1.03	0.107	0.815	0.949	0.371	0.000229	0.568	0.936	1	0.986	0.559
TR2928|c0_g1_i3	AT4G34530.1 | Symbols: CIB1 | cryptochrome-interacting basic-helix-loop-helix 1 | chr4:16498466-16499946 FORWARD LENGTH=335	-1.27	0.205	-0.506	-0.624	-0.348	0.791	-0.75	0.466	-0.147	1.22	0.255	1	0.756	0.77	0.573	0.669	0.395	0.989	1	0.014
TR2928|c0_g1_i6	AT4G34530.1 | Symbols: CIB1 | cryptochrome-interacting basic-helix-loop-helix 1 | chr4:16498466-16499946 FORWARD LENGTH=335	-1.42	0.429	-0.37	-0.419	-1.06	0.551	-0.951	0.271	0.214	1.02	0.188	1	0.862	0.996	0.0237	0.801	0.173	1	1	0.0748
TR2928|c0_g1_i8	No informative hit E<10-6	-3.21	0.412	-1.1	-0.395	-2.13	1.52	0.000428	0.696	0.11	0.711	0.109	1	0.695	1	0.0281	0.635	1	1	1	0.775
TR2928|c0_g1_i9	AT4G34530.1 | Symbols: CIB1 | cryptochrome-interacting basic-helix-loop-helix 1 | chr4:16498466-16499946 FORWARD LENGTH=335	-0.672	0.268	-0.29	-0.449	-0.202	0.891	-0.73	0.223	0.241	1.16	0.637	1	0.919	0.983	0.785	0.624	0.435	1	1	0.0349
TR2935|c2_g1_i5	AT4G08170.2 | Symbols: | Inositol 1,3,4-trisphosphate 5/6-kinase family protein | chr4:5163707-5167000 REVERSE LENGTH=353	-3.36	-0.431	-1.02	-0.386	-1.52	0.819	0.22	-0.123	0.264	0.458	0.00922	1	0.496	1	0.0402	0.777	0.948	1	1	0.839
TR2941|c1_g2_i3	AT5G08450.3 | Symbols: | FUNCTIONS IN: molecular_function unknown; INVOLVED IN: biological_process unknown; LOCATED IN: cellular_component unknown; EXPRESSED IN: 25 plant structures; EXPRESSED DURING: 15 growth stages; CONTAINS InterPro DOMAIN/s: Histone deacetylation protein Rxt3 (InterPro:IPR013951); Has 34444 Blast hits to 20801 proteins in 1175 species: Archae - 64; Bacteria - 2390; Metazoa -…	-5.17	-1.64	-1.57	-0.551	-1.41	-0.908	-0.623	0.332	-0.695	0.0793	0.00186	0.301	0.348	1	0.248	0.818	0.805	1	0.999	0.995
TR2945|c1_g6_i2	AT4G37850.1 | Symbols: | basic helix-loop-helix (bHLH) DNA-binding superfamily protein | chr4:17796362-17797647 REVERSE LENGTH=328	5.38	1.33	-0.663	3.44	1.28	-2.44	0.63	-2.03	-0.892	-0.149	0.0454	0.952	0.934	0.133	0.422	0.585	0.915	0.645	1	0.989
TR2949|c1_g2_i1	AT5G11840.1 | Symbols: | Protein of unknown function (DUF1230) | chr5:3813610-3814805 REVERSE LENGTH=265	1.78	0.173	0.625	0.0281	0.958	1.49	0.59	0.266	-0.0373	0.674	0.0426	1	0.552	1	0.0288	0.168	0.507	1	1	0.358
TR2954|c4_g1_i3	AT3G59140.1 | Symbols: ATMRP14, MRP14, ABCC10 | multidrug resistance-associated protein 14 | chr3:21863519-21868701 REVERSE LENGTH=1453	1.72	0.83	0.118	1.05	-0.284	4.78	2.35	0.979	1.03	0.417	0.285	0.791	0.989	0.774	0.766	5.6e-06	2.84e-05	0.669	0.679	0.847
TR2954|c4_g1_i4	AT3G59140.1 | Symbols: ATMRP14, MRP14, ABCC10 | multidrug resistance-associated protein 14 | chr3:21863519-21868701 REVERSE LENGTH=1453	2.35	0.434	0.372	1.25	0.297	5.38	1.94	1.73	1.36	0.346	0.118	1	0.925	0.726	0.725	1.55e-06	0.000569	0.132	0.529	0.881
TR2954|c4_g1_i5	AT3G59140.1 | Symbols: ATMRP14, MRP14, ABCC10 | multidrug resistance-associated protein 14 | chr3:21863519-21868701 REVERSE LENGTH=1453	2	0.664	0.631	0.751	-0.0468	2.5	1.43	0.815	0.00474	0.25	0.0678	0.833	0.687	0.709	0.969	0.0189	0.00714	0.646	1	0.906
TR2954|c4_g1_i6	AT3G59140.1 | Symbols: ATMRP14, MRP14, ABCC10 | multidrug resistance-associated protein 14 | chr3:21863519-21868701 REVERSE LENGTH=1453	4.07	0.791	0.63	2.11	0.531	5.43	2.99	0.68	1.04	0.723	0.012	0.906	0.84	0.375	0.561	1.77e-05	2.05e-06	1	0.878	0.677
TR2954|c4_g1_i7	AT3G59140.1 | Symbols: ATMRP14, MRP14, ABCC10 | multidrug resistance-associated protein 14 | chr3:21863519-21868701 REVERSE LENGTH=1453	1.88	0.551	0.604	0.619	0.111	2.92	1.71	0.796	0.141	0.276	0.0558	0.891	0.65	0.835	0.895	0.000541	3.97e-05	0.575	1	0.875
TR2959|c0_g2_i2	AT3G20240.1 | Symbols: | Mitochondrial substrate carrier family protein | chr3:7057192-7058716 FORWARD LENGTH=348	-2.46	-0.312	-0.157	-0.416	-1.58	-0.681	-0.313	0.164	-0.183	-0.35	0.00291	1	0.958	0.948	0.00105	0.689	0.849	1	1	0.817
TR2961|c0_g1_i2	AT1G76570.1 | Symbols: | Chlorophyll A-B binding family protein | chr1:28729132-28730754 FORWARD LENGTH=327	1.81	0.497	0.491	0.21	0.61	0.859	0.0821	-0.105	0.547	0.335	0.0259	0.868	0.684	1	0.189	0.526	0.977	1	0.749	0.778
TR2961|c0_g1_i5	AT1G76570.1 | Symbols: | Chlorophyll A-B binding family protein | chr1:28729132-28730754 FORWARD LENGTH=327	2.18	0.349	0.0799	0.219	1.54	-0.102	-0.398	0.0134	0.173	0.109	0.155	1	0.995	1	0.0444	0.992	0.876	1	1	0.981
TR2970|c0_g2_i3	AT1G72370.2 | Symbols: P40, AP40, RP40, RPSAA | 40s ribosomal protein SA | chr1:27243148-27244842 REVERSE LENGTH=294	0.0722	0.468	-0.0651	-0.0749	-0.256	2.89	0.0955	0.866	1.35	0.585	0.992	1	0.996	1	0.797	0.0206	0.985	0.762	0.231	0.727
TR2972|c0_g1_i4	AT4G18465.1 | Symbols: | RNA helicase family protein | chr4:10197056-10201611 FORWARD LENGTH=695	1.38	0.246	0.349	-0.162	0.948	0.472	0.141	-0.265	0.268	0.328	0.0459	1	0.752	1	0.00426	0.734	0.937	1	1	0.717
TR2975|c0_g2_i5	AT5G18650.1 | Symbols: | CHY-type/CTCHY-type/RING-type Zinc finger protein | chr5:6218260-6220374 FORWARD LENGTH=267	1.3	-0.137	0.453	-0.00417	0.989	0.6	-0.517	0.353	0.225	0.539	0.23	1	0.809	1	0.0385	0.761	0.697	1	1	0.582
TR3687|c1_g1_i6	AT1G75460.1 | Symbols: | ATP-dependent protease La (LON) domain protein | chr1:28327986-28328822 FORWARD LENGTH=278	0.311	-0.357	0.427	0.104	0.137	2.15	0.809	0.643	-0.275	0.973	0.848	1	0.8	1	0.86	0.0155	0.219	0.735	1	0.0741
TR3689|c2_g1_i1	AT5G51010.1 | Symbols: | Rubredoxin-like superfamily protein | chr5:20744615-20745344 FORWARD LENGTH=154	2.04	0.944	0.518	0.113	0.467	1.56	0.303	0.515	0.39	0.349	0.0108	0.141	0.668	1	0.352	0.111	0.838	0.869	0.972	0.77
TR3689|c2_g1_i2	AT5G51010.1 | Symbols: | Rubredoxin-like superfamily protein | chr5:20744615-20745344 FORWARD LENGTH=154	2.61	0.819	0.812	0.306	0.671	1.73	0.645	0.378	0.305	0.401	0.000173	0.279	0.231	1	0.125	0.0418	0.33	0.995	1	0.69
TR3710|c4_g1_i4	No informative hit E<10-6	13.8	5.22	4.95	0.505	3.09	-0.303	-1.95	-0.606	1.83	0.418	0.0116	0.512	0.439	1	0.383	0.999	0.825	1	1	0.98
TR3711|c0_g1_i1	AT1G17060.1 | Symbols: CYP72C1, SOB7 | cytochrome p450 72c1 | chr1:5832282-5835255 REVERSE LENGTH=476	-0.232	2.4	-0.956	-1.27	-0.413	8.06	4.01	0.631	1.41	2.01	0.974	0.739	0.938	1	0.929	0.0223	0.155	1	0.987	0.58
TR3711|c0_g1_i11	AT1G17060.1 | Symbols: CYP72C1, SOB7 | cytochrome p450 72c1 | chr1:5832282-5835255 REVERSE LENGTH=476	1.28	0.575	0.439	0.872	-0.609	7.9	1.96	2.25	1.97	1.72	0.58	1	0.931	0.958	0.574	3.48e-08	0.0951	0.109	0.24	0.188
TR3711|c0_g1_i12	AT3G14690.1 | Symbols: CYP72A15 | cytochrome P450, family 72, subfamily A, polypeptide 15 | chr3:4937410-4939310 FORWARD LENGTH=512	0.89	0.19	0.559	0.486	-0.345	5.33	0.309	2.34	1.55	1.13	0.696	1	0.87	1	0.758	0.000104	0.94	0.0338	0.332	0.46
TR3711|c0_g1_i4	AT3G14690.1 | Symbols: CYP72A15 | cytochrome P450, family 72, subfamily A, polypeptide 15 | chr3:4937410-4939310 FORWARD LENGTH=512	1.11	0.148	0.314	0.888	-0.237	6.67	0.956	2.07	2.06	1.59	0.652	1	0.961	0.937	0.871	1.61e-06	0.645	0.12	0.158	0.191
TR3711|c0_g1_i7	AT3G14620.1 | Symbols: CYP72A8 | cytochrome P450, family 72, subfamily A, polypeptide 8 | chr3:4914978-4916853 FORWARD LENGTH=515	-0.0804	-0.848	-0.135	1.01	-0.103	8.63	1.89	1.99	3.83	0.911	1	1	0.994	0.983	0.965	4.57e-06	0.259	0.483	0.018	0.778
TR3711|c0_g1_i8	AT3G14620.1 | Symbols: CYP72A8 | cytochrome P450, family 72, subfamily A, polypeptide 8 | chr3:4914978-4916853 FORWARD LENGTH=515	0.804	-0.512	0.742	0.622	-0.0475	10.3	2.25	3.12	2.77	2.16	0.805	1	0.864	1	0.985	1.28e-09	0.0881	0.0257	0.172	0.112
TR3711|c0_g1_i9	AT3G14690.1 | Symbols: CYP72A15 | cytochrome P450, family 72, subfamily A, polypeptide 15 | chr3:4937410-4939310 FORWARD LENGTH=512	0.156	0.254	0.287	0.984	-1.37	8.58	1.72	2.02	3.19	1.65	0.971	1	0.956	0.748	0.0741	8.9e-15	0.0438	0.0323	6.26e-05	0.0564
TR3713|c2_g1_i9	AT5G43560.2 | Symbols: | TRAF-like superfamily protein | chr5:17501043-17505526 FORWARD LENGTH=1055	-3.64	-0.45	-1.6	-0.436	-1.15	-0.895	-0.875	0.0572	-0.118	0.0403	0.0284	1	0.367	1	0.286	0.79	0.52	1	1	0.998
TR3720|c0_g1_i2	AT2G25490.1 | Symbols: EBF1, FBL6 | EIN3-binding F box protein 1 | chr2:10848018-10850275 REVERSE LENGTH=628	-3.2	-0.351	-0.919	-0.386	-1.55	-0.819	-0.0533	0.196	-0.0181	-0.944	0.0275	1	0.689	1	0.0537	0.783	0.995	1	1	0.447
TR3721|c0_g1_i6	AT1G28530.1 | Symbols: | unknown protein; INVOLVED IN: biological_process unknown; LOCATED IN: chloroplast; EXPRESSED IN: 19 plant structures; EXPRESSED DURING: 10 growth stages; Has 20 Blast hits to 20 proteins in 6 species: Archae - 0; Bacteria - 0; Metazoa - 0; Fungi - 0; Plants - 20; Viruses - 0; Other Eukaryotes - 0 (source: NCBI BLink). | chr1:10032127-10035496 REVERSE LENGTH=614	0.881	-0.297	0.0582	-0.136	1.26	-0.349	-0.127	0.115	0.0728	-0.41	0.455	1	0.993	1	0.0254	0.87	0.959	1	1	0.747
TR3727|c2_g3_i5	No informative hit E<10-6	2.48	-0.284	1.79	-1.7	2.67	1.61	0.0768	-0.102	0.00515	1.63	0.355	1	0.478	0.56	0.0133	0.719	0.997	1	1	0.409
TR3729|c0_g2_i1	AT1G26800.1 | Symbols: | RING/U-box superfamily protein | chr1:9285576-9286190 REVERSE LENGTH=204	4.17	0.133	1.68	-0.0613	2.42	1.89	-1.18	0.785	0.553	1.73	0.0263	1	0.228	1	0.00466	0.592	0.608	1	1	0.126
TR3729|c0_g2_i2	AT1G26800.1 | Symbols: | RING/U-box superfamily protein | chr1:9285576-9286190 REVERSE LENGTH=204	2.79	-0.136	1.46	-0.115	1.58	3.23	-0.474	1.18	0.379	2.14	0.204	1	0.476	1	0.101	0.21	0.923	0.868	1	0.031
TR3729|c0_g2_i5	AT1G26800.1 | Symbols: | RING/U-box superfamily protein | chr1:9285576-9286190 REVERSE LENGTH=204	4.2	-0.158	1.51	-0.121	2.97	2.09	-1.82	0.668	0.48	2.76	0.0626	1	0.525	1	0.00778	0.608	0.356	1	1	0.00549
TR3729|c0_g2_i6	AT1G26800.1 | Symbols: | RING/U-box superfamily protein | chr1:9285576-9286190 REVERSE LENGTH=204	4.38	-0.619	2.27	0.519	2.22	2.09	-0.772	0.792	0.194	1.87	0.00919	1	0.0299	1	0.00528	0.49	0.833	0.994	1	0.0219
TR3731|c0_g2_i2	No informative hit E<10-6	-0.73	-0.155	-0.773	0.845	-0.646	-4.01	0.183	-1.34	-0.419	-2.44	0.876	1	0.915	1	0.682	0.104	0.981	0.89	1	0.0447
TR3731|c0_g2_i8	No informative hit E<10-6	-1.72	0.0131	-0.19	-0.913	-0.627	-3.75	-0.247	-1.36	0.296	-2.44	0.622	1	0.993	1	0.695	0.134	0.967	0.902	1	0.024
TR3733|c3_g3_i1	AT4G11820.2 | Symbols: MVA1, FKP1 | hydroxymethylglutaryl-CoA synthase / HMG-CoA synthase / 3-hydroxy-3-methylglutaryl coenzyme A synthase | chr4:7109124-7111901 REVERSE LENGTH=461	-0.656	0.0556	-0.0822	-0.0477	-0.581	-1.9	-0.374	-0.171	0.0651	-1.42	0.605	1	0.988	1	0.319	0.0245	0.76	1	1	9.66e-05
TR3733|c3_g3_i2	AT4G11820.2 | Symbols: MVA1, FKP1 | hydroxymethylglutaryl-CoA synthase / HMG-CoA synthase / 3-hydroxy-3-methylglutaryl coenzyme A synthase | chr4:7109124-7111901 REVERSE LENGTH=461	-2.15	-0.0498	-0.318	-0.453	-1.33	-0.995	-0.316	0.128	0.65	-1.46	0.0638	1	0.92	1	0.0332	0.598	0.883	1	0.826	0.00549
TR3733|c3_g4_i1	AT4G11820.2 | Symbols: MVA1, FKP1 | hydroxymethylglutaryl-CoA synthase / HMG-CoA synthase / 3-hydroxy-3-methylglutaryl coenzyme A synthase | chr4:7109124-7111901 REVERSE LENGTH=461	-0.657	0.156	0.0666	-0.164	-0.715	-3.37	-0.736	-0.665	0.246	-2.21	0.657	1	0.994	1	0.23	2.35e-05	0.361	0.807	1	2.35e-08
TR3734|c0_g1_i12	No informative hit E<10-6	1.78	-0.764	0.899	-0.69	2.33	-1.12	-0.121	0.233	-1.33	0.0959	0.563	1	0.853	1	0.0434	0.835	0.992	1	0.843	0.994
TR3734|c0_g1_i14	No informative hit E<10-6	1.95	0.242	0.869	-1.13	1.97	0.776	0.7	-0.0101	-0.404	0.49	0.39	1	0.795	0.815	0.0386	0.869	0.824	1	1	0.887
TR3734|c0_g1_i26	No informative hit E<10-6	2.43	0.811	-0.613	-0.247	2.48	1.15	0.308	0.585	-0.672	0.927	0.38	1	0.931	1	0.0204	0.84	0.967	1	1	0.789
TR3734|c0_g1_i6	No informative hit E<10-6	2.15	-0.315	1.56	-1.3	2.21	0.183	0.581	-0.138	-0.645	0.385	0.4	1	0.53	0.774	0.0268	0.988	0.915	1	1	0.938
TR3737|c0_g1_i1	AT3G23890.1 | Symbols: TOPII, ATTOPII | topoisomerase II | chr3:8624931-8631106 FORWARD LENGTH=1473	-3.16	-0.186	-1.06	0.126	-2.04	-3.58	-0.841	-0.454	-0.369	-1.91	0.119	1	0.537	1	0.19	0.0122	0.542	1	1	0.0541
TR3737|c0_g1_i3	AT3G23890.1 | Symbols: TOPII, ATTOPII | topoisomerase II | chr3:8624931-8631106 FORWARD LENGTH=1473	-2.6	-0.641	-0.61	-0.768	-0.578	-4.18	-0.863	-0.582	-0.663	-2.07	0.306	1	0.883	1	0.808	0.0174	0.683	1	1	0.106
TR3737|c0_g1_i4	AT3G23890.1 | Symbols: TOPII, ATTOPII | topoisomerase II | chr3:8624931-8631106 FORWARD LENGTH=1473	-0.588	-0.5	-0.79	-0.31	1.01	-3.48	-0.774	-0.721	-0.348	-1.64	0.869	1	0.731	1	0.545	0.0164	0.609	0.961	1	0.15
TR3745|c0_g1_i2	AT4G27670.1 | Symbols: HSP21 | heat shock protein 21 | chr4:13819048-13819895 REVERSE LENGTH=227	1.76	0.39	0.14	0.242	0.989	2.35	1.92	-0.152	-0.127	0.716	0.17	1	0.979	1	0.145	0.0588	0.000136	1	1	0.574
TR3751|c1_g2_i2	AT4G35220.1 | Symbols: | Cyclase family protein | chr4:16752636-16753966 FORWARD LENGTH=272	2.04	-0.444	0.326	-0.0195	2.18	0.926	0.251	0.0939	-0.33	0.912	0.222	1	0.947	1	0.00326	0.764	0.95	1	1	0.557
TR3766|c1_g2_i2	AT5G03520.1 | Symbols: ATRAB8C, ATRABE1D, ATRAB-E1D, RAB-E1D, RAB8C | RAB GTPase homolog 8C | chr5:883679-885158 FORWARD LENGTH=216	-1.81	-0.493	-0.135	-0.361	-0.821	-0.207	-0.372	-0.0168	-0.0533	0.236	0.0131	0.814	0.962	0.954	0.0467	0.927	0.706	1	1	0.865
TR3779|c0_g2_i1	AT1G49750.1 | Symbols: | Leucine-rich repeat (LRR) family protein | chr1:18411177-18412779 REVERSE LENGTH=494	-0.281	-0.136	0.107	-0.215	-0.0366	-0.566	-1.12	0.207	0.217	0.132	0.83	1	0.974	1	0.966	0.7	0.00144	1	1	0.942
TR3782|c0_g2_i7	AT1G03150.1 | Symbols: | Acyl-CoA N-acyltransferases (NAT) superfamily protein | chr1:756461-758441 FORWARD LENGTH=174	1.67	-0.0955	0.599	-0.149	1.31	0.79	0.074	-0.0331	-0.0531	0.803	0.261	1	0.807	1	0.0452	0.767	0.991	1	1	0.516
TR3821|c0_g1_i1	AT4G21320.1 | Symbols: HSA32 | Aldolase-type TIM barrel family protein | chr4:11340492-11341732 FORWARD LENGTH=286	2.55	0.882	-0.00273	0.0103	1.66	3.26	1.11	0.211	0.311	1.63	0.00497	0.432	1	1	0.00042	3.21e-05	0.0384	1	1	0.000242
TR3821|c0_g1_i2	AT4G21320.1 | Symbols: HSA32 | Aldolase-type TIM barrel family protein | chr4:11340492-11341732 FORWARD LENGTH=286	3.14	0.422	0.513	0.00537	2.2	2.64	1.06	0.272	0.178	1.12	0.00201	1	0.81	1	1.98e-05	0.00911	0.12	1	1	0.112
TR3830|c1_g2_i5	AT4G13010.1 | Symbols: | Oxidoreductase, zinc-binding dehydrogenase family protein | chr4:7600682-7602567 FORWARD LENGTH=329	1.85	0.526	0.753	0.447	0.12	2.5	1.43	1.02	-0.253	0.307	0.193	0.995	0.719	1	0.914	0.0757	0.0213	0.608	1	0.886
TR3838|c3_g1_i7	AT2G02560.2 | Symbols: CAND1, ATCAND1, ETA2, TIP120, HVE | cullin-associated and neddylation dissociated | chr2:690345-697342 FORWARD LENGTH=1217	-1.62	0.142	-0.254	-0.0997	-1.41	0.163	0.229	0.302	-0.269	-0.0986	0.182	1	0.938	1	0.0361	0.964	0.915	1	1	0.976
TR3848|c3_g1_i13	No informative hit E<10-6	3.28	1.43	0.987	0.225	0.644	4.41	-0.00215	0.703	1.08	2.62	0.0473	0.495	0.663	1	0.566	0.00369	1	1	0.736	0.00197
TR3848|c3_g1_i5	No informative hit E<10-6	3.01	1.41	1.33	0.185	0.097	4.69	1.05	0.993	0.972	1.68	0.0676	0.488	0.398	1	0.957	0.000807	0.546	0.823	0.793	0.145
TR3858|c0_g1_i1	No informative hit E<10-6	-3.24	-0.281	-1.02	-0.399	-1.54	-1.88	-0.62	0.508	-0.97	-0.798	0.00598	1	0.459	1	0.0147	0.273	0.72	1	0.595	0.527
TR3860|c1_g4_i1	AT2G46280.3 | Symbols: TRIP-1, TIF3I1 | TGF-beta receptor interacting protein 1 | chr2:19004179-19005393 REVERSE LENGTH=254	-1.79	-0.0737	-0.328	-0.237	-1.15	-0.351	-0.181	0.317	-0.154	-0.332	0.033	1	0.854	1	0.0073	0.869	0.931	1	1	0.79
TR3860|c1_g4_i2	AT2G46290.1 | Symbols: | Transducin/WD40 repeat-like superfamily protein | chr2:19005910-19007797 REVERSE LENGTH=355	-1.12	0.242	-0.259	-0.0556	-1.05	-0.345	-0.436	0.188	0.118	-0.215	0.327	1	0.924	1	0.04	0.89	0.737	1	1	0.911
TR3860|c1_g4_i4	AT2G46280.3 | Symbols: TRIP-1, TIF3I1 | TGF-beta receptor interacting protein 1 | chr2:19004179-19005393 REVERSE LENGTH=254	-2.06	-0.229	-0.42	-0.15	-1.26	-0.0634	-0.431	0.477	0.0277	-0.138	0.0295	1	0.812	1	0.0107	0.994	0.748	0.959	1	0.956
TR3872|c1_g1_i2	AT1G52190.1 | Symbols: | Major facilitator superfamily protein | chr1:19434671-19438673 FORWARD LENGTH=607	0.1	-0.0681	0.00407	0.0612	0.103	-2.38	-0.281	-0.471	-0.256	-1.37	0.977	1	1	1	0.919	0.0147	0.89	1	1	0.00512
TR3872|c1_g1_i3	AT1G52190.1 | Symbols: | Major facilitator superfamily protein | chr1:19434671-19438673 FORWARD LENGTH=607	-1.4	-0.372	-0.162	-0.961	0.0963	-1.05	0.345	0.212	-0.323	-1.28	0.284	1	0.974	0.447	0.935	0.567	0.856	1	1	0.033
TR3872|c1_g1_i6	AT1G52190.1 | Symbols: | Major facilitator superfamily protein | chr1:19434671-19438673 FORWARD LENGTH=607	-1.15	-0.532	-0.487	-0.0311	-0.0981	-1.95	0.176	-0.411	-0.393	-1.32	0.418	0.958	0.844	1	0.931	0.139	0.953	1	1	0.0289
TR3874|c1_g1_i2	AT4G22920.1 | Symbols: ATNYE1, NYE1 | non-yellowing 1 | chr4:12016776-12017969 REVERSE LENGTH=268	-2.04	-0.869	-0.505	0.656	-1.32	-1.78	0.53	-1.1	-0.197	-1.01	0.102	0.613	0.823	0.865	0.0433	0.23	0.741	0.334	1	0.235
TR3878|c1_g1_i13	AT3G57290.1 | Symbols: EIF3E, TIF3E1, ATEIF3E-1, INT-6, ATINT6, INT6 | eukaryotic translation initiation factor 3E | chr3:21196786-21199073 REVERSE LENGTH=441	-1.38	-0.0954	-0.345	0.144	-1.09	-0.612	-0.494	0.111	0.116	-0.345	0.218	1	0.874	1	0.0465	0.764	0.676	1	1	0.835
TR3878|c1_g1_i4	AT3G57290.1 | Symbols: EIF3E, TIF3E1, ATEIF3E-1, INT-6, ATINT6, INT6 | eukaryotic translation initiation factor 3E | chr3:21196786-21199073 REVERSE LENGTH=441	-1.87	0.00281	-0.589	-0.196	-1.09	-0.137	-0.195	0.389	-0.0223	-0.309	0.0429	1	0.586	1	0.0532	0.965	0.922	0.991	1	0.83
TR3882|c0_g1_i2	AT3G25070.1 | Symbols: RIN4 | RPM1 interacting protein 4 | chr3:9132458-9133747 FORWARD LENGTH=211	2.72	0.179	0.568	1.29	0.682	2.17	0.0324	0.763	0.452	0.92	0.0221	1	0.791	0.152	0.378	0.127	0.997	0.828	1	0.383
TR3894|c4_g2_i1	AT3G15430.2 | Symbols: | Regulator of chromosome condensation (RCC1) family protein | chr3:5209408-5211562 FORWARD LENGTH=488	-1.46	-0.426	0.488	-0.0647	-1.46	-0.749	-0.0318	-0.534	0.00106	-0.184	0.351	1	0.871	1	0.0294	0.765	0.997	1	1	0.951
TR3901|c4_g1_i5	AT2G21385.3 | Symbols: | unknown protein. | chr2:9149726-9151752 FORWARD LENGTH=334	3.2	-0.015	0.235	0.149	2.83	0.53	2.26	-2.62	0.447	0.446	0.359	1	0.99	1	0.0452	0.97	0.408	0.611	1	0.946
TR3904|c0_g2_i4	AT1G43710.1 | Symbols: emb1075 | Pyridoxal phosphate (PLP)-dependent transferases superfamily protein | chr1:16486534-16488298 REVERSE LENGTH=482	0.74	-0.428	-0.0562	-0.12	1.34	0.714	0.746	0.114	0.433	-0.579	0.702	1	0.998	1	0.037	0.802	0.598	1	1	0.727
TR3904|c0_g2_i6	AT1G43710.1 | Symbols: emb1075 | Pyridoxal phosphate (PLP)-dependent transferases superfamily protein | chr1:16486534-16488298 REVERSE LENGTH=482	0.833	0.0281	0.112	-0.558	1.25	0.447	0.686	-0.174	0.159	-0.224	0.643	1	0.989	0.994	0.0474	0.894	0.638	1	1	0.938
TR3910|c0_g1_i5	AT3G06010.1 | Symbols: ATCHR12 | Homeotic gene regulator | chr3:1802435-1807284 REVERSE LENGTH=1102	-3.65	-1.05	-1.05	-0.269	-1.29	-0.804	-0.652	0.327	-0.242	-0.237	0.00484	0.544	0.537	1	0.0929	0.776	0.69	1	1	0.938
TR3925|c1_g2_i3	AT3G18420.1 | Symbols: | Protein prenylyltransferase superfamily protein | chr3:6324771-6325721 REVERSE LENGTH=316	-1.81	-0.376	-0.254	0.0527	-1.23	0.0437	-0.302	0.182	0.156	0.00774	0.0499813	1	0.923	1	0.00528	1	0.859	1	1	1
TR3925|c1_g2_i5	AT3G18420.1 | Symbols: | Protein prenylyltransferase superfamily protein | chr3:6324771-6325721 REVERSE LENGTH=316	-2.12	-0.602	-0.383	-0.0774	-1.06	-0.553	-0.3	0.115	-0.115	-0.254	0.0164	0.796	0.835	1	0.0217	0.779	0.86	1	1	0.881
TR3925|c1_g2_i8	AT3G18420.1 | Symbols: | Protein prenylyltransferase superfamily protein | chr3:6324771-6325721 REVERSE LENGTH=316	-1.74	-0.17	-0.309	-0.42	-0.84	-0.972	-0.42	-0.155	-0.0986	-0.299	0.0387	1	0.87	0.952	0.0537	0.465	0.705	1	1	0.826
TR3928|c1_g1_i6	AT1G01630.1 | Symbols: | Sec14p-like phosphatidylinositol transfer family protein | chr1:229206-230675 FORWARD LENGTH=255	0.657	-0.117	-0.518	-0.0993	1.39	-0.0266	0.365	-0.694	0.165	0.137	0.726	1	0.829	1	0.0207	1	0.874	0.894	1	0.967
TR3930|c0_g1_i12	AT3G51830.1 | Symbols: ATG5, SAC8 | SAC domain-containing protein 8 | chr3:19220237-19225092 FORWARD LENGTH=588	1.43	0.157	0.288	0.169	0.821	0.885	0.114	0.142	0.122	0.508	0.0387	1	0.834	1	0.023	0.406	0.956	1	1	0.443
TR3932|c0_g1_i2	AT5G06610.1 | Symbols: | Protein of unknown function (DUF620) | chr5:2029953-2033620 FORWARD LENGTH=368	-1.39	-0.0467	-0.0664	-0.638	-0.64	-1.5	-1	-0.0994	-0.198	-0.201	0.108	1	0.99	0.448	0.165	0.109	0.0303	1	1	0.903
TR3932|c0_g1_i6	AT5G06610.1 | Symbols: | Protein of unknown function (DUF620) | chr5:2029953-2033620 FORWARD LENGTH=368	-1.25	-0.129	-0.133	-0.578	-0.406	-1.75	-1.18	-0.199	-0.0881	-0.278	0.165	1	0.968	0.555	0.437	0.0335	0.00257	1	1	0.849
TR3938|c1_g1_i2	AT4G00660.1 | Symbols: RH8, ATRH8 | RNAhelicase-like 8 | chr4:274638-277438 FORWARD LENGTH=505	-2.78	-0.376	-0.509	-0.551	-1.34	0.47	-0.136	0.544	-0.0267	0.0883	0.032	1	0.831	1	0.1	0.873	0.97	0.983	1	0.982
TR3944|c0_g1_i1	AT1G02990.3 | Symbols: | FUNCTIONS IN: molecular_function unknown; INVOLVED IN: biological_process unknown; LOCATED IN: cellular_component unknown; BEST Arabidopsis thaliana protein match is: CW-type Zinc Finger (TAIR:AT3G62900.1). | chr1:681724-686996 REVERSE LENGTH=1278	-3.3	-0.587	-1.54	-0.108	-1.06	-0.843	-0.558	0.0779	-0.349	-0.0143	0.0109	0.988	0.13	1	0.215	0.756	0.771	1	1	1
TR3959|c0_g2_i3	AT1G54710.1 | Symbols: ATATG18H, ATG18H | homolog of yeast autophagy 18 (ATG18) H | chr1:20417019-20420733 REVERSE LENGTH=927	-1.8	-0.373	-0.0264	0.95	-2.35	-0.343	-0.00301	-0.116	-0.0418	-0.182	0.435	1	1	0.856	0.0436	0.947	1	1	1	0.969
TR3990|c1_g1_i2	AT5G20940.1 | Symbols: | Glycosyl hydrolase family protein | chr5:7104076-7106653 REVERSE LENGTH=626	-0.732	0.35	0.673	0.04	-1.79	-0.256	-0.0438	0.104	-0.186	-0.131	0.773	1	0.81	1	0.0467	0.964	0.997	1	1	0.981
TR3996|c2_g1_i1	AT5G17170.1 | Symbols: ENH1 | rubredoxin family protein | chr5:5649335-5650975 FORWARD LENGTH=271	1.73	0.562	0.573	0.0602	0.53	0.857	0.112	0.15	0.41	0.186	0.0362	0.764	0.586	1	0.262	0.533	0.965	1	0.949	0.913
TR3996|c2_g1_i2	AT5G17170.1 | Symbols: ENH1 | rubredoxin family protein | chr5:5649335-5650975 FORWARD LENGTH=271	1.79	0.613	0.609	0.236	0.333	0.696	0.286	0.115	0.134	0.16	0.0283	0.678	0.534	1	0.535	0.651	0.849	1	1	0.932
TR3999|c2_g1_i6	AT5G55590.1 | Symbols: QRT1 | Pectin lyase-like superfamily protein | chr5:22519911-22521699 FORWARD LENGTH=380	2.16	0.321	0.734	-0.466	1.57	0.482	1.03	-0.272	-0.483	0.209	0.141	1	0.731	1	0.0213	0.894	0.359	1	1	0.95
TR4007|c3_g2_i2	No informative hit E<10-6	-4.5	-1.37	-1.56	-0.644	-0.931	-2.48	0.268	-1.24	-1.34	-0.168	0.00038	0.368	0.246	0.984	0.24	0.179	0.949	0.56	0.367	0.967
TR4007|c3_g3_i4	No informative hit E<10-6	-5.83	-1.16	-1.87	-0.614	-2.19	-3.38	0.672	-1.14	-1.77	-1.14	3.68e-06	0.642	0.16	1	0.00265	0.0289	0.78	0.677	0.106	0.363
TR4011|c2_g2_i4	AT5G63710.1 | Symbols: | Leucine-rich repeat protein kinase family protein | chr5:25499475-25502598 FORWARD LENGTH=614	-1.46	-0.582	-0.492	-0.156	-0.233	-0.115	-0.0395	0.0853	-0.262	0.101	0.0385	0.586	0.6	1	0.623	0.965	0.992	1	1	0.954
TR4025|c2_g4_i1	No informative hit E<10-6	0.73	-0.305	-0.172	-0.446	1.65	1.04	0.034	0.757	-0.0703	0.323	0.748	1	0.982	1	0.0159	0.696	0.997	0.961	1	0.909
TR4025|c2_g8_i1	No informative hit E<10-6	1.55	0.164	0.0164	-0.101	1.47	-0.00877	-0.203	0.186	0.116	-0.108	0.26	1	1	1	0.0111	1	0.95	1	1	0.978
TR4025|c2_g8_i2	No informative hit E<10-6	1.54	0.0811	0.465	-0.562	1.56	0.991	-0.14	0.4	0.0816	0.649	0.383	1	0.901	1	0.0247	0.729	0.978	1	1	0.735
TR4026|c3_g1_i2	AT5G14760.1 | Symbols: AO | L-aspartate oxidase | chr5:4769133-4772012 FORWARD LENGTH=651	0.385	1.04	-0.369	-0.117	-0.172	0.487	1.36	-0.927	0.0583	-0.00428	0.842	0.328	0.901	1	0.844	0.861	0.0167	0.605	1	1
TR4029|c2_g2_i1	AT1G11720.2 | Symbols: SS3 | starch synthase 3 | chr1:3951597-3956840 FORWARD LENGTH=1094	1.27	0.266	0.459	-0.221	0.767	0.204	0.147	-0.0675	0.0543	0.0697	0.111	1	0.668	1	0.0435	0.928	0.94	1	1	0.976
TR4042|c3_g3_i9	AT3G16630.2 | Symbols: ATKINESIN-13A, KINESIN-13A | P-loop containing nucleoside triphosphate hydrolases superfamily protein | chr3:5662660-5667261 REVERSE LENGTH=794	-1.64	-0.253	-0.543	0.32	-1.16	-0.18	-0.245	-0.0511	-0.0522	0.168	0.0881	1	0.669	1	0.02	0.95	0.892	1	1	0.936
TR4044|c1_g3_i1	AT5G04870.1 | Symbols: CPK1, ATCPK1 | calcium dependent protein kinase 1 | chr5:1417015-1419877 REVERSE LENGTH=610	-1.84	-0.233	-0.0628	0.117	-1.66	-0.515	-0.301	-0.0774	0.0274	-0.164	0.0925	1	0.992	1	0.0184	0.786	0.835	1	1	0.947
TR4050|c6_g1_i6	AT5G64440.1 | Symbols: AtFAAH, FAAH | fatty acid amide hydrolase | chr5:25766229-25770260 FORWARD LENGTH=607	1.09	-0.403	0.241	0.0188	1.23	-2.91	-0.734	-0.988	-0.477	-0.717	0.565	1	0.962	1	0.0822	0.0277	0.639	0.648	1	0.63
TR4065|c3_g3_i4	AT4G26900.1 | Symbols: AT-HF, HISN4 | HIS HF | chr4:13515514-13519608 FORWARD LENGTH=592	-1.74	-0.0918	-0.455	-0.299	-0.893	0.00176	0.0356	0.409	-0.0661	-0.377	0.0457	1	0.726	1	0.0838	1	0.994	0.966	1	0.754
TR4070|c3_g1_i4	AT5G62220.1 | Symbols: ATGT18, GT18 | glycosyltransferase 18 | chr5:24988456-24990009 REVERSE LENGTH=517	0.00721	-0.344	0.3	-0.0391	0.0898	-1.66	-0.0601	-0.412	-0.69	-0.497	1	1	0.868	1	0.903	0.0486	0.986	0.961	0.423	0.533
TR4073|c2_g2_i2	AT5G04720.1 | Symbols: ADR1-L2 | ADR1-like 2 | chr5:1360748-1363665 FORWARD LENGTH=811	-4.62	-0.581	-1.66	-0.529	-1.85	-2.36	-0.702	0.734	-1.23	-1.16	0.00037	1	0.168	1	0.0256	0.218	0.736	0.97	0.464	0.347
TR4079|c3_g1_i1	AT5G51010.1 | Symbols: | Rubredoxin-like superfamily protein | chr5:20744615-20745344 FORWARD LENGTH=154	4.64	2.08	0.0397	0.531	1.99	3.34	-0.243	1.28	0.769	1.53	0.0417	0.45	1	1	0.0934	0.168	0.969	0.823	1	0.341
TR4079|c3_g1_i9	AT5G51010.1 | Symbols: | Rubredoxin-like superfamily protein | chr5:20744615-20745344 FORWARD LENGTH=154	5.89	1.4	1.81	0.751	1.94	1.4	-0.821	0.324	0.73	1.17	0.034	0.989	0.681	1	0.164	0.782	0.849	1	1	0.678
TR4084|c3_g2_i1	AT1G71820.1 | Symbols: SEC6 | SEC6 | chr1:27010022-27016745 FORWARD LENGTH=752	-2.67	-0.327	0.0925	-0.666	-1.77	-1.19	-0.237	-0.406	-0.103	-0.443	0.0599	1	0.993	0.948	0.0208	0.63	0.948	1	1	0.857
TR4091|c1_g1_i2	AT5G54580.1 | Symbols: | RNA-binding (RRM/RBD/RNP motifs) family protein | chr5:22171332-22172656 FORWARD LENGTH=156	0.434	0.156	-0.0379	0.358	-0.0422	1.87	0.838	0.604	0.0569	0.367	0.711	1	0.997	0.974	0.96	0.0104	0.0587	0.597	1	0.712
TR4092|c1_g1_i1	AT2G34040.2 | Symbols: | Apoptosis inhibitory protein 5 (API5) | chr2:14378571-14382246 REVERSE LENGTH=442	-2.07	-0.273	-0.159	-0.263	-1.37	-0.434	-0.266	0.429	-0.24	-0.356	0.0334	1	0.966	1	0.00874	0.847	0.884	0.991	1	0.813
TR4094|c0_g1_i6	AT2G23620.1 | Symbols: ATMES1, MES1 | methyl esterase 1 | chr2:10047462-10049248 REVERSE LENGTH=263	0.872	-0.413	-0.825	0.598	1.51	2.41	0.278	-0.23	0.0424	2.32	0.787	1	0.809	1	0.147	0.41	0.964	1	1	0.0377
TR4100|c0_g3_i1	AT5G58490.1 | Symbols: | NAD(P)-binding Rossmann-fold superfamily protein | chr5:23643068-23644455 FORWARD LENGTH=324	2.55	0.291	0.613	0.589	1.06	-0.104	-0.244	-0.229	-0.014	0.383	0.0142	1	0.714	0.898	0.0661	0.985	0.926	1	1	0.826
TR4101|c2_g1_i1	AT3G51240.1 | Symbols: F3H, TT6, F3'H | flavanone 3-hydroxylase | chr3:19025409-19026658 FORWARD LENGTH=358	1.78	0.382	0.387	0.515	0.495	-0.308	0.625	-0.495	0.0189	-0.457	0.0336	0.992	0.805	0.815	0.328	0.89	0.368	0.889	1	0.632
TR4107|c1_g2_i1	AT3G08530.1 | Symbols: | Clathrin, heavy chain | chr3:2587171-2595411 REVERSE LENGTH=1703	-4.55	-0.903	-1.82	-0.49	-1.34	-2.33	-1.09	-0.0968	-0.693	-0.454	0.0194	0.943	0.243	1	0.391	0.368	0.519	1	1	0.903
TR4107|c1_g2_i4	AT3G11130.1 | Symbols: | Clathrin, heavy chain | chr3:3482575-3491667 REVERSE LENGTH=1705	-4.94	-0.881	-1.41	-0.751	-1.9	-1.78	-0.627	-0.184	-0.732	-0.24	0.000621	0.872	0.344	0.954	0.0698	0.453	0.778	1	0.957	0.953
TR4113|c3_g1_i9	AT5G13410.1 | Symbols: | FKBP-like peptidyl-prolyl cis-trans isomerase family protein | chr5:4299830-4301706 REVERSE LENGTH=256	0.83	0.0406	0.233	-0.0965	0.653	0.985	0.29	0.319	0.00299	0.373	0.231	1	0.86	1	0.036	0.204	0.735	0.952	1	0.554
TR4120|c4_g3_i11	AT3G59140.1 | Symbols: ATMRP14, MRP14, ABCC10 | multidrug resistance-associated protein 14 | chr3:21863519-21868701 REVERSE LENGTH=1453	4.7	0.498	0.266	1.48	2.45	-0.0417	-0.32	-0.354	0.913	-0.28	0.0382	1	0.971	0.802	0.105	1	0.948	1	0.953	0.968
TR4120|c4_g3_i8	AT3G59140.1 | Symbols: ATMRP14, MRP14, ABCC10 | multidrug resistance-associated protein 14 | chr3:21863519-21868701 REVERSE LENGTH=1453	4.81	0.593	0.409	-0.156	3.96	0.816	0.142	-0.0778	-0.538	1.29	0.0398	1	0.928	1	0.0109	0.855	0.982	1	1	0.632
TR4121|c0_g1_i2	AT3G59910.1 | Symbols: | Ankyrin repeat family protein | chr3:22130779-22133033 REVERSE LENGTH=611	-2.7	-0.643	-0.525	-0.119	-1.42	-1.14	-0.397	0.197	-0.521	-0.415	0.0116	0.829	0.798	1	0.0311	0.48	0.799	1	0.911	0.799
TR4123|c0_g1_i6	AT1G26750.1 | Symbols: | unknown protein; Has 44 Blast hits to 44 proteins in 16 species: Archae - 0; Bacteria - 0; Metazoa - 0; Fungi - 0; Plants - 44; Viruses - 0; Other Eukaryotes - 0 (source: NCBI BLink). | chr1:9246857-9248053 FORWARD LENGTH=195	2.78	-0.227	0.489	0.344	2.18	0.783	-0.968	0.82	0.584	0.347	0.0896	1	0.899	1	0.00568	0.822	0.543	0.939	1	0.911
TR4156|c0_g3_i1	AT5G47770.1 | Symbols: FPS1 | farnesyl diphosphate synthase 1 | chr5:19345297-19347415 FORWARD LENGTH=384	-0.249	-0.531	0.0975	0.508	-0.324	-3.59	-0.151	-1.7	-0.307	-1.43	0.936	1	0.993	1	0.742	0.00411	0.973	0.105	1	0.0668
TR4156|c0_g3_i3	AT5G47770.1 | Symbols: FPS1 | farnesyl diphosphate synthase 1 | chr5:19345297-19347415 FORWARD LENGTH=384	0.00469	-0.0239	-0.073	0.186	-0.0843	-3.73	-0.556	-1.09	-0.281	-1.8	1	1	0.993	1	0.931	1.55e-06	0.632	0.172	1	1.54e-05
TR4156|c0_g3_i5	AT5G47770.1 | Symbols: FPS1 | farnesyl diphosphate synthase 1 | chr5:19345297-19347415 FORWARD LENGTH=384	-0.543	-0.475	-0.178	0.361	-0.252	-0.738	0.801	-0.605	0.762	-1.7	0.807	1	0.977	1	0.805	0.801	0.554	0.999	0.878	0.0083
TR4164|c1_g3_i1	AT2G41380.1 | Symbols: | S-adenosyl-L-methionine-dependent methyltransferases superfamily protein | chr2:17251981-17252886 FORWARD LENGTH=269	2.99	0.832	1.1	0.503	0.554	4.91	1.96	1	0.929	1.02	0.000579	0.512	0.158	0.948	0.351	3.32e-11	3.94e-06	0.322	0.365	0.109
TR4196|c0_g1_i1	AT5G19040.1 | Symbols: ATIPT5, IPT5 | isopentenyltransferase 5 | chr5:6362389-6363381 REVERSE LENGTH=330	-11.8	-1.17	-3.1	-0.887	-6.68	-1.72	-0.507	0.158	-2.05	0.675	0.04	1	0.73	1	0.0835	0.893	0.977	1	0.999	0.957
TR4197|c1_g2_i4	AT3G07810.1 | Symbols: | RNA-binding (RRM/RBD/RNP motifs) family protein | chr3:2492875-2495052 FORWARD LENGTH=494	1.84	0.606	0.509	-0.101	0.828	-0.0841	0.195	-0.105	-0.124	-0.0505	0.0252	0.717	0.683	1	0.0516	0.984	0.924	1	1	0.988
TR4198|c2_g1_i1	AT1G78955.1 | Symbols: CAMS1 | camelliol C synthase 1 | chr1:29689153-29694255 REVERSE LENGTH=769	-0.484	-0.149	-0.531	0.775	-0.578	-3.84	-0.0774	-1.45	-0.456	-1.85	0.858	1	0.878	0.943	0.556	0.00543	0.992	0.354	1	0.0206
TR4228|c0_g1_i1	AT2G17030.1 | Symbols: | F-box family protein with a domain of unknown function (DUF295) | chr2:7399108-7400650 FORWARD LENGTH=407	2.79	1.31	2.68	0.166	-1.36	8.31	0.85	1.6	2.51	3.34	0.519	1	0.436	1	0.555	0.00438	0.899	0.97	0.494	0.12
TR4228|c0_g1_i2	AT2G17030.1 | Symbols: | F-box family protein with a domain of unknown function (DUF295) | chr2:7399108-7400650 FORWARD LENGTH=407	7.42	1.05	3.65	1.84	0.884	6.76	1.37	0.445	2.66	2.28	0.00128	1	0.0555	0.619	0.616	0.00234	0.632	1	0.21	0.188
TR4242|c1_g1_i1	AT5G07850.1 | Symbols: | HXXXD-type acyl-transferase family protein | chr5:2508917-2510503 FORWARD LENGTH=456	3.71	1.86	-0.427	-1.08	3.36	-4.38	-3.96	0.0831	-0.614	0.108	0.407	0.932	0.975	1	0.0997	0.347	0.048	1	1	0.996
TR4358|c2_g2_i1	No informative hit E<10-6	0.357	0.386	-0.136	-0.403	0.51	1.95	0.173	0.338	0.37	1.07	0.815	1	0.972	0.988	0.333	0.0363	0.942	1	1	0.0291
TR4365|c2_g1_i6	AT1G29390.1 | Symbols: COR314-TM2, COR413IM2 | cold regulated 314 thylakoid membrane 2 | chr1:10286409-10287878 REVERSE LENGTH=226	-0.912	-0.108	-0.533	-0.0968	-0.174	-1.99	0.346	-0.933	-0.371	-1.04	0.388	1	0.662	1	0.803	0.0193	0.791	0.232	0.987	0.0291
TR4367|c1_g2_i1	AT4G32300.1 | Symbols: SD2-5 | S-domain-2 5 | chr4:15599970-15602435 FORWARD LENGTH=821	-2.57	-0.66	-0.625	-0.596	-0.688	-0.722	-0.108	0.228	-0.295	-0.546	0.03	0.936	0.771	0.894	0.348	0.766	0.981	1	1	0.707
TR4371|c0_g1_i2	AT5G62020.1 | Symbols: AT-HSFB2A, HSFB2A | heat shock transcription factor B2A | chr5:24916212-24917194 FORWARD LENGTH=299	3.89	0.575	1.04	0.829	1.44	0.408	0.255	0.592	-1.29	0.851	0.00746	1	0.382	0.952	0.11	0.928	0.942	0.968	0.533	0.622
TR4373|c5_g3_i1	AT5G12860.2 | Symbols: DiT1 | dicarboxylate transporter 1 | chr5:4059850-4061919 REVERSE LENGTH=556	-2.01	-0.0445	-0.625	0.0667	-1.41	-1.13	-0.0417	-0.0118	-0.406	-0.675	0.0939	1	0.73	1	0.0122	0.559	0.996	1	1	0.571
TR4374|c2_g1_i15	No informative hit E<10-6	-3.3	0.00485	0.135	-0.499	-2.94	-1.38	-0.676	-0.259	-0.557	0.111	0.146	1	0.993	1	0.0163	0.71	0.835	1	1	0.989
TR4376|c2_g1_i8	AT3G25230.1 | Symbols: ROF1, ATFKBP62, FKBP62 | rotamase FKBP 1 | chr3:9188257-9191137 FORWARD LENGTH=551	2.12	0.274	0.732	-0.166	1.28	0.939	-0.154	0.673	-0.174	0.595	0.109	1	0.704	1	0.0453	0.693	0.969	0.937	1	0.702
TR4379|c4_g2_i1	AT1G58390.1 | Symbols: | Disease resistance protein (CC-NBS-LRR class) family | chr1:21690962-21693891 REVERSE LENGTH=907	-2.14	0.00143	-1.64	-0.2	-0.297	2.27	0.224	1.12	0.421	0.508	0.093	1	0.017	1	0.759	0.11	0.945	0.405	1	0.791
TR4386|c2_g1_i4	AT5G63180.1 | Symbols: | Pectin lyase-like superfamily protein | chr5:25341106-25343113 REVERSE LENGTH=432	0.586	-0.171	-0.489	1.97	-0.728	-1.71	-0.456	-0.226	-0.113	-0.919	0.805	1	0.89	0.0299	0.404	0.44	0.862	1	1	0.501
TR4389|c0_g4_i1	AT2G20360.1 | Symbols: | NAD(P)-binding Rossmann-fold superfamily protein | chr2:8786070-8789098 FORWARD LENGTH=402	-0.992	-0.198	-0.0291	0.122	-0.887	-0.368	-0.134	0.0516	-0.165	-0.121	0.256	1	0.999	1	0.0212	0.837	0.948	1	1	0.949
TR4390|c0_g1_i8	No informative hit E<10-6	3.93	1.6	1.29	0.467	0.575	1.56	-0.00653	0.166	0.729	0.667	0.0241	0.57	0.534	1	0.625	0.632	1	1	0.981	0.817
TR4411|c3_g1_i1	AT4G17090.1 | Symbols: CT-BMY, BAM3, BMY8 | chloroplast beta-amylase | chr4:9605266-9607250 REVERSE LENGTH=548	1.74	-0.0999	0.928	0.411	0.504	2.73	-0.0448	1.32	-0.0873	1.54	0.0125	1	0.0561	0.884	0.219	1.63e-06	0.99	0.00026	1	1.29e-07
TR4411|c3_g1_i3	AT4G17090.1 | Symbols: CT-BMY, BAM3, BMY8 | chloroplast beta-amylase | chr4:9605266-9607250 REVERSE LENGTH=548	1.55	-0.167	0.876	0.437	0.405	2.7	-0.0379	1.28	-0.0807	1.54	0.0345	1	0.0974	0.84	0.357	3.09e-06	0.992	0.000512	1	1.62e-07
TR4413|c0_g1_i2	AT2G47590.1 | Symbols: PHR2 | photolyase/blue-light receptor 2 | chr2:19521888-19523732 FORWARD LENGTH=447	-1.97	-0.355	-0.289	0.0436	-1.37	0.521	0.324	0.337	-0.0684	-0.0713	0.0339	1	0.896	1	0.00827	0.79	0.831	1	1	0.981
TR4417|c1_g2_i2	AT3G51950.2 | Symbols: | Zinc finger (CCCH-type) family protein / RNA recognition motif (RRM)-containing protein | chr3:19278244-19280407 REVERSE LENGTH=540	-2.46	-0.214	-0.863	-0.0376	-1.34	0.185	0.2	0.137	-0.19	0.0384	0.0505	1	0.589	1	0.0372	0.968	0.953	1	1	0.997
TR4430|c2_g1_i3	AT2G45590.1 | Symbols: | Protein kinase superfamily protein | chr2:18786725-18788776 FORWARD LENGTH=683	-1.38	-0.0741	-0.413	-0.495	-0.396	-2.27	-0.548	-0.428	-0.161	-1.13	0.233	1	0.856	0.939	0.562	0.0183	0.613	1	1	0.0513
TR4432|c3_g4_i1	AT2G27090.1 | Symbols: | Protein of unknown function (DUF630 and DUF632) | chr2:11567691-11570345 REVERSE LENGTH=743	-1.93	0.0291	-0.619	-0.0881	-1.25	-1.09	-0.218	-0.157	0.0332	-0.748	0.062	1	0.646	1	0.0284	0.47	0.918	1	1	0.376
TR4444|c2_g1_i1	AT1G10760.1 | Symbols: SEX1, SOP1, SOP, GWD1, GWD | Pyruvate phosphate dikinase, PEP/pyruvate binding domain | chr1:3581210-3590043 REVERSE LENGTH=1399	-3.15	-1.12	-0.594	-0.0234	-1.41	-2.72	-0.548	-0.205	-0.411	-1.56	0.00608	0.263	0.726	1	0.0962	0.0124	0.703	1	1	0.0234
TR4447|c0_g3_i1	AT1G14390.1 | Symbols: | Leucine-rich repeat protein kinase family protein | chr1:4924277-4926794 FORWARD LENGTH=747	-3.17	-0.715	-0.692	-0.966	-0.799	-2.02	-0.689	-0.135	-0.565	-0.627	0.0255	0.949	0.795	0.698	0.397	0.278	0.697	1	0.992	0.73
TR4450|c0_g3_i1	AT3G62700.1 | Symbols: ATMRP10, MRP10, ABCC14 | multidrug resistance-associated protein 10 | chr3:23190428-23195727 REVERSE LENGTH=1539	0.0109	-0.113	-0.106	0.499	-0.269	-2.15	-0.206	-0.699	0.403	-1.64	1	1	0.987	0.991	0.745	0.0842	0.945	0.849	1	0.00138
TR5124|c1_g3_i1	No informative hit E<10-6	1.64	0.18	0.351	0.0786	1.03	0.815	0.533	-0.0464	0.211	0.117	0.0896	1	0.868	1	0.0267	0.619	0.6	1	1	0.963
TR5128|c2_g1_i3	AT3G11450.1 | Symbols: | DnaJ domain ;Myb-like DNA-binding domain | chr3:3605459-3607402 REVERSE LENGTH=647	-1.56	-0.305	-0.412	-0.0604	-0.785	-0.187	-0.473	0.177	0.186	-0.0762	0.0116	0.979	0.641	1	0.0212	0.92	0.376	1	1	0.967
TR5137|c1_g6_i1	AT1G01180.1 | Symbols: | S-adenosyl-L-methionine-dependent methyltransferases superfamily protein | chr1:75633-76556 FORWARD LENGTH=307	-3.93	0.317	-0.00066	-0.762	-3.49	-2.61	-1.07	0.0214	-0.46	-1.11	0.142	1	1	1	0.0137	0.438	0.702	1	1	0.692
TR5141|c0_g1_i1	AT5G27970.1 | Symbols: | ARM repeat superfamily protein | chr5:10004720-10015429 FORWARD LENGTH=1630	-2.58	-0.324	-0.904	-0.179	-1.17	-0.573	-0.512	0.199	-0.348	0.0878	0.0348	1	0.489	1	0.15	0.824	0.733	1	1	0.982
TR5149|c2_g1_i2	AT1G52500.2 | Symbols: FPG-1, ATFPG-1, ATMMH-1, MMH-1 | MUTM homolog-1 | chr1:19560043-19562855 FORWARD LENGTH=390	-2.4	-0.883	-0.396	-0.165	-0.954	0.551	0.343	0.596	0.223	-0.611	0.00898	0.311	0.81	1	0.126	0.761	0.781	0.727	1	0.493
TR5149|c2_g1_i3	AT1G52500.2 | Symbols: FPG-1, ATFPG-1, ATMMH-1, MMH-1 | MUTM homolog-1 | chr1:19560043-19562855 FORWARD LENGTH=390	-3.47	-1.49	-0.185	-0.808	-0.987	0.372	-0.0984	0.668	0.105	-0.301	0.00493	0.0907	0.972	0.709	0.29	0.911	0.981	0.91	1	0.909
TR5152|c0_g1_i5	AT1G23460.1 | Symbols: | Pectin lyase-like superfamily protein | chr1:8327382-8329622 FORWARD LENGTH=460	3.93	0.556	0.721	0.449	2.2	2.28	0.647	-0.601	0.638	1.6	0.0353	1	0.829	1	0.0611	0.414	0.856	1	1	0.275
TR5153|c1_g1_i5	AT2G21370.2 | Symbols: XK-1, XK1 | xylulose kinase-1 | chr2:9137582-9139573 REVERSE LENGTH=385	0.613	-0.185	0.00251	-0.313	1.11	0.332	0.62	-0.303	-0.114	0.129	0.717	1	1	1	0.049	0.913	0.629	1	1	0.965
TR5156|c1_g1_i6	AT3G20050.1 | Symbols: ATTCP-1, TCP-1 | T-complex protein 1 alpha subunit | chr3:6998544-7002266 REVERSE LENGTH=545	-0.538	0.186	-0.121	0.00598	-0.609	0.00975	-0.0738	0.128	0.0969	-0.141	0.457	1	0.949	1	0.0446	1	0.965	1	1	0.899
TR5156|c1_g1_i8	AT3G20050.1 | Symbols: ATTCP-1, TCP-1 | T-complex protein 1 alpha subunit | chr3:6998544-7002266 REVERSE LENGTH=545	-0.766	0.141	-0.138	-0.0218	-0.748	-0.127	-0.111	0.144	-0.00539	-0.154	0.347	1	0.953	1	0.0347	0.956	0.951	1	1	0.909
TR5161|c1_g2_i1	AT4G21705.1 | Symbols: | Tetratricopeptide repeat (TPR)-like superfamily protein | chr4:11533257-11534817 REVERSE LENGTH=492	-2.82	-0.542	-0.727	0.466	-2.01	1.37	0.231	0.154	0.794	0.194	0.0447	1	0.704	1	0.0164	0.506	0.945	1	0.814	0.954
TR5183|c3_g2_i1	AT1G78140.1 | Symbols: | S-adenosyl-L-methionine-dependent methyltransferases superfamily protein | chr1:29401937-29403878 REVERSE LENGTH=355	1.46	0.406	0.206	0.309	0.544	-0.202	0.0442	-0.103	-0.0971	-0.0458	0.0365	0.896	0.916	0.997	0.157	0.922	0.989	1	1	0.986
TR5183|c3_g3_i1	AT4G25810.1 | Symbols: XTR6, XTH23 | xyloglucan endotransglycosylase 6 | chr4:13128694-13129715 FORWARD LENGTH=286	3.25	0.724	0.233	0.976	1.32	0.278	0.735	-0.581	-0.378	0.502	0.0244	0.976	0.97	0.724	0.09	0.96	0.735	1	1	0.854
TR5185|c0_g2_i4	AT3G14120.3 | Symbols: | FUNCTIONS IN: molecular_function unknown; INVOLVED IN: transport; LOCATED IN: nuclear pore; EXPRESSED IN: 22 plant structures; EXPRESSED DURING: 13 growth stages; CONTAINS InterPro DOMAIN/s: Nuclear pore protein 84/107 (InterPro:IPR007252). | chr3:4677993-4685455 FORWARD LENGTH=1098	-2.49	-0.463	-0.549	-0.196	-1.28	-0.396	-0.284	0.436	-0.0529	-0.496	0.0212	0.991	0.742	1	0.0556	0.883	0.891	1	1	0.739
TR5187|c0_g3_i1	AT3G43190.1 | Symbols: SUS4, ATSUS4 | sucrose synthase 4 | chr3:15179204-15182577 REVERSE LENGTH=808	-2.16	0.747	-0.628	-0.519	-1.76	-1.73	0.0242	0.0264	-0.854	-0.931	0.144	0.894	0.779	1	0.0232	0.368	0.999	1	0.772	0.458
TR5190|c2_g1_i1	AT5G11720.1 | Symbols: | Glycosyl hydrolases family 31 protein | chr5:3776840-3780025 FORWARD LENGTH=902	-3.26	-0.714	-0.496	-0.0223	-2.03	-1.05	-0.939	-0.214	0.674	-0.572	0.0224	0.923	0.865	1	0.0207	0.671	0.407	1	0.941	0.755
TR5194|c1_g6_i4	AT1G71000.1 | Symbols: | Chaperone DnaJ-domain superfamily protein | chr1:26769336-26770111 REVERSE LENGTH=165	-0.198	0.351	-0.477	0.0339	-0.107	1.31	1.3	-0.173	-0.351	0.537	0.951	1	0.868	1	0.916	0.559	0.0311	1	1	0.683
TR5196|c1_g2_i13	No informative hit E<10-6	-10	-0.858	0.327	-6.78	-2.69	0.494	0.15	0.504	0.00934	-0.169	0.00583	1	0.983	0.0143	0.319	0.962	0.992	1	1	0.989
TR5196|c1_g2_i3	No informative hit E<10-6	-10.1	-0.189	-0.585	-6.68	-2.68	1.32	-0.116	0.239	0.556	0.639	0.00332	1	0.954	0.013	0.303	0.848	0.995	1	1	0.912
TR5209|c2_g2_i1	AT1G67440.1 | Symbols: emb1688 | Minichromosome maintenance (MCM2/3/5) family protein | chr1:25263905-25265551 REVERSE LENGTH=433	2.42	0.414	0.496	0.334	1.18	0.217	0.5	-0.495	0.314	-0.102	0.0334	1	0.827	1	0.047	0.956	0.769	1	1	0.978
TR5215|c1_g1_i10	AT1G56720.3 | Symbols: | Protein kinase superfamily protein | chr1:21263630-21265559 REVERSE LENGTH=492	-1.75	-0.0378	-0.136	-0.437	-1.14	-0.311	-0.257	0.135	-0.215	0.0267	0.108	1	0.977	1	0.0328	0.913	0.907	1	1	0.998
TR5216|c0_g1_i2	AT5G15410.1 | Symbols: DND1, ATCNGC2, CNGC2 | Cyclic nucleotide-regulated ion channel family protein | chr5:5003460-5006763 REVERSE LENGTH=726	-2.52	-1.08	-0.0145	-0.144	-1.28	-0.376	-0.188	0.0689	-0.425	0.168	0.0436	0.514	1	1	0.0557	0.913	0.962	1	1	0.959
TR5216|c0_g2_i1	AT5G15410.2 | Symbols: DND1, ATCNGC2, CNGC2 | Cyclic nucleotide-regulated ion channel family protein | chr5:5003460-5006512 REVERSE LENGTH=725	-4.08	-1.17	-0.236	-0.109	-2.56	-0.829	0.0338	-0.0512	-0.735	-0.0768	0.00166	0.371	0.963	1	0.00176	0.783	0.998	1	0.887	0.991
TR5216|c0_g2_i4	AT5G15410.2 | Symbols: DND1, ATCNGC2, CNGC2 | Cyclic nucleotide-regulated ion channel family protein | chr5:5003460-5006512 REVERSE LENGTH=725	-3.94	-0.942	-0.629	-0.352	-2.01	-0.558	-0.328	0.213	-0.201	-0.242	0.0212	0.865	0.86	1	0.0728	0.915	0.945	1	1	0.962
TR5217|c0_g2_i1	AT1G73590.1 | Symbols: PIN1, ATPIN1 | Auxin efflux carrier family protein | chr1:27659772-27662876 FORWARD LENGTH=622	-4.04	-0.159	0.593	-1.91	-2.56	-4.01	-0.87	-0.154	-1.25	-1.74	0.147	1	0.915	0.177	0.241	0.029	0.657	1	0.667	0.331
TR5222|c3_g1_i1	AT2G37900.1 | Symbols: | Major facilitator superfamily protein | chr2:15864396-15866408 REVERSE LENGTH=575	-3.51	0.0529	-0.37	-1.16	-2.04	-1.96	-0.112	0.0742	-0.87	-1.05	0.00608	1	0.93	0.458	0.00187	0.307	0.984	1	0.809	0.344
TR5222|c3_g1_i3	AT3G53960.1 | Symbols: | Major facilitator superfamily protein | chr3:19978306-19980886 REVERSE LENGTH=602	-2.33	0.0371	0.54	-0.731	-2.18	-1.41	-0.0801	-0.365	-1.1	0.128	0.358	1	0.945	1	0.0256	0.731	0.995	1	0.903	0.988
TR5223|c2_g2_i5	AT1G18610.1 | Symbols: | Galactose oxidase/kelch repeat superfamily protein | chr1:6405779-6408831 FORWARD LENGTH=556	-1.46	-0.151	-0.0459	-0.326	-0.939	-0.336	-0.338	-0.00284	0.0593	-0.0542	0.136	1	0.997	1	0.0485	0.89	0.817	1	1	0.989
TR5227|c1_g2_i12	No informative hit E<10-6	-11.7	-1.16	-4.33	-2.37	-3.86	0.724	0.103	-0.141	0.222	0.54	0.0172	1	0.528	0.952	0.199	0.962	0.997	1	1	0.962
TR5227|c1_g2_i7	No informative hit E<10-6	-14.1	-1.43	-5.8	-1.65	-5.17	1.39	0.427	-0.358	0.3	1.02	0.00931	1	0.289	1	0.187	0.913	0.979	1	1	0.913
TR5229|c0_g1_i4	AT4G27190.1 | Symbols: | NB-ARC domain-containing disease resistance protein | chr4:13620977-13623934 REVERSE LENGTH=985	1.66	0.329	0.962	-0.265	0.632	5.88	0.409	1.03	1.93	2.51	0.606	1	0.833	1	0.708	0.00514	0.948	1	0.318	0.0819
TR5236|c0_g3_i2	No informative hit E<10-6	3.13	0.456	0.65	0.819	1.2	1.95	0.599	0.301	0.101	0.949	0.0104	1	0.766	0.756	0.0756	0.255	0.753	1	1	0.384
TR5236|c0_g3_i4	No informative hit E<10-6	2.3	-0.186	0.907	-0.6	2.18	1.94	0.669	-0.264	0.575	0.962	0.357	1	0.823	1	0.0404	0.58	0.862	1	1	0.72
TR5238|c1_g3_i5	AT1G51400.1 | Symbols: | Photosystem II 5 kD protein | chr1:19052172-19052492 REVERSE LENGTH=106	-6.17	-0.979	-1.83	-1.32	-2.04	1.37	1.09	0.341	0.447	-0.509	0.0151	1	0.592	0.949	0.164	0.819	0.793	1	1	0.931
TR5246|c2_g1_i1	AT2G16920.1 | Symbols: UBC23, PFU2 | ubiquitin-conjugating enzyme 23 | chr2:7334559-7338827 REVERSE LENGTH=1102	-4.88	-0.524	-1.01	-0.565	-2.78	-2.85	-0.604	-0.339	-0.312	-1.59	0.00325	1	0.617	1	0.0274	0.0993	0.773	1	1	0.182
TR5246|c2_g1_i2	AT2G16920.1 | Symbols: UBC23, PFU2 | ubiquitin-conjugating enzyme 23 | chr2:7334559-7338827 REVERSE LENGTH=1102	-2.17	-0.275	-0.723	-0.103	-1.07	-0.781	-0.325	0.196	-0.141	-0.512	0.0227	1	0.513	1	0.0437	0.661	0.849	1	1	0.656
TR5250|c1_g3_i3	AT3G02110.1 | Symbols: scpl25 | serine carboxypeptidase-like 25 | chr3:370902-373637 REVERSE LENGTH=473	1.98	0.258	0.727	-0.143	1.14	0.0969	-0.356	-0.0386	0.0741	0.417	0.0752	1	0.599	1	0.043	0.987	0.856	1	1	0.8
TR5255|c4_g2_i6	AT1G07360.1 | Symbols: | CCCH-type zinc fingerfamily protein with RNA-binding domain | chr1:2260562-2262795 REVERSE LENGTH=481	-1.51	-0.122	0.749	-0.0895	-2.05	0.796	-0.402	1.04	0.229	-0.068	0.541	1	0.841	1	0.0429	0.859	0.929	0.904	1	0.995
TR5257|c0_g1_i1	AT4G18570.1 | Symbols: | Tetratricopeptide repeat (TPR)-like superfamily protein | chr4:10231439-10234534 FORWARD LENGTH=642	-1.16	-0.329	-0.389	0.442	-0.883	-2.28	-1.18	-0.549	-0.372	-0.177	0.307	1	0.841	0.96	0.0948	0.0116	0.0176	0.899	1	0.938
TR5259|c2_g1_i3	AT2G23460.1 | Symbols: XLG1, ATXLG1 | extra-large G-protein 1 | chr2:9995699-9998945 FORWARD LENGTH=888	-0.895	0.185	0.622	0.448	-2.15	-1	0.0484	-0.586	0.14	-0.604	0.753	1	0.882	1	0.0304	0.792	0.997	1	1	0.839
TR5264|c0_g1_i2	AT5G19980.1 | Symbols: GONST4 | golgi nucleotide sugar transporter 4 | chr5:6749907-6750932 REVERSE LENGTH=341	-2.92	-1.44	-0.578	-0.0421	-0.856	-2.13	-1.43	-0.107	-0.613	0.0192	0.0174	0.0256	0.737	1	0.411	0.111	0.00582	1	0.856	1
TR5264|c0_g1_i7	AT5G19980.1 | Symbols: GONST4 | golgi nucleotide sugar transporter 4 | chr5:6749907-6750932 REVERSE LENGTH=341	-4.02	-0.737	-0.454	-0.592	-2.24	-2.83	-0.833	-0.588	-0.409	-1	0.000929	0.833	0.848	0.952	0.015	0.0231	0.41	0.94	1	0.498
TR5266|c0_g3_i2	AT5G40850.1 | Symbols: UPM1 | urophorphyrin methylase 1 | chr5:16367205-16368724 FORWARD LENGTH=369	-0.729	0.177	-0.175	-0.309	-0.423	1.14	-0.154	0.295	-0.17	1.17	0.557	1	0.959	1	0.464	0.42	0.952	1	1	0.0148
TR5278|c1_g1_i4	AT3G28670.1 | Symbols: | oxidoreductase, zinc-binding dehydrogenase family protein | chr3:10744183-10746983 FORWARD LENGTH=491	-1.58	0.022	-0.115	0.349	-1.84	-0.158	0.117	0.165	-0.499	0.0585	0.335	1	0.989	1	0.0186	0.977	0.98	1	0.999	0.994
TR5280|c2_g1_i1	AT4G22300.1 | Symbols: SOBER1 | carboxylesterases | chr4:11787560-11789252 REVERSE LENGTH=262	1.13	0.285	0.00819	-0.171	1.01	0.173	-0.028	0.365	-0.292	0.128	0.316	1	1	1	0.0352	0.956	0.997	1	1	0.958
TR5281|c1_g1_i1	AT1G19835.2 | Symbols: | Plant protein of unknown function (DUF869) | chr1:6856212-6859513 REVERSE LENGTH=982	-2.74	-0.509	-0.171	-0.745	-1.32	-1.94	-0.809	-0.174	-0.523	-0.436	0.0162	0.996	0.974	0.793	0.0332	0.183	0.426	1	0.994	0.801
TR5281|c1_g1_i3	AT1G19835.2 | Symbols: | Plant protein of unknown function (DUF869) | chr1:6856212-6859513 REVERSE LENGTH=982	-1.21	-0.0786	-0.0447	-0.685	-0.398	-1.78	-0.785	-0.145	-0.354	-0.498	0.111	1	0.994	0.315	0.352	0.00746	0.0548	1	0.954	0.432
TR5285|c1_g1_i2	AT3G12020.1 | Symbols: | P-loop containing nucleoside triphosphate hydrolases superfamily protein | chr3:3827016-3834146 FORWARD LENGTH=965	-2.02	-0.159	-0.967	-0.149	-0.745	-1.53	0.15	-0.0416	-0.712	-0.923	0.0486	1	0.249	1	0.291	0.146	0.946	1	0.484	0.103
TR5286|c0_g1_i2	AT3G22400.1 | Symbols: LOX5 | PLAT/LH2 domain-containing lipoxygenase family protein | chr3:7927011-7931167 FORWARD LENGTH=886	4.78	0.614	-0.179	1.71	2.64	-2.71	-1.15	-1.78	0.739	-0.52	0.00922	1	0.988	0.389	0.0104	0.308	0.557	0.51	1	0.885
TR5777|c2_g1_i2	AT4G17616.1 | Symbols: | Pentatricopeptide repeat (PPR) superfamily protein | chr4:9819608-9821632 FORWARD LENGTH=674	-3.77	-0.613	-1.64	-0.112	-1.41	-1.26	-0.701	-0.337	-0.119	-0.101	0.022	1	0.266	1	0.16	0.67	0.759	1	1	0.987
TR5781|c0_g1_i2	No informative hit E<10-6	-5.85	-2.19	-1.98	-0.279	-1.41	-0.415	0.419	0.301	-1.09	-0.0448	0.00878	0.215	0.369	1	0.297	0.949	0.929	1	1	0.999
TR5781|c0_g1_i3	No informative hit E<10-6	-3.49	-0.607	-1.74	-0.468	-0.679	-1.54	-0.0659	-0.605	-0.286	-0.588	0.0353	1	0.19	1	0.522	0.588	0.994	1	1	0.822
TR5781|c0_g1_i5	No informative hit E<10-6	-11.4	-2.8	-2.69	-3.08	-2.86	-1.18	1.09	1.04	-3.15	-0.158	0.00387	0.541	0.484	0.828	0.265	0.855	0.826	1	0.555	0.991
TR5781|c0_g1_i7	No informative hit E<10-6	-13.5	-1.99	-5.58	-1.88	-4	-0.707	-1.18	-0.00102	0.477	-0.00839	0.0198	1	0.367	1	0.358	0.98	0.914	1	1	1
TR5810|c1_g1_i13	AT1G64185.1 | Symbols: | Lactoylglutathione lyase / glyoxalase I family protein | chr1:23824527-23825152 FORWARD LENGTH=118	3.19	0.891	0.829	-0.618	2.09	-0.685	-0.463	-0.295	0.302	-0.229	0.0291	0.857	0.667	0.984	0.0107	0.851	0.864	1	1	0.963
TR5811|c2_g2_i1	AT2G25970.1 | Symbols: | KH domain-containing protein | chr2:11071844-11075604 REVERSE LENGTH=632	-2.46	-0.428	-1	-0.251	-0.775	-0.421	-0.438	0.311	-0.34	0.046	0.0443	1	0.41	1	0.345	0.892	0.805	1	1	0.995
TR5811|c2_g2_i12	AT2G25970.1 | Symbols: | KH domain-containing protein | chr2:11071844-11075604 REVERSE LENGTH=632	-3.04	-0.221	-1.25	-0.586	-0.983	-0.645	-0.0535	0.0452	-0.652	0.0148	0.00604	1	0.145	0.931	0.224	0.783	0.992	1	0.829	1
TR5833|c1_g1_i4	AT4G08920.1 | Symbols: CRY1, BLU1, HY4, OOP2, ATCRY1 | cryptochrome 1 | chr4:5724260-5726905 FORWARD LENGTH=681	-5	-0.537	-2.99	-1.1	-0.366	1.26	0.0832	-0.538	0.704	1.01	0.0408	1	0.113	0.987	0.856	0.819	0.996	1	1	0.764
TR5833|c1_g1_i5	AT4G08920.1 | Symbols: CRY1, BLU1, HY4, OOP2, ATCRY1 | cryptochrome 1 | chr4:5724260-5726905 FORWARD LENGTH=681	-2.48	-0.591	-1.25	-1.08	0.446	1.21	0.322	0.415	0.0866	0.382	0.043	0.978	0.208	0.426	0.577	0.556	0.905	1	1	0.853
TR5836|c1_g1_i2	AT2G42520.1 | Symbols: | P-loop containing nucleoside triphosphate hydrolases superfamily protein | chr2:17705382-17708744 FORWARD LENGTH=633	-1.3	-0.164	-0.15	0.0843	-1.07	0.0667	-0.182	0.381	0.0617	-0.194	0.179	1	0.963	1	0.0194	0.991	0.933	1	1	0.914
TR5867|c0_g1_i2	No informative hit E<10-6	-3.27	-0.386	-1.46	-0.234	-1.2	-2.63	-0.933	0.167	-0.837	-1.02	0.049	1	0.308	1	0.298	0.161	0.504	1	0.903	0.571
TR5867|c0_g1_i3	No informative hit E<10-6	-4.26	-1.1	-1.88	-0.837	-0.439	-1.2	-0.727	-0.0677	-0.38	-0.0243	0.0124	0.719	0.15	0.948	0.795	0.699	0.719	1	1	1
TR5872|c2_g2_i13	AT2G39730.3 | Symbols: RCA | rubisco activase | chr2:16571174-16573345 REVERSE LENGTH=441	1.44	0.584	0.159	0.473	0.222	2.34	0.818	0.785	0.414	0.323	0.114	0.759	0.961	0.9	0.719	0.00189	0.147	0.416	0.957	0.801
TR5872|c2_g2_i5	AT2G39730.3 | Symbols: RCA | rubisco activase | chr2:16571174-16573345 REVERSE LENGTH=441	2.48	0.706	0.538	0.739	0.502	2.46	1.11	0.0775	0.584	0.685	0.0234	0.83	0.795	0.763	0.465	0.0281	0.114	1	0.928	0.529
TR5872|c2_g2_i7	AT2G39730.3 | Symbols: RCA | rubisco activase | chr2:16571174-16573345 REVERSE LENGTH=441	1.47	0.511	0.257	0.487	0.213	2.14	0.728	0.711	0.394	0.309	0.0953	0.859	0.907	0.865	0.726	0.00504	0.228	0.523	0.965	0.81
TR5872|c2_g2_i9	AT2G39730.3 | Symbols: RCA | rubisco activase | chr2:16571174-16573345 REVERSE LENGTH=441	1.42	0.234	0.709	0.32	0.152	2.5	0.857	0.666	0.689	0.29	0.267	1	0.646	1	0.87	0.0231	0.335	0.894	0.814	0.885
TR5882|c2_g1_i10	AT3G56310.2 | Symbols: | Melibiase family protein | chr3:20882886-20885745 FORWARD LENGTH=413	1.47	-0.513	-0.0856	0.033	2.03	1.24	0.00674	0.256	0.139	0.841	0.477	1	0.996	1	0.0104	0.67	1	1	1	0.642
TR5882|c2_g1_i3	AT3G56310.2 | Symbols: | Melibiase family protein | chr3:20882886-20885745 FORWARD LENGTH=413	2.8	1.03	-0.11	0.95	0.936	0.275	0.198	-0.346	0.531	-0.109	0.00166	0.329	0.982	0.265	0.0681	0.927	0.942	1	0.88	0.972
TR5882|c2_g1_i5	AT3G56310.2 | Symbols: | Melibiase family protein | chr3:20882886-20885745 FORWARD LENGTH=413	2.12	0.545	0.259	0.671	0.643	0.19	0.347	-0.284	-0.0741	0.201	0.00541	0.838	0.902	0.454	0.146	0.945	0.807	1	1	0.913
TR5882|c2_g1_i6	AT3G56310.2 | Symbols: | Melibiase family protein | chr3:20882886-20885745 FORWARD LENGTH=413	1.28	-0.261	0.0222	0.082	1.44	1.26	-0.092	0.235	0.164	0.955	0.444	1	1	1	0.0303	0.576	0.987	1	1	0.42
TR5882|c2_g1_i9	AT3G56310.1 | Symbols: | Melibiase family protein | chr3:20882886-20885745 FORWARD LENGTH=437	1.27	-0.182	0.0455	0.478	0.928	0.874	0.312	0.246	0.0979	0.218	0.159	1	0.996	0.821	0.0256	0.504	0.821	1	1	0.889
TR5891|c3_g3_i1	AT2G02820.1 | Symbols: MYB88, AtMYB88 | myb domain protein 88 | chr2:804890-807139 REVERSE LENGTH=455	-3.02	-0.493	-0.65	-0.586	-1.29	-1.43	0.157	-0.461	-0.69	-0.437	0.00815	1	0.711	0.907	0.0935	0.369	0.958	0.999	0.728	0.836
TR5891|c3_g3_i3	AT1G14350.2 | Symbols: FLP, MYB124 | Duplicated homeodomain-like superfamily protein | chr1:4908427-4910647 FORWARD LENGTH=436	-3.57	-0.371	-0.665	-1.09	-1.45	-1.1	-0.0297	0.247	-0.313	-1	0.029	1	0.815	0.579	0.246	0.69	0.998	1	1	0.508
TR5901|c2_g2_i1	AT1G28340.1 | Symbols: AtRLP4, RLP4 | receptor like protein 4 | chr1:9940175-9943252 FORWARD LENGTH=626	-1.5	-0.254	-0.259	0.301	-1.28	-1.9	-0.282	-0.326	-0.384	-0.911	0.272	1	0.948	1	0.0429	0.172	0.913	1	1	0.305
TR5904|c1_g4_i6	No informative hit E<10-6	-4.63	-0.269	-2.71	-0.657	-1	-1.12	-0.129	0.0104	-0.646	-0.36	0.0283	1	0.0382	1	0.582	0.761	0.984	1	1	0.94
TR5907|c2_g1_i1	AT5G13030.1 | Symbols: | unknown protein; FUNCTIONS IN: molecular_function unknown; INVOLVED IN: biological_process unknown; LOCATED IN: chloroplast; EXPRESSED IN: 23 plant structures; EXPRESSED DURING: 13 growth stages; CONTAINS InterPro DOMAIN/s: Uncharacterised protein family UPF0061 (InterPro:IPR003846); Has 5046 Blast hits to 4997 proteins in 1211 species: Archae - 8; Bacteria - 2327; Metazo…	-1.29	0.201	-0.388	0.348	-1.45	-0.755	-0.177	-0.0773	-0.00317	-0.497	0.323	1	0.876	1	0.00902	0.723	0.952	1	1	0.723
TR5912|c0_g4_i1	AT3G14690.1 | Symbols: CYP72A15 | cytochrome P450, family 72, subfamily A, polypeptide 15 | chr3:4937410-4939310 FORWARD LENGTH=512	-0.398	-0.404	0.0773	-0.125	0.054	-5.36	-0.255	-1.27	-1.22	-2.61	0.91	1	0.998	1	0.98	0.000194	0.962	0.68	0.687	0.00138
TR5913|c0_g2_i2	AT2G20990.1 | Symbols: SYTA, NTMC2TYPE1.1, ATSYTA, NTMC2T1.1, SYT1 | synaptotagmin A | chr2:9014827-9017829 FORWARD LENGTH=541	-1.5	-0.373	-0.24	-0.306	-0.579	-2.86	-0.791	-0.61	-0.812	-0.645	0.314	1	0.958	1	0.487	0.0195	0.533	0.97	0.756	0.672
TR5913|c0_g2_i4	AT2G20990.1 | Symbols: SYTA, NTMC2TYPE1.1, ATSYTA, NTMC2T1.1, SYT1 | synaptotagmin A | chr2:9014827-9017829 FORWARD LENGTH=541	-1.28	-0.289	-0.539	0.0474	-0.495	-2.13	-0.4	-0.471	-0.499	-0.756	0.266	1	0.725	1	0.45	0.0317	0.792	0.978	0.934	0.355
TR5942|c4_g1_i3	AT4G30840.1 | Symbols: | Transducin/WD40 repeat-like superfamily protein | chr4:15017831-15019709 REVERSE LENGTH=361	-4.53	-0.632	-0.289	-0.622	-2.99	0.263	-0.395	0.0649	0.262	0.33	0.0025	1	0.962	1	0.000301	0.965	0.915	1	1	0.929
TR5942|c4_g1_i7	AT4G30840.1 | Symbols: | Transducin/WD40 repeat-like superfamily protein | chr4:15017831-15019709 REVERSE LENGTH=361	-14.1	-3.63	-0.156	-5.3	-5.02	0.437	0.373	-0.858	0.546	0.376	2.1e-05	0.429	0.999	0.0658	0.0152	0.979	0.979	1	1	0.976
TR5950|c0_g1_i8	AT1G70180.1 | Symbols: | Sterile alpha motif (SAM) domain-containing protein | chr1:26426768-26428985 FORWARD LENGTH=456	-1.51	0.565	-0.343	0.183	-1.92	1.58	0.298	0.398	0.938	-0.0509	0.469	1	0.946	1	0.0391	0.545	0.94	1	0.843	0.997
TR5951|c0_g2_i2	AT1G01720.1 | Symbols: ATAF1, ANAC002 | NAC (No Apical Meristem) domain transcriptional regulator superfamily protein | chr1:268471-269514 FORWARD LENGTH=289	2.89	0.465	0.398	-0.0488	2.07	2.28	0.508	-0.139	1.07	0.837	0.101	1	0.94	1	0.0164	0.343	0.852	1	0.879	0.665
TR5951|c0_g2_i4	AT1G01720.1 | Symbols: ATAF1, ANAC002 | NAC (No Apical Meristem) domain transcriptional regulator superfamily protein | chr1:268471-269514 FORWARD LENGTH=289	2.88	0.718	0.635	0.201	1.33	1.99	0.932	0.0324	0.298	0.729	0.0203	0.863	0.765	1	0.045	0.234	0.344	1	1	0.592
TR5951|c0_g2_i9	AT1G01720.1 | Symbols: ATAF1, ANAC002 | NAC (No Apical Meristem) domain transcriptional regulator superfamily protein | chr1:268471-269514 FORWARD LENGTH=289	3.22	0.413	0.645	0.415	1.75	1.13	0.575	-0.174	-0.0582	0.783	0.033	1	0.828	1	0.0216	0.704	0.805	1	1	0.667
TR5962|c0_g1_i1	AT2G23620.1 | Symbols: ATMES1, MES1 | methyl esterase 1 | chr2:10047462-10049248 REVERSE LENGTH=263	1.28	0.6	0.161	0.539	-0.0156	6.78	0.424	2.06	2.58	1.72	0.795	1	0.995	1	1	0.0373	0.967	0.765	0.512	0.645
TR5974|c5_g3_i3	AT2G29960.1 | Symbols: CYP5, ATCYP5, CYP19-4 | cyclophilin 5 | chr2:12769183-12770528 REVERSE LENGTH=201	-2.52	0.566	-0.694	0.641	-3.03	2.78	1.02	0.491	1.42	-0.151	0.47	1	0.931	1	0.0478	0.503	0.808	1	0.894	0.989
TR5981|c2_g3_i1	No informative hit E<10-6	-1.52	-0.205	-0.535	-0.405	-0.379	-7.92	-3.81	0	-5.01	0.898	0.394	1	0.866	1	0.731	1	0.019	1	0.0314	0.903
TR5981|c2_g3_i3	No informative hit E<10-6	-0.358	-0.191	-0.0835	0.044	-0.127	-8.06	-2.77	-1.87	-5.26	1.84	0.894	1	0.995	1	0.924	0.139	0.144	1	0.0105	0.606
TR5984|c0_g1_i2	AT1G04530.1 | Symbols: TPR4 | Tetratricopeptide repeat (TPR)-like superfamily protein | chr1:1234456-1235895 REVERSE LENGTH=310	0.275	0.172	0.519	0.0106	-0.427	-2.46	-0.233	-0.727	-0.282	-1.22	0.862	1	0.684	1	0.424	0.00115	0.901	0.54	1	0.00286
TR5984|c0_g1_i3	AT4G17940.1 | Symbols: | Tetratricopeptide repeat (TPR)-like superfamily protein | chr4:9965787-9966778 FORWARD LENGTH=274	0.982	0.911	-0.0539	-0.0437	0.168	-3.12	-0.711	-0.839	-0.158	-1.41	0.612	0.788	0.999	1	0.89	0.0229	0.685	0.872	1	0.0985
TR5997|c2_g2_i2	AT1G08600.1 | Symbols: ATRX, CHR20 | P-loop containing nucleoside triphosphate hydrolases superfamily protein | chr1:2724562-2733431 FORWARD LENGTH=1458	-9.04	-1.67	-2.44	-0.335	-4.59	-1.7	-0.824	0.688	-1.24	-0.318	0.00386	0.497	0.267	1	0.139	0.672	0.767	1	0.878	0.959
TR5998|c0_g1_i1	AT3G22890.1 | Symbols: APS1 | ATP sulfurylase 1 | chr3:8112837-8114734 FORWARD LENGTH=463	3.5	1.11	1.13	0.303	0.95	1.72	1.4	0.116	-0.0869	0.289	0.000305	0.297	0.228	1	0.114	0.253	0.0186	1	1	0.892
TR6004|c1_g2_i3	AT1G75380.3 | Symbols: ATBBD1, BBD1 | bifunctional nuclease in basal defense response 1 | chr1:28281789-28283631 REVERSE LENGTH=325	0.991	-0.964	0.619	-0.686	2.02	1.73	0.0308	0.68	0.365	0.658	0.617	0.844	0.713	0.774	0.0168	0.375	0.998	0.843	1	0.803
TR6004|c1_g2_i5	AT1G19660.2 | Symbols: | Wound-responsive family protein | chr1:6800361-6802240 REVERSE LENGTH=329	0.394	-0.754	0.486	-0.146	0.809	-0.0252	-0.457	0.347	-0.338	0.423	0.72	0.248	0.536	1	0.0404	1	0.514	0.949	0.941	0.611
TR6005|c1_g1_i1	AT4G33490.1 | Symbols: | Eukaryotic aspartyl protease family protein | chr4:16108928-16110670 REVERSE LENGTH=401	-4.75	-0.592	-1.65	0.0561	-2.57	-2.1	-0.0619	-0.829	-0.832	-0.376	0.0233	1	0.537	1	0.0241	0.612	0.997	1	1	0.952
TR6005|c1_g2_i1	AT4G33490.2 | Symbols: | Eukaryotic aspartyl protease family protein | chr4:16108781-16110679 REVERSE LENGTH=425	2.17	0.484	0.702	0.0115	0.976	0.129	-0.0189	-0.071	-0.00939	0.228	0.00658	0.936	0.437	1	0.023	0.969	0.998	1	1	0.887
TR6014|c0_g1_i1	AT1G56230.1 | Symbols: | Protein of unknown function (DUF1399) | chr1:21046111-21048959 REVERSE LENGTH=752	0.156	0.456	-0.419	-0.511	0.63	-2.97	-0.375	-0.946	-0.549	-1.1	0.96	1	0.862	1	0.427	0.00323	0.849	0.477	0.944	0.189
TR6014|c0_g1_i3	AT1G56230.1 | Symbols: | Protein of unknown function (DUF1399) | chr1:21046111-21048959 REVERSE LENGTH=752	-0.352	0.351	-0.144	-0.503	-0.0556	-3.08	-0.257	-1.14	-0.66	-1.02	0.9	1	0.984	1	0.974	0.0231	0.942	0.523	0.949	0.414
TR6019|c3_g2_i11	AT2G30170.2 | Symbols: | Protein phosphatase 2C family protein | chr2:12879802-12881046 REVERSE LENGTH=221	2.69	3.13	-1.77	-2.55	3.89	1.35	1.38	0.0966	-0.506	0.378	0.522	0.356	0.724	0.49	0.0223	0.843	0.732	1	1	0.96
TR6026|c3_g5_i1	No informative hit E<10-6	0.997	0.0809	0.0819	-0.233	1.07	0.531	0.412	-0.44	0.284	0.275	0.419	1	0.99	1	0.0263	0.801	0.778	0.994	1	0.869
TR6032|c1_g3_i4	AT2G02180.1 | Symbols: TOM3 | tobamovirus multiplication protein 3 | chr2:560976-562961 FORWARD LENGTH=303	2.6	0.869	0.659	0.605	0.471	0.78	0.251	0.0566	0.114	0.357	0.0494	0.786	0.769	0.982	0.587	0.784	0.942	1	1	0.883
TR6033|c3_g1_i1	AT5G65940.1 | Symbols: CHY1 | beta-hydroxyisobutyryl-CoA hydrolase 1 | chr5:26376830-26379161 REVERSE LENGTH=378	-1.84	-0.378	0.0298	-0.422	-1.07	0.366	0.0239	0.0451	-0.209	0.506	0.0596	1	1	0.984	0.0364	0.883	0.997	1	1	0.657
TR6033|c3_g1_i7	AT2G30650.1 | Symbols: | ATP-dependent caseinolytic (Clp) protease/crotonase family protein | chr2:13053777-13056315 REVERSE LENGTH=378	1.45	0.275	0.595	0.391	0.192	2.51	1.21	0.33	0.456	0.523	0.311	1	0.774	1	0.857	0.0415	0.112	1	1	0.754
TR6034|c1_g1_i2	AT1G27330.1 | Symbols: | Ribosome associated membrane protein RAMP4 | chr1:9493064-9493898 FORWARD LENGTH=68	1.16	-0.138	0.383	-0.269	1.19	0.981	0.695	-0.411	0.231	0.467	0.379	1	0.878	1	0.0286	0.607	0.519	1	1	0.752
TR6034|c1_g1_i3	AT1G27330.1 | Symbols: | Ribosome associated membrane protein RAMP4 | chr1:9493064-9493898 FORWARD LENGTH=68	1.18	-0.211	0.4	-0.257	1.25	0.842	0.622	-0.351	0.158	0.413	0.367	1	0.868	1	0.0197	0.68	0.605	1	1	0.8
TR6050|c1_g1_i3	AT4G24620.1 | Symbols: PGI1, PGI | phosphoglucose isomerase 1 | chr4:12708972-12712610 REVERSE LENGTH=613	-1.92	-0.0987	-0.455	-0.0809	-1.28	-1.26	-0.299	-0.257	0.02	-0.729	0.0554	1	0.798	1	0.00778	0.388	0.877	1	1	0.378
TR6050|c1_g1_i4	AT4G24620.1 | Symbols: PGI1, PGI | phosphoglucose isomerase 1 | chr4:12708972-12712610 REVERSE LENGTH=613	-1.93	-0.188	-0.323	-0.137	-1.28	-0.785	-0.112	-0.302	0.346	-0.717	0.108	1	0.918	1	0.0251	0.73	0.978	1	1	0.515
TR6052|c0_g3_i3	AT3G09350.1 | Symbols: Fes1A | Fes1A | chr3:2871216-2873109 FORWARD LENGTH=363	1.86	0.304	0.419	-0.166	1.31	1.82	0.285	0.428	-0.0634	1.17	0.092	1	0.857	1	0.00778	0.156	0.896	1	1	0.0452
TR6052|c0_g3_i6	AT3G09350.1 | Symbols: Fes1A | Fes1A | chr3:2871216-2873109 FORWARD LENGTH=363	0.894	-0.0346	0.284	-0.135	0.78	1.84	1.15	-0.0944	0.0452	0.743	0.466	1	0.913	1	0.118	0.0815	0.0197	1	1	0.301
TR6052|c0_g3_i7	AT3G09350.1 | Symbols: Fes1A | Fes1A | chr3:2871216-2873109 FORWARD LENGTH=363	1.24	0.103	-0.0557	-0.146	1.34	1.26	0.89	-0.296	-0.186	0.855	0.234	1	0.995	1	0.00129	0.333	0.12	1	1	0.135
TR6052|c0_g3_i8	AT3G09350.1 | Symbols: Fes1A | Fes1A | chr3:2871216-2873109 FORWARD LENGTH=363	1.59	0.187	0.25	0.195	0.953	1.98	0.773	0.0986	0.198	0.905	0.117	1	0.932	1	0.0404	0.0467	0.262	1	1	0.121
TR6058|c2_g3_i3	AT3G60340.2 | Symbols: | alpha/beta-Hydrolases superfamily protein | chr3:22304395-22306389 FORWARD LENGTH=338	-0.49	0.0149	0.554	0.192	-1.25	-0.123	-0.45	-0.318	0.0806	0.564	0.782	1	0.733	1	0.0451	0.979	0.776	1	1	0.656
TR6062|c1_g1_i4	AT2G16630.1 | Symbols: | Pollen Ole e 1 allergen and extensin family protein | chr2:7209286-7210872 FORWARD LENGTH=359	3.66	-0.161	1.53	0.636	1.65	0.868	-0.0458	-0.315	0.784	0.445	0.0234	1	0.34	1	0.0478	0.826	0.997	1	0.981	0.889
TR6071|c0_g2_i1	AT1G58250.1 | Symbols: SAB | Golgi-body localisation protein domain ;RNA pol II promoter Fmp27 protein domain | chr1:21587317-21601373 REVERSE LENGTH=2607	-3.74	-1.12	-1.5	-0.224	-0.888	-1.74	-0.488	-0.021	-0.395	-0.835	0.0391	0.699	0.385	1	0.545	0.545	0.867	1	1	0.77
TR6076|c3_g3_i1	AT5G57990.1 | Symbols: UBP23 | ubiquitin-specific protease 23 | chr5:23470218-23473997 REVERSE LENGTH=859	-2.28	-0.37	-0.864	-0.121	-0.92	0.4	-0.351	0.226	0.517	0.00805	0.0103	1	0.283	1	0.0887	0.858	0.804	1	0.868	1
TR6076|c3_g3_i3	AT5G57990.1 | Symbols: UBP23 | ubiquitin-specific protease 23 | chr5:23470218-23473997 REVERSE LENGTH=859	-2.14	-0.663	-0.645	-0.116	-0.716	-0.0292	-0.245	0.352	0.0258	-0.162	0.0409	0.773	0.646	1	0.278	1	0.914	1	1	0.949
TR6076|c3_g4_i3	AT5G57990.1 | Symbols: UBP23 | ubiquitin-specific protease 23 | chr5:23470218-23473997 REVERSE LENGTH=859	-3.18	-0.448	-0.883	-0.605	-1.25	-0.983	-0.68	0.323	0.125	-0.751	0.0324	1	0.65	0.998	0.238	0.72	0.674	1	1	0.683
TR6076|c3_g4_i5	AT5G57990.1 | Symbols: UBP23 | ubiquitin-specific protease 23 | chr5:23470218-23473997 REVERSE LENGTH=859	-3.44	-0.48	-1.48	-0.462	-1.02	-0.346	-0.46	-0.25	0.332	0.0317	0.00507	0.999	0.0746	1	0.305	0.92	0.78	1	1	0.999
TR6077|c1_g1_i2	AT3G49990.1 | Symbols: | unknown protein; Has 1524 Blast hits to 1298 proteins in 225 species: Archae - 9; Bacteria - 84; Metazoa - 474; Fungi - 184; Plants - 98; Viruses - 17; Other Eukaryotes - 658 (source: NCBI BLink). | chr3:18532492-18534000 REVERSE LENGTH=502	-1.3	-0.271	-0.242	0.114	-0.901	0.367	-0.0324	0.0337	0.544	-0.179	0.0544	1	0.865	1	0.0102	0.796	0.992	1	0.454	0.885
TR6080|c3_g1_i1	AT3G10060.1 | Symbols: | FKBP-like peptidyl-prolyl cis-trans isomerase family protein | chr3:3102291-3103801 FORWARD LENGTH=230	11.8	3.31	1.22	2.62	4.63	-0.358	-1.22	0.113	-0.281	1.03	0.01	0.678	0.928	0.94	0.0848	0.989	0.885	1	1	0.899
TR6082|c1_g1_i1	AT5G52640.1 | Symbols: HSP81-1, ATHS83, HSP81.1, HSP83, ATHSP90.1, AtHsp90-1, HSP90.1 | heat shock protein 90.1 | chr5:21352542-21355147 FORWARD LENGTH=705	5.85	6.57	-0.346	0	-0.372	9.99	4.24	0.891	1.31	3.55	1	0.00251	0.992	1	0.912	0.00914	0.0366	1	1	0.111
TR6082|c1_g1_i3	AT5G52640.1 | Symbols: HSP81-1, ATHS83, HSP81.1, HSP83, ATHSP90.1, AtHsp90-1, HSP90.1 | heat shock protein 90.1 | chr5:21352542-21355147 FORWARD LENGTH=705	4.67	1.14	1.12	0.0099	2.4	6.22	3.11	0.482	0.109	2.52	6.66e-08	0.231	0.227	1	2.87e-07	4.71e-15	6.56e-13	1	1	2.19e-08
TR6082|c1_g1_i6	AT5G52640.1 | Symbols: HSP81-1, ATHS83, HSP81.1, HSP83, ATHSP90.1, AtHsp90-1, HSP90.1 | heat shock protein 90.1 | chr5:21352542-21355147 FORWARD LENGTH=705	0.0913	2.46	1.46	-1.78	-2.05	12.6	3.64	2.23	1.58	5.21	0.82	0.852	0.887	1	0.41	0.0326	0.245	1	1	0.0327
TR6088|c1_g5_i2	AT1G76160.1 | Symbols: sks5 | SKU5 similar 5 | chr1:28578211-28581020 REVERSE LENGTH=541	2.27	0.419	0.296	-0.187	1.74	-0.453	0.0637	0.286	-0.541	-0.262	0.192	1	0.96	1	0.0266	0.921	0.995	1	1	0.946
TR6089|c1_g3_i12	AT5G55660.1 | Symbols: | DEK domain-containing chromatin associated protein | chr5:22539375-22543142 FORWARD LENGTH=778	0.1	0.0637	-0.358	-0.734	1.13	-0.108	0.0111	0.421	-0.12	-0.42	0.977	1	0.894	0.7	0.038	0.984	1	1	1	0.811
TR6089|c1_g3_i4	AT5G55660.1 | Symbols: | DEK domain-containing chromatin associated protein | chr5:22539375-22543142 FORWARD LENGTH=778	0.616	0.24	-0.283	-0.495	1.15	0.353	0.251	0.224	-0.218	0.0964	0.72	1	0.933	0.991	0.0437	0.911	0.926	1	1	0.98
TR6089|c1_g3_i5	AT5G55660.1 | Symbols: | DEK domain-containing chromatin associated protein | chr5:22539375-22543142 FORWARD LENGTH=778	0.332	-0.12	0.0236	-0.968	1.4	-1.12	-0.525	-0.13	-0.425	-0.0444	0.874	1	1	0.426	0.00933	0.553	0.734	1	1	0.995
TR6089|c1_g3_i9	AT5G55660.1 | Symbols: | DEK domain-containing chromatin associated protein | chr5:22539375-22543142 FORWARD LENGTH=778	0.5	-0.0976	-0.0733	-0.428	1.1	-0.333	-0.151	0.305	-0.147	-0.34	0.728	1	0.991	0.971	0.017	0.892	0.952	1	1	0.816
TR6092|c1_g2_i1	AT1G08800.2 | Symbols: | Protein of unknown function, DUF593 | chr1:2813578-2817078 REVERSE LENGTH=1113	-2.36	-0.257	-0.327	-0.0337	-1.74	-1.64	-0.512	-0.327	-0.743	-0.0624	0.132	1	0.945	1	0.0497	0.437	0.808	1	0.856	0.994
TR6096|c1_g1_i1	AT4G08990.1 | Symbols: | DNA (cytosine-5-)-methyltransferase family protein | chr4:5764781-5770496 FORWARD LENGTH=1512	-2.59	-0.74	-0.935	-0.317	-0.595	-1.35	-0.662	0.21	-0.188	-0.71	0.0263	0.687	0.346	1	0.553	0.393	0.478	1	1	0.553
TR6100|c1_g1_i2	AT4G28760.2 | Symbols: | Protein of unknown function (DUF3741) | chr4:14208640-14211811 FORWARD LENGTH=924	0.521	0.0578	0.184	0.0167	0.262	0.961	1.06	-0.107	0.00121	0.00852	0.668	1	0.95	1	0.663	0.435	0.0104	1	1	1
TR6101|c0_g1_i1	AT5G63840.1 | Symbols: RSW3, PSL5 | Glycosyl hydrolases family 31 protein | chr5:25545056-25548922 FORWARD LENGTH=921	-3.99	-0.39	-1.48	-1.08	-1.03	-3.52	-0.572	-0.234	-1.48	-1.23	0.0523	1	0.425	0.789	0.585	0.0446	0.826	1	0.414	0.461
TR6102|c1_g2_i2	AT4G07410.1 | Symbols: | Transducin family protein / WD-40 repeat family protein | chr4:4201465-4205136 REVERSE LENGTH=815	-1.8	-0.306	-0.49	0.00313	-1.01	-0.288	-0.622	0.261	0.0434	0.0295	0.0477	1	0.714	1	0.0512	0.907	0.383	1	1	0.997
TR6105|c0_g1_i2	AT4G21710.1 | Symbols: NRPB2, EMB1989, RPB2 | DNA-directed RNA polymerase family protein | chr4:11535684-11542200 REVERSE LENGTH=1188	-1.23	0.00853	0.111	0.0298	-1.38	1.2	0.0907	0.678	0.389	0.0415	0.338	1	0.984	1	0.0106	0.472	0.982	0.816	1	0.995
TR6111|c3_g4_i2	AT5G61530.1 | Symbols: | small G protein family protein / RhoGAP family protein | chr5:24742630-24744586 FORWARD LENGTH=376	3.3	0.437	1.1	0.283	1.48	-0.408	-0.0188	-0.138	0.127	-0.378	0.0175	1	0.513	1	0.0399	0.928	1	1	1	0.896
TR6115|c2_g1_i1	AT1G54350.1 | Symbols: | ABC transporter family protein | chr1:20286917-20290245 FORWARD LENGTH=706	-3.22	-0.705	-0.816	-0.0623	-1.64	-0.0732	-0.119	-0.112	0.199	-0.0414	0.0227	0.938	0.724	1	0.0304	0.998	0.98	1	1	0.997
TR6119|c0_g3_i1	AT2G25680.1 | Symbols: MOT1 | molybdate transporter 1 | chr2:10933167-10934537 REVERSE LENGTH=456	-1.95	-0.211	-0.448	-0.587	-0.706	0.235	-0.225	0.0419	0.19	0.228	0.0227	1	0.758	0.715	0.152	0.93	0.911	1	1	0.896
TR6125|c3_g2_i1	AT4G30720.1 | Symbols: | FAD/NAD(P)-binding oxidoreductase family protein | chr4:14972212-14975461 REVERSE LENGTH=707	-0.0698	-0.11	0.0275	0.195	-0.182	1.63	0.335	0.266	0.34	0.692	0.978	1	0.999	1	0.782	0.0297	0.755	1	0.96	0.225
TR6129|c2_g2_i2	AT1G23230.2 | Symbols: | FUNCTIONS IN: molecular_function unknown; INVOLVED IN: response to salt stress; EXPRESSED IN: 24 plant structures; EXPRESSED DURING: 15 growth stages; CONTAINS InterPro DOMAIN/s: Mediator complex subunit Med23 (InterPro:IPR021629). | chr1:8244481-8251741 FORWARD LENGTH=1592	-3.66	-0.843	-1.44	0.298	-1.67	-2.14	-0.736	-0.367	-0.335	-0.706	0.0382	0.951	0.428	1	0.121	0.372	0.745	1	1	0.764
TR6139|c2_g1_i6	AT5G36940.1 | Symbols: CAT3 | cationic amino acid transporter 3 | chr5:14590330-14594137 FORWARD LENGTH=609	0.702	-0.124	-0.0524	-0.125	1	1.18	0.575	0.215	-0.11	0.505	0.578	1	0.995	1	0.0268	0.387	0.563	1	1	0.623
TR6140|c3_g3_i3	AT2G26260.2 | Symbols: AT3BETAHSD/D2, 3BETAHSD/D2 | 3beta-hydroxysteroid-dehydrogenase/decarboxylase isoform 2 | chr2:11178586-11182872 FORWARD LENGTH=473	-1.05	-1.49	-0.32	0.574	0.19	-3.85	-0.794	-1.33	2.93	-4.65	0.782	0.814	0.974	1	0.937	0.439	0.877	0.896	0.278	0.00503
TR6144|c0_g2_i6	No informative hit E<10-6	-4.21	-0.747	-1.87	-0.619	-0.97	-2.38	-0.918	-0.275	-0.644	-0.545	0.00279	0.944	0.092	1	0.357	0.179	0.496	1	0.971	0.817
TR6147|c3_g2_i1	AT3G10650.1 | Symbols: | BEST Arabidopsis thaliana protein match is: nucleoporin-related (TAIR:AT5G20200.1); Has 61042 Blast hits to 31782 proteins in 2093 species: Archae - 202; Bacteria - 16480; Metazoa - 16017; Fungi - 12552; Plants - 1653; Viruses - 629; Other Eukaryotes - 13509 (source: NCBI BLink). | chr3:3325562-3330819 REVERSE LENGTH=1309	-1.58	-0.397	-0.288	-0.124	-0.773	-0.123	-0.265	0.0963	-0.00571	0.0518	0.00452	0.784	0.788	1	0.00954	0.951	0.763	1	1	0.979
TR6151|c3_g2_i12	AT4G03460.1 | Symbols: | Ankyrin repeat family protein | chr4:1536404-1540111 REVERSE LENGTH=677	2.35	-0.429	-0.897	-0.666	4.34	0.137	0.32	-1.49	1.29	0.0107	0.636	1	0.934	1	0.015	1	0.981	1	1	1
TR6151|c3_g2_i13	AT4G14390.1 | Symbols: | Ankyrin repeat family protein | chr4:8289644-8292083 FORWARD LENGTH=694	2.07	0.887	-1.66	-3.17	6.02	-0.256	-0.0329	-0.487	0.366	-0.102	0.788	1	0.868	0.672	0.0111	0.996	1	1	1	0.998
TR6151|c3_g2_i16	AT4G03460.1 | Symbols: | Ankyrin repeat family protein | chr4:1536404-1540111 REVERSE LENGTH=677	1.51	-0.573	-1.06	-1.92	5.07	-1.47	-1.03	-0.638	0.766	-0.565	0.78	1	0.901	0.829	0.00237	0.852	0.873	1	1	0.938
TR6152|c3_g2_i6	AT2G37630.1 | Symbols: ATPHAN, AS1, ATMYB91, MYB91 | myb-like HTH transcriptional regulator family protein | chr2:15781798-15782901 REVERSE LENGTH=367	-1.37	0.504	-0.352	0.0401	-1.56	0.412	0.62	0.249	-0.504	0.0474	0.379	1	0.932	1	0.0247	0.894	0.678	1	0.92	0.995
TR6154|c2_g1_i2	AT4G37030.1 | Symbols: | unknown protein; FUNCTIONS IN: molecular_function unknown; INVOLVED IN: biological_process unknown; LOCATED IN: endomembrane system; BEST Arabidopsis thaliana protein match is: unknown protein (TAIR:AT4G12680.1); Has 101 Blast hits to 99 proteins in 12 species: Archae - 0; Bacteria - 0; Metazoa - 0; Fungi - 0; Plants - 101; Viruses - 0; Other Eukaryotes - 0 (source: NCBI …	-1.13	0.235	0.921	0.204	-2.49	12.3	-0.194	2.65	5.51	4.37	0.87	1	0.939	1	0.307	0.0192	0.995	0.931	0.232	0.408
TR6157|c1_g1_i3	AT1G06230.3 | Symbols: GTE4 | global transcription factor group E4 | chr1:1907626-1910183 FORWARD LENGTH=766	-1.29	-0.246	-0.322	-0.0286	-0.693	-0.483	-0.232	-0.0612	-0.0627	-0.127	0.037	1	0.747	1	0.0331	0.665	0.806	1	1	0.922
TR6164|c3_g2_i2	AT2G20830.1 | Symbols: | transferases;folic acid binding | chr2:8968370-8969798 REVERSE LENGTH=297	0.264	-0.174	-0.521	-0.32	1.28	0.974	-0.139	-0.113	0.651	0.574	0.907	1	0.808	1	0.0236	0.578	0.964	1	0.749	0.627
TR6168|c1_g2_i7	AT5G16520.1 | Symbols: | unknown protein; Has 25 Blast hits to 25 proteins in 9 species: Archae - 0; Bacteria - 0; Metazoa - 0; Fungi - 0; Plants - 25; Viruses - 0; Other Eukaryotes - 0 (source: NCBI BLink). | chr5:5394740-5397371 REVERSE LENGTH=608	1.05	-0.0328	0.354	-0.0322	0.765	0.22	0.0256	0.0822	0.000528	0.112	0.167	1	0.752	1	0.0367	0.908	0.996	1	1	0.948
TR6175|c1_g4_i1	AT5G61380.1 | Symbols: TOC1, APRR1, PRR1, AtTOC1 | CCT motif -containing response regulator protein | chr5:24675540-24678176 FORWARD LENGTH=618	-4.02	-0.945	-0.101	-0.299	-2.67	-0.423	-0.166	0.257	-0.13	-0.384	0.0453	0.648	0.986	1	0.177	0.912	0.963	1	1	0.939
TR6650|c2_g2_i1	AT5G19730.1 | Symbols: | Pectin lyase-like superfamily protein | chr5:6670562-6673202 FORWARD LENGTH=383	-1.15	0.0838	-0.199	-0.497	-0.543	-1.58	-0.65	-0.101	-0.303	-0.524	0.151	1	0.928	0.724	0.189	0.0322	0.187	1	0.999	0.4
TR6660|c0_g1_i5	AT2G16710.3 | Symbols: | Iron-sulphur cluster biosynthesis family protein | chr2:7248294-7250013 FORWARD LENGTH=143	2.22	0.869	0.577	0.235	0.541	0.961	0.583	-0.109	0.22	0.267	0.0489	0.632	0.753	1	0.433	0.636	0.677	1	1	0.904
TR6677|c0_g1_i7	AT2G34860.2 | Symbols: EDA3 | DnaJ/Hsp40 cysteine-rich domain superfamily protein | chr2:14708380-14709804 FORWARD LENGTH=186	1.73	0.378	0.411	0.197	0.74	0.394	0.142	-0.345	0.323	0.274	0.0444	0.999	0.786	1	0.103	0.85	0.953	1	1	0.852
TR6710|c2_g1_i2	AT2G43750.2 | Symbols: OASB | O-acetylserine (thiol) lyase B | chr2:18129604-18132322 REVERSE LENGTH=392	-1.39	-0.202	-0.262	-0.0567	-0.868	-0.0142	0.0905	0.308	-0.436	0.0236	0.074	1	0.876	1	0.0274	1	0.969	1	0.842	0.997
TR6725|c4_g1_i1	AT5G54390.1 | Symbols: AHL, ATAHL, HL | HAL2-like | chr5:22086133-22087586 FORWARD LENGTH=373	2.93	0.371	1.05	0.665	0.843	1.16	0.679	0.445	-0.507	0.54	0.00175	1	0.227	0.77	0.135	0.489	0.522	1	0.949	0.654
TR6733|c0_g3_i1	AT5G67320.1 | Symbols: HOS15 | WD-40 repeat family protein | chr5:26857268-26860974 FORWARD LENGTH=613	0.978	0.289	0.0356	-0.56	1.21	0.142	-0.27	0.204	0.148	0.0601	0.418	1	1	0.856	0.00933	0.97	0.894	1	1	0.988
TR6733|c0_g3_i2	AT5G67320.1 | Symbols: HOS15 | WD-40 repeat family protein | chr5:26857268-26860974 FORWARD LENGTH=613	1.47	0.187	0.289	-1.17	2.16	0.559	-0.855	0.587	0.562	0.266	0.394	1	0.954	0.467	0.00101	0.877	0.565	1	1	0.934
TR6733|c0_g3_i3	AT5G67320.1 | Symbols: HOS15 | WD-40 repeat family protein | chr5:26857268-26860974 FORWARD LENGTH=613	0.838	0.0848	0.0803	-0.559	1.23	0.463	-0.146	0.242	0.177	0.189	0.521	1	0.99	0.873	0.00975	0.845	0.962	1	1	0.932
TR6738|c9_g2_i1	AT1G21280.1 | Symbols: | CONTAINS InterPro DOMAIN/s: Retrotransposon gag protein (InterPro:IPR005162); Has 707 Blast hits to 705 proteins in 25 species: Archae - 0; Bacteria - 0; Metazoa - 4; Fungi - 0; Plants - 703; Viruses - 0; Other Eukaryotes - 0 (source: NCBI BLink). | chr1:7447690-7448403 REVERSE LENGTH=237	-16.3	-6.04	-6.53	-3.12	-0.588	-5.3	0	-5.3	0	0	0.0492	0.761	0.574	1	0.938	1	1	0.833	1	1
TR6741|c1_g3_i3	No informative hit E<10-6	5.35	1.05	1.88	3.1	-0.665	8.63	4.06	1.77	0.46	2.35	0.167	1	0.688	0.376	0.83	0.0359	0.324	0.911	1	0.66
TR6752|c4_g2_i7	No informative hit E<10-6	-3.97	-1.3	-1.01	-2.75	1.09	0.793	0.708	0.55	-0.0884	-0.377	0.0548	0.821	0.764	0.0475	0.374	0.881	0.841	1	1	0.938
TR6762|c0_g1_i2	No informative hit E<10-6	-3.65	-0.387	-1.29	-0.46	-1.51	-1.27	-0.41	0.347	-0.598	-0.609	0.0146	1	0.41	1	0.105	0.634	0.89	1	0.999	0.783
TR6772|c0_g1_i1	AT1G75900.1 | Symbols: | GDSL-like Lipase/Acylhydrolase superfamily protein | chr1:28499179-28500943 FORWARD LENGTH=364	2.65	0.651	0.887	0.719	0.39	1.09	0.837	0.0754	-0.138	0.32	0.0248	0.911	0.515	0.839	0.66	0.595	0.429	1	1	0.885
TR6772|c0_g1_i4	AT1G75900.1 | Symbols: | GDSL-like Lipase/Acylhydrolase superfamily protein | chr1:28499179-28500943 FORWARD LENGTH=364	2.83	1.33	0.893	0.175	0.434	1.62	1.15	0.0549	0.0539	0.363	0.0481	0.297	0.642	1	0.683	0.448	0.275	1	1	0.888
TR6784|c1_g1_i1	AT1G19920.1 | Symbols: APS2, ASA1 | Pseudouridine synthase/archaeosine transglycosylase-like family protein | chr1:6914835-6916657 REVERSE LENGTH=476	-1.38	-0.0687	-0.0539	-0.104	-1.16	-0.625	-0.0918	0.0262	-0.28	-0.279	0.145	1	0.995	1	0.00408	0.719	0.975	1	1	0.84
TR6784|c1_g1_i2	AT1G19920.1 | Symbols: APS2, ASA1 | Pseudouridine synthase/archaeosine transglycosylase-like family protein | chr1:6914835-6916657 REVERSE LENGTH=476	-1.78	-0.00928	-0.374	-0.00566	-1.39	-0.182	0.204	0.109	0.0607	-0.556	0.193	1	0.911	1	0.0181	0.97	0.949	1	1	0.704
TR6784|c1_g1_i8	AT1G19920.1 | Symbols: APS2, ASA1 | Pseudouridine synthase/archaeosine transglycosylase-like family protein | chr1:6914835-6916657 REVERSE LENGTH=476	-3.13	-0.326	-0.477	-0.413	-1.91	-0.791	-0.211	-0.117	0.308	-0.771	0.0144	1	0.878	1	0.00229	0.784	0.954	1	1	0.564
TR6797|c0_g1_i1	AT4G21120.1 | Symbols: AAT1, CAT1 | amino acid transporter 1 | chr4:11270318-11273775 FORWARD LENGTH=594	5.59	1.98	1.57	1.2	0.849	3.62	0.656	0.798	0.99	1.17	0.00426	0.543	0.515	0.683	0.564	0.0971	0.877	1	0.799	0.598
TR6812|c2_g2_i6	AT3G04610.1 | Symbols: FLK | RNA-binding KH domain-containing protein | chr3:1250762-1254272 REVERSE LENGTH=577	-2.87	-0.221	-0.361	-0.86	-1.43	-0.489	0.508	-0.158	-0.503	-0.336	0.0149	1	0.913	0.668	0.0286	0.873	0.775	1	0.992	0.879
TR6838|c0_g1_i1	AT5G40690.1 | Symbols: | CONTAINS InterPro DOMAIN/s: EF-Hand 1, calcium-binding site (InterPro:IPR018247); BEST Arabidopsis thaliana protein match is: unknown protein (TAIR:AT2G41730.1); Has 1807 Blast hits to 1807 proteins in 277 species: Archae - 0; Bacteria - 0; Metazoa - 736; Fungi - 347; Plants - 385; Viruses - 0; Other Eukaryotes - 339 (source: NCBI BLink). | chr5:16290770-16291402 FORWARD …	4.56	1.28	2	0.159	1.12	7.64	2.12	3	0.839	1.68	0.205	1	0.799	1	0.508	0.00213	0.417	0.338	1	0.517
TR6838|c0_g1_i10	AT5G40690.1 | Symbols: | CONTAINS InterPro DOMAIN/s: EF-Hand 1, calcium-binding site (InterPro:IPR018247); BEST Arabidopsis thaliana protein match is: unknown protein (TAIR:AT2G41730.1); Has 1807 Blast hits to 1807 proteins in 277 species: Archae - 0; Bacteria - 0; Metazoa - 736; Fungi - 347; Plants - 385; Viruses - 0; Other Eukaryotes - 339 (source: NCBI BLink). | chr5:16290770-16291402 FORWARD …	9.25	2.66	2.12	1.58	2.89	6.12	0.97	2.38	-0.232	3.01	0.013	0.741	0.807	0.974	0.141	0.13	0.9	0.799	1	0.218
TR6838|c0_g1_i11	AT5G40690.1 | Symbols: | CONTAINS InterPro DOMAIN/s: EF-Hand 1, calcium-binding site (InterPro:IPR018247); BEST Arabidopsis thaliana protein match is: unknown protein (TAIR:AT2G41730.1); Has 1807 Blast hits to 1807 proteins in 277 species: Archae - 0; Bacteria - 0; Metazoa - 736; Fungi - 347; Plants - 385; Viruses - 0; Other Eukaryotes - 339 (source: NCBI BLink). | chr5:16290770-16291402 FORWARD …	7.52	1.81	1.53	2.05	2.12	6.54	1.39	3.13	0.556	1.46	0.00024	0.657	0.703	0.395	0.0731	0.00114	0.611	0.0515	1	0.491
TR6838|c0_g1_i13	AT5G40690.1 | Symbols: | CONTAINS InterPro DOMAIN/s: EF-Hand 1, calcium-binding site (InterPro:IPR018247); BEST Arabidopsis thaliana protein match is: unknown protein (TAIR:AT2G41730.1); Has 1807 Blast hits to 1807 proteins in 277 species: Archae - 0; Bacteria - 0; Metazoa - 736; Fungi - 347; Plants - 385; Viruses - 0; Other Eukaryotes - 339 (source: NCBI BLink). | chr5:16290770-16291402 FORWARD …	6.4	1.77	1.59	1.03	2.01	6.35	0.677	2.55	0.994	2.13	0.00353	0.703	0.641	0.992	0.111	0.00347	0.894	0.244	0.992	0.225
TR6838|c0_g1_i2	AT5G40690.1 | Symbols: | CONTAINS InterPro DOMAIN/s: EF-Hand 1, calcium-binding site (InterPro:IPR018247); BEST Arabidopsis thaliana protein match is: unknown protein (TAIR:AT2G41730.1); Has 1807 Blast hits to 1807 proteins in 277 species: Archae - 0; Bacteria - 0; Metazoa - 736; Fungi - 347; Plants - 385; Viruses - 0; Other Eukaryotes - 339 (source: NCBI BLink). | chr5:16290770-16291402 FORWARD …	7.92	1.64	1.13	1.44	3.7	5.42	1.59	2.58	-0.129	1.37	0.0181	0.983	0.9	1	0.0429	0.221	0.747	0.731	1	0.78
TR6838|c0_g1_i4	AT5G40690.1 | Symbols: | CONTAINS InterPro DOMAIN/s: EF-Hand 1, calcium-binding site (InterPro:IPR018247); BEST Arabidopsis thaliana protein match is: unknown protein (TAIR:AT2G41730.1); Has 1807 Blast hits to 1807 proteins in 277 species: Archae - 0; Bacteria - 0; Metazoa - 736; Fungi - 347; Plants - 385; Viruses - 0; Other Eukaryotes - 339 (source: NCBI BLink). | chr5:16290770-16291402 FORWARD …	6.19	1.3	2.29	0.563	2.04	8.46	0.961	3.76	1.54	2.2	0.00306	0.909	0.337	1	0.0799	3.36e-06	0.792	0.00432	0.7	0.146
TR6838|c0_g1_i5	AT5G40690.1 | Symbols: | CONTAINS InterPro DOMAIN/s: EF-Hand 1, calcium-binding site (InterPro:IPR018247); BEST Arabidopsis thaliana protein match is: unknown protein (TAIR:AT2G41730.1); Has 1807 Blast hits to 1807 proteins in 277 species: Archae - 0; Bacteria - 0; Metazoa - 736; Fungi - 347; Plants - 385; Viruses - 0; Other Eukaryotes - 339 (source: NCBI BLink). | chr5:16290770-16291402 FORWARD …	6.28	1.48	0.566	2.28	1.97	8.84	2.99	3.49	1.33	1.03	0.00024	0.659	0.933	0.13	0.0365	2.47e-11	0.000956	0.00026	0.532	0.559
TR6838|c0_g1_i6	AT5G40690.1 | Symbols: | CONTAINS InterPro DOMAIN/s: EF-Hand 1, calcium-binding site (InterPro:IPR018247); BEST Arabidopsis thaliana protein match is: unknown protein (TAIR:AT2G41730.1); Has 1807 Blast hits to 1807 proteins in 277 species: Archae - 0; Bacteria - 0; Metazoa - 736; Fungi - 347; Plants - 385; Viruses - 0; Other Eukaryotes - 339 (source: NCBI BLink). | chr5:16290770-16291402 FORWARD …	6.19	1.61	1.54	0.828	2.21	7.13	0.987	2.84	1.08	2.23	7.07e-06	0.368	0.388	0.945	0.0059	2.3e-08	0.622	0.0027	0.749	0.00742
TR6838|c0_g1_i7	AT5G40690.1 | Symbols: | CONTAINS InterPro DOMAIN/s: EF-Hand 1, calcium-binding site (InterPro:IPR018247); BEST Arabidopsis thaliana protein match is: unknown protein (TAIR:AT2G41730.1); Has 1807 Blast hits to 1807 proteins in 277 species: Archae - 0; Bacteria - 0; Metazoa - 736; Fungi - 347; Plants - 385; Viruses - 0; Other Eukaryotes - 339 (source: NCBI BLink). | chr5:16290770-16291402 FORWARD …	8.64	2.46	1.67	0.175	4.33	7.6	1.78	2.88	1.11	1.83	0.00085	0.553	0.744	1	0.00212	0.00399	0.602	0.385	0.998	0.515
TR6843|c6_g4_i1	No informative hit E<10-6	-4.1	0.0269	-4.62	-5.38	5.87	7.13	1.71	1.23	2.28	1.92	0.594	1	0.398	0.324	0.0388	0.249	0.826	1	0.972	0.77
TR7471|c4_g1_i1	AT4G30150.1 | Symbols: | CONTAINS InterPro DOMAIN/s: Nucleolar 27S pre-rRNA processing, Urb2/Npa2 (InterPro:IPR018849); Has 58 Blast hits to 49 proteins in 21 species: Archae - 0; Bacteria - 2; Metazoa - 2; Fungi - 0; Plants - 44; Viruses - 3; Other Eukaryotes - 7 (source: NCBI BLink). | chr4:14742452-14749764 FORWARD LENGTH=2009	-2.51	-0.599	-0.447	-0.0356	-1.43	-0.706	-0.64	0.00409	-0.198	0.128	0.0333	0.909	0.833	1	0.0661	0.754	0.542	1	1	0.972
TR7473|c1_g1_i4	No informative hit E<10-6	-8.81	-3.42	-1.32	-3.83	-0.247	4.18	1.61	1.9	0.329	0.347	0.0233	0.515	0.887	0.429	0.949	0.489	0.785	0.97	1	0.976
TR7475|c2_g1_i1	AT4G38430.1 | Symbols: ATROPGEF1, ROPGEF1 | rho guanyl-nucleotide exchange factor 1 | chr4:17986643-17988659 FORWARD LENGTH=548	-2.99	-0.664	-0.905	-0.00751	-1.42	-0.829	-0.205	-0.00708	-0.255	-0.362	0.000107	0.644	0.254	1	0.00241	0.568	0.915	1	1	0.765
TR7480|c5_g3_i1	AT1G50010.1 | Symbols: TUA2 | tubulin alpha-2 chain | chr1:18517737-18519729 FORWARD LENGTH=450	-1.42	-0.51	-0.0403	0.125	-1	-0.527	-0.0937	-0.236	-0.091	-0.107	0.173	0.938	0.999	1	0.0431	0.803	0.978	1	1	0.968
TR7482|c2_g1_i2	No informative hit E<10-6	3.05	0.997	0.398	1.11	0.544	0.613	0.472	-0.379	0.318	0.201	0.0477	0.83	0.933	0.587	0.597	0.867	0.868	1	1	0.957
TR7486|c0_g2_i1	AT5G61480.1 | Symbols: PXY | Leucine-rich repeat protein kinase family protein | chr5:24724541-24727842 REVERSE LENGTH=1041	-1.77	-0.303	-0.709	-0.194	-0.563	-1.49	-0.0573	0.0161	-0.763	-0.683	0.024	1	0.373	1	0.237	0.0802	0.985	1	0.262	0.207
TR7487|c1_g2_i1	AT1G05060.1 | Symbols: | unknown protein; Has 34 Blast hits to 34 proteins in 13 species: Archae - 0; Bacteria - 0; Metazoa - 0; Fungi - 0; Plants - 34; Viruses - 0; Other Eukaryotes - 0 (source: NCBI BLink). | chr1:1451255-1452858 REVERSE LENGTH=253	2.5	0.982	0.0741	-0.00463	1.45	2.23	0.321	1.3	-0.00712	0.612	0.0269	0.522	0.993	1	0.015	0.0991	0.901	0.154	1	0.703
TR7491|c2_g1_i7	AT1G59510.1 | Symbols: CF9 | Carbohydrate-binding protein | chr1:21859768-21860913 FORWARD LENGTH=381	2.19	-0.207	0.933	-0.0202	1.48	0.836	0.0541	-0.0464	0.31	0.518	0.216	1	0.736	1	0.0496	0.817	0.997	1	1	0.848
TR7502|c3_g3_i1	AT1G78950.1 | Symbols: | Terpenoid cyclases family protein | chr1:29684558-29688673 REVERSE LENGTH=759	-2.6	-0.884	-1.47	-0.161	-0.0867	-5.91	-0.229	-2.04	-1.27	-2.36	0.409	1	0.686	1	0.975	0.00741	0.978	0.527	0.922	0.119
TR7510|c1_g3_i2	AT3G19540.1 | Symbols: | Protein of unknown function (DUF620) | chr3:6780762-6782633 FORWARD LENGTH=485	-1.6	0.11	-0.424	-0.298	-0.993	-1.47	-0.572	-0.29	-0.275	-0.334	0.0174	1	0.679	0.991	0.00328	0.0379	0.28	1	0.999	0.707
TR7516|c2_g3_i6	AT1G33720.1 | Symbols: CYP76C6 | cytochrome P450, family 76, subfamily C, polypeptide 6 | chr1:12220957-12223981 REVERSE LENGTH=511	6.24	-0.168	0.418	0.386	5.61	-2.84	-1.43	-0.468	-1	0.0704	0.147	1	0.963	1	0.0384	0.551	0.604	1	1	1
TR7526|c0_g1_i4	AT1G63490.1 | Symbols: | transcription factor jumonji (jmjC) domain-containing protein | chr1:23544938-23551946 REVERSE LENGTH=1116	-4.63	-0.659	-2.41	-0.208	-1.35	-0.133	-0.283	-0.524	0.333	0.341	0.039	1	0.162	1	0.432	0.994	0.95	1	1	0.951
TR7526|c0_g1_i5	AT1G63490.1 | Symbols: | transcription factor jumonji (jmjC) domain-containing protein | chr1:23544938-23551946 REVERSE LENGTH=1116	-6.62	-1.17	-2.86	-0.675	-1.92	0.202	-0.177	0.598	0.611	-0.831	0.0353	0.936	0.367	1	0.489	0.99	0.982	1	1	0.862
TR7532|c3_g1_i10	AT1G42470.1 | Symbols: | Patched family protein | chr1:15926987-15935128 FORWARD LENGTH=1272	-1.96	-0.863	-0.198	0.0448	-0.946	-3.73	-0.485	-1.18	0.0691	-2.13	0.226	0.709	0.972	1	0.342	0.0006	0.797	0.397	1	0.000165
TR7532|c3_g1_i11	AT4G38350.1 | Symbols: | Patched family protein | chr4:17958324-17966846 REVERSE LENGTH=1273	-0.532	-0.554	0.318	0.0826	-0.378	-3.24	-0.147	-0.922	-0.305	-1.87	0.853	1	0.956	1	0.757	0.0649	0.981	0.911	1	0.0419
TR7532|c3_g1_i13	AT4G38350.2 | Symbols: | Patched family protein | chr4:17958324-17966846 REVERSE LENGTH=1297	-0.859	-0.348	-0.02	0.563	-1.05	-3.13	-0.23	-0.655	-0.0248	-2.22	0.728	1	1	1	0.269	0.0719	0.962	1	1	0.00465
TR7532|c3_g1_i2	AT4G38350.1 | Symbols: | Patched family protein | chr4:17958324-17966846 REVERSE LENGTH=1273	0.236	-0.0531	-0.0547	0.307	0.0369	-2.36	0.119	-1.06	0.342	-1.76	0.922	1	0.997	1	0.98	0.0389	0.975	0.362	1	0.000291
TR7532|c3_g1_i3	AT4G38350.1 | Symbols: | Patched family protein | chr4:17958324-17966846 REVERSE LENGTH=1273	-1.18	-0.929	-0.184	0.0624	-0.128	-3.34	-0.171	-0.682	-0.467	-2.02	0.527	0.596	0.974	1	0.938	0.00343	0.962	0.933	1	0.000365
TR7532|c3_g1_i4	AT4G38350.2 | Symbols: | Patched family protein | chr4:17958324-17966846 REVERSE LENGTH=1297	-1.04	-0.855	-0.295	0.496	-0.383	-2.88	-0.323	-0.668	-0.167	-1.72	0.577	0.82	0.949	1	0.701	0.0396	0.917	0.97	1	0.0138
TR7532|c3_g1_i5	AT4G38350.2 | Symbols: | Patched family protein | chr4:17958324-17966846 REVERSE LENGTH=1297	0.606	-0.00466	0.0682	0.365	0.178	-2.3	-0.0275	-0.98	0.384	-1.67	0.751	1	0.995	1	0.867	0.0854	0.998	0.553	1	0.00302
TR7532|c3_g1_i7	AT1G42470.1 | Symbols: | Patched family protein | chr1:15926987-15935128 FORWARD LENGTH=1272	-1.89	-0.379	-0.0724	0.465	-1.9	-3.3	0.187	-0.958	-0.38	-2.14	0.56	1	1	1	0.349	0.113	0.972	0.946	1	0.0324
TR7541|c5_g3_i6	AT3G27200.1 | Symbols: | Cupredoxin superfamily protein | chr3:10043738-10044340 REVERSE LENGTH=174	2	0.445	0.345	0.0934	1.11	-0.414	-0.0574	-0.181	0.119	-0.295	0.0288	0.985	0.87	1	0.0187	0.852	0.989	1	1	0.849
TR7554|c2_g1_i4	AT2G35630.1 | Symbols: MOR1, GEM1 | ARM repeat superfamily protein | chr2:14966828-14980361 FORWARD LENGTH=1978	-3.09	-1.04	-1.26	-0.479	-0.317	-1.56	-0.744	-0.127	-0.276	-0.412	0.0389	0.678	0.398	1	0.809	0.497	0.663	1	1	0.878
TR7554|c2_g2_i1	AT2G35630.1 | Symbols: MOR1, GEM1 | ARM repeat superfamily protein | chr2:14966828-14980361 FORWARD LENGTH=1978	-1.7	-0.196	-0.357	-0.102	-1.04	-0.917	-0.416	-0.181	-0.32	-0.000514	0.0438	1	0.82	1	0.0256	0.461	0.656	1	1	1
TR7554|c2_g2_i2	AT2G35630.1 | Symbols: MOR1, GEM1 | ARM repeat superfamily protein | chr2:14966828-14980361 FORWARD LENGTH=1978	-1.88	-0.261	-0.514	-0.179	-0.925	-0.671	0.00569	-0.569	0.084	-0.192	0.0265	1	0.652	1	0.0651	0.655	1	0.724	1	0.912
TR7554|c2_g3_i1	AT2G35630.1 | Symbols: MOR1, GEM1 | ARM repeat superfamily protein | chr2:14966828-14980361 FORWARD LENGTH=1978	-1.65	-0.37	-0.31	-0.141	-0.832	-0.488	-0.254	0.00804	-0.146	-0.0966	0.0333	0.98	0.848	1	0.0448	0.763	0.858	1	1	0.963
TR7554|c2_g5_i1	AT2G35630.1 | Symbols: MOR1, GEM1 | ARM repeat superfamily protein | chr2:14966828-14980361 FORWARD LENGTH=1978	-2.52	-0.596	-0.597	-0.443	-0.889	-1.01	-0.462	-0.37	-0.136	-0.0466	0.0211	0.918	0.732	1	0.187	0.588	0.772	1	1	0.994
TR7567|c0_g2_i2	AT5G43060.1 | Symbols: | Granulin repeat cysteine protease family protein | chr5:17269784-17272117 REVERSE LENGTH=463	4.09	0.79	1.78	1.42	0.107	1.26	0.694	0.516	0.411	-0.361	0.027	1	0.292	0.654	0.956	0.737	0.833	1	1	0.927
TR7567|c0_g2_i3	AT5G43060.1 | Symbols: | Granulin repeat cysteine protease family protein | chr5:17269784-17272117 REVERSE LENGTH=463	3.48	0.573	1.25	2.07	-0.421	1.66	0.469	0.963	0.0604	0.17	0.0409	1	0.487	0.131	0.746	0.543	0.894	0.86	1	0.97
TR7567|c0_g2_i4	AT5G43060.1 | Symbols: | Granulin repeat cysteine protease family protein | chr5:17269784-17272117 REVERSE LENGTH=463	3.6	0.418	1.91	1.22	0.0474	1.03	0.894	1	-0.231	-0.642	0.0266	1	0.112	0.699	0.981	0.759	0.646	0.822	1	0.767
TR7574|c2_g1_i1	AT1G15290.1 | Symbols: | Tetratricopeptide repeat (TPR)-like superfamily protein | chr1:5257327-5264814 REVERSE LENGTH=1608	-3.4	-0.591	-1.6	-0.15	-1.06	-1.69	-0.375	-0.0549	-0.324	-0.94	0.0364	1	0.265	1	0.258	0.527	0.923	1	1	0.584
TR7581|c1_g2_i1	AT4G14360.2 | Symbols: | S-adenosyl-L-methionine-dependent methyltransferases superfamily protein | chr4:8267869-8270191 REVERSE LENGTH=608	-1.62	-0.213	-0.144	-0.0921	-1.18	-1.01	-0.475	-0.077	-0.169	-0.286	0.0511	1	0.963	1	0.00317	0.418	0.603	1	1	0.83
TR7582|c2_g2_i2	AT5G53480.1 | Symbols: | ARM repeat superfamily protein | chr5:21714016-21716709 FORWARD LENGTH=870	-2.64	-0.514	-0.678	-0.221	-1.23	-0.0937	0.0781	0.228	-0.197	-0.203	0.0114	0.961	0.641	1	0.0553	0.987	0.985	1	1	0.935
TR7584|c1_g1_i2	AT1G40087.1 | Symbols: | Plant transposase (Ptta/En/Spm family) | chr1:14999762-15001868 REVERSE LENGTH=390	8.57	3.9	4.21	-0.0892	0.542	-9.81	-4.33	-1.67	-3.87	0.0523	0.0959	0.783	0.399	1	0.887	0.0388	0.271	1	0.501	1
TR7590|c1_g1_i3	No informative hit E<10-6	2.2	0.367	0.698	0.657	0.48	7.83	3.66	1.25	2.1	0.815	0.465	1	0.901	1	0.777	0.000105	0.00168	0.947	0.537	0.827
TR7590|c1_g1_i7	No informative hit E<10-6	3.77	0.885	0.871	1.88	0.135	7.81	3.07	1.94	1.78	1.02	0.19	1	0.876	0.831	0.959	0.000406	0.032	0.71	0.75	0.774
TR7592|c1_g3_i9	AT1G03650.1 | Symbols: | Acyl-CoA N-acyltransferases (NAT) superfamily protein | chr1:910249-911103 REVERSE LENGTH=158	1.15	-0.597	0.0543	-0.676	2.37	1.61	1.03	0.17	0.269	0.139	0.726	1	1	1	0.0434	0.669	0.691	1	1	0.984
TR7610|c0_g2_i10	AT1G51990.1 | Symbols: | O-methyltransferase family protein | chr1:19330949-19332667 FORWARD LENGTH=363	0.672	0.247	0.858	0.126	-0.559	2.55	-0.0981	2.66	-0.495	0.485	0.86	1	0.834	1	0.745	0.423	0.992	0.0323	1	0.918
TR7614|c2_g4_i1	AT5G09220.1 | Symbols: AAP2 | amino acid permease 2 | chr5:2866867-2868863 FORWARD LENGTH=493	1.97	0.127	0.628	0.432	0.786	0.611	0.115	-0.352	0.611	0.237	0.0486	1	0.647	0.991	0.147	0.775	0.972	1	0.793	0.908
TR7618|c0_g2_i4	AT5G12080.3 | Symbols: MSL10, ATMSL10 | mechanosensitive channel of small conductance-like 10 | chr5:3898182-3900923 REVERSE LENGTH=734	-3.18	-0.0847	-1.04	-0.415	-1.65	-1.42	-0.307	-0.047	-0.274	-0.795	0.0192	1	0.504	1	0.0304	0.494	0.919	1	1	0.572
TR7631|c1_g1_i3	AT2G30830.1 | Symbols: | 2-oxoglutarate (2OG) and Fe(II)-dependent oxygenase superfamily protein | chr2:13132707-13134284 REVERSE LENGTH=358	-2.01	-0.361	-0.0775	-0.257	-1.32	-0.69	-0.169	0.231	-0.575	-0.176	0.0497	1	0.991	1	0.0158	0.757	0.957	1	0.903	0.949
TR7632|c2_g1_i2	AT5G15650.1 | Symbols: RGP2, ATRGP2 | reversibly glycosylated polypeptide 2 | chr5:5092203-5094093 FORWARD LENGTH=360	-1.17	0.0234	-0.199	-0.00663	-0.984	-0.591	-0.231	-0.0112	-0.0977	-0.251	0.116	1	0.919	1	0.00319	0.641	0.854	1	1	0.819
TR7634|c6_g3_i3	AT3G15160.1 | Symbols: | unknown protein; Has 266 Blast hits to 264 proteins in 44 species: Archae - 0; Bacteria - 0; Metazoa - 58; Fungi - 0; Plants - 199; Viruses - 0; Other Eukaryotes - 9 (source: NCBI BLink). | chr3:5104582-5108279 FORWARD LENGTH=562	0.997	0.0144	0.116	-0.0111	0.878	0.14	-0.232	0.208	-0.0889	0.253	0.252	1	0.971	1	0.0188	0.956	0.879	1	1	0.839
TR7640|c0_g1_i5	AT3G48250.1 | Symbols: | Pentatricopeptide repeat (PPR) superfamily protein | chr3:17870064-17871929 REVERSE LENGTH=621	1.26	0.672	-0.757	-0.368	1.71	-0.023	-0.527	0.117	0.408	-0.0215	0.506	0.985	0.704	1	0.028	1	0.804	1	1	1
TR7641|c1_g1_i2	AT2G42910.1 | Symbols: | Phosphoribosyltransferase family protein | chr2:17856396-17858394 FORWARD LENGTH=337	-2.71	-0.46	-0.222	-0.891	-1.14	-0.504	0.0548	0.382	-0.54	-0.401	0.00104	0.971	0.941	0.303	0.0196	0.811	0.991	1	0.844	0.76
TR7641|c1_g1_i3	AT2G42910.1 | Symbols: | Phosphoribosyltransferase family protein | chr2:17856396-17858394 FORWARD LENGTH=337	-3.72	-1.32	-0.28	-0.876	-1.24	-1.01	-0.0591	0.257	-0.56	-0.652	0.00228	0.274	0.949	0.701	0.131	0.675	0.993	1	0.985	0.695
TR7663|c2_g1_i6	AT5G37850.2 | Symbols: SOS4 | pfkB-like carbohydrate kinase family protein | chr5:15065621-15068783 FORWARD LENGTH=309	1.82	0.787	0.743	0.0885	0.203	0.608	-0.178	0.368	-0.181	0.599	0.0481	0.429	0.437	1	0.785	0.753	0.94	1	1	0.556
TR7681|c1_g1_i1	AT3G05030.1 | Symbols: NHX2, ATNHX2 | sodium hydrogen exchanger 2 | chr3:1393456-1396784 REVERSE LENGTH=546	-2.53	-0.822	-0.319	-0.319	-1.07	-1.37	-0.562	-0.252	-0.0863	-0.466	0.0083	0.432	0.89	1	0.0919	0.283	0.553	1	1	0.709
TR7684|c1_g1_i3	AT2G38410.1 | Symbols: | ENTH/VHS/GAT family protein | chr2:16086912-16090047 REVERSE LENGTH=671	-0.668	0.234	0.0425	0.244	-1.19	0.0565	-0.0793	0.17	0.175	-0.209	0.611	1	0.998	1	0.0121	0.996	0.983	1	1	0.912
TR7694|c0_g1_i4	AT1G73805.1 | Symbols: | Calmodulin binding protein-like | chr1:27745761-27749178 REVERSE LENGTH=451	6.95	1.23	2.33	1.49	1.9	4	0.667	0.755	1.36	1.22	0.0104	0.992	0.534	0.881	0.253	0.299	0.926	1	0.92	0.752
TR7698|c1_g2_i10	AT3G08640.1 | Symbols: | Protein of unknown function (DUF3411) | chr3:2622992-2624005 FORWARD LENGTH=337	-1.73	0.106	-0.431	-0.0665	-1.34	-1.58	-0.466	-0.0408	-0.557	-0.516	0.162	1	0.857	1	0.0241	0.302	0.786	1	0.94	0.715
TR7698|c1_g2_i2	AT3G08640.1 | Symbols: | Protein of unknown function (DUF3411) | chr3:2622992-2624005 FORWARD LENGTH=337	-0.866	0.158	-0.297	-0.338	-0.388	-2.46	-0.978	-0.285	-0.309	-0.885	0.552	1	0.924	1	0.599	0.0232	0.205	1	1	0.284
TR7698|c1_g2_i3	AT3G08640.1 | Symbols: | Protein of unknown function (DUF3411) | chr3:2622992-2624005 FORWARD LENGTH=337	-2.55	-0.878	-0.129	-0.375	-1.17	-1.18	-0.333	-0.257	-0.356	-0.23	0.0117	0.473	0.98	1	0.0484	0.474	0.865	1	1	0.914
TR7698|c1_g2_i6	AT3G08640.1 | Symbols: | Protein of unknown function (DUF3411) | chr3:2622992-2624005 FORWARD LENGTH=337	-0.811	0.319	0.243	0.775	-2.15	-1.41	-0.579	-0.156	0.0704	-0.748	0.636	1	0.954	0.748	0.000144	0.457	0.732	1	1	0.534
TR7698|c1_g2_i7	AT3G08640.1 | Symbols: | Protein of unknown function (DUF3411) | chr3:2622992-2624005 FORWARD LENGTH=337	-1.27	0.135	-0.266	0.171	-1.31	-2.17	-1	-0.322	0.00664	-0.858	0.42	1	0.95	1	0.0486	0.151	0.324	1	1	0.457
TR7698|c1_g5_i1	AT3G08640.1 | Symbols: | Protein of unknown function (DUF3411) | chr3:2622992-2624005 FORWARD LENGTH=337	-2.03	-0.469	-0.581	-0.422	-0.56	-2.22	-0.436	0.0845	-1	-0.86	0.0459	0.972	0.671	0.995	0.434	0.0229	0.751	1	0.249	0.271
TR7709|c2_g1_i7	AT2G07680.1 | Symbols: ATMRP11, MRP11, ABCC13 | multidrug resistance-associated protein 11 | chr2:3514774-3522491 FORWARD LENGTH=1404	-2.51	-0.376	-0.642	-1	-0.486	-0.576	-0.366	-0.201	-0.0153	0.00594	0.0487	1	0.762	0.467	0.582	0.838	0.88	1	1	1
TR7709|c2_g1_i8	AT2G07680.1 | Symbols: ATMRP11, MRP11, ABCC13 | multidrug resistance-associated protein 11 | chr2:3514774-3522491 FORWARD LENGTH=1404	-2.35	-0.62	-0.999	-0.709	-0.019	-0.217	-0.672	-0.145	0.289	0.311	0.0379	0.937	0.422	0.709	0.992	0.952	0.555	1	1	0.868
TR7711|c3_g1_i1	AT5G15210.1 | Symbols: ATHB30, ZFHD3, HB30, ZHD8 | homeobox protein 30 | chr5:4937874-4938689 REVERSE LENGTH=271	-1.96	-0.0929	-0.522	-0.419	-0.925	-0.782	-0.0988	-0.0408	-0.384	-0.258	0.0496	1	0.749	0.954	0.112	0.652	0.976	1	0.981	0.892
TR7712|c0_g1_i1	AT3G16060.1 | Symbols: | ATP binding microtubule motor family protein | chr3:5447503-5451196 FORWARD LENGTH=684	-2.17	-0.427	-0.329	0.171	-1.58	-0.632	-0.354	-0.00562	-0.114	-0.158	0.0391	0.981	0.879	1	0.018	0.731	0.79	1	1	0.951
TR7716|c1_g1_i2	No informative hit E<10-6	-0.799	0.168	0.143	-0.174	-0.936	-1.23	-0.813	0.24	-0.478	-0.18	0.476	1	0.965	1	0.0403	0.302	0.157	1	0.884	0.927
TR7719|c0_g1_i1	AT4G15093.1 | Symbols: | catalytic LigB subunit of aromatic ring-opening dioxygenase family | chr4:8618454-8619472 FORWARD LENGTH=269	4.13	1.53	0.943	1	0.657	0.647	0.735	0.143	-0.499	0.269	0.0117	0.432	0.737	0.847	0.563	0.885	0.778	1	1	0.949
TR7721|c1_g1_i1	AT1G67856.1 | Symbols: | RING/U-box superfamily protein | chr1:25442486-25442887 FORWARD LENGTH=133	-0.992	-0.184	-0.191	-0.595	-0.0215	-2.52	-0.145	-0.717	-0.685	-0.976	0.519	1	0.968	0.924	0.99	0.0305	0.969	0.857	0.823	0.245
TR7741|c0_g1_i3	AT5G11270.1 | Symbols: OCP3 | overexpressor of cationic peroxidase 3 | chr5:3595557-3597076 REVERSE LENGTH=354	0.215	-0.688	0.109	0.12	0.673	4.15	1.14	0.868	0.855	1.28	0.963	1	0.994	1	0.551	0.0125	0.521	0.969	0.94	0.389
TR7741|c0_g1_i5	AT5G11270.1 | Symbols: OCP3 | overexpressor of cationic peroxidase 3 | chr5:3595557-3597076 REVERSE LENGTH=354	2.59	0.434	0.741	0.164	1.25	1.34	0.773	-0.426	0.745	0.248	0.0227	1	0.647	1	0.0301	0.466	0.519	1	0.7	0.919
TR7746|c4_g2_i7	AT1G13560.1 | Symbols: AAPT1, ATAAPT1 | aminoalcoholphosphotransferase 1 | chr1:4638834-4641691 REVERSE LENGTH=389	2.37	0.458	0.71	0.399	0.808	-0.661	-0.264	-0.4	-0.482	0.485	0.0085	0.989	0.487	0.995	0.144	0.723	0.895	1	0.882	0.707
TR7750|c5_g1_i1	AT5G23540.1 | Symbols: | Mov34/MPN/PAD-1 family protein | chr5:7937772-7939339 FORWARD LENGTH=308	-0.0189	0.65	0.818	0.656	-2.14	0.63	0.47	0.453	0.436	-0.729	1	0.972	0.678	0.955	0.00317	0.842	0.837	1	1	0.632
TR7750|c5_g1_i2	AT5G23540.1 | Symbols: | Mov34/MPN/PAD-1 family protein | chr5:7937772-7939339 FORWARD LENGTH=308	-2.5	-0.499	-0.58	-0.738	-0.688	-0.941	-0.493	0.0456	-0.859	0.366	0.0104	0.971	0.714	0.636	0.278	0.594	0.697	1	0.475	0.826
TR7755|c0_g1_i3	AT3G52190.1 | Symbols: PHF1 | phosphate transporter traffic facilitator1 | chr3:19354117-19356910 REVERSE LENGTH=398	-0.364	0.294	0.26	-0.172	-0.746	-1.98	1.62	-3.96	0.239	0.122	0.957	1	0.986	1	0.695	0.711	0.583	0.0461	1	0.994
TR7777|c0_g2_i1	AT3G50560.1 | Symbols: | NAD(P)-binding Rossmann-fold superfamily protein | chr3:18761247-18763835 REVERSE LENGTH=272	3.94	0.737	1.43	0.527	1.25	1.08	0.577	0.43	-0.262	0.338	0.000292	0.884	0.16	0.996	0.0677	0.623	0.726	1	1	0.885
TR7777|c0_g2_i3	AT3G50560.1 | Symbols: | NAD(P)-binding Rossmann-fold superfamily protein | chr3:18761247-18763835 REVERSE LENGTH=272	3.12	0.749	0.636	0.229	1.51	0.709	0.51	0.278	-0.29	0.211	0.00893	0.85	0.772	1	0.0283	0.783	0.766	1	1	0.944
TR7777|c0_g2_i5	AT3G50560.1 | Symbols: | NAD(P)-binding Rossmann-fold superfamily protein | chr3:18761247-18763835 REVERSE LENGTH=272	2.96	1.05	0.403	0.267	1.25	0.346	0.201	-0.00889	0.0928	0.0608	0.0281	0.63	0.919	1	0.097	0.93	0.957	1	1	0.993
TR7780|c1_g2_i4	AT1G60710.1 | Symbols: ATB2 | NAD(P)-linked oxidoreductase superfamily protein | chr1:22355073-22356627 REVERSE LENGTH=345	2.29	1.08	0.78	1.07e-05	0.424	10.2	3.21	2.01	1.85	3.14	0.553	1	0.938	1	0.851	0.00279	0.304	0.902	0.985	0.162
TR7780|c1_g2_i5	AT1G60710.1 | Symbols: ATB2 | NAD(P)-linked oxidoreductase superfamily protein | chr1:22355073-22356627 REVERSE LENGTH=345	2.64	-0.49	1.74	1.19	0.197	12.3	3.02	3.38	3.27	2.65	0.474	1	0.736	1	0.942	1.36e-05	0.266	0.378	0.478	0.247
TR7780|c1_g2_i6	AT1G60710.1 | Symbols: ATB2 | NAD(P)-linked oxidoreductase superfamily protein | chr1:22355073-22356627 REVERSE LENGTH=345	2.83	-0.122	2.09	0.749	0.113	14.5	5.36	2.22	4.64	2.31	0.417	1	0.62	1	0.97	3.79e-06	0.0435	0.823	0.246	0.373
TR7780|c1_g2_i7	AT1G60710.1 | Symbols: ATB2 | NAD(P)-linked oxidoreductase superfamily protein | chr1:22355073-22356627 REVERSE LENGTH=345	2.44	0.643	0.803	-0.413	1.41	16.9	4.42	5.77	5.03	1.68	0.55	1	0.937	1	0.432	1.63e-06	0.231	0.102	0.176	0.669
TR7783|c1_g1_i3	AT1G55900.2 | Symbols: TIM50 | Haloacid dehalogenase-like hydrolase (HAD) superfamily protein | chr1:20903163-20905420 FORWARD LENGTH=370	3.47	1.13	0.66	0.999	0.676	4.38	0.727	0.746	1.57	1.34	0.0566	0.812	0.797	0.774	0.677	0.0192	0.786	0.961	0.415	0.642
TR7794|c1_g2_i1	AT5G04740.1 | Symbols: | ACT domain-containing protein | chr5:1368713-1371391 REVERSE LENGTH=301	0.148	0.0757	0.0852	-0.239	0.226	-1.53	-0.444	-0.164	-0.182	-0.739	0.927	1	0.981	1	0.691	0.0456	0.587	1	1	0.136
TR7799|c1_g1_i2	AT3G62240.1 | Symbols: | RING/U-box superfamily protein | chr3:23033592-23036653 REVERSE LENGTH=812	-2.87	-0.273	-1.17	-0.564	-0.864	-0.153	0.0234	0.0455	0.275	-0.497	0.0213	1	0.39	0.991	0.241	0.976	0.999	1	1	0.752
TR7799|c1_g1_i5	AT3G62240.1 | Symbols: | RING/U-box superfamily protein | chr3:23033592-23036653 REVERSE LENGTH=812	-3.57	-0.463	-1.37	-0.432	-1.3	-0.36	-0.00534	-0.0238	-0.305	-0.0266	0.00806	1	0.359	1	0.0831	0.928	1	1	1	1
TR7809|c3_g5_i9	AT3G13460.1 | Symbols: ECT2 | evolutionarily conserved C-terminal region 2 | chr3:4385274-4388220 REVERSE LENGTH=667	-1.21	-0.0391	-0.284	0.215	-1.1	-0.454	-0.684	0.124	0.067	0.0392	0.304	1	0.917	1	0.0418	0.847	0.42	1	1	0.995
TR7816|c0_g2_i1	AT4G21350.1 | Symbols: B80, PUB8 | plant U-box 8 | chr4:11356143-11357267 REVERSE LENGTH=374	-1.67	-0.324	-0.438	-0.329	-0.583	-1.16	0.286	-0.316	-0.499	-0.63	0.0457	1	0.765	1	0.202	0.298	0.828	1	0.842	0.264
TR7818|c0_g1_i4	AT1G09830.1 | Symbols: | Glycinamide ribonucleotide (GAR) synthetase | chr1:3192783-3194936 REVERSE LENGTH=532	-1.64	0.136	-0.311	-0.0815	-1.39	0.564	0.251	0.218	-0.00392	0.0988	0.194	1	0.921	1	0.0334	0.812	0.914	1	1	0.979
TR7829|c0_g1_i2	AT1G01140.1 | Symbols: CIPK9, SnRK3.12, PKS6 | CBL-interacting protein kinase 9 | chr1:64398-67512 REVERSE LENGTH=447	0.0649	-0.0682	-0.0781	-0.229	0.44	0.0411	1.1	-0.557	-0.491	-0.0124	0.992	1	0.992	1	0.46	1	0.0394	0.926	0.995	1
TR7835|c0_g2_i7	AT3G53110.1 | Symbols: LOS4 | P-loop containing nucleoside triphosphate hydrolases superfamily protein | chr3:19687968-19690423 FORWARD LENGTH=496	-3.86	-0.347	-1.37	-0.714	-1.42	-0.95	-0.0964	-0.0191	-0.408	-0.426	0.0189	1	0.431	0.978	0.227	0.782	0.987	1	1	0.907
TR7836|c0_g1_i4	AT1G31817.1 | Symbols: NFD3 | Ribosomal L18p/L5e family protein | chr1:11414932-11416356 REVERSE LENGTH=314	0.244	0.435	-0.607	-0.17	0.586	4.03	1.79	0.48	0.899	0.859	0.956	1	0.878	1	0.632	0.0147	0.0862	1	0.922	0.692
TR7841|c2_g1_i2	AT3G08760.1 | Symbols: ATSIK | Protein kinase superfamily protein | chr3:2658129-2659984 REVERSE LENGTH=557	-3.46	0.196	-0.252	0.0193	-3.42	0.44	-0.193	-0.34	-0.413	1.39	0.171	1	0.972	1	0.0432	0.931	0.975	1	1	0.373
TR7847|c1_g1_i1	AT5G24890.1 | Symbols: | unknown protein; FUNCTIONS IN: molecular_function unknown; INVOLVED IN: biological_process unknown; LOCATED IN: cellular_component unknown; EXPRESSED IN: 24 plant structures; EXPRESSED DURING: 13 growth stages; BEST Arabidopsis thaliana protein match is: unknown protein (TAIR:AT2G24550.1); Has 1807 Blast hits to 1807 proteins in 277 species: Archae - 0; Bacteria - 0; Meta…	2.15	0.311	0.477	-0.135	1.5	-0.184	-0.451	0.0869	0.388	-0.207	0.162	1	0.878	1	0.0418	0.975	0.897	1	1	0.961
TR7853|c1_g1_i7	AT4G10610.1 | Symbols: RBP37, ATRBP37, CID12 | CTC-interacting domain 12 | chr4:6557336-6559143 FORWARD LENGTH=336	-1.4	-0.299	-0.231	-0.144	-0.725	-0.917	-0.218	-0.0244	-0.288	-0.387	0.0191	0.969	0.865	1	0.0241	0.266	0.838	1	0.954	0.545
TR7855|c2_g2_i2	No informative hit E<10-6	-3.49	-0.41	-1.09	-1.1	-0.892	-2.01	-0.23	-0.35	-0.864	-0.565	0.0126	1	0.548	0.444	0.398	0.217	0.944	1	0.621	0.775
TR7855|c2_g2_i3	AT2G38970.1 | Symbols: | Zinc finger (C3HC4-type RING finger) family protein | chr2:16274135-16276651 FORWARD LENGTH=692	-0.49	0.253	1.07	-0.455	-1.36	3.24	3.01	1.67	-1.4	-0.0403	0.953	1	0.902	1	0.604	0.369	0.0426	0.806	0.78	1
TR7857|c1_g1_i7	AT2G20300.1 | Symbols: ALE2 | Protein kinase superfamily protein | chr2:8756475-8759845 REVERSE LENGTH=744	-4.01	-0.867	-0.701	-0.369	-2.08	-0.704	-0.233	-0.159	-0.169	-0.142	0.0365	0.921	0.843	1	0.138	0.855	0.956	1	1	0.979
TR7861|c1_g1_i9	AT1G06680.1 | Symbols: PSBP-1, OEE2, PSII-P, OE23 | photosystem II subunit P-1 | chr1:2047940-2049186 FORWARD LENGTH=263	-1.29	0.0431	-0.485	0.0468	-0.899	-0.298	0.187	-0.176	-0.336	0.0266	0.145	1	0.687	1	0.0274	0.892	0.925	1	0.999	0.996
TR7873|c0_g1_i1	AT1G64140.1 | Symbols: | BEST Arabidopsis thaliana protein match is: loricrin-related (TAIR:AT5G64550.1); Has 3596 Blast hits to 2004 proteins in 150 species: Archae - 0; Bacteria - 54; Metazoa - 1597; Fungi - 38; Plants - 513; Viruses - 9; Other Eukaryotes - 1385 (source: NCBI BLink). | chr1:23804069-23806009 REVERSE LENGTH=646	-0.646	0.15	-0.0936	-0.00988	-0.693	0.361	0.266	0.219	-0.0778	-0.0452	0.426	1	0.974	1	0.0318	0.802	0.792	1	1	0.983
TR7876|c1_g1_i2	AT4G24060.1 | Symbols: | Dof-type zinc finger DNA-binding family protein | chr4:12503970-12505417 FORWARD LENGTH=342	-2.37	0.212	-0.68	-0.988	-0.919	-0.534	-0.129	0.314	-0.288	-0.431	0.0294	1	0.673	0.322	0.147	0.837	0.971	1	1	0.792
TR7891|c1_g2_i1	AT3G13560.2 | Symbols: | O-Glycosyl hydrolases family 17 protein | chr3:4425484-4427284 REVERSE LENGTH=505	-4.57	-1.03	-1.24	-0.823	-1.48	-2.68	-0.781	-0.44	-0.532	-0.93	0.0228	0.962	0.655	1	0.24	0.315	0.799	1	1	0.711
TR7891|c1_g2_i2	AT3G13560.2 | Symbols: | O-Glycosyl hydrolases family 17 protein | chr3:4425484-4427284 REVERSE LENGTH=505	-1.04	-0.0488	0.0759	0.0385	-1.1	-0.589	-0.471	-0.0365	-0.104	0.0231	0.353	1	0.989	1	0.0255	0.751	0.677	1	1	0.998
TR7894|c0_g4_i8	AT4G18905.1 | Symbols: | Transducin/WD40 repeat-like superfamily protein | chr4:10360234-10362991 FORWARD LENGTH=494	9.1	0.196	-0.99	1.86	8.04	6.11	0	1.16	4.95	0	0.149	1	0.961	1	0.0449	1	1	1	0.581	1
TR7913|c0_g1_i4	AT3G52880.1 | Symbols: ATMDAR1, MDAR1 | monodehydroascorbate reductase 1 | chr3:19601477-19604366 REVERSE LENGTH=434	2.5	0.91	0.675	0.185	0.729	1.45	0.739	0.288	0.307	0.119	3.24e-05	0.0443	0.293	1	0.058	0.0675	0.0981	1	0.992	0.949
TR7913|c0_g1_i5	AT3G52880.1 | Symbols: ATMDAR1, MDAR1 | monodehydroascorbate reductase 1 | chr3:19601477-19604366 REVERSE LENGTH=434	1.79	0.72	0.589	0.00467	0.479	1.79	0.988	0.349	0.26	0.194	0.00966	0.279	0.439	1	0.278	0.00978	0.00509	0.979	1	0.896
TR7913|c0_g1_i7	AT3G52880.1 | Symbols: ATMDAR1, MDAR1 | monodehydroascorbate reductase 1 | chr3:19601477-19604366 REVERSE LENGTH=434	0.769	0.603	0.359	0.165	-0.358	1.69	1.36	0.111	0.294	-0.0822	0.567	0.827	0.862	1	0.63	0.14	0.00218	1	1	0.98
TR7913|c0_g1_i9	AT3G52880.1 | Symbols: ATMDAR1, MDAR1 | monodehydroascorbate reductase 1 | chr3:19601477-19604366 REVERSE LENGTH=434	2.14	0.942	0.562	-0.242	0.881	2.33	1.25	0.135	0.547	0.402	0.0277	0.343	0.713	1	0.0973	0.0147	0.0136	1	0.89	0.783
TR7919|c1_g1_i1	AT5G23860.2 | Symbols: TUB8 | tubulin beta 8 | chr5:8042962-8044528 FORWARD LENGTH=449	-2.12	-0.169	-0.526	-0.232	-1.19	-0.723	-0.487	0.272	-0.0617	-0.446	0.0408	1	0.755	1	0.0247	0.726	0.733	1	1	0.752
TR7919|c2_g2_i3	AT5G12250.1 | Symbols: TUB6 | beta-6 tubulin | chr5:3961317-3962971 REVERSE LENGTH=449	-0.0994	1.09	0.115	0.194	-1.5	0.254	0.968	-0.0571	-0.418	-0.239	0.988	0.644	0.99	1	0.0459	0.959	0.467	1	1	0.944
TR7931|c0_g1_i8	No informative hit E<10-6	1.25	-0.152	0.516	-0.257	1.14	0.333	0.0337	-0.158	0.353	0.104	0.341	1	0.779	1	0.0449	0.915	0.997	1	1	0.979
TR7939|c1_g1_i8	AT3G55610.1 | Symbols: P5CS2 | delta 1-pyrroline-5-carboxylate synthase 2 | chr3:20624278-20628989 REVERSE LENGTH=726	-0.472	0.175	-0.382	-0.0606	-0.205	1.71	1.32	0.575	0.0684	-0.249	0.753	1	0.847	1	0.78	0.115	0.00327	0.866	1	0.886
TR7946|c0_g1_i2	AT5G25930.1 | Symbols: | Protein kinase family protein with leucine-rich repeat domain | chr5:9050880-9053978 FORWARD LENGTH=1005	3.45	1.06	1.01	0.332	1.04	4.26	0.888	1.04	0.979	1.35	0.148	0.917	0.78	1	0.572	0.0344	0.743	0.946	0.909	0.538
TR7956|c0_g1_i2	AT4G13250.1 | Symbols: NYC1 | NAD(P)-binding Rossmann-fold superfamily protein | chr4:7684417-7686691 REVERSE LENGTH=496	2.2	0.666	0.703	0.421	0.405	1.38	0.43	0.323	0.539	0.0924	0.00767	0.657	0.458	0.958	0.467	0.221	0.716	1	0.81	0.971
TR7961|c0_g2_i7	AT1G15440.1 | Symbols: PWP2, ATPWP2 | periodic tryptophan protein 2 | chr1:5306159-5309460 REVERSE LENGTH=900	-2.34	-0.252	-0.705	0.145	-1.53	-0.606	-0.666	0.313	0.0266	-0.28	0.0482	1	0.527	1	0.0712	0.77	0.355	1	1	0.901
TR7962|c4_g1_i11	No informative hit E<10-6	2.1	0.922	0.445	-0.271	1.01	1.06	0.366	-0.0185	0.393	0.32	0.0331	0.401	0.824	1	0.0403	0.524	0.829	1	1	0.856
TR7965|c3_g5_i1	AT2G13770.1 | Symbols: | CONTAINS InterPro DOMAIN/s: Putative harbinger transposase-derived nuclease (InterPro:IPR006912); Has 451 Blast hits to 352 proteins in 33 species: Archae - 0; Bacteria - 0; Metazoa - 28; Fungi - 8; Plants - 388; Viruses - 0; Other Eukaryotes - 27 (source: NCBI BLink). | chr2:5736603-5737847 FORWARD LENGTH=343	6.64	1.93	2.73	1.47	0.508	12.4	4.91	2.72	0.653	4.11	0.216	1	0.74	1	0.903	0.00984	0.206	0.928	1	0.357
TR7965|c3_g5_i6	AT2G13770.1 | Symbols: | CONTAINS InterPro DOMAIN/s: Putative harbinger transposase-derived nuclease (InterPro:IPR006912); Has 451 Blast hits to 352 proteins in 33 species: Archae - 0; Bacteria - 0; Metazoa - 28; Fungi - 8; Plants - 388; Viruses - 0; Other Eukaryotes - 27 (source: NCBI BLink). | chr2:5736603-5737847 FORWARD LENGTH=343	6.66	1.65	2.71	2.24	0.0641	13.5	4.12	1.65	0.427	7.25	0.187	1	0.724	0.954	0.993	0.00456	0.296	1	1	0.0546
TR7987|c22_g1_i2	AT1G26770.1 | Symbols: ATEXPA10, AT-EXP10, ATEXP10, ATHEXP ALPHA 1.1, EXP10, EXPA10 | expansin A10 | chr1:9259805-9260792 FORWARD LENGTH=249	1.61	0.212	0.527	0.729	0.14	1.82	0.726	0.32	0.097	0.679	0.0747	1	0.676	0.467	0.846	0.0467	0.275	1	1	0.334
TR7995|c4_g1_i1	No informative hit E<10-6	-9.11	-3.01	-0.417	-2.79	-2.89	0.54	-0.0673	-0.102	-0.611	1.32	0.00212	0.371	0.974	0.463	0.143	0.963	0.998	1	1	0.786
TR7999|c10_g2_i1	AT4G23160.1 | Symbols: CRK8 | cysteine-rich RLK (RECEPTOR-like protein kinase) 8 | chr4:12129485-12134086 FORWARD LENGTH=1262	0.654	0.156	-0.419	-0.153	1.07	-0.155	-0.203	0.103	-0.14	0.0856	0.661	1	0.841	1	0.0428	0.968	0.938	1	1	0.979
TR7999|c10_g2_i2	AT5G47120.1 | Symbols: ATBI-1, BI-1, ATBI1, BI1 | BAX inhibitor 1 | chr5:19136071-19137585 FORWARD LENGTH=247	1.69	0.00845	0.299	-0.221	1.6	0.3	-0.275	0.282	-0.00695	0.3	0.12	1	0.913	1	0.00076	0.917	0.9	1	1	0.873
TR8008|c5_g1_i1	No informative hit E<10-6	2.93	0.307	0.29	0.0534	2.28	2.29	0.49	0.907	0.628	0.261	0.199	1	0.974	1	0.0269	0.497	0.922	1	1	0.964
TR8010|c9_g2_i1	AT4G23160.1 | Symbols: CRK8 | cysteine-rich RLK (RECEPTOR-like protein kinase) 8 | chr4:12129485-12134086 FORWARD LENGTH=1262	0.0334	0.444	-0.191	0.135	-0.355	-4.37	-1.47	-0.161	-1.46	-1.28	1	1	0.983	1	0.796	0.0172	0.327	1	0.558	0.471
TR8023|c11_g4_i2	AT5G64510.1 | Symbols: TIN1 | unknown protein; FUNCTIONS IN: molecular_function unknown; INVOLVED IN: biological_process unknown; LOCATED IN: endomembrane system; EXPRESSED IN: 17 plant structures; EXPRESSED DURING: 10 growth stages; Has 35333 Blast hits to 34131 proteins in 2444 species: Archae - 798; Bacteria - 22429; Metazoa - 974; Fungi - 991; Plants - 531; Viruses - 0; Other Eukaryotes - 961…	0.379	0.0494	0.0217	0.149	0.158	0.662	0.866	-0.493	0.0443	0.244	0.726	1	1	1	0.764	0.582	0.0156	0.725	1	0.826
TR8023|c7_g1_i3	No informative hit E<10-6	-3.83	-1.51	-0.793	-1.56	0.0372	-1.36	-0.243	-0.253	-0.829	-0.0355	0.0242	0.48	0.806	0.402	0.988	0.678	0.964	1	0.958	1
TR8033|c9_g1_i8	No informative hit E<10-6	-3.53	0.043	0.493	-0.433	-3.63	-1.53	-1.24	-0.222	-0.971	0.909	0.17	1	0.942	1	0.00814	0.719	0.604	1	0.981	0.771
TR8051|c2_g1_i6	AT3G03860.1 | Symbols: ATAPRL5, APRL5 | APR-like 5 | chr3:992465-994315 FORWARD LENGTH=300	0.772	0.484	0.436	0.0816	-0.23	3.62	1.69	0.44	1.49	0.00156	0.811	1	0.94	1	0.916	0.0155	0.0659	1	0.343	1
TR8051|c2_g1_i7	AT3G03860.1 | Symbols: ATAPRL5, APRL5 | APR-like 5 | chr3:992465-994315 FORWARD LENGTH=300	-3.41	-0.802	-0.689	-0.349	-1.58	-0.709	-0.343	-0.444	-0.027	0.105	0.0114	0.86	0.773	1	0.0458	0.816	0.904	1	1	0.981
TR8051|c2_g1_i8	AT3G03860.1 | Symbols: ATAPRL5, APRL5 | APR-like 5 | chr3:992465-994315 FORWARD LENGTH=300	-2.74	-0.733	-0.811	-0.0233	-1.18	-1.2	-0.471	-0.181	-0.17	-0.382	0.0283	0.842	0.659	1	0.105	0.561	0.796	1	1	0.861
TR8079|c4_g1_i3	No informative hit E<10-6	-8.19	-3.75	-3.81	-0.81	0.175	6.17	1.12	1.73	0.416	2.91	0.0216	0.288	0.279	1	0.963	0.209	0.865	1	1	0.444
TR8101|c3_g3_i3	AT5G19440.1 | Symbols: | NAD(P)-binding Rossmann-fold superfamily protein | chr5:6556493-6558123 FORWARD LENGTH=326	0.175	0.2	0.105	-0.241	0.111	2.14	0.2	0.551	0.677	0.711	0.922	1	0.979	1	0.879	0.00538	0.921	0.815	0.5	0.247
TR8104|c0_g2_i2	AT1G60690.1 | Symbols: | NAD(P)-linked oxidoreductase superfamily protein | chr1:22349892-22351668 REVERSE LENGTH=345	-1.52	-0.299	-1.51	-0.078	0.366	-8.43	-0.759	-3.52	0.702	-4.86	0.838	1	0.804	1	0.902	0.182	0.908	0.779	1	0.0191
TR8104|c0_g2_i5	AT1G60710.1 | Symbols: ATB2 | NAD(P)-linked oxidoreductase superfamily protein | chr1:22355073-22356627 REVERSE LENGTH=345	-0.599	0.247	-0.636	-0.00407	-0.207	-4.87	-0.275	-0.272	-1.29	-3.03	0.892	1	0.907	1	0.918	0.0239	0.963	1	0.944	0.00179
TR8119|c0_g1_i1	AT2G20390.1 | Symbols: | unknown protein; Has 50 Blast hits to 50 proteins in 18 species: Archae - 0; Bacteria - 2; Metazoa - 0; Fungi - 0; Plants - 48; Viruses - 0; Other Eukaryotes - 0 (source: NCBI BLink). | chr2:8796475-8798142 REVERSE LENGTH=183	1.14	0.311	0.359	0.284	0.189	1.91	0.135	0.518	0.839	0.415	0.278	1	0.836	1	0.812	0.0437	0.961	0.881	0.332	0.758
TR8120|c5_g2_i2	AT1G65870.1 | Symbols: | Disease resistance-responsive (dirigent-like protein) family protein | chr1:24503624-24504193 FORWARD LENGTH=189	-0.992	-0.171	-0.242	-0.275	-0.305	-3.36	-0.464	-1.52	-0.773	-0.609	0.567	1	0.959	1	0.753	0.00389	0.833	0.134	0.805	0.712
TR8132|c1_g1_i6	AT5G48680.1 | Symbols: | Sterile alpha motif (SAM) domain-containing protein | chr5:19744725-19746053 REVERSE LENGTH=206	-0.811	-0.135	0.275	-0.029	-0.922	1.3	0.49	0.242	0.396	0.17	0.44	1	0.888	1	0.0303	0.224	0.589	1	0.949	0.929
TR8135|c1_g1_i4	AT3G59510.1 | Symbols: | Leucine-rich repeat (LRR) family protein | chr3:21988453-21989712 REVERSE LENGTH=419	0.218	-0.244	-0.879	0.854	0.487	1.31	0	-3.82	5.14	0	0.961	1	0.757	0.944	0.676	1	1	0.576	0.0314	1
TR8149|c0_g2_i1	AT5G48655.3 | Symbols: | RING/U-box superfamily protein | chr5:19731575-19732486 REVERSE LENGTH=203	-1.98	0.229	-0.429	0.543	-2.32	-0.223	-0.261	-0.369	-0.0914	0.498	0.221	1	0.895	0.999	0.00466	0.964	0.94	1	1	0.845
TR8159|c5_g1_i6	AT5G10730.1 | Symbols: | NAD(P)-binding Rossmann-fold superfamily protein | chr5:3390822-3392947 REVERSE LENGTH=287	2.01	0.639	0.413	0.401	0.552	1.1	0.674	0.197	-0.0218	0.252	0.0125	0.6	0.786	0.984	0.23	0.382	0.282	1	1	0.858
TR8163|c0_g1_i3	AT5G27450.3 | Symbols: MK | mevalonate kinase | chr5:9691051-9692975 FORWARD LENGTH=378	-0.674	-0.0981	0.394	0.00384	-0.974	-2.36	0.247	-0.37	-0.0492	-2.19	0.668	1	0.867	1	0.106	0.0253	0.918	1	1	3.07e-07
TR8163|c0_g1_i4	AT5G27450.3 | Symbols: MK | mevalonate kinase | chr5:9691051-9692975 FORWARD LENGTH=378	-0.741	-0.181	0.32	-0.178	-0.701	-2.82	-0.0297	-0.387	-0.138	-2.27	0.632	1	0.904	1	0.366	0.000978	0.997	1	1	2e-08
TR8163|c0_g1_i5	AT5G27450.3 | Symbols: MK | mevalonate kinase | chr5:9691051-9692975 FORWARD LENGTH=378	0.415	0.134	0.459	0.0176	-0.196	-2.38	0.0107	-0.464	-0.0021	-1.93	0.774	1	0.752	1	0.781	0.00237	1	0.949	1	4.69e-08
TR8163|c0_g1_i8	AT5G27450.3 | Symbols: MK | mevalonate kinase | chr5:9691051-9692975 FORWARD LENGTH=378	-1.03	-0.214	0.0274	-0.129	-0.714	-2.68	-0.206	-0.388	-0.0524	-2.04	0.541	1	1	1	0.42	0.0204	0.943	1	1	4.59e-05
TR8175|c3_g3_i4	AT5G53530.1 | Symbols: VPS26A | vacuolar protein sorting 26A | chr5:21746275-21748156 REVERSE LENGTH=302	-0.0562	-0.186	0.0255	-0.1	0.205	-2.71	-0.562	-1.11	-0.471	-0.561	0.993	1	1	1	0.8	0.00253	0.629	0.16	0.959	0.63
TR8181|c5_g1_i3	AT4G21470.1 | Symbols: ATFMN/FHY, FMN/FHY | riboflavin kinase/FMN hydrolase | chr4:11431284-11433197 FORWARD LENGTH=379	-0.919	-0.226	0.0237	0.219	-0.936	-0.766	-0.343	0.075	-0.378	-0.12	0.35	1	1	1	0.0229	0.582	0.783	1	0.958	0.953
TR8183|c3_g3_i1	AT5G48485.1 | Symbols: DIR1 | Bifunctional inhibitor/lipid-transfer protein/seed storage 2S albumin superfamily protein | chr5:19646317-19646625 REVERSE LENGTH=102	-0.547	0.496	0.207	-1.44	0.19	-2.22	-0.297	-0.179	0.101	-1.85	0.811	1	0.971	0.224	0.871	0.195	0.931	1	1	0.00589
TR8217|c1_g1_i5	AT5G13490.2 | Symbols: AAC2 | ADP/ATP carrier 2 | chr5:4336034-4337379 FORWARD LENGTH=385	-1.68	-0.169	-0.363	-0.0868	-1.06	-0.555	-0.247	0.237	-0.252	-0.293	0.0508	1	0.831	1	0.0108	0.756	0.889	1	1	0.835
TR8219|c6_g1_i1	No informative hit E<10-6	-1.46	1.6	-0.436	-2.04	-0.583	4.61	5.48	2.33	-1.28	-1.91	0.811	1	0.98	0.905	0.846	0.413	0.0198	0.868	1	0.671
TR8237|c1_g1_i1	AT3G44880.1 | Symbols: ACD1, LLS1, PAO | Pheophorbide a oxygenase family protein with Rieske [2Fe-2S] domain | chr3:16383858-16386204 FORWARD LENGTH=537	1.45	0.18	0.267	0.469	0.53	0.118	0.213	-0.198	0.212	-0.108	0.0259	1	0.844	0.682	0.142	0.96	0.865	1	1	0.947
TR8237|c1_g2_i1	AT3G44880.1 | Symbols: ACD1, LLS1, PAO | Pheophorbide a oxygenase family protein with Rieske [2Fe-2S] domain | chr3:16383858-16386204 FORWARD LENGTH=537	-2.44	-0.0215	-0.351	0.216	-2.28	-1.3	-0.147	0.0544	-0.397	-0.806	0.147	1	0.94	1	0.00987	0.598	0.975	1	1	0.607
TR8249|c0_g1_i3	AT5G62620.2 | Symbols: | Galactosyltransferase family protein | chr5:25137136-25139433 FORWARD LENGTH=596	-3.2	-0.312	-0.325	-0.531	-2.04	0.309	0.108	-0.000276	-0.183	0.384	0.00911	1	0.922	0.952	0.0117	0.919	0.977	1	1	0.833
TR8927|c1_g2_i5	AT3G13920.1 | Symbols: EIF4A1, RH4, TIF4A1 | eukaryotic translation initiation factor 4A1 | chr3:4592635-4594128 REVERSE LENGTH=412	-1.96	-0.183	-0.656	-0.2	-0.917	-0.18	-0.303	0.421	0.00789	-0.306	0.0109	1	0.431	1	0.0351	0.944	0.811	0.937	1	0.804
TR8927|c1_g2_i6	AT3G13920.1 | Symbols: EIF4A1, RH4, TIF4A1 | eukaryotic translation initiation factor 4A1 | chr3:4592635-4594128 REVERSE LENGTH=412	-1.48	-0.125	-0.424	0.0855	-1.01	-0.603	-0.394	0.117	-0.0854	-0.241	0.119	1	0.78	1	0.0268	0.734	0.757	1	1	0.885
TR8932|c0_g1_i3	AT5G50720.1 | Symbols: ATHVA22E, HVA22E | HVA22 homologue E | chr5:20633442-20634502 REVERSE LENGTH=116	3.61	0.429	0.907	-0.225	2.5	-0.37	0.921	-0.565	-0.541	-0.184	0.159	1	0.857	1	0.0456	0.961	0.782	1	1	0.979
TR8936|c1_g2_i1	AT5G58070.1 | Symbols: ATTIL, TIL | temperature-induced lipocalin | chr5:23500512-23501156 REVERSE LENGTH=186	0.768	0.397	-0.668	-0.224	1.26	1.7	0.35	0.35	0.191	0.804	0.662	1	0.716	1	0.0355	0.305	0.883	1	1	0.458
TR8936|c1_g2_i2	AT5G58070.1 | Symbols: ATTIL, TIL | temperature-induced lipocalin | chr5:23500512-23501156 REVERSE LENGTH=186	2.3	0.141	0.774	0.602	0.782	-0.67	0.569	-0.342	-0.239	-0.657	0.0179	1	0.487	0.856	0.152	0.746	0.616	1	1	0.488
TR8936|c1_g2_i8	AT5G58070.1 | Symbols: ATTIL, TIL | temperature-induced lipocalin | chr5:23500512-23501156 REVERSE LENGTH=186	2.38	0.365	0.678	0.622	0.72	0.984	0.824	0.257	0.203	-0.3	0.0232	1	0.641	0.894	0.232	0.596	0.332	1	1	0.875
TR8938|c1_g1_i5	AT4G38770.1 | Symbols: PRP4, ATPRP4 | proline-rich protein 4 | chr4:18097009-18098448 REVERSE LENGTH=448	0.857	-0.228	-0.0997	-0.0179	1.2	-0.327	0.389	-0.416	-0.491	0.192	0.576	1	0.989	1	0.0331	0.92	0.848	1	0.986	0.943
TR8946|c3_g1_i3	AT3G13050.1 | Symbols: | Major facilitator superfamily protein | chr3:4176866-4178868 FORWARD LENGTH=500	2.42	0.378	0.889	0.156	1	-0.889	0.0648	-0.518	-0.189	-0.247	0.026	1	0.465	1	0.0974	0.674	0.991	1	1	0.919
TR8946|c3_g1_i5	AT3G13050.1 | Symbols: | Major facilitator superfamily protein | chr3:4176866-4178868 FORWARD LENGTH=500	2.52	0.587	0.828	-0.00305	1.11	-0.216	0.274	-0.433	-0.0819	0.0245	0.0252	0.955	0.545	1	0.071	0.957	0.922	1	1	1
TR8946|c3_g1_i9	AT3G13050.1 | Symbols: | Major facilitator superfamily protein | chr3:4176866-4178868 FORWARD LENGTH=500	2.04	0.324	0.536	0.457	0.725	-0.7	0.136	-0.15	-0.0389	-0.646	0.0143	1	0.689	0.917	0.121	0.658	0.954	1	1	0.378
TR8948|c2_g1_i1	No informative hit E<10-6	-2.83	-0.401	-0.978	-0.536	-0.919	-1.41	-0.707	-0.178	-0.254	-0.271	0.0282	1	0.467	0.996	0.315	0.464	0.59	1	1	0.924
TR8974|c0_g3_i3	AT1G61870.1 | Symbols: PPR336 | pentatricopeptide repeat 336 | chr1:22865326-22866552 REVERSE LENGTH=408	-2.82	0.195	-0.864	1.18	-3.33	2.46	0.269	0.177	0.461	1.55	0.284	1	0.819	0.839	0.0175	0.404	0.963	1	1	0.389
TR8992|c0_g1_i12	AT2G40290.3 | Symbols: | Eukaryotic translation initiation factor 2 subunit 1 | chr2:16829872-16830889 REVERSE LENGTH=241	-1.24	0.0684	-0.164	0.514	-1.65	-0.181	-0.192	-0.266	0.205	0.0721	0.35	1	0.963	0.947	0.0147	0.954	0.93	1	1	0.982
TR8992|c0_g1_i5	AT2G40290.3 | Symbols: | Eukaryotic translation initiation factor 2 subunit 1 | chr2:16829872-16830889 REVERSE LENGTH=241	-2.22	0.272	-0.0754	-0.285	-2.13	-0.207	-0.353	0.281	-0.46	0.325	0.096	1	0.993	1	0.00484	0.949	0.823	1	0.977	0.853
TR9019|c4_g1_i2	AT5G11720.1 | Symbols: | Glycosyl hydrolases family 31 protein | chr5:3776840-3780025 FORWARD LENGTH=902	-2.66	-0.163	-1.02	-0.175	-1.3	-3.42	-0.202	-0.615	-0.934	-1.67	0.0942	1	0.586	1	0.106	0.0122	0.962	1	0.811	0.0285
TR9035|c0_g5_i2	AT3G04090.1 | Symbols: SIP1;1, SIP1A | small and basic intrinsic protein 1A | chr3:1072340-1074031 REVERSE LENGTH=240	1.46	-0.106	0.561	0.095	0.909	0.521	-0.14	0.0678	-0.223	0.816	0.0769	1	0.538	1	0.0294	0.754	0.949	1	1	0.131
TR9047|c2_g1_i1	AT3G25180.1 | Symbols: CYP82G1 | cytochrome P450, family 82, subfamily G, polypeptide 1 | chr3:9167443-9169270 REVERSE LENGTH=515	5.46	1.22	1.22	2.03	0.994	1.48	-2.16	-0.13	1.98	1.78	0.00436	0.836	0.663	0.467	0.404	0.732	0.0759	1	0.64	0.214
TR9060|c1_g1_i1	AT1G21280.1 | Symbols: | CONTAINS InterPro DOMAIN/s: Retrotransposon gag protein (InterPro:IPR005162); Has 707 Blast hits to 705 proteins in 25 species: Archae - 0; Bacteria - 0; Metazoa - 4; Fungi - 0; Plants - 703; Viruses - 0; Other Eukaryotes - 0 (source: NCBI BLink). | chr1:7447690-7448403 REVERSE LENGTH=237	17.8	6.7	6.78	-1.33	5.67	-0.0714	0	-3.74	3.67	0	0.0315	0.701	0.556	1	0.296	1	1	0.969	0.935	1
TR9060|c1_g1_i3	AT1G21280.1 | Symbols: | CONTAINS InterPro DOMAIN/s: Retrotransposon gag protein (InterPro:IPR005162); Has 707 Blast hits to 705 proteins in 25 species: Archae - 0; Bacteria - 0; Metazoa - 4; Fungi - 0; Plants - 703; Viruses - 0; Other Eukaryotes - 0 (source: NCBI BLink). | chr1:7447690-7448403 REVERSE LENGTH=237	17.4	6.21	7.09	-0.969	5.1	2.31	-0.194	-1.85	4.36	0	0.0426	0.783	0.56	1	0.36	1	0.997	1	0.886	1
TR9060|c3_g1_i1	AT5G26230.1 | Symbols: | unknown protein; FUNCTIONS IN: molecular_function unknown; INVOLVED IN: biological_process unknown; LOCATED IN: chloroplast; EXPRESSED IN: 22 plant structures; EXPRESSED DURING: 13 growth stages; Has 1807 Blast hits to 1807 proteins in 277 species: Archae - 0; Bacteria - 0; Metazoa - 736; Fungi - 347; Plants - 385; Viruses - 0; Other Eukaryotes - 339 (source: NCBI BLink).…	1.82	-0.0778	0.0662	0.194	1.64	1.06	0.391	0.109	0.166	0.393	0.234	1	0.997	1	0.0143	0.686	0.892	1	1	0.874
TR9062|c0_g3_i3	No informative hit E<10-6	-1.95	0.0508	-0.853	-0.791	-0.352	0.504	0.265	0.0212	1.19	-0.974	0.0413	1	0.228	0.759	0.52	0.793	0.869	1	0.0756	0.0302
TR9064|c3_g3_i12	No informative hit E<10-6	-4.36	-0.657	-0.61	-0.911	-2.18	-1.02	-0.783	-0.0334	0.353	-0.559	0.00961	1	0.88	0.929	0.0285	0.764	0.701	1	1	0.837
TR9064|c3_g3_i9	No informative hit E<10-6	-4.18	-1.49	-1.02	-0.128	-1.54	-1.58	-1.02	0.0437	-0.183	-0.421	0.0151	0.464	0.713	1	0.137	0.595	0.554	1	1	0.906
TR9071|c0_g1_i1	No informative hit E<10-6	1.85	0.513	0.379	-0.468	1.43	1.4	0.0726	0.121	0.327	0.884	0.183	1	0.913	1	0.021	0.482	0.991	1	1	0.414
TR9087|c1_g3_i1	AT3G52070.2 | Symbols: | unknown protein; FUNCTIONS IN: molecular_function unknown; INVOLVED IN: biological_process unknown; LOCATED IN: chloroplast; EXPRESSED IN: 22 plant structures; EXPRESSED DURING: 13 growth stages; Has 23 Blast hits to 23 proteins in 10 species: Archae - 0; Bacteria - 0; Metazoa - 0; Fungi - 0; Plants - 23; Viruses - 0; Other Eukaryotes - 0 (source: NCBI BLink). | chr3:1931…	2.63	-0.227	0.225	0.982	1.65	2.1	0.249	0.759	-0.456	1.55	0.113	1	0.973	0.776	0.0374	0.361	0.959	0.968	1	0.158
TR9095|c3_g1_i3	AT5G54400.1 | Symbols: | S-adenosyl-L-methionine-dependent methyltransferases superfamily protein | chr5:22090680-22091998 FORWARD LENGTH=292	0.251	-0.0789	-0.037	0.108	0.259	0.988	0.0606	-0.143	-0.256	1.33	0.913	1	0.999	1	0.795	0.592	0.991	1	1	0.0387
TR9115|c1_g1_i1	AT1G61690.1 | Symbols: | phosphoinositide binding | chr1:22782825-22786782 REVERSE LENGTH=1171	-1.99	-0.199	-0.381	0.273	-1.68	-0.208	0.111	0.136	0.169	-0.623	0.147	1	0.875	1	0.0415	0.953	0.974	1	1	0.647
TR9118|c0_g1_i2	AT1G22360.1 | Symbols: AtUGT85A2, UGT85A2 | UDP-glucosyl transferase 85A2 | chr1:7895068-7897527 REVERSE LENGTH=481	2.94	0.859	0.582	0.516	0.98	1.21	-0.231	0.609	0.136	0.701	0.00303	0.596	0.739	0.963	0.0891	0.524	0.939	0.931	1	0.603
TR9118|c0_g1_i3	AT3G11340.1 | Symbols: | UDP-Glycosyltransferase superfamily protein | chr3:3556728-3558149 FORWARD LENGTH=447	4.33	1.34	1.73	-0.679	1.94	1.42	-0.117	0.857	0.0525	0.627	0.0438	0.725	0.378	1	0.179	0.708	0.991	0.995	1	0.862
TR9120|c0_g2_i1	AT1G54050.1 | Symbols: | HSP20-like chaperones superfamily protein | chr1:20179558-20180122 REVERSE LENGTH=155	2.22	0.306	0.126	-1.05	2.84	3.66	1.2	0.289	-0.748	2.92	0.36	1	0.995	0.886	0.00112	0.0639	0.488	1	0.999	7.09e-05
TR9120|c0_g2_i2	AT1G54050.1 | Symbols: | HSP20-like chaperones superfamily protein | chr1:20179558-20180122 REVERSE LENGTH=155	4.17	0.826	0.621	-0.0497	2.77	3.36	1.15	0.0288	-0.00658	2.19	0.0336	1	0.92	1	0.000671	0.129	0.575	1	1	0.0148
TR9120|c0_g2_i3	AT1G54050.1 | Symbols: | HSP20-like chaperones superfamily protein | chr1:20179558-20180122 REVERSE LENGTH=155	8.13	2.08	0.443	2.64	2.97	2.67	2.51	-0.821	-1.33	2.3	0.00679	0.804	0.974	0.526	0.085	0.676	0.387	1	0.997	0.306
TR9120|c0_g2_i5	AT1G54050.1 | Symbols: | HSP20-like chaperones superfamily protein | chr1:20179558-20180122 REVERSE LENGTH=155	3.29	0.108	0.856	-0.397	2.72	3.69	1.07	-0.37	0.432	2.56	0.0234	1	0.714	1	1.58e-06	0.00398	0.399	1	1	2.27e-06
TR9123|c1_g4_i8	AT5G13200.1 | Symbols: | GRAM domain family protein | chr5:4207081-4208079 FORWARD LENGTH=272	3.22	0.907	0.843	0.244	1.22	0.267	0.797	-0.587	0.457	-0.399	0.0317	0.839	0.75	1	0.124	0.959	0.642	1	1	0.883
TR9124|c2_g1_i2	AT2G15820.1 | Symbols: OTP51 | endonucleases | chr2:6888734-6891360 REVERSE LENGTH=849	1.09	0.0945	0.198	0.0928	0.708	-0.284	0.125	-0.518	-0.113	0.223	0.1	1	0.902	1	0.0258	0.855	0.939	0.54	1	0.833
TR9162|c0_g5_i1	AT3G49210.1 | Symbols: | O-acyltransferase (WSD1-like) family protein | chr3:18238216-18241161 REVERSE LENGTH=518	0.697	-0.358	0.0321	0.136	0.886	0.648	0.0407	0.0378	0.272	0.297	0.571	1	1	1	0.0452	0.705	0.993	1	1	0.832
TR9168|c4_g1_i2	AT5G42820.1 | Symbols: ATU2AF35B, U2AF35B | Zinc finger C-x8-C-x5-C-x3-H type family protein | chr5:17170445-17171296 REVERSE LENGTH=283	1.39	0.418	0.0975	0.102	0.776	1.17	1.03	0.139	-0.221	0.213	0.097	0.859	0.979	1	0.0787	0.247	0.000722	1	1	0.88
TR9168|c4_g1_i4	AT1G27650.1 | Symbols: ATU2AF35A | U2 snRNP auxiliary factor small subunit, putative | chr1:9615152-9616042 FORWARD LENGTH=296	0.271	0.347	-0.189	-0.386	0.499	1.43	0.996	0.105	-0.0288	0.356	0.852	0.978	0.944	0.987	0.321	0.122	0.00369	1	1	0.743
TR9183|c2_g2_i3	No informative hit E<10-6	-3.4	-0.78	-0.631	-1.64	-0.353	-1.35	-0.0975	0.433	-0.814	-0.868	0.0464	0.989	0.866	0.325	0.786	0.674	0.991	1	0.958	0.669
TR9183|c2_g2_i5	No informative hit E<10-6	-3.73	-0.951	-0.689	-1.66	-0.43	-1.41	-0.146	0.448	-0.889	-0.819	0.0275	0.929	0.848	0.325	0.733	0.661	0.983	1	0.934	0.71
TR9190|c1_g1_i3	AT5G09850.1 | Symbols: | Transcription elongation factor (TFIIS) family protein | chr5:3063488-3065221 REVERSE LENGTH=353	-1.73	-0.254	-0.0313	-0.276	-1.17	-1.42	-0.62	0.0366	-0.345	-0.488	0.029	1	0.998	1	0.016	0.1	0.301	1	0.949	0.584
TR9192|c0_g1_i1	AT1G02110.1 | Symbols: | Protein of unknown function (DUF630 and DUF632) | chr1:392939-395434 FORWARD LENGTH=703	-2.39	0.0816	-0.797	-0.192	-1.48	-0.772	-0.477	0.444	-0.364	-0.374	0.0402	1	0.606	1	0.0159	0.739	0.78	1	1	0.852
TR9199|c1_g4_i11	AT2G26150.1 | Symbols: ATHSFA2, HSFA2 | heat shock transcription factor A2 | chr2:11135856-11137217 FORWARD LENGTH=345	-0.00736	-0.953	0.707	-0.616	0.854	2.61	2.57	0.274	-0.204	-0.028	1	0.944	0.831	1	0.569	0.275	0.00453	1	1	1
TR9204|c0_g1_i10	AT2G47760.3 | Symbols: ALG3, AtALG3 | asparagine-linked glycosylation 3 | chr2:19565933-19568221 REVERSE LENGTH=380	-0.842	0.139	0.0794	0.145	-1.21	0.652	-0.0272	-0.139	0.614	0.203	0.574	1	0.992	1	0.0499	0.768	0.997	1	0.811	0.934
TR9205|c0_g1_i16	AT4G26600.1 | Symbols: | S-adenosyl-L-methionine-dependent methyltransferases superfamily protein | chr4:13419629-13423418 FORWARD LENGTH=671	-2.76	-0.514	-0.74	0.287	-1.8	0.547	-0.103	0.844	0.348	-0.542	0.0143	0.985	0.62	1	0.00458	0.836	0.98	0.61	1	0.725
TR9205|c0_g1_i5	AT4G26600.1 | Symbols: | S-adenosyl-L-methionine-dependent methyltransferases superfamily protein | chr4:13419629-13423418 FORWARD LENGTH=671	-2.77	-0.78	-1.16	0.646	-1.47	0.773	-0.0284	0.791	0.637	-0.626	0.0237	0.776	0.246	0.917	0.0402	0.76	0.998	0.78	0.918	0.686
TR9205|c0_g1_i8	AT4G26600.1 | Symbols: | S-adenosyl-L-methionine-dependent methyltransferases superfamily protein | chr4:13419629-13423418 FORWARD LENGTH=671	-2.22	-0.373	-0.851	0.226	-1.22	0.83	-0.358	0.531	0.414	0.244	0.0333	1	0.387	1	0.0499	0.66	0.83	0.93	1	0.913
TR9210|c1_g1_i1	AT1G60420.1 | Symbols: | DC1 domain-containing protein | chr1:22261978-22264243 FORWARD LENGTH=578	3.06	1.06	0.71	0.403	0.888	2.04	0.836	0.0933	0.983	0.129	0.00303	0.363	0.649	1	0.161	0.125	0.387	1	0.431	0.969
TR9210|c1_g1_i2	AT1G60420.1 | Symbols: | DC1 domain-containing protein | chr1:22261978-22264243 FORWARD LENGTH=578	3.73	1.57	0.854	0.675	0.625	1.57	0.733	-0.0312	0.376	0.496	0.000347	0.0326	0.564	0.887	0.406	0.379	0.572	1	1	0.781
TR9210|c1_g1_i3	AT1G60420.1 | Symbols: | DC1 domain-containing protein | chr1:22261978-22264243 FORWARD LENGTH=578	0.824	1.38	0.405	-0.0453	-0.912	-1	0.866	0.63	-0.0456	-2.45	0.665	0.122	0.898	1	0.278	0.674	0.44	0.965	1	7.75e-06
TR9210|c1_g1_i4	AT1G60420.1 | Symbols: | DC1 domain-containing protein | chr1:22261978-22264243 FORWARD LENGTH=578	1.52	1.02	1	0.513	-1.01	-1.2	0.491	0.282	-0.0805	-1.89	0.323	0.553	0.473	1	0.182	0.591	0.815	1	1	0.00164
TR9213|c0_g1_i10	AT1G14270.2 | Symbols: | CAAX amino terminal protease family protein | chr1:4875099-4876503 REVERSE LENGTH=247	1.72	0.517	0.464	0.257	0.478	-0.0628	-0.17	-0.0993	0.227	-0.0204	0.00355	0.597	0.552	1	0.18	0.985	0.908	1	1	0.997
TR9215|c0_g1_i1	AT1G17870.1 | Symbols: ATEGY3, EGY3 | ethylene-dependent gravitropism-deficient and yellow-green-like 3 | chr1:6150036-6152185 REVERSE LENGTH=573	1.1	0.587	-0.575	0.368	0.717	0.934	1.53	-0.1	-0.432	-0.0601	0.469	0.961	0.775	1	0.292	0.672	0.0105	1	1	0.991
TR9216|c6_g1_i6	AT5G22730.1 | Symbols: | F-box/RNI-like/FBD-like domains-containing protein | chr5:7551632-7553219 REVERSE LENGTH=466	1.05	0.423	-0.203	1.06	-0.232	4.8	0.714	1.62	-0.204	2.68	0.605	1	0.974	0.579	0.847	5.96e-05	0.759	0.155	1	1.71e-05
TR9217|c1_g1_i1	AT1G21280.1 | Symbols: | CONTAINS InterPro DOMAIN/s: Retrotransposon gag protein (InterPro:IPR005162); Has 707 Blast hits to 705 proteins in 25 species: Archae - 0; Bacteria - 0; Metazoa - 4; Fungi - 0; Plants - 703; Viruses - 0; Other Eukaryotes - 0 (source: NCBI BLink). | chr1:7447690-7448403 REVERSE LENGTH=237	0.938	0.943	0.508	0.25	-0.764	2.69	-1.32	-0.148	0.773	3.39	0.798	1	0.946	1	0.62	0.402	0.579	1	1	0.000505
TR9220|c2_g2_i2	AT5G45560.1 | Symbols: | Pleckstrin homology (PH) domain-containing protein / lipid-binding START domain-containing protein | chr5:18465561-18470752 FORWARD LENGTH=719	0.329	-0.394	0.293	0.248	0.181	0.466	0.398	-2.2	1.27	1	0.919	1	0.959	1	0.898	0.92	0.917	0.02	0.499	0.53
TR9763|c1_g1_i1	AT1G79590.2 | Symbols: SYP52, ATSYP52 | syntaxin of plants 52 | chr1:29947064-29948304 FORWARD LENGTH=233	1.53	0.0984	0.211	0.319	0.906	0.564	0.267	-0.0748	0.148	0.224	0.0144	1	0.9	0.952	0.00411	0.636	0.795	1	1	0.842
TR9770|c3_g2_i2	AT1G34640.1 | Symbols: | peptidases | chr1:12687706-12688427 REVERSE LENGTH=110	5.09	1.94	1.13	1.58	0.433	0.252	-0.537	0.188	0.093	0.508	0.00156	0.231	0.665	0.395	0.735	0.971	0.875	1	1	0.865
TR9770|c3_g2_i4	AT1G34640.1 | Symbols: | peptidases | chr1:12687706-12688427 REVERSE LENGTH=110	3.13	0.654	1.37	0.713	0.395	0.012	0.0495	-0.538	-0.00789	0.509	0.0481	1	0.395	0.984	0.724	1	0.997	1	1	0.842
TR9770|c3_g2_i5	AT1G34640.1 | Symbols: | peptidases | chr1:12687706-12688427 REVERSE LENGTH=110	1.66	0.545	-0.208	-0.0467	1.37	2.69	2.13	-0.00572	-0.482	1.04	0.364	1	0.975	1	0.0698	0.115	0.00346	1	1	0.41
TR9773|c4_g1_i1	AT2G27420.1 | Symbols: | Cysteine proteinases superfamily protein | chr2:11726311-11727519 REVERSE LENGTH=348	-1.06	0.702	-0.0191	-0.17	-1.57	7.05	0.774	0.45	1.76	4.07	0.841	1	1	1	0.34	0.00618	0.918	1	0.702	0.00268
TR9773|c4_g1_i2	AT1G29090.1 | Symbols: | Cysteine proteinases superfamily protein | chr1:10163103-10164385 REVERSE LENGTH=355	-1.32	-0.467	-0.104	0.342	-1.09	4.56	-0.43	0.286	1.57	3.13	0.679	1	0.997	1	0.408	0.0531	0.95	1	0.608	0.00328
TR9773|c4_g1_i3	AT1G29090.1 | Symbols: | Cysteine proteinases superfamily protein | chr1:10163103-10164385 REVERSE LENGTH=355	-1.16	-0.0792	-0.107	0.281	-1.26	4.86	-0.351	0.395	1.44	3.38	0.728	1	0.996	1	0.327	0.0257	0.962	1	0.689	0.00104
TR9773|c4_g1_i5	AT1G29090.1 | Symbols: | Cysteine proteinases superfamily protein | chr1:10163103-10164385 REVERSE LENGTH=355	-2.33	0.0939	-0.569	0.674	-2.53	4.3	-0.653	0.202	1.55	3.19	0.403	1	0.93	1	0.0311	0.123	0.92	1	0.657	0.00482
TR9777|c0_g1_i1	AT4G34131.1 | Symbols: UGT73B3 | UDP-glucosyl transferase 73B3 | chr4:16343268-16344713 REVERSE LENGTH=481	1.93	0.813	0.343	-0.101	0.874	5.48	2.18	1.82	0.825	0.656	0.0926	0.639	0.902	1	0.136	5.37e-11	4e-06	0.00285	0.65	0.599
TR9777|c0_g1_i2	AT4G34131.1 | Symbols: UGT73B3 | UDP-glucosyl transferase 73B3 | chr4:16343268-16344713 REVERSE LENGTH=481	1.7	1.21	0.718	0.0268	-0.252	6.2	2.14	1.86	1.15	1.05	0.287	0.428	0.748	1	0.817	5.64e-09	0.00131	0.0395	0.525	0.396
TR9783|c6_g2_i1	No informative hit E<10-6	6.92	2.05	2.75	-0.815	2.93	-3.24	0.251	-0.0186	-3.01	-0.456	0.00331	0.609	0.202	1	0.0263	0.409	0.979	1	0.128	0.939
TR9783|c6_g2_i6	No informative hit E<10-6	5.57	1.47	2.13	-0.772	2.73	-1.44	0.88	-0.0713	-1.66	-0.59	0.0125	0.848	0.363	1	0.0198	0.783	0.841	1	0.654	0.895
TR9798|c0_g1_i1	AT3G23240.1 | Symbols: ERF1, ATERF1 | ethylene response factor 1 | chr3:8295705-8296361 FORWARD LENGTH=218	4.06	0.201	1.24	1.26	1.36	7.45	2.25	1.74	2.13	1.33	0.216	1	0.848	1	0.416	0.0206	0.533	0.991	0.488	0.758
TR9803|c3_g1_i2	AT3G06480.1 | Symbols: | DEAD box RNA helicase family protein | chr3:1985697-1989666 REVERSE LENGTH=1088	-1.57	-0.206	-0.775	0.205	-0.794	0.232	-0.116	0.401	-0.226	0.173	0.0353	1	0.197	1	0.0452	0.91	0.954	0.926	1	0.908
TR9823|c0_g1_i5	AT1G36390.2 | Symbols: | Co-chaperone GrpE family protein | chr1:13701811-13703524 REVERSE LENGTH=279	1.42	0.633	0.296	-0.0203	0.51	0.88	0.249	0.123	0.46	0.0476	0.0465	0.406	0.834	1	0.21	0.415	0.841	1	0.769	0.986
TR9829|c0_g2_i1	No informative hit E<10-6	1.5	0.26	0.251	-0.124	1.11	0.856	0.417	-0.158	0.106	0.491	0.0547	1	0.896	1	0.00205	0.489	0.658	1	1	0.511
TR9849|c2_g1_i10	AT1G23110.4 | Symbols: | unknown protein; FUNCTIONS IN: molecular_function unknown; LOCATED IN: chloroplast; BEST Arabidopsis thaliana protein match is: unknown protein (TAIR:AT1G70900.1). | chr1:8196608-8197665 REVERSE LENGTH=248	1.25	0.498	0.31	0.289	0.156	-0.984	0.495	-0.0333	-0.141	-1.3	0.481	1	0.952	1	0.894	0.666	0.812	1	1	0.0379
TR9849|c2_g1_i2	AT1G23110.4 | Symbols: | unknown protein; FUNCTIONS IN: molecular_function unknown; LOCATED IN: chloroplast; BEST Arabidopsis thaliana protein match is: unknown protein (TAIR:AT1G70900.1). | chr1:8196608-8197665 REVERSE LENGTH=248	0.364	0.241	-0.0178	0.149	-0.00826	-0.96	0.0606	0.31	-0.0143	-1.32	0.87	1	1	1	1	0.647	0.992	1	1	0.0239
TR9849|c2_g1_i5	AT1G23110.4 | Symbols: | unknown protein; FUNCTIONS IN: molecular_function unknown; LOCATED IN: chloroplast; BEST Arabidopsis thaliana protein match is: unknown protein (TAIR:AT1G70900.1). | chr1:8196608-8197665 REVERSE LENGTH=248	-0.0187	0.468	0.0998	-0.251	-0.336	-0.67	0.566	-0.134	0.618	-1.72	1	1	0.993	1	0.754	0.833	0.792	1	0.972	0.00946
TR9849|c2_g1_i8	AT1G23110.4 | Symbols: | unknown protein; FUNCTIONS IN: molecular_function unknown; LOCATED IN: chloroplast; BEST Arabidopsis thaliana protein match is: unknown protein (TAIR:AT1G70900.1). | chr1:8196608-8197665 REVERSE LENGTH=248	-0.537	0.669	-0.106	-0.646	-0.454	-2.12	0.0566	-0.442	-0.245	-1.49	0.81	0.961	0.991	0.95	0.612	0.166	0.993	1	1	0.0217
TR9863|c3_g2_i1	AT4G37990.1 | Symbols: ELI3-2, ELI3, ATCAD8, CAD-B2 | elicitor-activated gene 3-2 | chr4:17855964-17857388 FORWARD LENGTH=359	0.885	-0.382	0.817	0.604	-0.154	3.83	1.75	1.2	1.02	-0.14	0.701	1	0.747	1	0.91	0.00963	0.0429	0.689	0.788	0.977
TR9863|c3_g2_i2	AT4G37990.1 | Symbols: ELI3-2, ELI3, ATCAD8, CAD-B2 | elicitor-activated gene 3-2 | chr4:17855964-17857388 FORWARD LENGTH=359	1.91	0.826	1.23	0.207	-0.357	3.57	1.72	0.884	0.956	0.0177	0.104	0.63	0.155	1	0.624	0.000105	0.000532	0.638	0.501	1
TR9863|c3_g2_i3	AT4G37990.1 | Symbols: ELI3-2, ELI3, ATCAD8, CAD-B2 | elicitor-activated gene 3-2 | chr4:17855964-17857388 FORWARD LENGTH=359	1.09	-0.501	0.798	0.883	-0.0875	3.88	2	1.13	0.953	-0.205	0.618	1	0.763	0.907	0.957	0.0113	0.0126	0.799	0.853	0.96
TR9863|c3_g2_i4	AT4G37990.1 | Symbols: ELI3-2, ELI3, ATCAD8, CAD-B2 | elicitor-activated gene 3-2 | chr4:17855964-17857388 FORWARD LENGTH=359	1.6	0.779	1.13	0.108	-0.409	2.96	1.69	0.524	0.67	0.0741	0.178	0.662	0.201	1	0.546	0.00193	0.000385	0.99	0.835	0.983
TR9863|c3_g4_i2	AT4G39330.2 | Symbols: ATCAD9, CAD9 | cinnamyl alcohol dehydrogenase 9 | chr4:18291268-18292740 FORWARD LENGTH=311	0.753	0.293	0.804	-0.116	-0.228	3.25	1.72	1.02	0.633	-0.111	0.696	1	0.659	1	0.821	0.00732	0.00707	0.645	0.96	0.979
TR9867|c1_g2_i1	AT3G14690.1 | Symbols: CYP72A15 | cytochrome P450, family 72, subfamily A, polypeptide 15 | chr3:4937410-4939310 FORWARD LENGTH=512	-0.91	-0.0999	-0.709	0.26	-0.362	-4.11	-0.0787	-1.62	-0.00182	-2.4	0.725	1	0.833	1	0.774	0.00856	0.992	0.345	1	0.00282
TR9867|c1_g2_i3	AT3G14630.1 | Symbols: CYP72A9 | cytochrome P450, family 72, subfamily A, polypeptide 9 | chr3:4917498-4919409 FORWARD LENGTH=508	-0.144	-0.0637	-0.435	0.647	-0.292	-4.02	0.314	-2.06	-0.0255	-2.25	0.977	1	0.909	1	0.78	0.00103	0.924	0.0134	1	0.000264
TR9867|c1_g2_i4	AT3G14690.1 | Symbols: CYP72A15 | cytochrome P450, family 72, subfamily A, polypeptide 15 | chr3:4937410-4939310 FORWARD LENGTH=512	-0.92	-0.0203	-0.5	0.0793	-0.478	-3.63	0.098	-1.56	-0.0387	-2.13	0.684	1	0.893	1	0.636	0.0103	0.988	0.251	1	0.00264
TR9869|c0_g2_i4	AT5G55100.1 | Symbols: | SWAP (Suppressor-of-White-APricot)/surp domain-containing protein | chr5:22361281-22364664 REVERSE LENGTH=843	0.451	0.00801	0.0196	0.147	0.276	1.4	0.433	-0.1	0.11	0.955	0.695	1	1	1	0.599	0.114	0.626	1	1	0.019
TR9880|c0_g1_i1	AT2G15620.1 | Symbols: NIR1, NIR, ATHNIR | nitrite reductase 1 | chr2:6810552-6812666 FORWARD LENGTH=586	-0.785	-0.0153	-0.17	0.349	-0.95	0.111	-0.0525	0.407	-0.243	-0.000507	0.481	1	0.956	1	0.0268	0.975	0.99	0.989	1	1
TR9883|c2_g2_i12	AT3G07180.1 | Symbols: | GPI transamidase component PIG-S-related | chr3:2282455-2285475 REVERSE LENGTH=599	-1.72	0.126	0.157	-0.408	-1.59	-1.17	-0.378	-0.338	-0.336	-0.117	0.188	1	0.973	1	0.0308	0.491	0.836	1	1	0.973
TR9883|c2_g2_i3	AT3G07180.1 | Symbols: | GPI transamidase component PIG-S-related | chr3:2282455-2285475 REVERSE LENGTH=599	-2.31	-0.0564	-0.23	-0.518	-1.51	0.223	-0.11	-0.305	-0.155	0.792	0.0356	1	0.947	0.917	0.0226	0.945	0.975	1	1	0.392
TR9883|c2_g2_i9	AT3G07180.1 | Symbols: | GPI transamidase component PIG-S-related | chr3:2282455-2285475 REVERSE LENGTH=599	-3.36	-0.859	-1.29	-0.287	-0.924	-0.54	-0.341	0.114	-0.34	0.027	0.0337	0.88	0.38	1	0.466	0.895	0.92	1	1	1
TR9887|c0_g2_i2	AT2G17970.1 | Symbols: | 2-oxoglutarate (2OG) and Fe(II)-dependent oxygenase superfamily protein | chr2:7819116-7821276 REVERSE LENGTH=507	-3.34	-0.18	-0.706	0.885	-3.34	1.85	0.0956	0.153	1.14	0.465	0.185	1	0.883	0.999	0.0155	0.579	0.992	1	0.835	0.905
TR9894|c0_g1_i6	AT3G54470.1 | Symbols: | uridine 5'-monophosphate synthase / UMP synthase (PYRE-F) (UMPS) | chr3:20168285-20170245 REVERSE LENGTH=476	-4.53	-0.48	-0.985	-0.358	-2.71	-1.83	-1.13	-0.0995	0.389	-0.994	0.0416	1	0.789	1	0.0467	0.619	0.61	1	1	0.731
TR9901|c0_g4_i5	AT4G35320.1 | Symbols: | unknown protein; BEST Arabidopsis thaliana protein match is: unknown protein (TAIR:AT2G17300.1); Has 30201 Blast hits to 17322 proteins in 780 species: Archae - 12; Bacteria - 1396; Metazoa - 17338; Fungi - 3422; Plants - 5037; Viruses - 0; Other Eukaryotes - 2996 (source: NCBI BLink). | chr4:16806139-16806582 REVERSE LENGTH=147	-1.31	-0.0606	0.191	-0.936	-0.502	-2.8	-1.11	-0.395	-0.966	-0.336	0.434	1	0.975	0.647	0.578	0.0291	0.219	1	0.613	0.885
TR9904|c2_g1_i1	AT3G27170.1 | Symbols: CLC-B, ATCLC-B | chloride channel B | chr3:10024147-10026921 FORWARD LENGTH=780	0.351	-0.137	0.242	0.126	0.12	1.84	-0.0133	0.591	-0.0282	1.29	0.814	1	0.928	1	0.874	0.0538	1	0.842	1	0.00171
TR9904|c2_g1_i2	AT3G27170.1 | Symbols: CLC-B, ATCLC-B | chloride channel B | chr3:10024147-10026921 FORWARD LENGTH=780	-0.262	-0.492	0.0968	-0.00788	0.14	1.6	-0.363	0.743	-0.17	1.39	0.868	0.902	0.983	1	0.841	0.108	0.786	0.551	1	0.000213
TR9904|c2_g1_i3	AT3G27170.1 | Symbols: CLC-B, ATCLC-B | chloride channel B | chr3:10024147-10026921 FORWARD LENGTH=780	-0.144	-0.244	-0.0523	-0.0817	0.234	1.13	-0.354	0.229	-0.14	1.39	0.938	1	0.995	1	0.678	0.342	0.783	1	1	7.88e-05
TR9904|c2_g1_i4	AT3G27170.1 | Symbols: CLC-B, ATCLC-B | chloride channel B | chr3:10024147-10026921 FORWARD LENGTH=780	-0.0114	-0.313	0.251	0.269	-0.218	1.65	0.00238	0.339	-0.0998	1.41	1	1	0.927	1	0.744	0.117	1	1	1	0.000479
TR9904|c2_g1_i5	AT3G27170.1 | Symbols: CLC-B, ATCLC-B | chloride channel B | chr3:10024147-10026921 FORWARD LENGTH=780	-0.529	-0.512	0.0514	-0.156	0.0884	1.36	-0.0649	0.428	-0.199	1.2	0.651	0.83	0.995	1	0.903	0.179	0.984	0.968	1	0.00118
TR9904|c2_g1_i6	AT3G27170.1 | Symbols: CLC-B, ATCLC-B | chloride channel B | chr3:10024147-10026921 FORWARD LENGTH=780	0.0847	-0.225	0.0982	-0.146	0.357	1.39	-0.279	0.727	-0.13	1.07	0.976	1	0.984	1	0.515	0.231	0.875	0.611	1	0.0188
TR9904|c2_g1_i7	AT3G27170.1 | Symbols: CLC-B, ATCLC-B | chloride channel B | chr3:10024147-10026921 FORWARD LENGTH=780	-0.11	-0.338	-0.0238	-0.00907	0.261	1.4	-0.0299	0.211	-0.15	1.37	0.961	1	1	1	0.653	0.205	0.996	1	1	0.00034
TR9911|c1_g1_i1	AT1G55310.3 | Symbols: SR33, SCL33, At-SCL33 | SC35-like splicing factor 33 | chr1:20630676-20632695 FORWARD LENGTH=300	1.83	0.628	0.358	-0.00862	0.857	1.51	0.632	-0.0324	0.442	0.467	0.0282	0.682	0.837	1	0.0429	0.132	0.369	1	0.927	0.603
TR9911|c1_g1_i4	AT1G55310.3 | Symbols: SR33, SCL33, At-SCL33 | SC35-like splicing factor 33 | chr1:20630676-20632695 FORWARD LENGTH=300	2.52	0.552	0.539	0.543	0.881	1.63	0.772	-0.126	0.557	0.426	0.00203	0.866	0.689	0.84	0.0541	0.125	0.242	1	0.81	0.704
TR9911|c1_g1_i6	AT3G13570.1 | Symbols: SCL30A, At-SCL30A | SC35-like splicing factor 30A | chr3:4429564-4431602 REVERSE LENGTH=262	2.3	0.74	0.399	0.693	0.469	2.5	0.712	0.678	0.717	0.399	0.0223	0.643	0.865	0.774	0.459	0.00666	0.369	0.843	0.679	0.764
TR9913|c2_g2_i2	AT3G05640.2 | Symbols: | Protein phosphatase 2C family protein | chr3:1640610-1642227 REVERSE LENGTH=358	2.04	-0.406	0.545	-0.147	2.05	0.391	0.112	-0.102	0.15	0.232	0.264	1	0.833	1	0.0403	0.932	0.985	1	1	0.965
TR9921|c0_g4_i1	AT2G03150.1 | Symbols: emb1579 | ATP/GTP-binding protein family | chr2:952313-959004 FORWARD LENGTH=1340	-3.02	-0.676	-1.09	-0.258	-0.995	-0.926	-0.42	0.232	-0.508	-0.229	0.0256	0.905	0.388	1	0.332	0.702	0.83	1	0.992	0.947
TR9925|c0_g1_i3	AT1G08570.2 | Symbols: ACHT4 | atypical CYS HIS rich thioredoxin 4 | chr1:2713059-2714312 FORWARD LENGTH=244	1.84	-0.248	0.553	0.619	0.915	1.97	0.416	0.448	-0.0619	1.17	0.033	1	0.645	0.678	0.0361	0.0222	0.733	0.959	1	0.00508
TR9925|c0_g1_i5	AT1G08570.2 | Symbols: ACHT4 | atypical CYS HIS rich thioredoxin 4 | chr1:2713059-2714312 FORWARD LENGTH=244	2.43	-0.376	0.241	1.76	0.81	2.6	0.56	0.348	0.259	1.44	0.026	1	0.949	0.00651	0.184	0.015	0.702	1	1	0.00929
TR9925|c0_g1_i6	AT1G08570.4 | Symbols: ACHT4 | atypical CYS HIS rich thioredoxin 4 | chr1:2713604-2714312 FORWARD LENGTH=177	2.7	-0.237	0.512	1.3	1.12	3.64	0.563	1.17	-0.129	2.04	0.0447	1	0.857	0.314	0.107	0.00185	0.788	0.449	1	0.000925
TR9925|c0_g1_i7	AT1G08570.4 | Symbols: ACHT4 | atypical CYS HIS rich thioredoxin 4 | chr1:2713604-2714312 FORWARD LENGTH=177	1.95	-0.0807	0.54	0.564	0.925	5.62	1.32	0.881	0.547	2.87	0.141	1	0.815	0.977	0.158	4.23e-10	0.0733	0.702	0.972	2.19e-08
TR9938|c0_g1_i5	AT2G36000.1 | Symbols: | Mitochondrial transcription termination factor family protein | chr2:15117181-15118182 FORWARD LENGTH=333	0.699	0.315	0.376	0.144	-0.136	1.53	0.574	0.371	0.222	0.364	0.378	0.969	0.703	1	0.779	0.0136	0.204	0.908	1	0.588
TR9944|c3_g3_i1	AT2G12190.1 | Symbols: | Cytochrome P450 superfamily protein | chr2:4891807-4893345 REVERSE LENGTH=512	-4.94	-1.01	-0.684	-0.568	-2.68	-1.45	-0.351	-0.104	-0.271	-0.725	0.00201	0.881	0.855	1	0.00328	0.644	0.936	1	1	0.76
TR9945|c0_g2_i2	AT1G78570.1 | Symbols: RHM1, ROL1, ATRHM1 | rhamnose biosynthesis 1 | chr1:29550110-29552207 FORWARD LENGTH=669	-2.72	-0.576	-0.613	-0.369	-1.17	-1.58	-0.417	-0.282	-0.605	-0.274	0.0159	0.948	0.728	1	0.0931	0.315	0.82	1	0.92	0.907
TR9945|c0_g2_i6	AT3G14790.1 | Symbols: RHM3, ATRHM3 | rhamnose biosynthesis 3 | chr3:4964791-4966875 FORWARD LENGTH=664	-3.37	-0.482	-0.691	-0.235	-1.97	-1.47	-0.364	-0.0457	-0.288	-0.77	0.012	1	0.752	1	0.0233	0.464	0.876	1	1	0.609
TR9953|c1_g4_i1	AT5G55350.1 | Symbols: | MBOAT (membrane bound O-acyl transferase) family protein | chr5:22442356-22443393 REVERSE LENGTH=345	-0.029	0.135	0.0781	0.167	-0.41	-2.55	-0.121	-0.795	-0.19	-1.44	1	1	0.996	1	0.721	0.0385	0.97	0.871	1	0.0123
TR9953|c1_g4_i4	AT5G55350.1 | Symbols: | MBOAT (membrane bound O-acyl transferase) family protein | chr5:22442356-22443393 REVERSE LENGTH=345	0.2	-0.0258	0.0784	0.408	-0.261	-2.64	0.0744	-1.32	-0.461	-0.937	0.952	1	0.996	1	0.835	0.0479	0.988	0.405	1	0.332
TR9954|c1_g2_i2	AT1G03840.1 | Symbols: MGP | C2H2 and C2HC zinc fingers superfamily protein | chr1:967596-970058 REVERSE LENGTH=506	-2.56	-0.173	-0.768	-0.404	-1.22	-1.16	-0.175	0.259	-0.324	-0.923	0.0303	1	0.637	1	0.0557	0.561	0.962	1	1	0.349
TR9954|c1_g2_i5	No informative hit E<10-6	-6.53	-1.89	-1.71	-0.949	-1.98	0.39	0.302	0.904	0.198	-1.01	0.0345	0.786	0.716	1	0.365	0.972	0.973	1	1	0.823
TR9954|c1_g2_i7	AT4G02670.1 | Symbols: AtIDD12, IDD12 | indeterminate(ID)-domain 12 | chr4:1176190-1178489 REVERSE LENGTH=402	-2.8	-0.552	-0.812	0.172	-1.61	-0.535	0.192	-0.0561	0.0401	-0.711	0.00772	0.942	0.517	1	0.00637	0.828	0.945	1	1	0.5
TR9954|c1_g4_i1	AT3G50700.1 | Symbols: AtIDD2, IDD2 | indeterminate(ID)-domain 2 | chr3:18840945-18842829 FORWARD LENGTH=452	1.57	0.305	0.418	-0.322	1.17	0.649	0.303	-0.129	0.0382	0.437	0.207	1	0.864	1	0.0361	0.784	0.901	1	1	0.788
TR9956|c0_g1_i5	AT5G14520.1 | Symbols: | pescadillo-related | chr5:4680789-4684330 REVERSE LENGTH=590	-2.03	-0.335	-0.62	-0.0885	-0.981	-0.18	-0.578	0.391	0.12	-0.113	0.0108	1	0.513	1	0.0256	0.947	0.433	0.987	1	0.96
TR9966|c0_g1_i2	AT5G21150.1 | Symbols: AGO9 | Argonaute family protein | chr5:7193472-7198113 FORWARD LENGTH=896	-1.19	-0.139	-0.264	0.09	-0.878	-0.613	-0.107	0.0586	-0.171	-0.394	0.152	1	0.877	1	0.0329	0.648	0.962	1	1	0.647
TR9966|c1_g4_i1	AT2G27040.2 | Symbols: AGO4 | Argonaute family protein | chr2:11536795-11541503 REVERSE LENGTH=924	-2.12	-0.346	-0.565	-0.204	-1	-0.832	-0.0361	0.0109	-0.193	-0.613	0.0376	1	0.724	1	0.064	0.66	0.996	1	1	0.557
TR9968|c2_g3_i2	AT2G20340.1 | Symbols: | Pyridoxal phosphate (PLP)-dependent transferases superfamily protein | chr2:8779804-8782490 FORWARD LENGTH=490	-6.84	-2.1	-1.08	-0.274	-3.38	-0.226	-0.554	-0.635	0.825	0.138	0.00295	0.315	0.788	1	0.0437	0.985	0.906	1	1	0.99
TR9975|c1_g1_i2	AT1G72680.1 | Symbols: ATCAD1, CAD1 | cinnamyl-alcohol dehydrogenase | chr1:27359346-27360876 REVERSE LENGTH=355	2.52	0.135	-0.24	0.48	2.15	-0.54	-0.0783	-1.03	1.04	-0.477	0.192	1	0.972	1	0.0296	0.91	0.993	0.823	0.773	0.891
TR9979|c1_g2_i1	AT1G10150.1 | Symbols: | Carbohydrate-binding protein | chr1:3326160-3327404 FORWARD LENGTH=414	1.44	1.49	-0.93	-2.68	3.56	-3.1	-0.23	-0.525	-1.09	-1.26	0.775	0.98	0.911	0.458	0.0457	0.564	0.986	1	1	0.813
TR9980|c2_g1_i1	AT1G72160.1 | Symbols: | Sec14p-like phosphatidylinositol transfer family protein | chr1:27153823-27155609 REVERSE LENGTH=490	-5.04	-1.23	-1.27	-1.37	-1.17	1.47	-0.142	0.625	0.211	0.78	0.0247	0.945	0.711	0.726	0.465	0.739	0.988	1	1	0.844
TR9988|c0_g2_i1	AT1G73460.1 | Symbols: | Protein kinase superfamily protein | chr1:27620122-27624899 FORWARD LENGTH=1169	-4.92	-0.559	-1.73	-0.785	-1.85	-2.77	-0.866	-0.682	-0.358	-0.864	0.0253	1	0.365	1	0.343	0.178	0.591	1	1	0.738
TR9989|c0_g2_i1	AT4G16970.1 | Symbols: | Protein kinase superfamily protein | chr4:9551516-9555766 REVERSE LENGTH=889	-1.88	-0.382	-0.311	-0.132	-1.05	-1.14	-0.422	-0.235	-0.0167	-0.464	0.026	0.961	0.836	1	0.0606	0.27	0.594	1	1	0.618
TR9993|c0_g1_i2	AT1G31660.1 | Symbols: | CONTAINS InterPro DOMAIN/s: Bystin (InterPro:IPR007955); Has 475 Blast hits to 467 proteins in 210 species: Archae - 0; Bacteria - 9; Metazoa - 155; Fungi - 139; Plants - 55; Viruses - 0; Other Eukaryotes - 117 (source: NCBI BLink). | chr1:11331176-11333440 REVERSE LENGTH=444	-1.96	-0.252	-0.731	-0.232	-0.74	0.242	-0.824	0.79	0.2	0.0766	0.0104	1	0.307	1	0.106	0.914	0.0756	0.264	1	0.976
TR9995|c0_g2_i6	AT5G13110.1 | Symbols: G6PD2 | glucose-6-phosphate dehydrogenase 2 | chr5:4158952-4161640 FORWARD LENGTH=596	-1.7	-0.115	-0.466	-0.177	-0.94	0.003	-0.571	0.26	-0.142	0.456	0.0674	1	0.753	1	0.0422	1	0.544	1	1	0.682
TR9996|c0_g1_i2	AT4G35650.1 | Symbols: IDH-III | isocitrate dehydrogenase III | chr4:16908584-16909973 FORWARD LENGTH=368	-2.46	-0.299	-0.538	-0.331	-1.29	-0.494	-0.386	0.267	-0.338	-0.037	0.00718	1	0.726	1	0.00906	0.828	0.805	1	1	0.995
TR9998|c4_g2_i2	AT3G09470.2 | Symbols: | Major facilitator superfamily protein | chr3:2911668-2914410 REVERSE LENGTH=437	1.4	0.229	0.431	-0.322	1.06	-0.968	-0.0587	-0.45	-0.182	-0.278	0.115	1	0.752	1	0.00906	0.433	0.987	0.926	1	0.829
TR9998|c4_g2_i5	AT3G09470.2 | Symbols: | Major facilitator superfamily protein | chr3:2911668-2914410 REVERSE LENGTH=437	1.06	-0.0797	0.146	-0.413	1.4	-0.717	0.185	-0.493	-0.186	-0.223	0.306	1	0.965	0.952	0.000414	0.643	0.936	0.902	1	0.885
TR10002|c1_g2_i5	AT3G11480.1 | Symbols: BSMT1, ATBSMT1 | S-adenosyl-L-methionine-dependent methyltransferases superfamily protein | chr3:3614544-3617137 FORWARD LENGTH=379	5.63	1.39	3.51	0.00824	0.72	4.25	-0.788	0.0466	2.92	2.08	0.0293	0.923	0.0544	1	0.655	0.127	0.844	1	0.218	0.182
TR10014|c3_g1_i2	AT1G24490.2 | Symbols: ALB4, ARTEMIS | OxaA/YidC-like membrane insertion protein | chr1:8682364-8684966 FORWARD LENGTH=462	1.09	-1.87	-0.0335	1.59	1.41	9.28	0.181	3.54	4.51	1.04	0.907	1	1	1	0.673	0.0488	0.994	0.669	0.361	0.902
TR10016|c0_g1_i1	AT1G75820.1 | Symbols: CLV1, FAS3, FLO5, ATCLV1 | Leucine-rich receptor-like protein kinase family protein | chr1:28463631-28466652 REVERSE LENGTH=980	-2.82	-0.496	0.141	-0.287	-2.17	-0.519	0.172	-0.0463	-0.583	-0.0624	0.136	1	0.99	1	0.0255	0.915	0.976	1	1	0.996
TR10016|c0_g1_i4	AT1G75820.1 | Symbols: CLV1, FAS3, FLO5, ATCLV1 | Leucine-rich receptor-like protein kinase family protein | chr1:28463631-28466652 REVERSE LENGTH=980	-2.45	0.0911	-0.772	-0.129	-1.64	-1.31	-0.312	0.179	-0.392	-0.784	0.0132	1	0.528	1	0.00173	0.373	0.869	1	1	0.363
TR10016|c0_g1_i5	AT1G75820.1 | Symbols: CLV1, FAS3, FLO5, ATCLV1 | Leucine-rich receptor-like protein kinase family protein | chr1:28463631-28466652 REVERSE LENGTH=980	-3.11	-0.253	-1.18	-0.238	-1.43	-1.95	-0.523	0.145	-0.726	-0.851	6.71e-05	1	0.0638	1	0.00256	0.0248	0.57	1	0.451	0.154
TR10037|c5_g1_i1	No informative hit E<10-6	-11.2	-0.517	-0.776	-5.1	-4.84	-1.38	-0.0627	1.55	-0.073	-2.8	0.0346	1	0.97	0.434	0.117	0.946	1	1	1	0.719
TR10037|c5_g1_i3	No informative hit E<10-6	-12.8	-0.964	-0.699	-5.58	-5.53	-2.36	1.13	-1.31	-2.19	0.00549	0.0182	1	0.975	0.387	0.0882	0.861	0.936	1	1	1
TR10037|c5_g1_i4	No informative hit E<10-6	-10.2	0.458	-0.827	-4.82	-5.02	-9.56	-1.68	-1.96	-2.66	-3.26	0.0449	1	0.963	0.427	0.0858	0.144	0.857	1	0.945	0.607
TR10043|c1_g1_i1	AT4G24280.1 | Symbols: cpHsc70-1 | chloroplast heat shock protein 70-1 | chr4:12590094-12593437 FORWARD LENGTH=718	4.54	0.998	1.16	-0.545	2.93	2.28	1.86	-0.486	0.123	0.775	0.000392	0.773	0.489	1	1.33e-05	0.249	0.0181	1	1	0.649
TR10043|c1_g1_i6	AT4G24280.1 | Symbols: cpHsc70-1 | chloroplast heat shock protein 70-1 | chr4:12590094-12593437 FORWARD LENGTH=718	4.9	0.887	1.04	-0.00559	2.97	2.63	1.67	-0.379	0.525	0.811	3.11e-05	0.833	0.534	1	1.58e-06	0.106	0.032	1	1	0.583
TR10046|c0_g1_i4	No informative hit E<10-6	3.98	0.454	-0.561	-0.475	4.56	1.52	1.19	0.879	-1.22	0.671	0.421	1	0.974	1	0.046	0.882	0.879	1	1	0.942
TR10049|c1_g1_i1	AT2G25790.1 | Symbols: | Leucine-rich receptor-like protein kinase family protein | chr2:11000631-11004031 FORWARD LENGTH=960	-1.79	-0.107	-0.628	-0.0825	-0.968	-0.584	0.00736	-0.00751	-0.0184	-0.565	0.0383	1	0.573	1	0.0332	0.724	1	1	1	0.456
TR10051|c3_g1_i4	AT1G08450.1 | Symbols: CRT3, PSL1, EBS2, AtCRT3 | calreticulin 3 | chr1:2668008-2671800 REVERSE LENGTH=424	3.22	0.36	0.754	1.68	0.431	3.58	0.757	0.514	1.46	0.849	0.0487	1	0.833	0.139	0.697	0.0371	0.821	1	0.148	0.682
TR10517|c5_g1_i2	No informative hit E<10-6	1.88	0.611	-0.235	-0.244	1.75	1.45	1.14	-0.337	-0.958	1.61	0.449	1	0.982	1	0.0373	0.737	0.582	1	0.977	0.141
TR10531|c1_g1_i3	AT2G17230.1 | Symbols: EXL5 | EXORDIUM like 5 | chr2:7494892-7495983 REVERSE LENGTH=363	-1.73	0.2	0.151	-0.816	-1.26	-1.37	-1.23	0.322	-0.463	0.00378	0.123	1	0.974	0.563	0.0152	0.378	0.0336	1	0.986	1
TR10531|c1_g1_i4	AT2G17230.1 | Symbols: EXL5 | EXORDIUM like 5 | chr2:7494892-7495983 REVERSE LENGTH=363	-3.17	-0.331	0.0931	-0.257	-2.67	0.117	-0.238	0.752	-0.661	0.265	0.0984	1	0.996	1	0.00485	0.995	0.966	1	1	0.954
TR10545|c1_g1_i3	No informative hit E<10-6	-1.45	-0.76	0.0229	0.0119	-0.722	-34.4	-11.3	-12.3	-11.1	0.27	0.918	1	1	1	0.905	1.56e-06	0.0535	0.104	0.165	0.995
TR10562|c0_g1_i3	No informative hit E<10-6	1.26	-0.28	0.121	-0.392	1.81	1.11	0.767	-0.538	-0.0117	0.892	0.582	1	0.993	1	0.0241	0.708	0.72	1	1	0.588
TR10562|c0_g1_i5	No informative hit E<10-6	1.49	0.236	-0.0532	-0.25	1.55	1.13	0.892	-0.247	-0.0252	0.509	0.393	1	0.999	1	0.023	0.621	0.504	1	1	0.787
TR10565|c0_g1_i2	AT3G60240.2 | Symbols: EIF4G, CUM2 | eukaryotic translation initiation factor 4G | chr3:22261842-22268295 FORWARD LENGTH=1723	0.338	0.123	-0.0606	-0.236	0.511	1.54	1.6	-0.0567	-0.397	0.385	0.897	1	0.998	1	0.586	0.394	0.00955	1	1	0.845
TR10581|c3_g1_i6	AT1G70350.1 | Symbols: | unknown protein; Has 98 Blast hits to 98 proteins in 11 species: Archae - 0; Bacteria - 0; Metazoa - 0; Fungi - 0; Plants - 98; Viruses - 0; Other Eukaryotes - 0 (source: NCBI BLink). | chr1:26507341-26508262 REVERSE LENGTH=105	1.84	0.131	0.0683	0.505	1.14	0.62	-0.264	0.555	0.0197	0.31	0.122	1	0.994	0.971	0.0452	0.804	0.922	0.97	1	0.881
TR10608|c0_g2_i4	No informative hit E<10-6	0.869	0.63	0.375	-1.89	1.76	12.8	5.55	-0.0385	5.44	1.86	0.946	1	0.993	1	0.632	0.0257	0.286	1	0.468	0.84
TR10616|c0_g1_i1	AT5G10170.1 | Symbols: ATMIPS3, MIPS3 | myo-inositol-1-phosphate synthase 3 | chr5:3187538-3190161 REVERSE LENGTH=510	-1.42	0.311	-0.413	-0.313	-1.01	-2.88	0.102	-0.728	-1.01	-1.24	0.329	1	0.891	1	0.114	0.0124	0.982	0.882	0.488	0.0844
TR10616|c0_g1_i6	AT5G10170.1 | Symbols: ATMIPS3, MIPS3 | myo-inositol-1-phosphate synthase 3 | chr5:3187538-3190161 REVERSE LENGTH=510	-0.994	0.344	-0.699	-0.156	-0.483	-2.71	0.15	-0.939	-0.953	-0.969	0.558	1	0.726	1	0.553	0.0334	0.97	0.662	0.601	0.335
TR10620|c0_g1_i1	AT5G03490.1 | Symbols: | UDP-Glycosyltransferase superfamily protein | chr5:871550-872947 FORWARD LENGTH=465	2.62	1.08	0.155	0.641	0.744	5.17	1.35	1.29	1.53	1	0.149	0.792	0.988	1	0.486	0.00031	0.319	0.619	0.405	0.594
TR10620|c0_g1_i2	AT5G03490.1 | Symbols: | UDP-Glycosyltransferase superfamily protein | chr5:871550-872947 FORWARD LENGTH=465	3.69	1.05	0.776	0.0582	1.81	4.52	1.51	0.865	1.25	0.896	0.0123	0.703	0.768	1	0.0162	0.00105	0.129	0.91	0.532	0.67
TR10620|c0_g1_i3	AT3G16520.2 | Symbols: UGT88A1 | UDP-glucosyl transferase 88A1 | chr3:5618847-5620833 REVERSE LENGTH=446	3.75	1.35	0.715	-0.554	2.24	7.52	1.9	1.62	2.48	1.52	0.121	0.833	0.901	1	0.0498	0.000124	0.295	0.695	0.262	0.555
TR10620|c0_g1_i4	AT5G03490.1 | Symbols: | UDP-Glycosyltransferase superfamily protein | chr5:871550-872947 FORWARD LENGTH=465	4.2	1.22	0.504	0.569	1.9	4.47	1.44	1.2	0.874	0.95	0.000735	0.427	0.878	1	0.00612	0.000183	0.101	0.487	0.815	0.532
TR10621|c1_g1_i1	AT3G45770.1 | Symbols: | Polyketide synthase, enoylreductase family protein | chr3:16805753-16807774 REVERSE LENGTH=375	0.371	-0.215	-0.0171	0.205	0.398	1.71	0.0339	0.244	-0.0332	1.47	0.815	1	1	1	0.526	0.252	0.997	1	1	0.0419
TR10622|c0_g1_i10	AT4G23420.2 | Symbols: | NAD(P)-binding Rossmann-fold superfamily protein | chr4:12226288-12228562 FORWARD LENGTH=316	3.71	0.284	1.19	0.718	1.53	0.73	0.675	-0.223	0.0435	0.236	0.00493	1	0.413	0.952	0.0485	0.82	0.737	1	1	0.945
TR10626|c0_g3_i3	AT4G10250.1 | Symbols: ATHSP22.0 | HSP20-like chaperones superfamily protein | chr4:6370537-6371124 FORWARD LENGTH=195	4.15	1.49	0.555	-0.749	2.86	3.04	1.45	-0.258	0.196	1.66	0.0817	0.445	0.933	1	0.00954	0.353	0.261	1	1	0.197
TR10626|c0_g3_i4	AT4G10250.1 | Symbols: ATHSP22.0 | HSP20-like chaperones superfamily protein | chr4:6370537-6371124 FORWARD LENGTH=195	3.62	0.687	0.551	-1.34	3.72	1.35	1.52	-0.694	-0.903	1.43	0.254	1	0.953	0.981	0.00485	0.807	0.392	1	1	0.494
TR10626|c0_g3_i5	AT4G10250.1 | Symbols: ATHSP22.0 | HSP20-like chaperones superfamily protein | chr4:6370537-6371124 FORWARD LENGTH=195	4.35	2	-0.184	-0.446	2.98	3.69	2.4	-0.247	1.13	0.406	0.173	0.495	0.993	1	0.0403	0.406	0.185	1	1	0.949
TR10629|c0_g1_i13	AT1G07080.1 | Symbols: | Thioredoxin superfamily protein | chr1:2170069-2171861 FORWARD LENGTH=265	4.14	0.232	0.747	0.698	2.47	1.94	0.848	0.185	1.14	-0.233	0.0401	1	0.86	1	0.0146	0.54	0.722	1	0.843	0.969
TR10671|c0_g5_i6	AT5G39940.1 | Symbols: | FAD/NAD(P)-binding oxidoreductase family protein | chr5:15987649-15990561 FORWARD LENGTH=480	1.67	0.608	0.477	0.334	0.253	0.556	0.17	0.151	0.0105	0.224	0.0408	0.691	0.687	1	0.673	0.731	0.936	1	1	0.884
TR10686|c0_g2_i1	No informative hit E<10-6	9.36	2.1	0.00654	3.06	4.2	-14.9	-8.62	-10.3	2	2.04	0.207	1	1	0.988	0.32	0.0429	0.131	0.163	1	0.857
TR10692|c1_g1_i7	AT5G45190.1 | Symbols: | Cyclin family protein | chr5:18277808-18280733 REVERSE LENGTH=579	-0.877	-0.156	-0.0241	0.442	-1.14	-0.593	-0.349	0.21	-0.241	-0.212	0.521	1	1	0.983	0.0498	0.772	0.822	1	1	0.92
TR10696|c2_g2_i2	No informative hit E<10-6	8.98	3.66	2.75	1.47	1.09	11.4	8.71	3.92	-0.557	-0.695	0.102	0.807	0.806	1	0.76	0.00456	0.000718	0.431	1	0.933
TR10696|c2_g2_i6	No informative hit E<10-6	-8.63	0.0322	-2.05	-2.6	-4.02	10.9	6.15	7.61	-2.48	-0.403	0.149	1	0.864	0.865	0.297	0.00618	0.00196	0.00585	0.782	0.963
TR10696|c2_g2_i7	No informative hit E<10-6	5.14	1.77	0	-0.911	4.28	12.2	8.49	5.02	-0.682	-0.66	1	1	1	1	0.217	0.000907	0.00019	0.0774	1	0.924
TR10700|c1_g1_i1	AT2G45380.1 | Symbols: | FUNCTIONS IN: molecular_function unknown; INVOLVED IN: biological_process unknown; LOCATED IN: cellular_component unknown; EXPRESSED IN: inflorescence meristem, flower, cultured cell; EXPRESSED DURING: petal differentiation and expansion stage; BEST Arabidopsis thaliana protein match is: Calcium-binding EF-hand family protein (TAIR:AT4G34070.1); Has 171 Blast hits to 170 …	-0.326	0.927	-0.0777	-1.6	0.429	0.852	1.77	-0.487	-0.704	0.272	0.909	0.704	0.996	0.204	0.676	0.783	0.00825	1	0.949	0.928
TR10709|c1_g1_i5	AT1G03350.1 | Symbols: | BSD domain-containing protein | chr1:822834-824246 REVERSE LENGTH=470	-0.41	-0.133	-0.0797	0.144	-0.341	-2.19	-0.678	-0.342	-0.212	-0.954	0.784	1	0.989	1	0.578	0.0155	0.4	1	1	0.108
TR10791|c4_g1_i2	AT1G34300.1 | Symbols: | lectin protein kinase family protein | chr1:12503450-12505939 FORWARD LENGTH=829	-4.15	-1.45	-0.0539	0.0598	-2.71	-0.0272	0.179	0.111	0.627	-0.945	0.094	0.833	1	1	0.0478	1	0.984	1	1	0.763
TR10799|c1_g2_i2	AT4G39420.1 | Symbols: | unknown protein; Has 46 Blast hits to 40 proteins in 10 species: Archae - 0; Bacteria - 0; Metazoa - 0; Fungi - 0; Plants - 44; Viruses - 0; Other Eukaryotes - 2 (source: NCBI BLink). | chr4:18339731-18354701 FORWARD LENGTH=2513	-1.88	-0.322	-0.513	-0.0392	-1	-0.384	-0.269	-0.161	0.0949	-0.0477	0.0373	1	0.676	1	0.0638	0.857	0.863	1	1	0.991
TR10813|c2_g1_i2	AT2G34660.2 | Symbols: MRP2, ABCC2, AtABCC2 | multidrug resistance-associated protein 2 | chr2:14603267-14612387 FORWARD LENGTH=1623	-1.51	-0.112	-0.426	0.616	-1.58	1.2	-0.0165	0.9	-0.122	0.44	0.424	1	0.919	1	0.0452	0.669	1	0.877	1	0.874
TR10813|c3_g2_i1	AT1G30400.2 | Symbols: ATMRP1, EST1, ABCC1 | multidrug resistance-associated protein 1 | chr1:10728139-10737697 FORWARD LENGTH=1622	1.06	0.212	0.458	0.531	-0.138	2.14	0.393	0.666	0.378	0.703	0.297	1	0.744	0.812	0.848	0.00904	0.761	0.63	0.987	0.307
TR10817|c2_g1_i1	AT5G43310.3 | Symbols: | COP1-interacting protein-related | chr5:17379883-17385387 REVERSE LENGTH=1164	-0.375	-0.126	-0.196	-0.0848	0.0316	-1.33	-0.356	-0.19	-0.287	-0.498	0.684	1	0.901	1	0.964	0.0343	0.608	1	0.963	0.306
TR10820|c3_g4_i3	AT4G11530.1 | Symbols: CRK34 | cysteine-rich RLK (RECEPTOR-like protein kinase) 34 | chr4:6987093-6989599 FORWARD LENGTH=669	-0.47	1.42	-0.562	-0.62	-0.709	6.85	1.65	2.01	1.85	1.34	0.922	0.857	0.936	1	0.629	0.00021	0.384	0.462	0.475	0.542
TR10829|c0_g1_i2	AT1G76520.2 | Symbols: | Auxin efflux carrier family protein | chr1:28715384-28717289 FORWARD LENGTH=390	-5.37	-2.47	-0.914	-1.42	-0.567	-0.374	0.59	-0.224	-0.743	0.0032	0.075	0.0422	0.838	1	0.655	0.956	0.868	1	1	1
TR10833|c1_g1_i1	AT3G05660.1 | Symbols: AtRLP33, RLP33 | receptor like protein 33 | chr3:1649258-1652001 REVERSE LENGTH=875	-2.13	-0.427	-0.761	-0.129	-0.809	-0.309	-0.37	-0.456	0.237	0.281	0.0377	0.999	0.513	1	0.188	0.907	0.81	0.988	1	0.869
TR10839|c0_g2_i2	AT1G53750.1 | Symbols: RPT1A | regulatory particle triple-A 1A | chr1:20065921-20068324 REVERSE LENGTH=426	-0.569	0.00394	0.0289	0.0173	-0.619	0.249	-0.0466	0.263	0.0204	0.0124	0.432	1	0.997	1	0.038	0.859	0.983	0.994	1	1
TR10841|c2_g1_i2	No informative hit E<10-6	1.47	-0.225	0.303	-0.896	2.29	1.15	-0.281	0.162	0.601	0.665	0.65	1	0.977	1	0.0422	0.835	0.971	1	1	0.877
TR10844|c4_g1_i1	AT5G04940.2 | Symbols: SUVH1 | SU(VAR)3-9 homolog 1 | chr5:1454616-1456628 REVERSE LENGTH=670	-2.48	-0.438	-0.737	-0.166	-1.14	-1.27	-0.248	-0.239	-0.152	-0.635	0.032	1	0.647	1	0.0695	0.489	0.931	1	1	0.629
TR10845|c2_g6_i3	AT1G05850.1 | Symbols: POM1, ERH2, ELP1, CTL1, ELP, HOT2, ATCTL1 | Chitinase family protein | chr1:1766833-1768117 REVERSE LENGTH=321	-1.41	-0.351	-0.0964	-0.0581	-0.909	-0.842	0.00555	-0.139	-0.412	-0.297	0.145	1	0.983	1	0.0486	0.584	1	1	0.971	0.842
TR10851|c0_g1_i2	AT2G33770.1 | Symbols: UBC24, ATUBC24, PHO2 | phosphate 2 | chr2:14277785-14281482 REVERSE LENGTH=907	-1.89	-0.251	-0.217	-0.0327	-1.39	-0.364	-0.00842	-0.00355	0.0868	-0.439	0.0922	1	0.954	1	0.00918	0.899	1	1	1	0.765
TR10853|c0_g5_i1	AT5G26820.1 | Symbols: ATIREG3, MAR1, RTS3, IREG3 | iron-regulated protein 3 | chr5:9433858-9437005 FORWARD LENGTH=598	1.47	0.388	0.503	0.238	0.345	1.82	0.64	0.632	0.245	0.3	0.0696	0.962	0.684	1	0.461	0.0197	0.289	0.662	1	0.782
TR10855|c0_g1_i11	AT1G73480.1 | Symbols: | alpha/beta-Hydrolases superfamily protein | chr1:27629266-27632486 FORWARD LENGTH=463	1.31	0.318	-0.275	0.167	1.1	1.57	1.14	-0.0727	-0.0268	0.534	0.311	1	0.925	1	0.019	0.268	0.0267	1	1	0.592
TR10855|c0_g1_i2	AT1G73480.1 | Symbols: | alpha/beta-Hydrolases superfamily protein | chr1:27629266-27632486 FORWARD LENGTH=463	2.51	0.433	0.0698	0.696	1.31	1.68	1.13	-0.0202	0.277	0.289	0.0178	0.988	0.993	0.955	0.00275	0.205	0.0213	1	1	0.853
TR10855|c0_g1_i4	AT1G73480.1 | Symbols: | alpha/beta-Hydrolases superfamily protein | chr1:27629266-27632486 FORWARD LENGTH=463	2.46	0.308	-0.132	1.19	1.09	1.3	1.31	0.175	-0.3	0.111	0.0349	1	0.978	0.646	0.0198	0.478	0.00413	1	1	0.965
TR10855|c0_g1_i7	AT1G73480.1 | Symbols: | alpha/beta-Hydrolases superfamily protein | chr1:27629266-27632486 FORWARD LENGTH=463	1.53	0.358	-0.738	0.469	1.44	1.17	1.22	-0.192	0.121	0.0293	0.344	1	0.659	1	0.00649	0.585	0.05	1	1	0.998
TR10860|c1_g2_i2	AT3G56850.1 | Symbols: AREB3, DPBF3 | ABA-responsive element binding protein 3 | chr3:21046554-21047894 REVERSE LENGTH=297	1.78	0.214	0.828	-0.336	1.07	0.935	0.525	0.0244	0.161	0.225	0.08	1	0.413	1	0.0233	0.584	0.664	1	1	0.907
TR10860|c1_g2_i5	AT3G56850.1 | Symbols: AREB3, DPBF3 | ABA-responsive element binding protein 3 | chr3:21046554-21047894 REVERSE LENGTH=297	2.08	0.686	-0.379	-0.455	2.22	0.408	0.893	0.0861	-0.178	-0.393	0.308	1	0.947	1	0.00815	0.938	0.665	1	1	0.911
TR10869|c3_g1_i2	No informative hit E<10-6	-3.27	-0.708	-1.63	-0.724	-0.209	-0.447	-0.203	-0.0408	0.00953	-0.213	0.0441	0.981	0.206	0.968	0.9	0.921	0.965	1	1	0.964
TR10873|c0_g1_i2	AT1G70620.3 | Symbols: | cyclin-related | chr1:26626634-26630777 FORWARD LENGTH=957	-1.41	-0.339	-0.393	-0.292	-0.391	-0.383	-0.315	0.208	-0.119	-0.157	0.0265	0.94	0.669	0.981	0.34	0.782	0.705	1	1	0.906
TR10876|c5_g1_i1	AT3G23890.1 | Symbols: TOPII, ATTOPII | topoisomerase II | chr3:8624931-8631106 FORWARD LENGTH=1473	-8.67	-0.838	-5.75	-1.84	-0.248	-1.85	-0.616	0.759	-0.712	-1.28	0.00415	1	0.0251	0.586	0.945	0.66	0.871	1	1	0.717
TR10889|c0_g3_i2	AT5G57040.1 | Symbols: | Lactoylglutathione lyase / glyoxalase I family protein | chr5:23084035-23085116 REVERSE LENGTH=197	-1.54	-0.26	-0.668	0.000783	-0.616	-3.89	-0.578	-0.56	-1.4	-1.35	0.485	1	0.852	1	0.587	0.0233	0.852	1	0.517	0.35
TR10893|c0_g1_i12	AT4G23100.3 | Symbols: GSH1 | glutamate-cysteine ligase | chr4:12103458-12106751 REVERSE LENGTH=522	1.83	0.479	0.539	0.31	0.498	1.53	0.352	0.634	0.311	0.235	0.0376	0.923	0.669	1	0.362	0.141	0.797	0.714	1	0.888
TR10893|c0_g1_i13	AT4G23100.3 | Symbols: GSH1 | glutamate-cysteine ligase | chr4:12103458-12106751 REVERSE LENGTH=522	1.82	0.745	0.7	0.3	0.0704	0.495	0.222	0.229	0.0584	-0.0133	0.0248	0.368	0.413	1	0.934	0.781	0.9	1	1	1
TR10893|c0_g1_i15	AT4G23100.3 | Symbols: GSH1 | glutamate-cysteine ligase | chr4:12103458-12106751 REVERSE LENGTH=522	0.931	0.229	0.222	0.522	-0.042	1.67	0.521	0.304	0.525	0.315	0.33	1	0.924	0.735	0.962	0.0428	0.493	1	0.729	0.788
TR10893|c0_g1_i5	AT4G23100.3 | Symbols: GSH1 | glutamate-cysteine ligase | chr4:12103458-12106751 REVERSE LENGTH=522	1.81	0.77	0.415	0.359	0.269	1.42	0.778	0.423	-0.0136	0.228	0.00754	0.16	0.716	0.942	0.596	0.0722	0.0575	0.893	1	0.861
TR10895|c0_g1_i4	AT2G42400.1 | Symbols: VOZ2, ATVOZ2 | vascular plant one zinc finger protein 2 | chr2:17654490-17656281 REVERSE LENGTH=450	0.673	0.0561	0.0692	-0.291	0.839	-0.55	-0.197	-0.135	-0.0437	-0.175	0.489	1	0.988	1	0.0362	0.7	0.903	1	1	0.912
TR10901|c1_g2_i2	AT2G20560.1 | Symbols: | DNAJ heat shock family protein | chr2:8848353-8849815 REVERSE LENGTH=337	2.45	1.05	0.573	0.459	0.373	3.3	1.38	-0.112	0.49	1.54	0.0544	0.493	0.813	1	0.648	0.00288	0.0462	1	1	0.00782
TR10901|c1_g2_i3	AT2G20560.1 | Symbols: | DNAJ heat shock family protein | chr2:8848353-8849815 REVERSE LENGTH=337	1.89	1.03	-0.159	0.203	0.814	2.38	1.39	-0.24	0.102	1.13	0.0243	0.057	0.962	1	0.0389	0.00141	0.000138	1	1	0.00122
TR10901|c1_g2_i4	AT2G20560.1 | Symbols: | DNAJ heat shock family protein | chr2:8848353-8849815 REVERSE LENGTH=337	2.25	0.818	0.388	0.196	0.846	1.11	0.802	-0.22	-0.0448	0.575	0.0276	0.547	0.871	1	0.0973	0.517	0.319	1	1	0.57
TR10920|c0_g1_i1	AT5G12010.1 | Symbols: | unknown protein; INVOLVED IN: response to salt stress; LOCATED IN: chloroplast, plasma membrane, membrane; EXPRESSED IN: 23 plant structures; EXPRESSED DURING: 13 growth stages; BEST Arabidopsis thaliana protein match is: unknown protein (TAIR:AT4G29780.1); Has 1807 Blast hits to 1807 proteins in 277 species: Archae - 0; Bacteria - 0; Metazoa - 736; Fungi - 347; Plants - …	1.95	-0.244	0.824	-0.155	1.52	2.18	1.32	0.158	-0.0908	0.791	0.206	1	0.71	1	0.037	0.204	0.108	1	1	0.618
TR10927|c0_g2_i10	AT5G35360.1 | Symbols: CAC2 | acetyl Co-enzyme a carboxylase biotin carboxylase subunit | chr5:13584300-13588268 FORWARD LENGTH=537	2.46	-0.0205	0.323	1.37	0.787	1.02	0.151	0.108	0.242	0.522	0.0178	1	0.905	0.0371	0.234	0.598	0.965	1	1	0.748
TR10934|c2_g1_i2	AT1G48120.1 | Symbols: | hydrolases;protein serine/threonine phosphatases | chr1:17774238-17779624 REVERSE LENGTH=1340	3.29	0.856	0.495	1.21	0.722	4.46	3.16	0.459	0.586	0.248	0.247	1	0.958	0.952	0.668	0.112	0.0184	1	1	0.972
TR10934|c2_g1_i6	AT1G48120.1 | Symbols: | hydrolases;protein serine/threonine phosphatases | chr1:17774238-17779624 REVERSE LENGTH=1340	4.15	1.03	0.725	0.809	1.58	4.99	3.8	0.429	0.56	0.198	0.159	1	0.931	1	0.307	0.0974	0.00641	1	1	0.981
TR10942|c3_g3_i3	AT3G10405.1 | Symbols: | unknown protein; FUNCTIONS IN: molecular_function unknown; INVOLVED IN: pollen development; LOCATED IN: chloroplast; Has 44 Blast hits to 44 proteins in 20 species: Archae - 0; Bacteria - 4; Metazoa - 0; Fungi - 0; Plants - 39; Viruses - 0; Other Eukaryotes - 1 (source: NCBI BLink). | chr3:3233978-3235118 REVERSE LENGTH=212	-0.482	0.0367	-0.172	-0.375	0.0292	1.85	0.152	1.38	-0.0555	0.371	0.774	1	0.965	1	0.984	0.0974	0.959	0.0159	1	0.809
TR10943|c0_g1_i1	AT3G46600.2 | Symbols: | GRAS family transcription factor | chr3:17158379-17159799 FORWARD LENGTH=453	-4.31	-0.772	-0.918	-1.46	-1.16	-0.26	-0.26	0.94	-0.395	-0.545	0.000921	0.973	0.669	0.216	0.143	0.961	0.952	0.854	1	0.832
TR10943|c0_g1_i2	AT3G46600.2 | Symbols: | GRAS family transcription factor | chr3:17158379-17159799 FORWARD LENGTH=453	-4.01	-0.812	-1.04	-1.5	-0.661	-0.456	-0.0865	0.84	-0.536	-0.674	0.00308	0.963	0.584	0.197	0.462	0.915	0.991	0.913	1	0.759
TR10947|c0_g1_i1	AT3G16050.1 | Symbols: A37, ATPDX1.2, PDX1.2 | pyridoxine biosynthesis 1.2 | chr3:5444121-5445065 REVERSE LENGTH=314	3.21	1.5	0.467	0.218	1.02	1.48	1.16	-0.295	-0.00732	0.616	0.000281	0.00151	0.839	1	0.0426	0.286	0.0181	1	1	0.504
TR10947|c0_g1_i2	AT3G16050.1 | Symbols: A37, ATPDX1.2, PDX1.2 | pyridoxine biosynthesis 1.2 | chr3:5444121-5445065 REVERSE LENGTH=314	1.7	1.13	0.242	0.089	0.242	2.41	1.72	-0.0967	0.0123	0.78	0.255	0.329	0.965	1	0.808	0.0968	0.00195	1	1	0.483
TR10947|c0_g1_i3	AT3G16050.1 | Symbols: A37, ATPDX1.2, PDX1.2 | pyridoxine biosynthesis 1.2 | chr3:5444121-5445065 REVERSE LENGTH=314	2.19	1.15	0.0917	0.219	0.736	1.61	1.55	-0.804	0.0405	0.826	0.0549	0.101	0.993	1	0.218	0.277	0.000794	0.791	1	0.271
TR10947|c0_g1_i4	AT3G16050.1 | Symbols: A37, ATPDX1.2, PDX1.2 | pyridoxine biosynthesis 1.2 | chr3:5444121-5445065 REVERSE LENGTH=314	2.39	0.847	0.543	0.714	0.282	1.41	1.6	-0.602	-0.224	0.635	0.0308	0.493	0.824	0.783	0.724	0.407	0.000741	0.976	1	0.538
TR10947|c0_g1_i6	AT3G16050.1 | Symbols: A37, ATPDX1.2, PDX1.2 | pyridoxine biosynthesis 1.2 | chr3:5444121-5445065 REVERSE LENGTH=314	3.03	1.34	0.494	0.167	1.03	2.26	1.18	-0.0838	0.137	1.03	0.0048	0.0388	0.861	1	0.0795	0.0584	0.042	1	1	0.12
TR10953|c1_g2_i3	AT2G28380.1 | Symbols: DRB2 | dsRNA-binding protein 2 | chr2:12134098-12135915 REVERSE LENGTH=434	0.752	0.157	1.62	-0.27	-0.753	5.49	2.57	0.764	1.07	1.08	0.838	1	0.629	1	0.603	0.00123	0.0105	1	0.884	0.58
TR10955|c1_g2_i4	AT5G63700.1 | Symbols: | zinc ion binding;DNA binding | chr5:25493934-25497632 REVERSE LENGTH=602	1.69	0.376	0.0992	0.343	0.87	-0.264	0.111	-0.317	0.0862	-0.144	0.0509	0.998	0.982	1	0.0437	0.912	0.966	1	1	0.942
TR10957|c1_g4_i3	AT1G48790.1 | Symbols: AMSH1 | associated molecule with the SH3 domain of STAM 1 | chr1:18043925-18047427 REVERSE LENGTH=507	1.84	0.411	-0.0161	-0.0651	1.51	0.842	0.348	-0.287	0.403	0.378	0.115	1	1	1	0.00576	0.677	0.873	1	1	0.829
TR10958|c3_g1_i6	AT2G40690.1 | Symbols: GLY1, SFD1 | NAD-dependent glycerol-3-phosphate dehydrogenase family protein | chr2:16974107-16976241 FORWARD LENGTH=420	-6.17	-1.72	-1.7	-0.232	-2.52	0.252	0.316	-0.162	0.188	-0.0898	0.0146	0.662	0.575	1	0.125	0.978	0.959	1	1	0.995
TR10962|c0_g1_i1	AT4G37260.1 | Symbols: MYB73, ATMYB73 | myb domain protein 73 | chr4:17540602-17541564 FORWARD LENGTH=320	-0.486	0.529	0.428	-1.14	-0.308	-1.34	-1.27	0.252	-0.162	-0.16	0.745	0.904	0.818	0.108	0.641	0.313	0.00578	1	1	0.944
TR10962|c0_g1_i4	AT4G37260.1 | Symbols: MYB73, ATMYB73 | myb domain protein 73 | chr4:17540602-17541564 FORWARD LENGTH=320	-0.487	0.589	0.552	-1.32	-0.308	-1.02	-1	0.336	-0.0703	-0.284	0.762	0.874	0.737	0.0475	0.665	0.555	0.119	1	1	0.876
TR10968|c0_g2_i1	AT1G72520.1 | Symbols: LOX4 | PLAT/LH2 domain-containing lipoxygenase family protein | chr1:27308611-27312589 FORWARD LENGTH=926	-2.99	-0.951	-1.09	-0.159	-0.796	-4	-1.33	-1.18	-0.11	-1.39	0.0886	0.902	0.627	1	0.464	0.0127	0.321	0.732	1	0.293
TR10968|c0_g2_i2	AT3G45140.1 | Symbols: LOX2, ATLOX2 | lipoxygenase 2 | chr3:16525437-16529233 FORWARD LENGTH=896	-3	-1.32	-0.789	0.429	-1.33	-2.23	-0.32	-0.525	-0.421	-0.966	0.0473	0.449	0.743	1	0.105	0.267	0.933	1	1	0.51
TR10968|c0_g2_i3	AT3G45140.1 | Symbols: LOX2, ATLOX2 | lipoxygenase 2 | chr3:16525437-16529233 FORWARD LENGTH=896	-3.26	-1.07	-0.913	0.123	-1.4	-2.62	-0.37	-0.878	-0.312	-1.06	0.00818	0.544	0.575	1	0.0393	0.0655	0.893	0.787	1	0.304
TR10968|c0_g2_i4	AT3G45140.1 | Symbols: LOX2, ATLOX2 | lipoxygenase 2 | chr3:16525437-16529233 FORWARD LENGTH=896	-3.26	-1.02	-0.99	-0.0138	-1.24	-3.35	-0.791	-0.998	-0.523	-1.04	0.0192	0.727	0.588	1	0.109	0.0167	0.644	0.746	1	0.405
TR10968|c0_g2_i5	AT3G45140.1 | Symbols: LOX2, ATLOX2 | lipoxygenase 2 | chr3:16525437-16529233 FORWARD LENGTH=896	-3.96	-1.33	-1.13	-0.0794	-1.43	-3.34	-0.593	-1.01	-0.644	-1.09	0.00863	0.527	0.568	1	0.0983	0.0456	0.827	0.841	1	0.461
TR10968|c0_g2_i6	AT3G45140.1 | Symbols: LOX2, ATLOX2 | lipoxygenase 2 | chr3:16525437-16529233 FORWARD LENGTH=896	-3.13	-1.03	-0.895	-0.183	-1.02	-2.26	-0.391	-0.834	-0.239	-0.794	0.0104	0.579	0.582	1	0.15	0.142	0.879	0.818	1	0.543
TR10968|c0_g2_i7	AT3G45140.1 | Symbols: LOX2, ATLOX2 | lipoxygenase 2 | chr3:16525437-16529233 FORWARD LENGTH=896	-3.51	-1.14	-1.08	0.0641	-1.36	-2.64	-0.352	-0.838	-0.351	-1.1	0.0117	0.613	0.526	1	0.0848	0.122	0.917	0.904	1	0.379
TR10969|c3_g3_i2	AT1G22150.1 | Symbols: SULTR1;3 | sulfate transporter 1;3 | chr1:7818361-7821344 FORWARD LENGTH=656	-0.733	0.443	0.648	-0.46	-1.36	-0.898	0.292	-0.342	-0.228	-0.621	0.726	1	0.798	1	0.0484	0.732	0.925	1	1	0.69
TR10971|c4_g2_i3	AT1G10840.1 | Symbols: TIF3H1 | translation initiation factor 3 subunit H1 | chr1:3607885-3610299 REVERSE LENGTH=337	-2.05	0.121	-0.529	-0.396	-1.25	-0.399	0.00495	0.15	-0.154	-0.401	0.0333	1	0.729	1	0.0111	0.872	1	1	1	0.773
TR10975|c2_g1_i3	No informative hit E<10-6	-3.35	-1.39	-0.599	-0.921	-0.439	0.0452	0.292	0.149	0.0478	-0.444	0.0121	0.279	0.838	0.761	0.642	1	0.932	1	1	0.848
TR10982|c0_g1_i2	AT1G10510.1 | Symbols: emb2004 | RNI-like superfamily protein | chr1:3461771-3465590 FORWARD LENGTH=605	1.84	0.381	0.234	0.387	0.84	0.64	0.23	-0.0102	0.163	0.257	0.0245	0.988	0.917	0.96	0.0772	0.689	0.894	1	1	0.87
TR10997|c2_g1_i10	AT2G38530.1 | Symbols: LTP2, LP2, cdf3 | lipid transfer protein 2 | chr2:16128481-16128948 FORWARD LENGTH=118	1.94	0.448	0.301	-0.0551	1.24	-0.317	-0.00178	-0.345	-0.0688	0.0984	0.12	1	0.932	1	0.0344	0.928	1	1	1	0.979
TR11010|c0_g2_i4	AT1G53760.2 | Symbols: | unknown protein; FUNCTIONS IN: molecular_function unknown; INVOLVED IN: biological_process unknown; LOCATED IN: mitochondrion, plastid; EXPRESSED IN: 23 plant structures; EXPRESSED DURING: 13 growth stages; CONTAINS InterPro DOMAIN/s: Protein of unknown function DUF2343 (InterPro:IPR018786). | chr1:20069266-20070918 REVERSE LENGTH=212	-3.28	-1.15	0.2	-0.737	-1.59	-1.85	-1.05	-0.204	-0.355	-0.242	0.0466	0.659	0.98	0.958	0.0982	0.439	0.448	1	1	0.952
TR11020|c3_g1_i1	AT5G62480.1 | Symbols: ATGSTU9, GST14, GST14B, GSTU9 | glutathione S-transferase tau 9 | chr5:25088775-25089566 REVERSE LENGTH=240	6.18	2.08	1.66	1.38	1.06	6.29	2	1.66	1.77	0.859	2.65e-05	0.082	0.305	0.523	0.338	6.49e-06	0.0543	0.362	0.246	0.715
TR11020|c3_g1_i5	AT5G62480.1 | Symbols: ATGSTU9, GST14, GST14B, GSTU9 | glutathione S-transferase tau 9 | chr5:25088775-25089566 REVERSE LENGTH=240	5.75	2.58	0.882	1.18	1.11	5.54	1.24	1.4	1.56	1.34	0.00112	0.0388	0.815	0.807	0.385	0.00119	0.542	0.701	0.521	0.499
TR11028|c0_g1_i7	AT2G16230.1 | Symbols: | O-Glycosyl hydrolases family 17 protein | chr2:7035463-7038326 REVERSE LENGTH=503	-0.863	-0.00818	0.296	0.464	-1.61	0.175	0.689	0.367	-0.22	-0.662	0.666	1	0.949	1	0.0468	0.972	0.623	1	1	0.683
TR11031|c0_g2_i5	AT5G03700.1 | Symbols: | D-mannose binding lectin protein with Apple-like carbohydrate-binding domain | chr5:965874-967322 REVERSE LENGTH=482	1.14	0.0553	0.0254	0.261	0.794	2.47	1.5	0.786	-0.122	0.304	0.393	1	1	1	0.189	0.096	0.0279	0.854	1	0.906
TR11031|c0_g2_i6	AT5G03700.1 | Symbols: | D-mannose binding lectin protein with Apple-like carbohydrate-binding domain | chr5:965874-967322 REVERSE LENGTH=482	1.09	0.103	0.078	0.0655	0.846	3.17	1.63	1.03	0.185	0.33	0.546	1	0.995	1	0.294	0.0337	0.0617	0.729	1	0.91
TR11054|c2_g1_i1	AT5G12380.1 | Symbols: ANNAT8 | annexin 8 | chr5:4009223-4010687 FORWARD LENGTH=316	6.13	1.35	1.32	0.821	2.64	6.08	0.628	2.64	1.49	1.32	0.00024	0.739	0.617	1	0.00574	0.000294	0.876	0.0433	0.581	0.484
TR11062|c0_g1_i8	AT4G36920.2 | Symbols: AP2 | Integrase-type DNA-binding superfamily protein | chr4:17400998-17403140 FORWARD LENGTH=432	-0.933	-0.0762	-0.238	-0.216	-0.403	-1.64	-0.678	-0.503	-0.101	-0.355	0.281	1	0.9	1	0.384	0.0227	0.143	0.753	1	0.707
TR11070|c1_g2_i5	AT1G43190.3 | Symbols: PTB3 | polypyrimidine tract-binding protein 3 | chr1:16275432-16278185 REVERSE LENGTH=430	2.03	0.328	0.572	-0.374	1.5	-0.325	0.309	-0.577	0.431	-0.487	0.0685	1	0.731	1	0.00661	0.915	0.891	0.929	0.99	0.756
TR11084|c1_g1_i5	AT3G13470.1 | Symbols: | TCP-1/cpn60 chaperonin family protein | chr3:4389685-4392624 FORWARD LENGTH=596	1.05	0.332	0.174	0.101	0.443	1.75	0.345	0.494	0.398	0.512	0.223	1	0.945	1	0.324	0.0196	0.757	0.818	0.928	0.471
TR11996|c3_g1_i3	AT1G11660.1 | Symbols: | heat shock protein 70 (Hsp 70) family protein | chr1:3921056-3924347 FORWARD LENGTH=763	-2.86	-0.311	-0.548	-0.322	-1.68	0.335	-0.301	0.0928	0.614	-0.0706	0.0121	1	0.743	1	0.0296	0.912	0.877	1	0.871	0.989
TR11997|c1_g1_i1	ATMG00860.1 | Symbols: ORF158 | DNA/RNA polymerases superfamily protein | chrM:235916-236392 FORWARD LENGTH=158	1.29	0.663	-0.711	0.248	1.09	0.484	-1.22	-0.982	-0.177	2.86	0.704	1	0.907	1	0.443	0.949	0.653	1	1	0.0148
TR11999|c0_g1_i2	AT1G60670.1 | Symbols: | Protein of unknown function (DUF3755) | chr1:22344099-22346773 FORWARD LENGTH=201	-2.27	-0.297	-0.557	-0.238	-1.18	-1.21	-0.168	-0.134	-0.416	-0.498	0.000347	1	0.512	1	0.00123	0.167	0.921	1	0.843	0.456
TR12004|c4_g2_i3	ATMG00860.1 | Symbols: ORF158 | DNA/RNA polymerases superfamily protein | chrM:235916-236392 FORWARD LENGTH=158	16.3	8.14	0.784	4.41	2.93	6.24	-2.26	4.16	1.49	2.86	0.00493	0.183	0.974	0.727	0.407	0.488	0.801	0.791	1	0.717
TR12004|c4_g2_i4	ATMG00860.1 | Symbols: ORF158 | DNA/RNA polymerases superfamily protein | chrM:235916-236392 FORWARD LENGTH=158	14.7	8.34	0.339	4.17	1.81	6.79	-2.62	6.96	1.18	1.27	0.00406	0.0717	0.993	0.666	0.581	0.326	0.683	0.232	1	0.897
TR12004|c4_g2_i5	No informative hit E<10-6	13.4	5.78	1.31	4.05	2.3	7.47	-1.94	2.58	3.17	3.66	0.0433	0.642	0.953	0.849	0.602	0.455	0.878	1	0.96	0.667
TR12010|c2_g1_i10	AT1G32490.1 | Symbols: EMB2733, ESP3 | RNA helicase family protein | chr1:11742356-11749286 REVERSE LENGTH=1044	0.828	0.425	-1.3	3.35	-1.64	-9.12	-2.8	-4.84	-1.47	-0.00642	0.916	1	0.855	0.439	0.573	0.0271	0.354	0.387	1	1
TR12012|c5_g1_i3	AT4G30110.1 | Symbols: HMA2, ATHMA2 | heavy metal atpase 2 | chr4:14720253-14724577 REVERSE LENGTH=951	-1.32	-0.257	-0.778	-0.939	0.655	-5.02	-0.996	-1.69	-2.64	0.301	0.646	1	0.856	0.975	0.631	0.00783	0.709	0.55	0.0608	0.952
TR12025|c6_g1_i3	AT1G03220.1 | Symbols: | Eukaryotic aspartyl protease family protein | chr1:787143-788444 FORWARD LENGTH=433	3.74	0.775	1.07	0.628	1.27	2.66	0.302	0.981	0.703	0.67	0.00024	0.815	0.336	0.901	0.0467	0.0334	0.918	0.553	0.816	0.658
TR12025|c6_g1_i5	AT1G03220.1 | Symbols: | Eukaryotic aspartyl protease family protein | chr1:787143-788444 FORWARD LENGTH=433	3.27	1.08	0.839	0.315	1.04	2.58	0.171	1.05	0.868	0.486	0.00705	0.536	0.625	1	0.163	0.0788	0.968	0.574	0.71	0.828
TR12026|c2_g2_i6	AT1G78995.1 | Symbols: | unknown protein; Has 30201 Blast hits to 17322 proteins in 780 species: Archae - 12; Bacteria - 1396; Metazoa - 17338; Fungi - 3422; Plants - 5037; Viruses - 0; Other Eukaryotes - 2996 (source: NCBI BLink). | chr1:29715433-29716079 REVERSE LENGTH=159	2.51	0.818	0.561	0.259	0.872	-0.207	0.343	-0.361	-0.109	-0.0803	0.012	0.707	0.736	1	0.112	0.951	0.86	1	1	0.98
TR12038|c3_g4_i3	AT4G10890.1 | Symbols: | unknown protein; CONTAINS InterPro DOMAIN/s: Protein of unknown function DUF2439 (InterPro:IPR018838); BEST Arabidopsis thaliana protein match is: unknown protein (TAIR:AT1G43722.1); Has 30201 Blast hits to 17322 proteins in 780 species: Archae - 12; Bacteria - 1396; Metazoa - 17338; Fungi - 3422; Plants - 5037; Viruses - 0; Other Eukaryotes - 2996 (source: NCBI BLink). |…	5.35	1.23	0.942	2.44	0.744	-1.53	-0.149	-0.228	0.385	-1.53	0.00157	0.762	0.736	0.032	0.62	0.644	0.983	1	1	0.267
TR12045|c1_g1_i1	AT1G16540.1 | Symbols: SIR3, LOS5, ABA3, ATABA3, ACI2 | molybdenum cofactor sulfurase (LOS5) (ABA3) | chr1:5659465-5665201 FORWARD LENGTH=819	-1.15	-0.155	0.271	0.0984	-1.37	-0.0949	0.0283	-0.186	0.216	-0.153	0.371	1	0.931	1	0.0119	0.987	0.997	1	1	0.955
TR12061|c2_g2_i2	AT3G52500.1 | Symbols: | Eukaryotic aspartyl protease family protein | chr3:19465644-19467053 REVERSE LENGTH=469	-2.87	-0.799	-0.809	-0.21	-1.05	-0.955	-0.122	0.302	-0.33	-0.805	0.0289	0.864	0.679	1	0.157	0.711	0.98	1	1	0.545
TR12069|c1_g2_i1	AT4G25650.2 | Symbols: ACD1-LIKE, PTC52, TIC55-IV | ACD1-like | chr4:13081021-13083153 REVERSE LENGTH=559	2.89	0.0064	0.127	0.162	2.6	-1.04	-0.0996	-0.0672	-0.39	-0.482	0.172	1	0.993	1	0.0144	0.808	0.991	1	1	0.915
TR12069|c1_g2_i2	AT4G25650.1 | Symbols: ACD1-LIKE, PTC52, TIC55-IV | ACD1-like | chr4:13081021-13083153 REVERSE LENGTH=536	3.27	0.225	0.296	-0.0924	2.84	-0.799	-0.2	0.0163	-0.218	-0.398	0.151	1	0.972	1	0.0111	0.887	0.977	1	1	0.948
TR12072|c4_g1_i1	AT2G18960.1 | Symbols: AHA1, PMA, OST2, HA1 | H(+)-ATPase 1 | chr2:8221858-8227268 FORWARD LENGTH=949	-3.49	-0.211	-0.97	-0.678	-1.63	-1.63	-0.147	0.417	-0.903	-0.996	0.000213	1	0.38	0.807	0.00176	0.277	0.966	1	0.512	0.191
TR12074|c1_g2_i1	AT4G19120.2 | Symbols: ERD3 | S-adenosyl-L-methionine-dependent methyltransferases superfamily protein | chr4:10460665-10463034 REVERSE LENGTH=600	-2.24	-0.552	-0.521	0.00629	-1.17	-1.52	-0.411	-0.321	-0.524	-0.264	0.0161	0.901	0.732	1	0.016	0.221	0.78	1	0.903	0.884
TR12074|c1_g2_i2	AT1G31850.2 | Symbols: | S-adenosyl-L-methionine-dependent methyltransferases superfamily protein | chr1:11431165-11433443 FORWARD LENGTH=603	-3.93	-1.36	-0.788	-0.383	-1.4	-2.15	-0.3	-0.477	-1.38	0.00193	0.0162	0.466	0.779	1	0.209	0.353	0.938	1	0.427	1
TR12084|c1_g1_i9	No informative hit E<10-6	2.28	0.928	0.87	0.495	-0.0131	3.86	0.885	0.519	0.836	1.62	0.267	0.948	0.769	1	0.999	0.0296	0.697	1	0.958	0.197
TR12089|c4_g2_i2	AT2G47500.1 | Symbols: | P-loop nucleoside triphosphate hydrolases superfamily protein with CH (Calponin Homology) domain | chr2:19493247-19497882 FORWARD LENGTH=983	-2.26	-0.168	-0.997	-0.0199	-1.08	-1.44	-0.284	0.364	-0.702	-0.822	0.0319	1	0.254	1	0.0975	0.281	0.883	1	0.654	0.317
TR12104|c1_g2_i1	AT5G13930.1 | Symbols: CHS, TT4, ATCHS | Chalcone and stilbene synthase family protein | chr5:4488762-4490035 FORWARD LENGTH=395	1.46	0.346	0.245	0.28	0.588	1.87	2.19	-0.179	-0.0927	-0.0563	0.361	1	0.962	1	0.477	0.256	2.21e-05	1	1	0.992
TR12104|c1_g2_i2	AT5G13930.1 | Symbols: CHS, TT4, ATCHS | Chalcone and stilbene synthase family protein | chr5:4488762-4490035 FORWARD LENGTH=395	2.3	0.91	0.375	0.233	0.784	0.849	1.65	0.0416	-0.187	-0.656	0.0389	0.6	0.899	1	0.211	0.66	0.000237	1	1	0.505
TR12112|c1_g2_i10	AT2G21190.1 | Symbols: | ER lumen protein retaining receptor family protein | chr2:9080916-9082642 FORWARD LENGTH=269	0.472	-0.393	0.22	-0.0667	0.712	0.209	0.411	-0.34	-0.211	0.351	0.585	0.83	0.874	1	0.0298	0.903	0.476	0.917	1	0.63
TR12119|c0_g1_i2	AT5G53000.1 | Symbols: TAP46 | 2A phosphatase associated protein of 46 kD | chr5:21485654-21487869 REVERSE LENGTH=405	0.568	0.902	-0.0953	-0.722	0.484	-5.33	-0.585	0.254	-4.05	-0.948	0.925	1	1	1	0.831	0.0884	0.935	1	0.0314	0.832
TR12120|c0_g2_i1	AT1G59900.1 | Symbols: AT-E1 ALPHA, E1 ALPHA | pyruvate dehydrogenase complex E1 alpha subunit | chr1:22051368-22053660 FORWARD LENGTH=389	-2.04	-0.385	-0.316	-0.196	-1.15	-0.496	-0.26	0.278	0.0062	-0.521	0.013	0.996	0.87	1	0.0071	0.792	0.878	1	1	0.55
TR12120|c0_g2_i2	AT1G59900.1 | Symbols: AT-E1 ALPHA, E1 ALPHA | pyruvate dehydrogenase complex E1 alpha subunit | chr1:22051368-22053660 FORWARD LENGTH=389	-1.48	-0.176	-0.373	0.161	-1.09	-0.8	-0.347	-0.0215	-0.321	-0.111	0.162	1	0.856	1	0.0296	0.655	0.835	1	1	0.968
TR12120|c0_g2_i3	AT1G59900.1 | Symbols: AT-E1 ALPHA, E1 ALPHA | pyruvate dehydrogenase complex E1 alpha subunit | chr1:22051368-22053660 FORWARD LENGTH=389	-2	-0.229	-0.493	-0.133	-1.14	-0.383	0.0605	-0.168	0.0314	-0.307	0.0459	1	0.757	1	0.0319	0.884	0.989	1	1	0.869
TR12124|c2_g1_i5	AT5G05200.1 | Symbols: | Protein kinase superfamily protein | chr5:1544206-1547082 REVERSE LENGTH=540	1.74	0.386	-0.21	0.0302	1.54	0.486	0.859	-0.406	0.31	-0.277	0.0864	1	0.949	1	0.000588	0.832	0.216	1	1	0.874
TR12127|c1_g1_i1	AT2G30300.1 | Symbols: | Major facilitator superfamily protein | chr2:12919401-12921222 FORWARD LENGTH=500	5.22	0.562	0.972	1.32	2.37	0.574	0.831	0.564	-0.478	-0.343	0.0392	1	0.824	1	0.0858	0.932	0.769	1	1	0.942
TR12134|c0_g1_i7	AT4G17600.1 | Symbols: LIL3:1 | Chlorophyll A-B binding family protein | chr4:9803759-9804714 FORWARD LENGTH=262	1.45	0.296	0.195	0.0419	0.916	0.625	0.34	0.212	-0.279	0.352	0.0951	1	0.943	1	0.0256	0.698	0.795	1	1	0.756
TR12145|c1_g1_i4	AT1G60710.1 | Symbols: ATB2 | NAD(P)-linked oxidoreductase superfamily protein | chr1:22355073-22356627 REVERSE LENGTH=345	3.41	1.17	1.16	0.309	0.779	4.4	1.59	1.16	0.465	1.18	0.00014	0.15	0.157	1	0.189	3.66e-08	0.00134	0.161	0.986	0.0598
TR12145|c1_g1_i5	AT1G60710.1 | Symbols: ATB2 | NAD(P)-linked oxidoreductase superfamily protein | chr1:22355073-22356627 REVERSE LENGTH=345	4.1	1.39	1.28	0.316	1.11	4.46	1.44	1.05	0.432	1.54	6.15e-05	0.122	0.193	1	0.0861	3.76e-06	0.0335	0.499	1	0.0189
TR12151|c1_g2_i1	AT1G03080.1 | Symbols: | kinase interacting (KIP1-like) family protein | chr1:731794-737332 REVERSE LENGTH=1733	-3.72	-1.16	-1.25	-0.218	-1.1	-2.01	-0.413	-0.0736	-0.639	-0.884	0.026	0.701	0.525	1	0.327	0.404	0.905	1	1	0.645
TR12179|c0_g1_i3	AT3G50690.1 | Symbols: | Leucine-rich repeat (LRR) family protein | chr3:18835271-18837097 REVERSE LENGTH=447	-2.94	-0.582	-0.351	-0.859	-1.15	-0.942	-0.169	0.465	-0.402	-0.836	0.0364	1	0.938	0.794	0.166	0.73	0.968	1	1	0.58
TR12179|c0_g1_i4	AT3G50690.1 | Symbols: | Leucine-rich repeat (LRR) family protein | chr3:18835271-18837097 REVERSE LENGTH=447	-2.31	-0.136	-0.722	-0.548	-0.907	-0.903	-0.276	0.244	-0.351	-0.52	0.0147	1	0.531	0.865	0.115	0.577	0.878	1	1	0.657
TR12184|c0_g2_i1	AT3G15030.3 | Symbols: TCP4 | TCP family transcription factor 4 | chr3:5062308-5063570 FORWARD LENGTH=420	-1.07	0.0447	-0.271	-0.118	-0.725	-0.361	-0.0724	-0.14	-0.13	-0.0191	0.163	1	0.858	1	0.0436	0.818	0.976	1	1	0.998
TR12199|c0_g4_i10	AT5G13740.1 | Symbols: ZIF1 | zinc induced facilitator 1 | chr5:4432689-4436483 FORWARD LENGTH=486	3.11	0.632	1.15	0.701	0.631	4.39	0.843	0.562	1.14	1.85	0.0975	1	0.678	1	0.599	0.0161	0.745	1	0.78	0.147
TR12199|c0_g4_i3	AT5G13750.1 | Symbols: ZIFL1 | zinc induced facilitator-like 1 | chr5:4438318-4441289 FORWARD LENGTH=478	2.52	0.969	0.658	0.831	0.064	4.13	0.404	1.26	1.33	1.14	0.199	0.882	0.873	0.983	0.976	0.0244	0.923	0.828	0.633	0.539
TR12199|c0_g4_i4	AT5G13750.1 | Symbols: ZIFL1 | zinc induced facilitator-like 1 | chr5:4438318-4441289 FORWARD LENGTH=478	4.59	0.713	1.85	1	1.02	4.66	0.894	1.3	1.53	0.937	0.00153	0.977	0.193	0.826	0.249	0.00105	0.632	0.643	0.332	0.602
TR12199|c0_g4_i8	AT5G13750.2 | Symbols: ZIFL1 | zinc induced facilitator-like 1 | chr5:4438896-4441289 FORWARD LENGTH=392	7.33	2.63	2.65	1.27	0.771	4.22	1.14	0.986	0.841	1.25	0.00143	0.237	0.202	0.956	0.674	0.134	0.724	1	1	0.646
TR12199|c0_g4_i9	AT5G13750.2 | Symbols: ZIFL1 | zinc induced facilitator-like 1 | chr5:4438896-4441289 FORWARD LENGTH=392	3.98	1.04	0.896	1.89	0.161	4.5	1.5	0.741	1.19	1.08	0.0524	0.893	0.825	0.484	0.933	0.0345	0.404	1	0.839	0.645
TR12212|c4_g1_i7	AT5G54160.1 | Symbols: ATOMT1, OMT1 | O-methyltransferase 1 | chr5:21982075-21984167 FORWARD LENGTH=363	2.32	0.368	0.726	0.318	0.905	0.667	0.288	0.0438	0.56	-0.224	0.0387	1	0.643	1	0.137	0.79	0.914	1	0.949	0.928
TR12215|c1_g1_i6	AT1G66520.1 | Symbols: pde194 | formyltransferase, putative | chr1:24816330-24818693 REVERSE LENGTH=355	-9.24	-0.556	-1.41	-0.794	-6.48	0.919	-0.736	-0.636	0.931	1.36	0.00418	1	0.718	1	0.0104	0.894	0.886	1	1	0.732
TR12219|c1_g1_i3	No informative hit E<10-6	-2.04	-0.268	0.263	-0.288	-1.75	0.159	0.388	0.356	-0.558	-0.027	0.25	1	0.965	1	0.0471	0.981	0.905	1	0.999	1
TR12247|c3_g2_i5	AT1G09340.1 | Symbols: CRB, CSP41B, HIP1.3 | chloroplast RNA binding | chr1:3015473-3018035 FORWARD LENGTH=378	-2.1	-0.404	-0.555	0.347	-1.49	-0.283	-0.168	0.465	-0.35	-0.229	0.165	1	0.848	1	0.034	0.951	0.97	1	1	0.946
TR12249|c2_g3_i2	AT3G10300.3 | Symbols: | Calcium-binding EF-hand family protein | chr3:3186436-3188071 FORWARD LENGTH=335	-3.42	-0.296	-0.956	-1.14	-1.03	-1.52	-0.269	-0.115	-1.18	0.0467	0.0202	1	0.648	0.617	0.232	0.552	0.948	1	0.575	0.997
TR12249|c2_g3_i3	No informative hit E<10-6	-3.61	-0.591	-1.23	0.00816	-1.8	-2.52	-0.028	-0.626	-1.06	-0.805	0.0387	1	0.568	1	0.054	0.313	1	1	0.826	0.745
TR12249|c2_g3_i4	AT3G10300.4 | Symbols: | Calcium-binding EF-hand family protein | chr3:3186436-3188075 FORWARD LENGTH=334	-3.08	-0.289	-1.24	-0.753	-0.805	-2.79	-0.795	-0.264	-1.23	-0.5	0.0226	1	0.366	0.904	0.325	0.0652	0.623	1	0.419	0.822
TR12264|c0_g1_i3	AT3G54500.1 | Symbols: | BEST Arabidopsis thaliana protein match is: dentin sialophosphoprotein-related (TAIR:AT5G64170.1); Has 183 Blast hits to 175 proteins in 44 species: Archae - 0; Bacteria - 4; Metazoa - 38; Fungi - 11; Plants - 120; Viruses - 0; Other Eukaryotes - 10 (source: NCBI BLink). | chr3:20175792-20178737 REVERSE LENGTH=648	-1.9	0.21	-0.926	0.146	-1.33	-0.584	0.0556	-0.131	-0.318	-0.19	0.333	1	0.586	1	0.0475	0.88	0.993	1	1	0.951
TR12264|c0_g2_i2	AT3G54500.2 | Symbols: | BEST Arabidopsis thaliana protein match is: dentin sialophosphoprotein-related (TAIR:AT5G64170.1); Has 162 Blast hits to 160 proteins in 41 species: Archae - 0; Bacteria - 0; Metazoa - 23; Fungi - 11; Plants - 118; Viruses - 0; Other Eukaryotes - 10 (source: NCBI BLink). | chr3:20175792-20178275 REVERSE LENGTH=569	-0.618	0.0138	-0.503	0.889	-1.02	0.224	0.189	-0.186	0.2	0.0207	0.695	1	0.746	0.68	0.0328	0.946	0.939	1	1	1
TR12268|c0_g2_i6	AT3G57040.1 | Symbols: ARR9, ATRR4 | response regulator 9 | chr3:21110059-21111228 FORWARD LENGTH=234	-2.62	-0.284	0.212	0.195	-2.74	0.862	-0.445	-0.104	-0.168	1.58	0.202	1	0.979	1	0.0107	0.851	0.922	1	1	0.391
TR12271|c0_g2_i6	AT3G20640.1 | Symbols: | basic helix-loop-helix (bHLH) DNA-binding superfamily protein | chr3:7210654-7213199 REVERSE LENGTH=454	-2.22	-0.39	-0.481	-0.183	-1.17	-1.28	-0.102	0.345	-0.38	-1.14	0.0317	1	0.803	1	0.0452	0.41	0.977	1	1	0.0588
TR12281|c2_g1_i3	AT5G05140.1 | Symbols: | Transcription elongation factor (TFIIS) family protein | chr5:1520353-1522297 FORWARD LENGTH=436	0.0416	-0.394	0.495	0.0885	-0.148	2.6	1.27	0.43	-0.821	1.73	1	1	0.89	1	0.913	0.144	0.229	1	0.832	0.0332
TR12281|c2_g1_i7	AT5G05140.1 | Symbols: | Transcription elongation factor (TFIIS) family protein | chr5:1520353-1522297 FORWARD LENGTH=436	0.715	0.2	0.0471	0.127	0.341	1.23	0.801	-0.0105	-0.49	0.932	0.505	1	0.995	1	0.525	0.268	0.14	1	0.81	0.0426
TR12296|c1_g1_i5	AT1G32100.1 | Symbols: ATPRR1, PRR1 | pinoresinol reductase 1 | chr1:11546472-11547953 REVERSE LENGTH=317	-0.321	0.145	-0.738	-0.358	0.629	7.75	2.03	2.01	0.997	2.71	0.962	1	0.92	1	0.74	0.000473	0.308	0.648	1	0.0985
TR12297|c2_g1_i13	No informative hit E<10-6	-16.5	-7.43	-1.76	-5.53	-1.73	-1.48	-1.18	0.385	0.449	-1.13	0.00171	0.173	0.898	0.407	0.617	0.92	0.919	1	1	0.906
TR12305|c1_g1_i1	AT1G34520.1 | Symbols: | MBOAT (membrane bound O-acyl transferase) family protein | chr1:12623477-12624487 FORWARD LENGTH=336	-0.662	0.04	-0.496	-0.334	0.129	-1.01	-0.0231	0.0933	0.2	-1.28	0.718	1	0.835	1	0.906	0.648	0.999	1	1	0.0478
TR12306|c1_g2_i4	No informative hit E<10-6	19.3	9.29	0	0	9.98	0.207	-0.169	0.0954	-0.326	0.607	1	0.0116	1	1	0.00241	1	0.995	1	1	0.957
TR12314|c3_g1_i5	No informative hit E<10-6	-5.38	-0.94	-0.104	-1.09	-3.24	-1.29	-0.618	0.41	-0.773	-0.309	0.0433	0.989	0.999	0.978	0.0446	0.807	0.888	1	1	0.956
TR12335|c4_g3_i1	AT3G27925.1 | Symbols: DEGP1, Deg1 | DegP protease 1 | chr3:10366659-10368864 REVERSE LENGTH=439	-1.46	-0.0545	-0.116	-0.322	-0.97	-0.11	0.133	0.26	-0.302	-0.201	0.113	1	0.977	1	0.0241	0.975	0.956	1	1	0.899
TR12364|c1_g1_i7	AT5G57060.2 | Symbols: | BEST Arabidopsis thaliana protein match is: Ribosomal protein L18ae family (TAIR:AT4G26060.1); Has 35333 Blast hits to 34131 proteins in 2444 species: Archae - 798; Bacteria - 22429; Metazoa - 974; Fungi - 991; Plants - 531; Viruses - 0; Other Eukaryotes - 9610 (source: NCBI BLink). | chr5:23091072-23091796 FORWARD LENGTH=110	2.29	0.357	0.352	0.871	0.71	1.35	0.333	-0.0601	0.377	0.703	0.033	1	0.903	0.479	0.243	0.42	0.876	1	1	0.523
TR12381|c0_g1_i1	AT5G64080.2 | Symbols: | Bifunctional inhibitor/lipid-transfer protein/seed storage 2S albumin superfamily protein | chr5:25645475-25646638 REVERSE LENGTH=178	-1.65	0.536	-0.131	-0.562	-1.49	0.798	0.639	0.757	-0.479	-0.119	0.298	1	0.986	1	0.0316	0.774	0.706	0.908	1	0.977
TR12389|c0_g2_i2	AT2G35820.1 | Symbols: | ureidoglycolate hydrolases | chr2:15050933-15052004 FORWARD LENGTH=192	2.35	-0.132	1.57	0.876	0.0329	1.73	0.478	1.1	0.0704	0.077	0.00798	1	0.00164	0.338	0.977	0.111	0.692	0.105	1	0.98
TR12398|c12_g1_i1	AT3G04720.1 | Symbols: PR4, HEL, PR-4 | pathogenesis-related 4 | chr3:1285691-1286531 REVERSE LENGTH=212	2.73	0.562	0.358	1.64	0.163	4.03	1.8	0.419	1.6	0.212	0.0179	0.984	0.913	0.032	0.873	2.57e-05	0.00126	1	0.0314	0.94
TR12403|c5_g1_i1	No informative hit E<10-6	0.966	-0.227	0.0608	-0.143	1.27	-1.21	-0.479	0.0354	-0.396	-0.371	0.534	1	0.996	1	0.0377	0.528	0.791	1	1	0.862
TR12414|c6_g1_i1	No informative hit E<10-6	-6.23	-3.81	-0.446	-0.355	-1.61	-3.25	-0.0967	-0.528	-0.21	-2.42	0.0474	0.0793	0.974	1	0.394	0.495	0.997	1	1	0.326
TR12414|c6_g1_i3	No informative hit E<10-6	-6.54	-4.04	-0.861	-0.775	-0.859	-6.6	-0.0416	-0.62	-0.476	-5.46	0.149	0.279	0.952	1	0.78	0.183	1	1	1	0.0435
TR12420|c4_g2_i1	AT4G23160.1 | Symbols: CRK8 | cysteine-rich RLK (RECEPTOR-like protein kinase) 8 | chr4:12129485-12134086 FORWARD LENGTH=1262	-3.6	-0.487	-0.363	-1.19	-1.56	-0.272	-0.386	-0.0379	-0.182	0.334	0.000294	1	0.905	0.177	0.00855	0.939	0.858	1	1	0.869
TR12420|c4_g2_i2	AT4G23160.1 | Symbols: CRK8 | cysteine-rich RLK (RECEPTOR-like protein kinase) 8 | chr4:12129485-12134086 FORWARD LENGTH=1262	-2.01	-0.272	0.283	-0.141	-1.88	1.1	0.65	0.112	0.32	0.0134	0.291	1	0.969	1	0.0247	0.732	0.844	1	1	1
TR12427|c4_g3_i1	AT1G80130.1 | Symbols: | Tetratricopeptide repeat (TPR)-like superfamily protein | chr1:30141250-30142478 REVERSE LENGTH=305	-1.33	0.19	-0.352	-0.192	-0.975	-2.72	-0.115	-0.547	-0.558	-1.5	0.296	1	0.896	1	0.0886	0.00618	0.975	0.965	0.931	0.0036
TR12430|c3_g4_i6	AT3G14460.1 | Symbols: | LRR and NB-ARC domains-containing disease resistance protein | chr3:4851990-4856264 REVERSE LENGTH=1424	4.27	0.765	2.57	0.636	0.307	-0.247	-2.01	2.44	-0.338	-0.335	0.103	1	0.0417	1	0.909	0.963	0.597	0.0742	1	0.967
TR12430|c3_g4_i8	AT5G46270.1 | Symbols: | Disease resistance protein (TIR-NBS-LRR class) family | chr5:18764833-18769090 REVERSE LENGTH=1139	4.36	1.26	1.79	0.208	1.1	0.892	-0.669	1.13	-0.229	0.66	0.0302	0.942	0.149	1	0.451	0.878	0.91	0.739	1	0.884
TR12431|c3_g3_i2	AT1G48120.1 | Symbols: | hydrolases;protein serine/threonine phosphatases | chr1:17774238-17779624 REVERSE LENGTH=1340	-1.27	-0.251	-0.753	0.597	-0.865	2.85	2.17	0.534	0.0713	0.079	0.469	1	0.73	0.992	0.277	0.0368	0.000311	1	1	0.989
TR12432|c1_g1_i3	No informative hit E<10-6	-3.87	-0.44	-2.22	-0.348	-0.87	-1.45	-0.109	0.0608	-0.184	-1.22	0.00911	1	0.0382	1	0.431	0.527	0.983	1	1	0.311
TR12433|c2_g1_i1	AT3G61780.1 | Symbols: emb1703 | embryo defective 1703 | chr3:22867814-22871462 REVERSE LENGTH=1121	-9.53	-1.87	-2.09	-1.59	-3.98	0.207	0.279	-0.273	-0.919	1.12	0.0126	0.836	0.549	0.894	0.277	0.989	0.978	1	1	0.862
TR12436|c1_g1_i2	AT1G33520.1 | Symbols: MOS2 | D111/G-patch domain-containing protein | chr1:12157488-12158876 REVERSE LENGTH=462	-3.22	-0.328	-0.434	-0.0847	-2.37	-0.862	-0.353	0.0511	0.0576	-0.617	0.0192	1	0.9	1	0.00172	0.743	0.894	1	1	0.717
TR12437|c1_g1_i1	AT1G17840.1 | Symbols: WBC11, ABCG11, DSO, COF1, ATWBC11 | white-brown complex homolog protein 11 | chr1:6142870-6145894 FORWARD LENGTH=703	3.14	0.55	0.862	0.856	0.869	-0.754	-0.452	-0.705	0.23	0.173	0.0145	1	0.627	0.77	0.279	0.798	0.851	0.94	1	0.962
TR12437|c2_g2_i1	AT3G56150.2 | Symbols: EIF3C | eukaryotic translation initiation factor 3C | chr3:20833790-20836820 REVERSE LENGTH=900	-2.65	-0.435	-0.918	-0.442	-0.854	-0.896	-0.591	0.468	-0.27	-0.504	0.01	1	0.406	1	0.165	0.656	0.642	1	1	0.726
TR12437|c2_g4_i1	AT3G56150.2 | Symbols: EIF3C | eukaryotic translation initiation factor 3C | chr3:20833790-20836820 REVERSE LENGTH=900	-0.977	-0.117	-0.219	0.165	-0.805	-0.551	-0.522	0.205	-0.00685	-0.227	0.195	1	0.895	1	0.027	0.658	0.313	1	1	0.846
TR12439|c0_g6_i5	No informative hit E<10-6	2.46	0.728	0.543	-0.151	1.34	0.261	0.464	-1.03	0.0323	0.79	0.0378	0.861	0.806	1	0.0248	0.947	0.812	0.495	1	0.482
TR12450|c3_g2_i1	AT1G26470.1 | Symbols: | FUNCTIONS IN: molecular_function unknown; INVOLVED IN: regulation of transcription; LOCATED IN: nucleus, H4/H2A histone acetyltransferase complex; EXPRESSED IN: 23 plant structures; EXPRESSED DURING: 15 growth stages; CONTAINS InterPro DOMAIN/s: CT20 (InterPro:IPR012423); Has 60 Blast hits to 60 proteins in 27 species: Archae - 0; Bacteria - 0; Metazoa - 26; Fungi - 2; Pl…	0.8	0.0688	-0.0136	-0.321	1.07	-0.552	-0.236	-0.283	0.0422	-0.0755	0.504	1	1	1	0.0229	0.773	0.904	1	1	0.98
TR12456|c3_g2_i11	AT3G14470.1 | Symbols: | NB-ARC domain-containing disease resistance protein | chr3:4857940-4861104 FORWARD LENGTH=1054	0.626	0.567	0.283	0.0426	-0.266	-1.97	-2.19	0.315	0.338	-0.429	0.827	1	0.961	1	0.871	0.465	0.0102	1	1	0.916
TR12456|c3_g2_i12	AT3G14460.1 | Symbols: | LRR and NB-ARC domains-containing disease resistance protein | chr3:4851990-4856264 REVERSE LENGTH=1424	0.643	0.783	-0.152	0.046	-0.0337	-5.87	-3.56	-0.696	0.42	-2.04	0.891	1	0.994	1	0.996	0.0946	0.00828	1	1	0.712
TR12456|c3_g2_i5	AT3G14470.1 | Symbols: | NB-ARC domain-containing disease resistance protein | chr3:4857940-4861104 FORWARD LENGTH=1054	-0.0695	0.438	-0.188	-0.287	-0.0332	-3.06	-1.96	-0.351	0.075	-0.828	1	1	0.981	1	0.991	0.139	0.042	1	1	0.755
TR12460|c1_g2_i6	AT4G21430.1 | Symbols: B160 | Zinc finger, RING-type;Transcription factor jumonji/aspartyl beta-hydroxylase | chr4:11407835-11412159 REVERSE LENGTH=927	-2.9	-0.531	-0.994	-0.637	-0.733	-1.66	-0.528	-0.0786	-0.297	-0.755	0.0262	0.999	0.503	0.943	0.437	0.348	0.76	1	1	0.597
TR12463|c4_g3_i1	No informative hit E<10-6	-2.39	-0.366	-0.823	-1.13	-0.0654	4.55	-0.644	1.09	0.0166	4.09	0.295	1	0.833	0.863	0.977	0.0156	0.857	0.911	1	1.73e-06
TR12476|c3_g2_i1	AT1G68740.1 | Symbols: PHO1;H1 | EXS (ERD1/XPR1/SYG1) family protein | chr1:25812735-25816574 REVERSE LENGTH=784	-4.55	-0.275	-1.39	-1.18	-1.71	-1.8	-0.418	0.344	-1.11	-0.617	3.9e-05	1	0.202	0.458	0.00694	0.389	0.873	1	0.684	0.716
TR12476|c3_g2_i3	AT1G68740.1 | Symbols: PHO1;H1 | EXS (ERD1/XPR1/SYG1) family protein | chr1:25812735-25816574 REVERSE LENGTH=784	-5.7	-0.707	-1.78	-1.52	-1.69	-1.84	-0.131	0.0823	-0.841	-0.953	8.33e-08	0.938	0.0561	0.19	0.00964	0.389	0.979	1	0.936	0.417
TR12478|c4_g1_i1	No informative hit E<10-6	-1.66	-3.23	4.08	5.26	-7.77	0.969	-1.85	-3.14	1.8	4.16	1	0.944	0.526	0.463	0.0352	1	0.838	0.944	1	0.527
TR12478|c4_g1_i2	No informative hit E<10-6	7.97	-0.383	5.39	6.02	-3.06	3.52	-1.23	1.2	1.42	2.14	0.0606	1	0.103	0.0475	0.194	0.643	0.874	1	1	0.723
TR12479|c4_g1_i3	AT3G14460.1 | Symbols: | LRR and NB-ARC domains-containing disease resistance protein | chr3:4851990-4856264 REVERSE LENGTH=1424	-3.75	-0.396	-0.949	-0.6	-1.8	0.997	0.0759	-0.00815	-0.28	1.21	0.0409	1	0.735	1	0.113	0.783	0.993	1	1	0.497
TR12486|c2_g2_i1	AT1G78580.1 | Symbols: ATTPS1, TPS1 | trehalose-6-phosphate synthase | chr1:29552495-29557482 REVERSE LENGTH=942	-4.81	-0.24	-1.71	-0.578	-2.28	-1.43	-0.342	0.423	-0.583	-0.925	8.33e-08	1	0.011	0.916	4.96e-05	0.384	0.868	1	0.927	0.277
TR12489|c2_g1_i2	AT3G14470.1 | Symbols: | NB-ARC domain-containing disease resistance protein | chr3:4857940-4861104 FORWARD LENGTH=1054	14.8	7.05	3.49	-1.03	5.32	-0.868	-0.499	-0.529	-0.428	0.588	0.000433	0.000461	0.643	1	0.0515	0.882	0.928	1	1	0.89
TR12514|c3_g1_i3	AT2G46690.1 | Symbols: | SAUR-like auxin-responsive protein family | chr2:19180904-19181269 FORWARD LENGTH=121	-4.34	-2.36	-0.151	-1.18	-0.642	0.917	0.821	-0.276	0.52	-0.149	0.0449	0.206	0.993	0.906	0.663	0.862	0.812	1	1	0.983
TR12520|c1_g2_i3	AT5G62360.1 | Symbols: | Plant invertase/pectin methylesterase inhibitor superfamily protein | chr5:25040699-25041310 FORWARD LENGTH=203	-4.16	-1.28	-0.127	-0.353	-2.4	0.882	-0.461	0.225	-0.848	1.97	0.026	0.741	0.987	1	0.0955	0.817	0.912	1	0.793	0.158
TR12522|c0_g1_i5	AT1G12663.1 | Symbols: | Predicted to encode a PR (pathogenesis-related) protein. Belongs to the plant thionin (PR-13) family with the following members: At1g66100, At5g36910, At1g72260, At2g15010, At1g12663, At1g12660. | chr1:4310969-4311457 FORWARD LENGTH=115	-3.03	-0.875	-0.269	-0.366	-1.52	-3.18	-0.954	-0.644	0.105	-1.69	0.0328	0.829	0.955	1	0.0807	0.0146	0.41	0.971	1	0.0291
TR12538|c1_g1_i1	AT2G23190.1 | Symbols: CYP81D7 | cytochrome P450, family 81, subfamily D, polypeptide 7 | chr2:9877058-9879007 FORWARD LENGTH=543	-0.128	-0.568	0.642	-0.175	-0.0269	-3.3	-0.901	-0.82	-0.31	-1.27	0.977	1	0.795	1	0.991	0.00619	0.456	0.858	1	0.172
TR12538|c1_g1_i3	AT2G23190.1 | Symbols: CYP81D7 | cytochrome P450, family 81, subfamily D, polypeptide 7 | chr2:9877058-9879007 FORWARD LENGTH=543	-1.09	-0.401	-0.0439	-0.356	-0.287	-3.3	-0.0428	-0.682	-0.615	-1.96	0.66	1	1	1	0.866	0.0515	0.997	1	0.992	0.0442
TR12544|c1_g1_i2	AT4G33650.1 | Symbols: ADL2, DRP3A | dynamin-related protein 3A | chr4:16161073-16166587 FORWARD LENGTH=808	2.42	0.644	0.8	-0.0516	1.02	0.346	0.187	-0.155	-0.127	0.442	0.0374	0.932	0.6	1	0.0863	0.921	0.957	1	1	0.799
TR12572|c0_g2_i4	AT4G25810.1 | Symbols: XTR6, XTH23 | xyloglucan endotransglycosylase 6 | chr4:13128694-13129715 FORWARD LENGTH=286	1.49	0.958	0.503	0.353	-0.324	3.14	-0.412	1.34	0.314	1.9	0.452	0.83	0.903	1	0.784	0.0758	0.904	0.589	1	0.0285
TR12573|c6_g3_i3	No informative hit E<10-6	1.87	0.166	0.369	0.13	1.21	-0.496	-0.286	0.0847	-0.325	0.0297	0.0584	1	0.862	1	0.0111	0.824	0.886	1	1	0.997
TR12590|c0_g1_i2	AT4G14920.1 | Symbols: | Acyl-CoA N-acyltransferase with RING/FYVE/PHD-type zinc finger protein | chr4:8531157-8535842 REVERSE LENGTH=1138	-3.17	-0.313	-1.62	-0.539	-0.698	-0.454	-0.326	0.108	-0.0429	-0.193	0.0432	1	0.179	1	0.57	0.911	0.918	1	1	0.963
TR12685|c1_g2_i1	AT1G49730.2 | Symbols: | Protein kinase superfamily protein | chr1:18403515-18405548 REVERSE LENGTH=450	-1.5	0.0344	-0.228	0.123	-1.43	-0.724	-0.592	0.436	-0.378	-0.19	0.298	1	0.961	1	0.0348	0.778	0.723	1	1	0.951
TR12709|c2_g2_i3	AT3G57650.1 | Symbols: LPAT2 | lysophosphatidyl acyltransferase 2 | chr3:21349751-21352839 FORWARD LENGTH=389	-2.62	-0.617	-0.324	-0.698	-0.981	0.0901	-0.303	0.0904	0.211	0.0918	0.0198	0.939	0.92	0.807	0.133	0.991	0.903	1	1	0.981
TR12714|c1_g1_i1	AT5G40740.1 | Symbols: | unknown protein; Has 30201 Blast hits to 17322 proteins in 780 species: Archae - 12; Bacteria - 1396; Metazoa - 17338; Fungi - 3422; Plants - 5037; Viruses - 0; Other Eukaryotes - 2996 (source: NCBI BLink). | chr5:16302229-16306371 REVERSE LENGTH=741	-4.54	-1.3	-1.04	-0.595	-1.62	-1.53	-1.12	-0.551	-0.0534	0.197	0.00233	0.534	0.636	1	0.112	0.525	0.26	1	1	0.962
TR12714|c1_g1_i10	AT5G40740.1 | Symbols: | unknown protein; Has 30201 Blast hits to 17322 proteins in 780 species: Archae - 12; Bacteria - 1396; Metazoa - 17338; Fungi - 3422; Plants - 5037; Viruses - 0; Other Eukaryotes - 2996 (source: NCBI BLink). | chr5:16302229-16306371 REVERSE LENGTH=741	-3.42	-0.979	-1.2	-0.0379	-1.21	-0.752	-0.47	0.0242	-0.388	0.0823	0.0151	0.701	0.43	1	0.193	0.804	0.827	1	1	0.99
TR12714|c1_g1_i12	AT5G40740.1 | Symbols: | unknown protein; Has 30201 Blast hits to 17322 proteins in 780 species: Archae - 12; Bacteria - 1396; Metazoa - 17338; Fungi - 3422; Plants - 5037; Viruses - 0; Other Eukaryotes - 2996 (source: NCBI BLink). | chr5:16302229-16306371 REVERSE LENGTH=741	-3	-0.733	-0.46	-0.173	-1.63	-0.772	-0.266	-0.213	-0.232	-0.0611	0.00936	0.83	0.857	1	0.0199	0.715	0.915	1	1	0.99
TR12723|c1_g1_i3	AT2G03820.1 | Symbols: | nonsense-mediated mRNA decay NMD3 family protein | chr2:1165149-1166699 REVERSE LENGTH=516	-2.34	-0.888	-0.244	-0.382	-0.826	-0.648	-0.389	0.153	-0.0917	-0.32	0.00692	0.289	0.926	1	0.123	0.72	0.768	1	1	0.846
TR12723|c1_g1_i4	AT2G03820.1 | Symbols: | nonsense-mediated mRNA decay NMD3 family protein | chr2:1165149-1166699 REVERSE LENGTH=516	-1.52	-0.378	-0.0763	-0.0588	-1.01	-0.877	-0.557	0.0118	-0.12	-0.212	0.07	0.972	0.986	1	0.0255	0.472	0.379	1	1	0.892
TR12723|c1_g1_i5	AT2G03820.1 | Symbols: | nonsense-mediated mRNA decay NMD3 family protein | chr2:1165149-1166699 REVERSE LENGTH=516	-1.92	-0.48	-0.407	0.266	-1.3	-0.571	-0.35	0.0875	-0.0542	-0.254	0.0546	0.938	0.81	1	0.0234	0.779	0.811	1	1	0.9
TR12724|c0_g1_i7	AT3G07800.1 | Symbols: | Thymidine kinase | chr3:2489944-2490935 REVERSE LENGTH=238	-3.1	-0.782	-0.346	-0.0411	-1.94	-0.316	0.112	-0.0117	-0.302	-0.114	0.0447	0.902	0.925	1	0.062	0.939	0.979	1	1	0.982
TR12731|c1_g1_i2	No informative hit E<10-6	-4.77	-1.92	-0.513	-3.42	1.08	-2.74	-0.823	-1.1	-0.281	-0.542	0.0503	0.648	0.945	0.0371	0.484	0.428	0.833	0.971	1	0.907
TR12731|c1_g1_i3	AT3G57980.1 | Symbols: | DNA-binding bromodomain-containing protein | chr3:21466919-21469148 REVERSE LENGTH=632	-1.57	-0.366	-0.533	0.045	-0.714	-1.69	-0.948	0.0411	-0.264	-0.514	0.0528	0.978	0.527	1	0.176	0.031	0.0186	1	1	0.564
TR12734|c0_g1_i4	AT1G06150.2 | Symbols: | basic helix-loop-helix (bHLH) DNA-binding superfamily protein | chr1:1869228-1873194 REVERSE LENGTH=734	-2.53	0.37	-0.765	-0.15	-1.99	-0.996	-0.0165	-0.132	-0.454	-0.394	0.0805	1	0.726	1	0.00612	0.706	1	1	1	0.872
TR12735|c2_g1_i2	AT2G29570.1 | Symbols: PCNA2, ATPCNA2 | proliferating cell nuclear antigen 2 | chr2:12650139-12651598 REVERSE LENGTH=264	-3.32	-0.266	-0.972	-0.525	-1.55	-0.351	-0.555	0.457	0.111	-0.363	0.0141	1	0.554	1	0.0485	0.934	0.79	1	1	0.892
TR12736|c0_g1_i7	AT1G79620.1 | Symbols: | Leucine-rich repeat protein kinase family protein | chr1:29957633-29962174 REVERSE LENGTH=971	3.67	0.431	0.537	-0.38	3.08	-0.53	0.14	-0.186	0.533	-1.02	0.199	1	0.952	1	0.0231	0.94	0.989	1	1	0.737
TR12736|c0_g1_i8	AT1G79620.1 | Symbols: | Leucine-rich repeat protein kinase family protein | chr1:29957633-29962174 REVERSE LENGTH=971	2.23	-0.0432	0.0184	-0.131	2.39	-1.35	-0.0457	-0.501	0.222	-1.03	0.436	1	1	1	0.0389	0.744	0.998	1	1	0.674
TR12762|c4_g1_i1	AT5G41600.1 | Symbols: BTI3, RTNLB4 | VIRB2-interacting protein 3 | chr5:16636230-16637472 FORWARD LENGTH=257	-1.11	-0.203	0.0123	-0.0329	-0.886	-0.509	-0.159	0.0972	-0.193	-0.254	0.215	1	1	1	0.0427	0.749	0.935	1	1	0.852
TR13471|c2_g3_i4	AT2G39670.1 | Symbols: | Radical SAM superfamily protein | chr2:16534303-16536986 FORWARD LENGTH=428	1.23	-0.282	0.276	0.461	0.778	2.4	0.478	0.668	0.662	0.591	0.365	1	0.935	1	0.233	0.0335	0.778	0.869	0.822	0.656
TR13475|c0_g1_i8	AT2G38670.1 | Symbols: PECT1 | phosphorylethanolamine cytidylyltransferase 1 | chr2:16168979-16171680 FORWARD LENGTH=421	-2.41	-0.673	-0.138	-0.435	-1.17	-0.873	-0.121	-0.0519	-0.313	-0.386	0.0118	0.574	0.968	0.997	0.0788	0.606	0.963	1	1	0.801
TR13476|c2_g3_i1	AT5G53150.1 | Symbols: | DNAJ heat shock N-terminal domain-containing protein | chr5:21554935-21557202 FORWARD LENGTH=726	-1.87	-0.333	-0.241	-0.187	-1.11	0.182	-0.211	0.04	0.178	0.175	0.0407	1	0.923	1	0.0367	0.948	0.904	1	1	0.932
TR13486|c2_g1_i3	AT1G53400.1 | Symbols: | Ubiquitin domain-containing protein | chr1:19925009-19926400 FORWARD LENGTH=114	-2.96	-0.61	-0.22	-0.486	-1.64	-1.15	-0.572	-0.764	-0.00613	0.187	0.0488	1	0.968	1	0.0721	0.629	0.779	0.888	1	0.962
TR13487|c2_g2_i3	AT3G05250.1 | Symbols: | RING/U-box superfamily protein | chr3:1495635-1497387 FORWARD LENGTH=278	-2.07	0.124	-0.19	0.39	-2.39	-1.24	-0.874	-0.385	0.0128	0.00626	0.291	1	0.979	1	0.0245	0.654	0.562	1	1	1
TR13496|c0_g1_i3	AT1G23390.1 | Symbols: | Kelch repeat-containing F-box family protein | chr1:8309449-8310633 REVERSE LENGTH=394	2.61	0.657	0.112	0.734	1.1	2.58	-0.553	1.12	-0.00928	2.02	0.0646	0.973	0.99	0.932	0.153	0.106	0.811	0.521	1	0.00266
TR13496|c0_g1_i5	AT1G23390.1 | Symbols: | Kelch repeat-containing F-box family protein | chr1:8309449-8310633 REVERSE LENGTH=394	1.86	0.561	0.312	0.948	0.0383	4.59	0.479	0.759	0.448	2.91	0.383	1	0.962	0.904	0.988	0.00422	0.898	1	1	0.000529
TR13496|c0_g1_i7	AT1G23390.1 | Symbols: | Kelch repeat-containing F-box family protein | chr1:8309449-8310633 REVERSE LENGTH=394	3.33	0.88	-1.14	2.36	1.23	4.18	-0.78	1.18	-0.686	4.47	0.417	1	0.878	0.691	0.564	0.404	0.921	1	1	0.0318
TR13501|c1_g1_i3	AT5G11720.1 | Symbols: | Glycosyl hydrolases family 31 protein | chr5:3776840-3780025 FORWARD LENGTH=902	-0.581	-0.49	-0.619	-0.641	1.17	-4.79	-0.5	-0.617	-1.43	-2.24	0.89	1	0.918	1	0.343	0.0336	0.913	1	0.88	0.0915
TR13504|c4_g1_i3	AT4G16340.1 | Symbols: SPK1 | guanyl-nucleotide exchange factors;GTPase binding;GTP binding | chr4:9228773-9241060 REVERSE LENGTH=1830	-5.22	-1.14	-2.22	-1.39	-0.476	1.48	0.528	0.743	-0.255	0.468	0.0201	0.896	0.202	0.784	0.836	0.696	0.88	1	1	0.917
TR13506|c2_g6_i1	AT2G37040.1 | Symbols: PAL1, ATPAL1 | PHE ammonia lyase 1 | chr2:15557602-15560237 REVERSE LENGTH=725	1.85	0.383	1.07	0.0166	0.387	2.43	1.24	0.265	0.273	0.651	0.00943	0.957	0.0158	1	0.394	7.81e-05	0.00019	1	1	0.217
TR13516|c0_g1_i4	AT3G29280.1 | Symbols: | unknown protein; Has 24 Blast hits to 24 proteins in 9 species: Archae - 0; Bacteria - 0; Metazoa - 0; Fungi - 0; Plants - 24; Viruses - 0; Other Eukaryotes - 0 (source: NCBI BLink). | chr3:11236705-11237947 REVERSE LENGTH=178	0.88	-0.107	0.215	-0.109	0.881	-0.143	-0.0475	-0.319	0.0993	0.124	0.359	1	0.925	1	0.0257	0.959	0.99	1	1	0.949
TR13520|c1_g2_i3	AT1G80880.1 | Symbols: | Tetratricopeptide repeat (TPR)-like superfamily protein | chr1:30395194-30396921 REVERSE LENGTH=540	1.2	-0.36	0.204	0.664	0.69	1.34	2.17	-1.65	0.483	0.338	0.689	1	0.984	1	0.648	0.728	0.0488	0.449	1	0.947
TR13521|c2_g2_i1	AT3G21280.1 | Symbols: UBP7 | ubiquitin-specific protease 7 | chr3:7478166-7482037 REVERSE LENGTH=532	-1.81	-0.299	-0.226	-0.0322	-1.26	0.181	-0.223	0.122	0.262	0.02	0.0796	1	0.94	1	0.0303	0.956	0.916	1	1	1
TR13527|c1_g1_i1	AT2G22125.1 | Symbols: CSI1 | binding | chr2:9406793-9414223 FORWARD LENGTH=2150	-3.71	-0.621	-1.81	-0.258	-1.02	-1.97	-0.422	-0.00273	-0.681	-0.866	0.0216	1	0.168	1	0.307	0.43	0.907	1	0.998	0.649
TR13537|c1_g2_i2	AT3G13120.2 | Symbols: | Ribosomal protein S10p/S20e family protein | chr3:4220310-4221526 REVERSE LENGTH=191	2.7	0.72	0.578	0.603	0.797	1.31	0.458	0.102	0.471	0.279	0.00221	0.687	0.689	0.802	0.13	0.357	0.741	1	0.954	0.876
TR13539|c1_g2_i1	No informative hit E<10-6	1.03	0.945	-0.486	-0.376	0.951	2.22	1.71	0.306	0.0465	0.151	0.601	0.704	0.873	1	0.19	0.209	0.0108	1	1	0.967
TR13539|c1_g2_i2	No informative hit E<10-6	1.76	0.68	-0.12	0.429	0.772	2.71	1.63	0.367	0.309	0.411	0.197	0.901	0.986	1	0.25	0.0257	0.00526	1	1	0.829
TR13539|c1_g2_i3	No informative hit E<10-6	1.55	1.06	-0.125	-0.297	0.919	3.05	1.72	0.374	0.792	0.163	0.362	0.563	0.987	1	0.208	0.0293	0.01	1	0.946	0.963
TR13539|c1_g2_i4	No informative hit E<10-6	0.67	0.72	-0.757	0.104	0.603	1.92	1.3	0.782	-0.182	0.0249	0.668	0.646	0.495	1	0.267	0.108	0.00515	0.578	1	0.998
TR13543|c1_g2_i1	AT5G47830.1 | Symbols: | unknown protein; Has 35333 Blast hits to 34131 proteins in 2444 species: Archae - 798; Bacteria - 22429; Metazoa - 974; Fungi - 991; Plants - 531; Viruses - 0; Other Eukaryotes - 9610 (source: NCBI BLink). | chr5:19373013-19374300 REVERSE LENGTH=173	1.72	0.431	0.326	-0.177	1.14	1.89	0.866	-0.239	0.285	0.983	0.104	1	0.9	1	0.0163	0.0903	0.213	1	1	0.0862
TR13544|c1_g2_i2	AT2G19130.1 | Symbols: | S-locus lectin protein kinase family protein | chr2:8293789-8296275 FORWARD LENGTH=828	1.51	-0.983	0.89	-0.414	2.02	-1.5	-1.01	-1.07	0.553	0.0277	0.483	0.892	0.659	1	0.0271	0.501	0.453	0.579	0.986	1
TR13546|c0_g2_i2	AT1G54730.2 | Symbols: | Major facilitator superfamily protein | chr1:20424471-20429978 FORWARD LENGTH=470	1.76	0.597	-0.124	-0.828	2.12	-0.842	-0.332	0.138	0.0611	-0.71	0.485	1	0.994	1	0.0301	0.859	0.95	1	1	0.801
TR13546|c1_g1_i10	AT1G08920.3 | Symbols: ESL1 | ERD (early response to dehydration) six-like 1 | chr1:2867446-2870190 FORWARD LENGTH=449	3.4	0.209	-0.457	1.02	2.64	0.923	0.827	-0.0646	-0.436	0.597	0.243	1	0.965	1	0.036	0.893	0.853	1	1	0.91
TR13550|c3_g1_i6	No informative hit E<10-6	0.514	0.184	0.731	0.329	-0.731	-6.82	-3.09	-1.02	-0.741	-1.97	0.929	1	0.925	1	0.697	0.00516	0.0548	1	1	0.391
TR13556|c0_g1_i2	No informative hit E<10-6	-3.84	-0.261	-0.886	0.346	-3.03	-0.263	0.714	0.0443	-0.489	-0.532	0.0618	1	0.719	1	0.03	0.96	0.706	1	1	0.849
TR13559|c2_g2_i1	AT1G57680.2 | Symbols: | FUNCTIONS IN: molecular_function unknown; INVOLVED IN: biological_process unknown; LOCATED IN: endomembrane system; EXPRESSED IN: 24 plant structures; EXPRESSED DURING: 15 growth stages; CONTAINS InterPro DOMAIN/s: Uncharacterised conserved protein UCP031277 (InterPro:IPR016971); Has 35333 Blast hits to 34131 proteins in 2444 species: Archae - 798; Bacteria - 22429; Metaz…	-1.56	0.165	0.0818	-0.961	-0.842	-1.29	-1.43	0.33	-0.185	-0.00461	0.0704	1	0.986	0.122	0.0516	0.244	6.19e-05	1	1	1
TR13559|c2_g2_i2	AT1G57680.2 | Symbols: | FUNCTIONS IN: molecular_function unknown; INVOLVED IN: biological_process unknown; LOCATED IN: endomembrane system; EXPRESSED IN: 24 plant structures; EXPRESSED DURING: 15 growth stages; CONTAINS InterPro DOMAIN/s: Uncharacterised conserved protein UCP031277 (InterPro:IPR016971); Has 35333 Blast hits to 34131 proteins in 2444 species: Archae - 798; Bacteria - 22429; Metaz…	-0.925	0.118	0.0585	-0.687	-0.415	-1.14	-1.2	0.101	-0.103	0.0592	0.352	1	0.993	0.463	0.411	0.33	0.00183	1	1	0.983
TR13559|c2_g2_i3	AT1G57680.2 | Symbols: | FUNCTIONS IN: molecular_function unknown; INVOLVED IN: biological_process unknown; LOCATED IN: endomembrane system; EXPRESSED IN: 24 plant structures; EXPRESSED DURING: 15 growth stages; CONTAINS InterPro DOMAIN/s: Uncharacterised conserved protein UCP031277 (InterPro:IPR016971); Has 35333 Blast hits to 34131 proteins in 2444 species: Archae - 798; Bacteria - 22429; Metaz…	-0.741	0.173	0.345	-0.637	-0.622	-1.13	-1.21	0.256	-0.149	-0.0295	0.486	1	0.835	0.536	0.169	0.332	0.00143	1	1	0.995
TR13559|c2_g2_i5	AT1G57680.2 | Symbols: | FUNCTIONS IN: molecular_function unknown; INVOLVED IN: biological_process unknown; LOCATED IN: endomembrane system; EXPRESSED IN: 24 plant structures; EXPRESSED DURING: 15 growth stages; CONTAINS InterPro DOMAIN/s: Uncharacterised conserved protein UCP031277 (InterPro:IPR016971); Has 35333 Blast hits to 34131 proteins in 2444 species: Archae - 798; Bacteria - 22429; Metaz…	-0.997	0.207	0.218	-0.788	-0.635	-0.955	-1.22	0.446	-0.161	-0.0216	0.3	1	0.929	0.296	0.162	0.461	0.00121	0.931	1	0.998
TR13559|c2_g2_i6	AT1G57680.2 | Symbols: | FUNCTIONS IN: molecular_function unknown; INVOLVED IN: biological_process unknown; LOCATED IN: endomembrane system; EXPRESSED IN: 24 plant structures; EXPRESSED DURING: 15 growth stages; CONTAINS InterPro DOMAIN/s: Uncharacterised conserved protein UCP031277 (InterPro:IPR016971); Has 35333 Blast hits to 34131 proteins in 2444 species: Archae - 798; Bacteria - 22429; Metaz…	-0.536	0.0823	0.307	-0.428	-0.497	-1.44	-1.13	0.148	-0.242	-0.211	0.608	1	0.843	0.864	0.242	0.0903	0.000986	1	1	0.879
TR13559|c2_g2_i7	AT1G57680.2 | Symbols: | FUNCTIONS IN: molecular_function unknown; INVOLVED IN: biological_process unknown; LOCATED IN: endomembrane system; EXPRESSED IN: 24 plant structures; EXPRESSED DURING: 15 growth stages; CONTAINS InterPro DOMAIN/s: Uncharacterised conserved protein UCP031277 (InterPro:IPR016971); Has 35333 Blast hits to 34131 proteins in 2444 species: Archae - 798; Bacteria - 22429; Metaz…	-1.16	0.0592	0.0913	-0.789	-0.516	-1.14	-1.23	0.22	-0.143	0.0184	0.183	1	0.981	0.238	0.265	0.29	0.00033	1	1	0.999
TR13559|c2_g2_i8	AT1G57680.2 | Symbols: | FUNCTIONS IN: molecular_function unknown; INVOLVED IN: biological_process unknown; LOCATED IN: endomembrane system; EXPRESSED IN: 24 plant structures; EXPRESSED DURING: 15 growth stages; CONTAINS InterPro DOMAIN/s: Uncharacterised conserved protein UCP031277 (InterPro:IPR016971); Has 35333 Blast hits to 34131 proteins in 2444 species: Archae - 798; Bacteria - 22429; Metaz…	-1.13	0.285	0.0288	-0.849	-0.596	-1.04	-1.09	0.242	-0.0404	-0.16	0.191	1	1	0.152	0.171	0.363	0.00332	1	1	0.925
TR13562|c2_g1_i11	AT1G50510.1 | Symbols: | indigoidine synthase A family protein | chr1:18716578-18719060 FORWARD LENGTH=330	-1.19	0.0328	-0.116	-0.604	-0.501	-2.77	-0.783	-0.532	-1.22	-0.238	0.475	1	0.986	0.938	0.616	0.031	0.533	1	0.287	0.941
TR13566|c3_g1_i8	AT3G54540.1 | Symbols: ATGCN4, GCN4 | general control non-repressible 4 | chr3:20190393-20192564 FORWARD LENGTH=723	-1.47	-0.245	-0.253	0.0639	-1.03	-0.234	-0.399	0.288	0.025	-0.148	0.0319	1	0.865	1	0.00312	0.899	0.584	1	1	0.92
TR13569|c1_g1_i4	AT2G21440.1 | Symbols: | RNA-binding (RRM/RBD/RNP motifs) family protein | chr2:9173712-9179065 REVERSE LENGTH=1003	-3.74	-1.17	-1.05	-0.323	-1.19	-0.619	-0.635	-0.196	0.307	-0.0945	0.0327	0.632	0.667	1	0.339	0.883	0.774	1	1	0.99
TR13576|c0_g1_i4	No informative hit E<10-6	0.0105	1.91	0	-1.9	0	17.7	4.76	5.81	4.2	2.88	1	1	1	1	1	0.0108	0.553	0.676	0.809	0.776
TR13580|c2_g2_i1	AT1G29880.1 | Symbols: | glycyl-tRNA synthetase / glycine--tRNA ligase | chr1:10459662-10462781 REVERSE LENGTH=729	-1.85	-0.13	-0.565	-0.126	-1.03	-0.75	-0.279	0.257	-0.445	-0.283	0.0538	1	0.669	1	0.0429	0.669	0.879	1	0.958	0.867
TR13593|c1_g1_i2	AT5G53390.1 | Symbols: | O-acyltransferase (WSD1-like) family protein | chr5:21656951-21659207 REVERSE LENGTH=486	1.14	0.602	1.07	0.671	-1.2	-1.93	-2.24	-0.28	-0.312	0.903	0.585	1	0.44	0.937	0.225	0.34	0.00319	1	1	0.557
TR13593|c1_g1_i6	AT5G53390.1 | Symbols: | O-acyltransferase (WSD1-like) family protein | chr5:21656951-21659207 REVERSE LENGTH=486	-0.0292	0.148	0.607	0.909	-1.69	-2.53	-2.33	-0.418	0.122	0.103	1	1	0.838	0.87	0.137	0.245	0.0115	1	1	0.99
TR13600|c0_g2_i3	AT5G25930.1 | Symbols: | Protein kinase family protein with leucine-rich repeat domain | chr5:9050880-9053978 FORWARD LENGTH=1005	5.92	1.22	2.46	0.577	1.67	3.64	-0.127	0.547	0.384	2.84	0.00167	0.901	0.132	1	0.169	0.185	0.991	1	1	0.0437
TR13600|c0_g2_i4	AT5G25930.1 | Symbols: | Protein kinase family protein with leucine-rich repeat domain | chr5:9050880-9053978 FORWARD LENGTH=1005	5.51	1.3	1.7	1.45	1.06	5.68	1.82	1.05	0.94	1.88	0.00368	0.833	0.486	0.644	0.402	0.00193	0.282	0.955	0.95	0.218
TR13601|c0_g1_i1	AT4G38690.1 | Symbols: | PLC-like phosphodiesterases superfamily protein | chr4:18074743-18075699 REVERSE LENGTH=318	2.75	0.583	0.716	0.449	1	-0.124	0.646	-0.39	-0.206	-0.175	0.0499	1	0.744	1	0.216	0.986	0.733	1	1	0.959
TR13606|c0_g3_i2	AT1G63020.2 | Symbols: NRPD1A | nuclear RNA polymerase D1A | chr1:23355329-23361126 REVERSE LENGTH=1453	-3.17	-0.556	-0.473	-0.213	-1.93	-2	-0.659	0.283	-0.307	-1.32	0.0023	0.951	0.829	1	0.00325	0.104	0.581	1	1	0.0366
TR13606|c0_g3_i4	AT1G63020.2 | Symbols: NRPD1A | nuclear RNA polymerase D1A | chr1:23355329-23361126 REVERSE LENGTH=1453	-2.96	-0.697	-0.771	-0.0566	-1.44	-1.71	-0.48	0.533	-0.476	-1.29	0.00554	0.834	0.595	1	0.0316	0.238	0.774	0.97	0.963	0.0648
TR13606|c0_g3_i5	AT1G63020.2 | Symbols: NRPD1A | nuclear RNA polymerase D1A | chr1:23355329-23361126 REVERSE LENGTH=1453	-2.09	-0.228	-0.554	-0.213	-1.1	-1.11	-0.0419	0.113	-0.233	-0.949	0.03	1	0.703	1	0.0625	0.43	0.993	1	1	0.141
TR13606|c0_g3_i6	AT1G63020.2 | Symbols: NRPD1A | nuclear RNA polymerase D1A | chr1:23355329-23361126 REVERSE LENGTH=1453	-2.52	-0.604	-0.718	-0.433	-0.766	-1.67	-0.522	0.0281	-0.208	-0.971	0.00469	0.83	0.513	0.922	0.226	0.108	0.619	1	1	0.112
TR13606|c0_g3_i7	AT1G63020.2 | Symbols: NRPD1A | nuclear RNA polymerase D1A | chr1:23355329-23361126 REVERSE LENGTH=1453	-3.36	-0.653	-0.586	-0.147	-1.98	-2.51	-0.468	-0.0052	-0.657	-1.38	0.000216	0.806	0.711	1	0.00089	0.00571	0.732	1	0.666	0.00889
TR13606|c0_g3_i9	AT1G63020.2 | Symbols: NRPD1A | nuclear RNA polymerase D1A | chr1:23355329-23361126 REVERSE LENGTH=1453	-1.78	-0.0645	-0.438	-0.39	-0.883	-2.21	-0.477	-0.224	-0.329	-1.18	0.109	1	0.83	1	0.186	0.0236	0.722	1	1	0.0437
TR13618|c1_g1_i5	AT1G31910.1 | Symbols: | GHMP kinase family protein | chr1:11459050-11461649 FORWARD LENGTH=505	0.223	-0.0932	0.0624	0.183	0.0716	-1.47	-0.249	-0.28	-0.201	-0.741	0.86	1	0.989	1	0.914	0.0418	0.835	1	1	0.0671
TR13618|c1_g1_i7	AT1G31910.2 | Symbols: | GHMP kinase family protein | chr1:11459050-11461386 FORWARD LENGTH=450	-2.32	-0.658	-0.216	0.405	-1.85	-3.55	-0.979	-0.442	-0.768	-1.36	0.162	0.932	0.971	1	0.0514	0.00445	0.301	1	0.869	0.136
TR13622|c2_g1_i3	AT3G13682.1 | Symbols: LDL2 | LSD1-like2 | chr3:4479193-4481509 REVERSE LENGTH=746	-3.39	-0.942	-0.693	0.242	-2	-0.974	-0.334	-0.334	-0.128	-0.177	0.0408	0.752	0.76	1	0.0832	0.724	0.903	1	1	0.969
TR13627|c3_g1_i4	AT5G20410.1 | Symbols: MGD2, ATMGD2 | monogalactosyldiacylglycerol synthase 2 | chr5:6896765-6898581 FORWARD LENGTH=468	-0.771	0.303	-0.329	-0.754	0.0093	-1.33	-0.0226	-0.134	0.121	-1.29	0.523	1	0.876	0.49	0.997	0.264	0.997	1	1	0.00125
TR13640|c0_g1_i3	AT5G10560.1 | Symbols: | Glycosyl hydrolase family protein | chr5:3336335-3339351 REVERSE LENGTH=792	7.39	2.74	0.71	2.95	0.985	0.154	0.44	-0.181	-0.329	0.223	0.00498	0.377	0.931	0.282	0.594	0.997	0.955	1	1	0.98
TR13640|c0_g1_i8	AT5G10560.1 | Symbols: | Glycosyl hydrolase family protein | chr5:3336335-3339351 REVERSE LENGTH=792	8.91	3.26	1.2	4.18	0.272	-0.923	0.381	-0.203	-1.2	0.0996	3.51e-05	0.0751	0.76	0.0123	0.901	0.878	0.955	1	0.938	0.994
TR13641|c3_g1_i4	AT1G53050.1 | Symbols: | Protein kinase superfamily protein | chr1:19772574-19775531 FORWARD LENGTH=694	1.92	0.0221	0.358	0.469	1.07	0.598	0.041	-0.0557	0.0958	0.517	0.0313	1	0.848	0.914	0.0243	0.732	0.993	1	1	0.567
TR13642|c1_g2_i2	AT3G20720.2 | Symbols: | unknown protein; FUNCTIONS IN: molecular_function unknown; INVOLVED IN: biological_process unknown; EXPRESSED IN: 22 plant structures; EXPRESSED DURING: 13 growth stages. | chr3:7240098-7246754 FORWARD LENGTH=1199	-1.8	-0.208	-0.621	0.304	-1.27	-1.12	-0.528	-0.109	-0.32	-0.167	0.128	1	0.72	1	0.0308	0.515	0.697	1	1	0.949
TR13643|c1_g2_i3	AT1G09940.1 | Symbols: HEMA2 | Glutamyl-tRNA reductase family protein | chr1:3237224-3239262 REVERSE LENGTH=530	-1.13	-0.00495	-0.4	0.659	-1.39	0.574	0.223	0.423	-0.0362	-0.0366	0.509	1	0.906	0.95	0.0352	0.859	0.95	1	1	0.998
TR13643|c1_g2_i5	AT1G58290.1 | Symbols: HEMA1 | Glutamyl-tRNA reductase family protein | chr1:21624028-21626051 REVERSE LENGTH=543	-1.45	-0.222	-0.218	0.21	-1.22	0.615	-0.0206	0.491	0.0994	0.0457	0.277	1	0.96	1	0.0301	0.805	0.999	1	1	0.994
TR13645|c1_g1_i1	AT3G03890.1 | Symbols: | FMN binding | chr3:999667-1001996 REVERSE LENGTH=321	-1.97	-0.407	-0.515	-0.529	-0.519	-0.197	0.205	0.29	-0.197	-0.495	0.0352	1	0.731	0.87	0.374	0.949	0.93	1	1	0.645
TR13648|c2_g1_i4	AT3G58800.1 | Symbols: | unknown protein; Has 75 Blast hits to 75 proteins in 23 species: Archae - 0; Bacteria - 0; Metazoa - 0; Fungi - 0; Plants - 53; Viruses - 17; Other Eukaryotes - 5 (source: NCBI BLink). | chr3:21748562-21749596 FORWARD LENGTH=344	-2.76	-1.16	-0.226	-0.351	-1.02	-0.24	-0.185	-0.29	-0.318	0.553	0.0161	0.304	0.959	1	0.12	0.952	0.956	1	1	0.728
TR14127|c1_g3_i14	AT2G11000.1 | Symbols: ATMAK10, MAK10 | MAK10 homologue | chr2:4341328-4347768 REVERSE LENGTH=728	0.628	-0.438	-0.356	-0.503	1.92	-0.0413	-0.315	-0.483	-0.124	0.881	0.776	1	0.92	1	0.0102	1	0.912	1	1	0.541
TR14134|c1_g2_i2	AT1G42430.1 | Symbols: | unknown protein; BEST Arabidopsis thaliana protein match is: unknown protein (TAIR:AT3G55760.3); Has 186 Blast hits to 143 proteins in 47 species: Archae - 0; Bacteria - 23; Metazoa - 14; Fungi - 6; Plants - 87; Viruses - 0; Other Eukaryotes - 56 (source: NCBI BLink). | chr1:15891512-15894322 FORWARD LENGTH=426	-0.491	-0.0891	-0.3	-0.182	0.0804	1.16	0.0063	0.165	-0.105	1.09	0.741	1	0.905	1	0.928	0.423	1	1	1	0.0293
TR14134|c1_g2_i3	AT1G42430.1 | Symbols: | unknown protein; BEST Arabidopsis thaliana protein match is: unknown protein (TAIR:AT3G55760.3); Has 186 Blast hits to 143 proteins in 47 species: Archae - 0; Bacteria - 23; Metazoa - 14; Fungi - 6; Plants - 87; Viruses - 0; Other Eukaryotes - 56 (source: NCBI BLink). | chr1:15891512-15894322 FORWARD LENGTH=426	0.6	0.235	-0.177	-0.0237	0.564	1.47	0.177	0.193	-0.0517	1.16	0.708	1	0.968	1	0.299	0.298	0.95	1	1	0.0219
TR14134|c1_g2_i4	AT1G42430.2 | Symbols: | unknown protein; FUNCTIONS IN: molecular_function unknown; INVOLVED IN: biological_process unknown; LOCATED IN: cellular_component unknown; BEST Arabidopsis thaliana protein match is: unknown protein (TAIR:AT3G55760.3). | chr1:15891512-15894322 FORWARD LENGTH=409	0.601	0.106	0.0777	-0.349	0.766	1.93	0.549	0.183	-0.3	1.5	0.762	1	0.994	1	0.2	0.223	0.753	1	1	0.00535
TR14134|c1_g2_i6	AT1G42430.2 | Symbols: | unknown protein; FUNCTIONS IN: molecular_function unknown; INVOLVED IN: biological_process unknown; LOCATED IN: cellular_component unknown; BEST Arabidopsis thaliana protein match is: unknown protein (TAIR:AT3G55760.3). | chr1:15891512-15894322 FORWARD LENGTH=409	0.69	0.0202	0.27	-0.412	0.813	1.84	0.182	0.208	-0.345	1.79	0.786	1	0.965	1	0.309	0.435	0.971	1	1	0.0125
TR14139|c1_g1_i18	AT3G54826.1 | Symbols: | Zim17-type zinc finger protein | chr3:20310354-20311652 FORWARD LENGTH=223	3.02	1.61	0.255	-0.17	1.32	0.934	0.416	0.482	-0.317	0.353	0.0489	0.218	0.965	1	0.0962	0.773	0.896	1	1	0.907
TR14142|c0_g2_i4	AT3G12360.1 | Symbols: ITN1 | Ankyrin repeat family protein | chr3:3934146-3936495 FORWARD LENGTH=590	2.74	0.752	0.77	0.55	0.673	1.57	0.324	0.277	0.336	0.631	0.00255	0.671	0.513	0.877	0.245	0.206	0.864	1	1	0.485
TR14147|c0_g1_i4	AT1G19715.2 | Symbols: | Mannose-binding lectin superfamily protein | chr1:6816934-6819244 REVERSE LENGTH=571	-2.71	-0.546	-0.319	-0.657	-1.19	-1.25	-0.0386	-0.164	-0.502	-0.544	0.0158	0.981	0.928	0.847	0.0571	0.503	0.997	1	0.981	0.707
TR14158|c1_g2_i3	No informative hit E<10-6	1.93	0.758	1.08	0.946	-0.857	-7.03	-0.103	-3.55	-3.06	-0.307	0.507	1	0.794	1	0.541	0.0113	0.994	0.31	0.301	0.96
TR14158|c1_g2_i5	No informative hit E<10-6	0.482	0.277	0.904	-0.305	-0.394	-9.97	-0.167	-5.66	-1.48	-2.67	0.95	1	0.923	1	0.889	0.00772	0.993	0.134	0.999	0.368
TR14166|c0_g1_i13	AT4G27670.1 | Symbols: HSP21 | heat shock protein 21 | chr4:13819048-13819895 REVERSE LENGTH=227	9.29	3.77	2.11	0.492	2.92	5.64	3.75	0.389	-0.913	2.41	0.0112	0.183	0.687	1	0.205	0.353	0.0856	1	1	0.491
TR14166|c0_g1_i14	AT4G27670.1 | Symbols: HSP21 | heat shock protein 21 | chr4:13819048-13819895 REVERSE LENGTH=227	6.65	4.14	1.38	-1.08	2.21	3.19	2.99	-2.63	-0.161	2.99	0.0357	0.0146	0.774	1	0.171	0.738	0.203	0.834	1	0.41
TR14166|c0_g1_i3	AT4G27670.1 | Symbols: HSP21 | heat shock protein 21 | chr4:13819048-13819895 REVERSE LENGTH=227	5.78	4.74	-0.35	-0.749	2.13	4.81	1.67	1.83	-1.62	2.92	0.192	0.0256	0.984	1	0.498	1	0.736	1	1	0.7
TR14166|c0_g1_i7	AT4G27670.1 | Symbols: HSP21 | heat shock protein 21 | chr4:13819048-13819895 REVERSE LENGTH=227	7.16	2.4	2.33	-0.503	2.94	9.85	3.19	1.66	1.58	3.43	0.0369	0.733	0.59	1	0.138	0.106	0.282	1	1	0.358
TR14168|c0_g1_i2	AT2G38320.1 | Symbols: TBL34 | TRICHOME BIREFRINGENCE-LIKE 34 | chr2:16055488-16057874 FORWARD LENGTH=410	1.66	0.566	0.388	0.954	-0.253	3.57	0.324	1.06	0.955	1.23	0.45	1	0.951	0.826	0.855	0.0379	0.945	0.868	0.809	0.368
TR14173|c1_g3_i1	AT3G51950.2 | Symbols: | Zinc finger (CCCH-type) family protein / RNA recognition motif (RRM)-containing protein | chr3:19278244-19280407 REVERSE LENGTH=540	-2.69	-0.55	-1.04	-0.223	-0.881	-1.74	-0.638	-0.106	-0.363	-0.637	0.0213	0.986	0.387	1	0.204	0.274	0.648	1	1	0.645
TR14181|c1_g1_i2	AT3G04730.1 | Symbols: IAA16 | indoleacetic acid-induced protein 16 | chr3:1288993-1290415 REVERSE LENGTH=236	0.105	-0.283	-0.275	-0.823	1.49	1.09	1.69	-0.496	0.163	-0.269	0.993	1	0.97	0.978	0.0742	0.723	0.0181	1	1	0.931
TR14201|c2_g2_i1	AT2G26695.1 | Symbols: | Ran BP2/NZF zinc finger-like superfamily protein | chr2:11365275-11365789 FORWARD LENGTH=138	-4.66	-0.344	-1.4	-2.72	-0.186	-4.22	0.31	-0.152	-1.55	-2.83	0.0178	1	0.611	0.047	0.918	0.045	0.956	1	0.564	0.0057
TR14201|c2_g2_i3	AT2G26695.1 | Symbols: | Ran BP2/NZF zinc finger-like superfamily protein | chr2:11365275-11365789 FORWARD LENGTH=138	-3.7	0.0715	-1.51	-2.2	-0.0519	-2.74	0.405	0.0982	-1.56	-1.68	0.00331	1	0.174	0.00592	0.974	0.0616	0.883	1	0.127	0.0179
TR14201|c2_g2_i4	AT2G26695.1 | Symbols: | Ran BP2/NZF zinc finger-like superfamily protein | chr2:11365275-11365789 FORWARD LENGTH=138	-3.33	0.671	-1.16	-2.34	-0.5	-2.89	0.217	0.167	-1.49	-1.79	0.0385	1	0.575	0.0143	0.636	0.0857	0.962	1	0.299	0.0334
TR14201|c2_g2_i5	AT2G26695.1 | Symbols: | Ran BP2/NZF zinc finger-like superfamily protein | chr2:11365275-11365789 FORWARD LENGTH=138	-2.61	0.364	-1.13	-1.71	-0.132	-3.07	0.387	0.0978	-1.45	-2.1	0.0759	1	0.482	0.0941	0.92	0.0305	0.896	1	0.24	0.00122
TR14212|c2_g2_i4	AT5G58920.1 | Symbols: | unknown protein; Has 1807 Blast hits to 1807 proteins in 277 species: Archae - 0; Bacteria - 0; Metazoa - 736; Fungi - 347; Plants - 385; Viruses - 0; Other Eukaryotes - 339 (source: NCBI BLink). | chr5:23793239-23794014 FORWARD LENGTH=162	-1.87	-2.96	0.579	0.774	-0.262	2.2	0.627	0.433	0.7	0.443	0.46	0.0255	0.901	1	0.888	0.473	0.868	1	1	0.921
TR14228|c3_g1_i1	AT5G19140.2 | Symbols: ATAILP1, AILP1 | Aluminium induced protein with YGL and LRDR motifs | chr5:6423398-6425785 FORWARD LENGTH=222	-2.83	-0.0372	-1.1	-1.1	-0.588	-1.18	0.217	-0.707	-0.776	0.0869	0.0332	1	0.408	0.635	0.463	0.638	0.952	0.933	0.954	0.984
TR14237|c0_g2_i4	AT5G61030.1 | Symbols: GR-RBP3 | glycine-rich RNA-binding protein 3 | chr5:24560870-24562152 FORWARD LENGTH=309	0.236	0.161	0.146	0.092	-0.163	3.42	0.16	1.14	0.58	1.55	0.951	1	0.985	1	0.923	0.0283	0.974	0.55	1	0.259
TR14240|c2_g1_i9	No informative hit E<10-6	5.53	-0.395	0.795	3.48	1.65	4.87	0.984	0.719	2.66	0.51	0.0153	1	0.838	0.27	0.0932	0.0222	0.66	1	0.349	0.878
TR14242|c0_g2_i1	AT3G52740.1 | Symbols: | unknown protein; BEST Arabidopsis thaliana protein match is: unknown protein (TAIR:AT3G44450.1); Has 65 Blast hits to 65 proteins in 13 species: Archae - 0; Bacteria - 0; Metazoa - 0; Fungi - 0; Plants - 65; Viruses - 0; Other Eukaryotes - 0 (source: NCBI BLink). | chr3:19546446-19546868 REVERSE LENGTH=140	0.959	-0.623	0.282	0.366	0.934	0.58	0.403	0.157	0.00909	0.0109	0.396	0.725	0.901	1	0.0372	0.764	0.754	1	1	1
TR14242|c0_g2_i5	AT3G52740.1 | Symbols: | unknown protein; BEST Arabidopsis thaliana protein match is: unknown protein (TAIR:AT3G44450.1); Has 65 Blast hits to 65 proteins in 13 species: Archae - 0; Bacteria - 0; Metazoa - 0; Fungi - 0; Plants - 65; Viruses - 0; Other Eukaryotes - 0 (source: NCBI BLink). | chr3:19546446-19546868 REVERSE LENGTH=140	1.22	-0.0294	0.355	-0.265	1.16	1.06	0.811	0.0779	0.00466	0.166	0.327	1	0.879	1	0.0208	0.542	0.304	1	1	0.946
TR14245|c0_g1_i1	AT4G39260.3 | Symbols: CCR1, ATGRP8, GR-RBP8, GRP8 | cold, circadian rhythm, and RNA binding 1 | chr4:18274166-18274958 REVERSE LENGTH=92	-0.916	-0.205	0.257	-0.408	-0.56	-1.98	-0.95	0.143	-0.0828	-1.09	0.429	1	0.92	0.984	0.311	0.0343	0.0918	1	1	0.0333
TR14253|c0_g2_i1	AT2G33540.1 | Symbols: CPL3, ATCPL3 | C-terminal domain phosphatase-like 3 | chr2:14204081-14208797 REVERSE LENGTH=1241	-3.31	-0.728	-1.12	-0.123	-1.33	-1.51	-0.565	0.14	-0.552	-0.53	0.00306	0.844	0.329	1	0.0498	0.392	0.719	1	0.96	0.746
TR14254|c3_g1_i3	AT2G39000.1 | Symbols: | Acyl-CoA N-acyltransferases (NAT) superfamily protein | chr2:16286454-16287941 REVERSE LENGTH=291	1.35	0.189	0.389	0.0204	0.756	0.277	0.527	-0.414	0.0229	0.141	0.0437	1	0.681	1	0.0247	0.871	0.302	0.843	1	0.923
TR14259|c1_g2_i3	AT1G69760.1 | Symbols: | unknown protein; BEST Arabidopsis thaliana protein match is: unknown protein (TAIR:AT1G26920.1); Has 51 Blast hits to 51 proteins in 15 species: Archae - 0; Bacteria - 2; Metazoa - 2; Fungi - 7; Plants - 29; Viruses - 0; Other Eukaryotes - 11 (source: NCBI BLink). | chr1:26240094-26240627 REVERSE LENGTH=177	0.949	-0.195	0.107	0.0787	0.958	1.37	0.295	0.646	0.376	0.0536	0.282	1	0.974	1	0.00958	0.115	0.808	0.5	0.941	0.983
TR14272|c4_g1_i4	AT2G32530.1 | Symbols: ATCSLB03, CSLB03, ATCSLB3 | cellulose synthase-like B3 | chr2:13809283-13813487 FORWARD LENGTH=755	-11.7	-2.51	-6.17	-2.99	0	-15	-1.1	-5.58	-0.125	-8.21	1	1	0.414	0.952	1	0.0415	0.942	0.605	1	0.108
TR14274|c2_g1_i9	No informative hit E<10-6	1.04	-0.798	0.934	-0.89	1.79	0.616	0.00791	-0.0759	0.798	-0.114	0.706	0.998	0.76	0.96	0.0429	0.897	1	1	0.985	0.985
TR14278|c2_g1_i1	No informative hit E<10-6	7.72	8.31	3.07	0.184	-3.84	2.2	0.987	0.0199	1.06	0.134	0.157	0.0429	0.723	1	0.16	0.847	0.936	1	1	0.998
TR14279|c1_g1_i3	AT2G27040.2 | Symbols: AGO4 | Argonaute family protein | chr2:11536795-11541503 REVERSE LENGTH=924	-2.53	-0.477	-0.807	-0.379	-0.867	-0.784	-0.116	0.151	-0.324	-0.496	0.0444	1	0.637	1	0.232	0.765	0.98	1	1	0.787
TR14279|c1_g1_i5	AT2G27040.2 | Symbols: AGO4 | Argonaute family protein | chr2:11536795-11541503 REVERSE LENGTH=924	-2.92	-0.481	-0.873	0.117	-1.68	-1.2	0.163	-0.0486	-0.455	-0.86	0.0339	1	0.609	1	0.054	0.574	0.965	1	1	0.497
TR14300|c0_g3_i1	AT2G15680.1 | Symbols: | Calcium-binding EF-hand family protein | chr2:6831024-6831587 FORWARD LENGTH=187	-1.21	0.327	0.255	-1.15	-0.641	-1.95	0.184	0.151	-0.658	-1.63	0.347	1	0.942	0.185	0.3	0.117	0.95	1	0.823	0.000704
TR14305|c1_g1_i1	AT3G21430.2 | Symbols: ATALY3, ALY3 | DNA binding | chr3:7544800-7552841 REVERSE LENGTH=1132	-3.08	-0.859	-0.934	-0.42	-0.867	-1.29	-0.583	-0.0406	-0.0986	-0.564	0.00199	0.398	0.227	0.996	0.326	0.346	0.452	1	1	0.685
TR14306|c1_g2_i2	AT4G18700.1 | Symbols: CIPK12, SnRK3.9, ATWL4, WL4 | CBL-interacting protein kinase 12 | chr4:10289110-10290579 REVERSE LENGTH=489	-0.786	-0.295	-0.173	0.0295	-0.347	-2.01	-0.478	-0.505	-0.283	-0.745	0.429	1	0.944	1	0.525	0.00374	0.54	0.754	1	0.178
TR14306|c1_g2_i4	AT4G18700.1 | Symbols: CIPK12, SnRK3.9, ATWL4, WL4 | CBL-interacting protein kinase 12 | chr4:10289110-10290579 REVERSE LENGTH=489	-1.19	-0.485	-0.169	-0.0427	-0.492	-1.61	-0.324	-0.316	-0.172	-0.795	0.145	0.763	0.94	1	0.301	0.0295	0.757	0.999	1	0.0972
TR14309|c4_g2_i2	AT3G01090.2 | Symbols: AKIN10, KIN10 | SNF1 kinase homolog 10 | chr3:31437-34143 REVERSE LENGTH=535	2.22	0.648	0.365	0.318	0.89	-0.0536	0.429	-0.104	-0.0568	-0.322	0.0191	0.83	0.859	1	0.103	0.997	0.767	1	1	0.85
TR14309|c4_g2_i3	AT3G01090.2 | Symbols: AKIN10, KIN10 | SNF1 kinase homolog 10 | chr3:31437-34143 REVERSE LENGTH=535	2.36	0.817	0.717	-0.00678	0.833	0.032	0.0577	-0.213	0.447	-0.259	0.0292	0.731	0.617	1	0.186	1	0.992	1	0.975	0.904
TR14309|c4_g2_i4	AT3G01090.2 | Symbols: AKIN10, KIN10 | SNF1 kinase homolog 10 | chr3:31437-34143 REVERSE LENGTH=535	1.07	-0.255	-0.0544	-0.404	1.79	-0.0654	0.372	0.202	0.00962	-0.649	0.55	1	0.998	1	0.0234	0.998	0.871	1	1	0.666
TR14883|c1_g1_i3	AT4G17390.1 | Symbols: | Ribosomal protein L23/L15e family protein | chr4:9714407-9715545 REVERSE LENGTH=204	-1	0.03	-0.294	0.0807	-0.821	0.874	0.17	0.241	0.5	-0.0368	0.249	1	0.848	1	0.0488	0.457	0.922	1	0.749	0.992
TR14926|c4_g2_i4	AT2G20820.1 | Symbols: | unknown protein; Has 44 Blast hits to 44 proteins in 13 species: Archae - 0; Bacteria - 0; Metazoa - 0; Fungi - 0; Plants - 44; Viruses - 0; Other Eukaryotes - 0 (source: NCBI BLink). | chr2:8964450-8965166 FORWARD LENGTH=93	1.63	0.486	0.188	-0.191	1.15	0.366	0.208	0.0129	0.0432	0.102	0.13	0.978	0.96	1	0.0228	0.893	0.936	1	1	0.974
TR14928|c0_g2_i3	AT5G10010.1 | Symbols: | unknown protein; FUNCTIONS IN: molecular_function unknown; INVOLVED IN: biological_process unknown; LOCATED IN: nucleolus; EXPRESSED IN: 25 plant structures; EXPRESSED DURING: 15 growth stages; BEST Arabidopsis thaliana protein match is: unknown protein (TAIR:AT5G64910.1); Has 33260 Blast hits to 16857 proteins in 1270 species: Archae - 88; Bacteria - 3040; Metazoa - 1191…	-1.75	-0.087	-0.0527	-0.107	-1.5	-0.834	-0.436	0.316	0.0906	-0.804	0.0805	1	0.993	1	0.0273	0.568	0.603	1	1	0.381
TR14930|c0_g1_i1	AT1G24020.2 | Symbols: MLP423 | MLP-like protein 423 | chr1:8500653-8501458 REVERSE LENGTH=155	7.02	4	2.02	1.65	-0.642	16.7	6.08	2.18	4.37	4.03	0.0446	0.306	0.709	0.942	0.796	1.75e-08	0.028	0.816	0.0756	0.0497
TR14930|c0_g1_i2	AT1G24020.2 | Symbols: MLP423 | MLP-like protein 423 | chr1:8500653-8501458 REVERSE LENGTH=155	14.8	4.04	7.36	3.26	0.135	12.7	4.26	2.5	2.01	3.97	1.15e-05	0.368	0.0143	0.315	0.971	7.36e-05	0.304	0.703	0.794	0.0476
TR14930|c0_g1_i3	No informative hit E<10-6	11.3	3.01	5.71	2.66	-0.0297	11.3	1.87	3.69	3.02	2.76	9.05e-06	0.372	0.00585	0.301	0.996	1.17e-06	0.661	0.0774	0.158	0.118
TR14930|c0_g1_i4	No informative hit E<10-6	12.5	4.28	4.85	2.75	0.578	11.1	1.84	3.11	3.24	2.87	2.56e-07	0.0588	0.015	0.238	0.77	1.14e-06	0.663	0.174	0.0871	0.0783
TR14930|c0_g1_i5	AT1G24020.2 | Symbols: MLP423 | MLP-like protein 423 | chr1:8500653-8501458 REVERSE LENGTH=155	12.6	3.23	5.27	3.95	0.192	15.1	4.78	1.23	4.52	4.56	0.00239	0.862	0.202	0.13	0.961	5.22e-08	0.14	1	0.0111	0.00503
TR14930|c0_g1_i6	No informative hit E<10-6	9.92	4.02	3.78	1.9	0.219	14.9	5.48	2.73	3.59	3.1	0.000219	0.252	0.0974	0.68	0.932	2.08e-09	0.0368	0.354	0.0537	0.0628
TR14934|c4_g2_i1	AT3G23990.1 | Symbols: HSP60, HSP60-3B | heat shock protein 60 | chr3:8669013-8672278 FORWARD LENGTH=577	-0.813	0.239	-0.453	-0.703	0.103	3.68	0.7	1.02	0.849	1.11	0.629	1	0.856	0.831	0.935	9.5e-05	0.54	0.448	0.654	0.151
TR14934|c5_g3_i2	AT3G23990.1 | Symbols: HSP60, HSP60-3B | heat shock protein 60 | chr3:8669013-8672278 FORWARD LENGTH=577	-0.56	0.311	-0.296	-0.171	-0.404	2.84	0.704	0.692	0.81	0.632	0.737	1	0.92	1	0.593	0.00228	0.469	0.801	0.595	0.567
TR14934|c5_g3_i5	AT3G23990.1 | Symbols: HSP60, HSP60-3B | heat shock protein 60 | chr3:8669013-8672278 FORWARD LENGTH=577	-0.127	0.263	-0.393	-0.109	0.112	2.45	0.818	0.44	0.481	0.715	0.969	1	0.879	1	0.921	0.031	0.383	1	0.992	0.527
TR14951|c2_g1_i7	AT3G18215.1 | Symbols: | Protein of unknown function, DUF599 | chr3:6240968-6242358 FORWARD LENGTH=244	2.87	0.662	1.11	-1.17	2.27	-0.15	1.23	-1.76	0.0723	0.302	0.381	1	0.842	1	0.0487	0.994	0.622	0.662	1	0.955
TR14953|c0_g2_i1	AT2G15480.1 | Symbols: UGT73B5 | UDP-glucosyl transferase 73B5 | chr2:6758817-6760452 FORWARD LENGTH=484	-3.84	-0.21	-0.742	-1.68	-1.2	-6.27	-0.267	-2.56	-0.142	-3.29	0.0456	1	0.855	0.497	0.266	3.43e-05	0.962	0.0323	1	8.18e-05
TR14958|c1_g2_i1	AT1G43160.1 | Symbols: RAP2.6 | related to AP2 6 | chr1:16263989-16264663 FORWARD LENGTH=192	3.09	1.41	2.55	-0.298	-0.57	10.5	2.06	4.2	3.28	0.944	0.455	0.944	0.523	1	0.837	0.00059	0.492	0.168	0.469	0.88
TR14962|c3_g3_i8	AT1G18180.1 | Symbols: | Protein of unknown function (DUF1295) | chr1:6255903-6257737 FORWARD LENGTH=305	2.61	0.876	-0.115	-0.213	2.07	0.251	-0.199	-0.23	0.505	0.174	0.188	0.969	0.994	1	0.0429	0.972	0.973	1	1	0.978
TR14968|c1_g2_i23	No informative hit E<10-6	8.56	0.869	0.451	3.94	3.3	-14	-4.82	-3.84	-0.972	-4.33	0.18	1	0.99	0.784	0.38	0.0295	0.384	0.882	1	0.544
TR14968|c1_g2_i26	No informative hit E<10-6	6.13	0.851	0.12	3.06	2.1	-13.7	-3.65	-1.86	-2.72	-5.51	0.35	1	1	0.916	0.567	0.0479	0.584	1	0.972	0.349
TR15067|c1_g2_i1	AT3G51860.1 | Symbols: CAX3, ATHCX1, CAX1-LIKE, ATCAX3 | cation exchanger 3 | chr3:19239458-19242519 FORWARD LENGTH=459	-1.37	-0.377	-0.324	0.483	-1.16	-0.215	-0.635	0.528	-0.209	0.101	0.146	1	0.865	0.887	0.00693	0.937	0.401	0.867	1	0.967
TR15073|c2_g1_i1	AT3G25570.2 | Symbols: | Adenosylmethionine decarboxylase family protein | chr3:9287413-9288462 REVERSE LENGTH=349	-2.95	-0.0237	-0.798	-0.787	-1.35	-0.927	0.053	0.0158	-0.264	-0.732	0.00283	1	0.536	0.659	0.0123	0.654	0.992	1	1	0.48
TR15073|c2_g1_i15	AT3G25570.2 | Symbols: | Adenosylmethionine decarboxylase family protein | chr3:9287413-9288462 REVERSE LENGTH=349	-2.68	0.152	-0.523	-0.777	-1.54	-1.25	0.00606	0.0636	-0.44	-0.883	0.0166	1	0.815	0.727	0.00692	0.519	1	1	1	0.366
TR15073|c2_g1_i4	AT3G25570.2 | Symbols: | Adenosylmethionine decarboxylase family protein | chr3:9287413-9288462 REVERSE LENGTH=349	-2.82	-0.102	-0.488	-0.962	-1.26	-1.45	-0.0306	0.105	-0.738	-0.783	0.00762	1	0.828	0.458	0.0256	0.402	0.997	1	0.788	0.439
TR15073|c2_g1_i5	AT3G25570.2 | Symbols: | Adenosylmethionine decarboxylase family protein | chr3:9287413-9288462 REVERSE LENGTH=349	-2.38	-0.157	-0.729	-0.47	-1.02	-1.48	-0.355	-0.221	-0.441	-0.465	0.0244	1	0.609	0.997	0.0689	0.347	0.865	1	1	0.752
TR15073|c2_g1_i6	AT3G25570.2 | Symbols: | Adenosylmethionine decarboxylase family protein | chr3:9287413-9288462 REVERSE LENGTH=349	-2.63	-0.227	-0.937	-0.422	-1.05	-1.81	-0.503	0.0329	-0.563	-0.778	0.0234	1	0.485	1	0.0965	0.259	0.789	1	0.972	0.486
TR15073|c2_g1_i7	AT3G25570.2 | Symbols: | Adenosylmethionine decarboxylase family protein | chr3:9287413-9288462 REVERSE LENGTH=349	-2.98	-0.00821	-0.514	-0.903	-1.56	-0.934	0.039	0.0749	-0.33	-0.718	0.00201	1	0.789	0.464	0.00239	0.641	0.996	1	1	0.475
TR15073|c2_g1_i8	AT3G25570.2 | Symbols: | Adenosylmethionine decarboxylase family protein | chr3:9287413-9288462 REVERSE LENGTH=349	-2.49	-0.119	-0.634	-0.474	-1.27	-1.31	-0.349	0.17	-0.51	-0.617	0.0117	1	0.677	0.983	0.0146	0.42	0.86	1	0.962	0.573
TR15073|c2_g1_i9	AT3G25570.2 | Symbols: | Adenosylmethionine decarboxylase family protein | chr3:9287413-9288462 REVERSE LENGTH=349	-2.82	-0.337	-0.576	-0.531	-1.38	-1.73	-0.742	0.0727	-0.582	-0.474	0.0225	1	0.81	1	0.0319	0.348	0.613	1	0.979	0.804
TR15089|c0_g1_i5	AT5G16990.1 | Symbols: | Zinc-binding dehydrogenase family protein | chr5:5581831-5583849 REVERSE LENGTH=343	1.22	0.144	-0.33	0.194	1.21	1.69	0.981	0.047	-0.0507	0.716	0.396	1	0.92	1	0.0398	0.31	0.316	1	1	0.564
TR15111|c2_g1_i10	AT3G11210.1 | Symbols: | SGNH hydrolase-type esterase superfamily protein | chr3:3511101-3512899 REVERSE LENGTH=256	2.13	0.319	0.882	-0.314	1.25	-0.542	0.26	-0.362	0.037	-0.477	0.0548	1	0.456	1	0.0256	0.828	0.918	1	1	0.752
TR15118|c2_g1_i8	AT4G17080.1 | Symbols: | Histone H3 K4-specific methyltransferase SET7/9 family protein | chr4:9601570-9603815 FORWARD LENGTH=513	-0.381	-0.444	-0.077	0.04	0.0996	0.473	-0.357	0.0904	-0.377	1.12	0.789	0.977	0.989	1	0.899	0.807	0.801	1	0.951	0.0159
TR15119|c1_g1_i4	AT3G03330.1 | Symbols: | NAD(P)-binding Rossmann-fold superfamily protein | chr3:783572-786148 REVERSE LENGTH=328	1.91	0.173	0.189	0.925	0.625	-3.41	-0.605	-0.64	-0.15	-2.01	0.272	1	0.979	0.839	0.512	0.0175	0.786	1	1	0.00443
TR15130|c0_g2_i3	AT4G37650.1 | Symbols: SHR, SGR7 | GRAS family transcription factor | chr4:17691871-17693466 FORWARD LENGTH=531	-1.49	-0.0744	-0.552	-0.225	-0.641	-0.902	-0.133	0.0652	-0.237	-0.598	0.0495	1	0.536	1	0.135	0.417	0.945	1	1	0.326
TR15139|c1_g1_i1	AT5G48545.1 | Symbols: HINT3 | histidine triad nucleotide-binding 3 | chr5:19676228-19677945 FORWARD LENGTH=197	-0.215	-0.364	0.306	-0.16	0.00277	2.79	0.994	1.13	-0.443	1.11	0.928	1	0.924	1	1	0.0066	0.251	0.3	0.996	0.0899
TR15139|c1_g1_i7	AT5G48545.1 | Symbols: HINT3 | histidine triad nucleotide-binding 3 | chr5:19676228-19677945 FORWARD LENGTH=197	1.58	-0.316	1.05	0.239	0.608	1.84	0.307	0.221	-0.137	1.45	0.317	1	0.504	1	0.446	0.332	0.929	1	1	0.0494
TR15144|c2_g1_i5	AT2G29350.2 | Symbols: SAG13 | senescence-associated gene 13 | chr2:12601036-12601992 FORWARD LENGTH=225	-8.83	-2.09	-0.874	-5.26	-0.608	2.37	0.758	-1.07	2.52	0.164	0.0134	0.818	0.93	0.219	0.808	0.709	0.918	1	0.866	0.991
TR15160|c2_g2_i2	AT3G24170.3 | Symbols: ATGR1, GR1 | glutathione-disulfide reductase | chr3:8729762-8734115 REVERSE LENGTH=499	-2.4	-0.275	-0.599	-0.501	-1.03	-0.736	-0.435	0.011	-0.102	-0.209	0.0157	1	0.659	0.917	0.113	0.698	0.758	1	1	0.93
TR15164|c1_g1_i6	AT5G51960.1 | Symbols: | CONTAINS InterPro DOMAIN/s: Complex 1 LYR protein (InterPro:IPR008011); Has 45 Blast hits to 45 proteins in 14 species: Archae - 0; Bacteria - 0; Metazoa - 0; Fungi - 0; Plants - 45; Viruses - 0; Other Eukaryotes - 0 (source: NCBI BLink). | chr5:21110716-21111116 FORWARD LENGTH=103	2.37	0.76	-0.119	-0.00497	1.73	1.24	-0.0564	-0.00395	0.757	0.542	0.109	0.938	0.989	1	0.0188	0.628	0.995	1	0.897	0.813
TR15175|c0_g1_i1	AT4G31540.1 | Symbols: ATEXO70G1, EXO70G1 | exocyst subunit exo70 family protein G1 | chr4:15284739-15286802 REVERSE LENGTH=687	-2.42	-0.421	-0.319	-0.664	-1.01	-1.51	-0.11	-0.132	-0.223	-1.05	0.0275	1	0.919	0.816	0.114	0.287	0.975	1	1	0.116
TR15175|c0_g1_i3	AT4G31540.1 | Symbols: ATEXO70G1, EXO70G1 | exocyst subunit exo70 family protein G1 | chr4:15284739-15286802 REVERSE LENGTH=687	-2.15	-0.125	-0.379	-0.714	-0.927	-1.31	-0.0573	-0.115	0.0248	-1.16	0.0499	1	0.878	0.718	0.141	0.403	0.991	1	1	0.0572
TR15185|c1_g1_i1	AT3G60240.4 | Symbols: EIF4G, CUM2 | eukaryotic translation initiation factor 4G | chr3:22261842-22268295 FORWARD LENGTH=1727	-3.67	-0.685	-1.82	-0.62	-0.551	-0.987	-0.108	0.0321	-0.323	-0.588	0.0102	0.978	0.0958	1	0.611	0.738	0.985	1	1	0.79
TR15185|c1_g1_i3	AT3G60240.4 | Symbols: EIF4G, CUM2 | eukaryotic translation initiation factor 4G | chr3:22261842-22268295 FORWARD LENGTH=1727	-3.57	-0.705	-1.24	-0.403	-1.22	-1.44	-0.364	0.103	-0.544	-0.632	0.0146	0.977	0.439	1	0.172	0.572	0.914	1	1	0.764
TR15188|c0_g1_i1	AT5G17760.1 | Symbols: | P-loop containing nucleoside triphosphate hydrolases superfamily protein | chr5:5860591-5862301 REVERSE LENGTH=505	5.43	1.97	1.75	2.07	-0.357	2.65	0.359	-0.0884	1.06	1.32	0.0226	0.487	0.582	0.37	0.871	0.47	0.961	1	0.958	0.619
TR15188|c0_g1_i2	AT5G17760.1 | Symbols: | P-loop containing nucleoside triphosphate hydrolases superfamily protein | chr5:5860591-5862301 REVERSE LENGTH=505	5.51	1.43	1.89	1.88	0.319	1.47	-0.133	0.372	0.223	1	4.65e-05	0.424	0.145	0.1	0.803	0.609	0.984	1	1	0.547
TR15192|c2_g1_i1	AT1G16670.1 | Symbols: | Protein kinase superfamily protein | chr1:5697846-5699492 FORWARD LENGTH=390	2.35	0.526	0.454	0.664	0.706	0.589	0.124	-0.228	0.308	0.385	0.0137	0.956	0.808	0.663	0.23	0.776	0.969	1	1	0.797
TR15193|c3_g1_i3	AT4G19020.1 | Symbols: CMT2 | chromomethylase 2 | chr4:10414526-10420936 FORWARD LENGTH=1295	-0.922	-0.0186	-0.207	-0.332	-0.365	-2.42	-0.591	-0.717	-0.322	-0.789	0.573	1	0.956	1	0.747	0.0222	0.546	0.644	1	0.542
TR15207|c1_g1_i6	AT2G29690.1 | Symbols: ASA2, ATHANSYNAB | anthranilate synthase 2 | chr2:12693899-12696791 FORWARD LENGTH=621	2.45	1.22	0.586	0.169	0.472	3.27	0.278	0.0137	0.768	2.21	0.102	0.541	0.811	1	0.627	0.00752	0.926	1	0.832	0.000628
TR15209|c0_g2_i4	AT1G64980.1 | Symbols: | Nucleotide-diphospho-sugar transferases superfamily protein | chr1:24137840-24138619 REVERSE LENGTH=259	-0.675	-0.27	0.257	-0.0566	-0.605	-1.42	-0.211	-0.269	-0.515	-0.427	0.411	1	0.842	1	0.113	0.0256	0.857	1	0.512	0.495
TR15210|c3_g1_i4	AT1G14020.1 | Symbols: | O-fucosyltransferase family protein | chr1:4802930-4805111 FORWARD LENGTH=499	3.42	0.783	0.544	1.16	0.942	0.228	0.146	0.134	0.0966	-0.149	0.000344	0.741	0.779	0.219	0.113	0.953	0.968	1	1	0.962
TR15226|c1_g1_i12	AT5G06710.1 | Symbols: HAT14 | homeobox from Arabidopsis thaliana | chr5:2068305-2070284 REVERSE LENGTH=336	1.25	1.02	-0.953	0.265	0.914	3.38	1.44	1.38	0.073	0.481	0.586	0.896	0.739	1	0.296	0.0322	0.178	0.544	1	0.853
TR15228|c1_g1_i5	AT2G20680.1 | Symbols: MAN2, AtMAN2 | Glycosyl hydrolase superfamily protein | chr2:8921024-8923066 FORWARD LENGTH=433	-3.27	-0.836	-0.797	-0.426	-1.22	-2.57	-0.868	-0.458	-0.527	-0.721	0.00528	0.698	0.65	1	0.106	0.0367	0.375	1	0.973	0.61
TR15231|c0_g1_i5	AT3G21100.2 | Symbols: | RNA-binding (RRM/RBD/RNP motifs) family protein | chr3:7399162-7401870 FORWARD LENGTH=602	-1.42	-0.145	-0.453	-0.35	-0.471	-1.01	-0.391	-0.0735	-0.27	-0.278	0.0172	1	0.514	0.862	0.189	0.173	0.502	1	0.979	0.736
TR15237|c0_g4_i1	No informative hit E<10-6	-10.9	-1.74	-4.38	-1.27	-3.48	1.71	4.36	-2.01	-0.222	-0.418	0.0256	1	0.413	1	0.234	0.895	0.265	1	1	0.976
TR15248|c4_g2_i4	AT1G31360.1 | Symbols: RECQL2, ATRECQ2, MED34 | RECQ helicase L2 | chr1:11232422-11237412 FORWARD LENGTH=705	-1.78	-0.22	-0.734	-0.043	-0.782	-4.99	-0.186	-0.162	-3.62	-1.02	0.598	1	0.896	1	0.709	0.0296	0.983	1	0.00183	0.771
TR15252|c1_g2_i1	AT1G07080.1 | Symbols: | Thioredoxin superfamily protein | chr1:2170069-2171861 FORWARD LENGTH=265	-1.38	0.326	-0.457	-1.09	-0.162	-3.36	-1.1	-0.432	-1.08	-0.75	0.426	1	0.9	0.463	0.898	0.00672	0.298	1	0.512	0.607
TR15254|c2_g1_i3	AT3G20790.1 | Symbols: | NAD(P)-binding Rossmann-fold superfamily protein | chr3:7268802-7271099 FORWARD LENGTH=355	1.1	-0.151	0.37	-0.415	1.29	0.826	0.465	0.287	-0.0532	0.127	0.437	1	0.885	1	0.0216	0.685	0.769	1	1	0.968
TR15257|c1_g2_i3	AT5G50011.1 | Symbols: CPuORF37 | conserved peptide upstream open reading frame 37 | chr5:20349114-20349380 FORWARD LENGTH=51	-2.9	-0.325	-0.587	0.165	-2.15	-0.542	0.202	-0.228	-0.241	-0.275	0.0146	1	0.711	1	0.00661	0.816	0.933	1	1	0.913
TR15262|c0_g1_i2	AT4G27220.1 | Symbols: | NB-ARC domain-containing disease resistance protein | chr4:13633953-13636712 REVERSE LENGTH=919	2.96	0.574	0.666	1.28	0.44	0.215	0.0336	-0.382	0.04	0.524	0.031	1	0.782	0.324	0.664	0.969	0.998	1	1	0.821
TR15262|c0_g1_i6	AT4G27220.1 | Symbols: | NB-ARC domain-containing disease resistance protein | chr4:13633953-13636712 REVERSE LENGTH=919	3.96	1.16	1.01	0.674	1.12	1.04	0.136	-0.131	0.5	0.536	0.0305	0.809	0.719	1	0.375	0.775	0.985	1	1	0.861
TR15264|c1_g2_i3	AT4G39660.1 | Symbols: AGT2 | alanine:glyoxylate aminotransferase 2 | chr4:18406797-18409262 FORWARD LENGTH=476	0.0515	-0.122	0.23	0.23	-0.287	-1.84	-0.182	-0.389	-0.382	-0.891	0.986	1	0.89	1	0.541	0.0022	0.904	0.902	0.872	0.0108
TR15265|c2_g1_i1	AT5G47070.1 | Symbols: | Protein kinase superfamily protein | chr5:19118683-19120528 REVERSE LENGTH=410	2.34	0.407	0.753	0.626	0.555	0.549	-0.399	0.271	0.0516	0.626	0.0241	1	0.555	0.724	0.431	0.82	0.827	1	1	0.642
TR15276|c1_g1_i5	AT3G48200.1 | Symbols: | unknown protein; FUNCTIONS IN: molecular_function unknown; INVOLVED IN: biological_process unknown; LOCATED IN: endomembrane system; EXPRESSED IN: 21 plant structures; EXPRESSED DURING: 13 growth stages; Has 210 Blast hits to 148 proteins in 42 species: Archae - 0; Bacteria - 118; Metazoa - 0; Fungi - 0; Plants - 48; Viruses - 0; Other Eukaryotes - 44 (source: NCBI BLink)…	-1.3	0.111	-0.255	0.2	-1.36	0.351	0.335	-0.0908	0.176	-0.0694	0.368	1	0.95	1	0.032	0.919	0.886	1	1	0.99
TR15285|c0_g1_i1	AT5G67470.1 | Symbols: ATFH6, FH6 | formin homolog 6 | chr5:26926835-26930212 FORWARD LENGTH=899	-1.98	-0.38	-0.591	0.0587	-1.06	-0.86	-0.0083	0.102	-0.38	-0.573	0.012	0.985	0.554	1	0.0126	0.52	1	1	0.959	0.443
TR15288|c3_g3_i4	AT3G26710.1 | Symbols: CCB1 | cofactor assembly of complex C | chr3:9813550-9814606 FORWARD LENGTH=267	1.09	0.293	0.0327	0.0635	0.702	1.73	0.671	0.3	0.293	0.468	0.248	1	0.999	1	0.107	0.0456	0.304	1	1	0.597
TR15309|c4_g1_i6	AT1G26440.4 | Symbols: ATUPS5, UPS5 | ureide permease 5 | chr1:9144109-9145673 REVERSE LENGTH=351	4.56	0.516	1.1	0.737	2.2	-0.836	1.43	-0.936	-0.269	-1.06	0.00746	1	0.699	1	0.0147	0.849	0.273	0.969	1	0.574
TR15309|c4_g1_i7	AT2G03530.2 | Symbols: UPS2, ATUPS2 | ureide permease 2 | chr2:1071951-1073522 FORWARD LENGTH=398	2.86	0.406	0.347	-0.0502	2.15	-1.41	1.28	-0.768	-0.601	-1.32	0.186	1	0.963	1	0.0324	0.707	0.489	1	1	0.456
TR15310|c1_g1_i3	AT5G21160.1 | Symbols: | LA RNA-binding protein | chr5:7199191-7203879 REVERSE LENGTH=826	-1.02	-0.179	-0.161	0.146	-0.822	0.286	-0.17	0.289	0.127	0.0405	0.161	1	0.939	1	0.0146	0.862	0.909	1	1	0.988
TR15310|c1_g1_i9	AT5G21160.1 | Symbols: | LA RNA-binding protein | chr5:7199191-7203879 REVERSE LENGTH=826	-0.5	0.346	0.486	0.199	-1.53	1.03	-0.272	0.0244	0.0246	1.26	0.826	1	0.862	1	0.0319	0.688	0.938	1	1	0.188
TR15312|c7_g1_i4	AT1G66840.1 | Symbols: PMI2, WEB2 | Plant protein of unknown function (DUF827) | chr1:24933998-24936116 REVERSE LENGTH=607	0.189	-0.0325	0.472	0.0549	-0.306	1.58	0.413	0.657	-0.282	0.792	0.893	1	0.629	1	0.502	0.0293	0.617	0.426	1	0.0488
TR15313|c3_g1_i1	No informative hit E<10-6	2.91	0.844	0.328	-0.285	2.02	0.539	0.448	-0.842	0.392	0.541	0.0971	0.958	0.956	1	0.0163	0.907	0.902	0.966	1	0.849
TR15313|c3_g1_i4	No informative hit E<10-6	2.95	0.86	0.306	-0.195	1.98	0.417	0.456	-0.887	0.334	0.514	0.0862	0.948	0.96	1	0.0174	0.934	0.895	0.939	1	0.856
TR15313|c3_g1_i8	No informative hit E<10-6	2.51	0.624	0.341	-0.685	2.22	1.1	0.415	-0.341	0.312	0.709	0.0817	0.996	0.938	0.952	0.000703	0.676	0.881	1	1	0.668
TR15313|c3_g1_i9	No informative hit E<10-6	2.79	0.814	0.307	-0.29	1.96	0.578	0.489	-0.837	0.359	0.567	0.119	0.976	0.961	1	0.0217	0.899	0.888	0.968	1	0.839
TR15320|c3_g1_i2	AT5G58470.2 | Symbols: TAF15b | TBP-associated factor 15B | chr5:23638566-23640854 REVERSE LENGTH=422	-1.66	-0.219	-0.396	-0.261	-0.779	-0.23	-0.285	0.325	0.0208	-0.29	0.014	1	0.669	1	0.065	0.903	0.774	0.962	1	0.794
TR15322|c2_g4_i3	AT4G24190.1 | Symbols: SHD, HSP90.7, AtHsp90.7, AtHsp90-7 | Chaperone protein htpG family protein | chr4:12551902-12555851 REVERSE LENGTH=823	1.38	0.312	0.0377	0.371	0.663	1.59	0.837	-0.167	0.438	0.484	0.0809	1	0.997	0.954	0.109	0.0441	0.0498	1	0.856	0.522
TR15322|c2_g4_i4	AT4G24190.1 | Symbols: SHD, HSP90.7, AtHsp90.7, AtHsp90-7 | Chaperone protein htpG family protein | chr4:12551902-12555851 REVERSE LENGTH=823	0.364	-0.0493	-0.0149	0.45	-0.0225	1.64	0.974	-0.313	0.406	0.571	0.745	1	1	0.776	0.981	0.0146	0.0027	1	0.846	0.29
TR15324|c2_g1_i2	AT5G13180.1 | Symbols: ANAC083, VNI2, NAC083 | NAC domain containing protein 83 | chr5:4196643-4197577 FORWARD LENGTH=252	-0.701	0.331	-0.135	-0.133	-0.764	1.84	0.138	0.694	0.203	0.809	0.543	1	0.971	1	0.0877	0.0385	0.954	0.589	1	0.162
TR15324|c3_g1_i3	AT5G03300.1 | Symbols: ADK2 | adenosine kinase 2 | chr5:796573-798997 FORWARD LENGTH=345	-0.607	-0.0252	0.00645	0.0912	-0.68	-0.394	-0.0173	-0.0615	-0.0536	-0.261	0.447	1	1	1	0.0492	0.759	0.997	1	1	0.769
TR15327|c4_g1_i2	AT1G77060.1 | Symbols: | Phosphoenolpyruvate carboxylase family protein | chr1:28951804-28953449 REVERSE LENGTH=339	-2.18	-0.309	-0.577	0.52	-1.82	1.17	0.337	-0.0299	0.114	0.751	0.0818	1	0.788	1	0.00141	0.573	0.894	1	1	0.532
TR15344|c2_g1_i2	AT5G54690.1 | Symbols: GAUT12, LGT6, IRX8 | galacturonosyltransferase 12 | chr5:22219435-22221769 REVERSE LENGTH=535	-1.43	-0.259	-0.116	-0.102	-0.956	0.293	0.0896	0.222	-0.0351	0.0167	0.0851	1	0.974	1	0.0146	0.886	0.973	1	1	1
TR15350|c1_g1_i3	AT2G03220.1 | Symbols: FT1, ATFUT1, ATFT1, MUR2 | fucosyltransferase 1 | chr2:970401-972353 REVERSE LENGTH=558	0.559	0.581	-0.805	-1.55	2.33	-1.49	0.00955	-1.4	0.368	-0.459	0.893	1	0.869	0.609	0.0325	0.73	1	0.829	1	0.93
TR15351|c2_g1_i3	AT3G54790.2 | Symbols: | ARM repeat superfamily protein | chr3:20281830-20284255 REVERSE LENGTH=724	-4.27	-0.456	-1.34	-0.108	-2.37	-0.558	0.275	0.0171	-1.05	0.203	0.0462	1	0.538	1	0.107	0.913	0.955	1	0.89	0.969
TR15364|c0_g1_i4	No informative hit E<10-6	4.1	1.31	1.35	-0.185	1.63	-0.479	-0.231	-0.241	0.00168	-0.00838	0.0123	0.759	0.432	1	0.0813	0.912	0.959	1	1	1
TR15378|c0_g1_i1	AT2G38470.1 | Symbols: WRKY33, ATWRKY33 | WRKY DNA-binding protein 33 | chr2:16108476-16110539 FORWARD LENGTH=519	4.72	1.05	1.53	2	0.138	0.855	-0.168	0.672	-0.49	0.841	0.0223	0.958	0.523	0.345	0.953	0.869	0.984	1	1	0.792
TR15378|c1_g1_i1	AT2G38470.1 | Symbols: WRKY33, ATWRKY33 | WRKY DNA-binding protein 33 | chr2:16108476-16110539 FORWARD LENGTH=519	3.45	1.37	0.99	0.8	0.289	2.22	0.574	0.794	0.474	0.378	4.74e-05	0.0236	0.286	0.525	0.688	0.0275	0.629	0.6	0.953	0.8
TR15385|c0_g1_i11	AT4G25820.1 | Symbols: XTR9, XTH14, ATXTH14 | xyloglucan endotransglucosylase/hydrolase 14 | chr4:13130349-13131615 FORWARD LENGTH=287	-3.12	-0.0504	-0.377	-1.09	-1.6	-2.96	-1.16	-0.181	-1.03	-0.592	0.0211	1	0.934	0.496	0.02	0.0503	0.273	1	0.63	0.749
TR15385|c0_g1_i12	AT4G25820.1 | Symbols: XTR9, XTH14, ATXTH14 | xyloglucan endotransglucosylase/hydrolase 14 | chr4:13130349-13131615 FORWARD LENGTH=287	-3.23	0.105	-0.342	-1.26	-1.74	-1.4	-0.755	0.696	-1.14	-0.198	0.0175	1	0.945	0.361	0.0103	0.576	0.668	1	0.538	0.955
TR15385|c0_g1_i4	AT3G23730.1 | Symbols: XTH16 | xyloglucan endotransglucosylase/hydrolase 16 | chr3:8550222-8551248 FORWARD LENGTH=291	-2.26	0.133	0.142	-0.942	-1.59	-1.75	-1.06	0.0672	-0.777	0.024	0.0524	1	0.98	0.47	0.00363	0.255	0.191	1	0.722	1
TR15386|c0_g1_i4	AT1G26150.1 | Symbols: ATPERK10, PERK10 | proline-rich extensin-like receptor kinase 10 | chr1:9039790-9042873 REVERSE LENGTH=762	-2.86	-0.327	-1.12	0.0166	-1.43	-0.0247	0.0662	0.247	-0.435	0.0969	0.0064	1	0.242	1	0.0182	1	0.988	1	0.992	0.977
TR15410|c0_g1_i2	AT4G01070.1 | Symbols: GT72B1, UGT72B1 | UDP-Glycosyltransferase superfamily protein | chr4:461858-463300 REVERSE LENGTH=480	4.68	1.96	0.82	0.711	1.19	11.4	1.98	3.07	3.46	2.88	0.0259	0.333	0.857	1	0.378	2.77e-10	0.19	0.0375	0.0314	0.0648
TR15410|c0_g1_i4	AT4G01070.1 | Symbols: GT72B1, UGT72B1 | UDP-Glycosyltransferase superfamily protein | chr4:461858-463300 REVERSE LENGTH=480	7.11	2.92	1.91	1.17	1.11	9.77	2.27	2.06	3.52	1.93	0.00143	0.0743	0.504	0.981	0.497	3.87e-06	0.22	0.551	0.0962	0.424
TR15410|c0_g1_i5	AT2G15490.3 | Symbols: UGT73B4 | UDP-glycosyltransferase 73B4 | chr2:6761750-6763398 FORWARD LENGTH=481	4.08	2.34	-0.15	0.998	0.892	12.9	1.94	2.12	6.19	2.66	0.141	0.274	0.995	1	0.599	2e-08	0.372	0.549	0.00178	0.205
TR15432|c0_g2_i2	AT5G58110.1 | Symbols: | chaperone binding;ATPase activators | chr5:23515275-23516479 FORWARD LENGTH=196	1.48	0.477	0.353	-0.171	0.824	1.13	0.364	0.173	0.25	0.347	0.0764	0.879	0.833	1	0.0398	0.31	0.746	1	1	0.748
TR15432|c0_g2_i4	AT5G58110.1 | Symbols: | chaperone binding;ATPase activators | chr5:23515275-23516479 FORWARD LENGTH=196	0.807	0.373	-0.224	0.0551	0.603	1.82	0.741	0.208	0.165	0.701	0.475	0.999	0.938	1	0.211	0.0368	0.203	1	1	0.264
TR15432|c0_g2_i5	AT5G58110.1 | Symbols: | chaperone binding;ATPase activators | chr5:23515275-23516479 FORWARD LENGTH=196	1.28	0.264	0.0565	0.0485	0.915	1.92	1.08	-0.0973	0.0608	0.883	0.2	1	0.994	1	0.0419	0.0359	0.0213	1	1	0.112
TR15436|c1_g1_i4	AT1G72070.1 | Symbols: | Chaperone DnaJ-domain superfamily protein | chr1:27118851-27119608 REVERSE LENGTH=126	3.38	1.38	1.26	0.172	0.564	1.97	1.28	0.233	-0.302	0.755	0.0171	0.447	0.413	1	0.534	0.368	0.347	1	1	0.647
TR15442|c0_g2_i6	AT3G22550.1 | Symbols: | Protein of unknown function (DUF581) | chr3:7991827-7992805 REVERSE LENGTH=267	-0.885	-0.343	0.597	-0.707	-0.433	-2.25	-0.82	-1.07	-0.325	-0.0319	0.539	1	0.714	0.683	0.544	0.037	0.375	0.232	1	0.997
TR15448|c0_g3_i3	No informative hit E<10-6	2.68	0.626	1.62	-0.533	0.962	3.66	0.352	-0.948	0.516	3.74	0.417	1	0.668	1	0.598	0.369	0.965	1	1	0.035
TR15453|c3_g1_i4	No informative hit E<10-6	3.67	1.53	0.518	0.43	1.19	1.07	0.312	0.0706	0.288	0.399	0.000886	0.0883	0.824	1	0.114	0.635	0.916	1	1	0.875
TR15453|c3_g1_i8	No informative hit E<10-6	2.65	0.932	0.568	0.447	0.702	1.79	0.341	0.267	0.222	0.959	0.0232	0.629	0.751	0.981	0.431	0.224	0.873	1	1	0.463
TR15455|c1_g2_i2	AT2G34560.1 | Symbols: | P-loop containing nucleoside triphosphate hydrolases superfamily protein | chr2:14560266-14562695 FORWARD LENGTH=384	1.96	0.454	0.435	0.401	0.667	1.36	-0.393	0.0117	0.392	1.35	0.111	1	0.848	1	0.409	0.448	0.853	1	1	0.0497
TR15464|c1_g1_i1	AT2G21160.2 | Symbols: | Translocon-associated protein (TRAP), alpha subunit | chr2:9068428-9070310 FORWARD LENGTH=188	-1.1	-0.202	0.0102	0.02	-0.93	-0.0572	0.0447	-0.00392	-0.0711	-0.0269	0.183	1	1	1	0.0137	0.992	0.99	1	1	0.995
TR15472|c0_g1_i13	AT1G14310.1 | Symbols: | Haloacid dehalogenase-like hydrolase (HAD) superfamily protein | chr1:4885049-4886672 FORWARD LENGTH=254	-1.09	0.0887	0.182	0.291	-1.66	-1.47	-0.671	-0.0825	-0.3	-0.421	0.608	1	0.98	1	0.0405	0.571	0.771	1	1	0.882
TR15492|c1_g1_i1	AT1G02850.2 | Symbols: BGLU11 | beta glucosidase 11 | chr1:630569-633085 FORWARD LENGTH=497	-3.56	0.439	0.557	-0.34	-4.22	-3.26	0.0878	-2.34	-1.96	0.952	0.365	1	0.963	1	0.0217	0.504	0.997	0.705	0.78	0.851
TR15492|c1_g1_i10	AT1G02850.3 | Symbols: BGLU11 | beta glucosidase 11 | chr1:630569-633085 FORWARD LENGTH=473	-8.15	-1.28	-0.96	-1.06	-4.86	0.0127	-0.462	0.775	-0.841	0.54	0.0156	1	0.92	1	0.0212	1	0.961	1	1	0.94
TR15493|c2_g2_i10	AT1G14350.2 | Symbols: FLP, MYB124 | Duplicated homeodomain-like superfamily protein | chr1:4908427-4910647 FORWARD LENGTH=436	-2.19	-0.105	0.387	0.318	-2.79	-0.641	0.615	-0.108	-0.687	-0.461	0.373	1	0.947	1	0.0304	0.87	0.791	1	0.95	0.883
TR15496|c2_g1_i6	AT4G15520.1 | Symbols: | tRNA/rRNA methyltransferase (SpoU) family protein | chr4:8862829-8864366 FORWARD LENGTH=222	-5.58	-1.91	-0.579	-0.476	-2.61	1	0.833	0.407	-0.219	-0.0185	0.00497	0.608	0.908	1	0.027	0.793	0.715	1	1	1
TR15511|c3_g2_i1	AT1G43690.1 | Symbols: | ubiquitin interaction motif-containing protein | chr1:16478519-16482589 FORWARD LENGTH=599	-13.1	-6.67	0.0258	-4.61	-1.8	1.29	-0.0557	0.861	1.12	-0.632	0.00147	0.0751	1	0.289	0.517	0.896	1	1	1	0.942
TR15512|c0_g1_i1	AT1G20720.1 | Symbols: | RAD3-like DNA-binding helicase protein | chr1:7185658-7192794 REVERSE LENGTH=1175	1.96	-0.112	0.0329	0.405	1.63	-0.713	-0.19	-0.0243	-0.0856	-0.413	0.182	1	1	1	0.0331	0.798	0.954	1	1	0.868
TR15512|c0_g1_i2	AT1G20720.1 | Symbols: | RAD3-like DNA-binding helicase protein | chr1:7185658-7192794 REVERSE LENGTH=1175	1.23	-0.381	0.167	-0.294	1.73	-0.549	-0.263	-0.18	0.183	-0.289	0.511	1	0.978	1	0.0219	0.876	0.936	1	1	0.935
TR15512|c0_g1_i3	AT1G20750.1 | Symbols: | RAD3-like DNA-binding helicase protein | chr1:7203302-7208998 REVERSE LENGTH=1144	1.82	-0.158	0.422	0.0847	1.47	-0.35	-0.104	-0.0405	0.0668	-0.273	0.221	1	0.88	1	0.046	0.926	0.982	1	1	0.931
TR15512|c0_g1_i4	AT1G20750.1 | Symbols: | RAD3-like DNA-binding helicase protein | chr1:7203302-7208998 REVERSE LENGTH=1144	2.06	0.223	0.379	-0.29	1.75	-0.0128	-0.0851	-0.157	-0.292	0.521	0.145	1	0.896	1	0.0158	1	0.986	1	1	0.84
TR15512|c0_g1_i5	AT1G20720.1 | Symbols: | RAD3-like DNA-binding helicase protein | chr1:7185658-7192794 REVERSE LENGTH=1175	1.46	-0.546	0.0267	0.0291	1.95	-0.4	-0.323	-0.132	0.0744	-0.0206	0.408	1	1	1	0.00988	0.919	0.912	1	1	1
TR15515|c0_g3_i5	AT4G36210.3 | Symbols: | Protein of unknown function (DUF726) | chr4:17130354-17134302 FORWARD LENGTH=672	-2.61	-0.53	-0.346	-0.394	-1.34	-0.0321	0.146	0.461	-0.3	-0.34	0.0256	0.977	0.907	1	0.0666	1	0.965	1	1	0.866
TR15519|c3_g1_i1	AT4G34110.1 | Symbols: PAB2, PABP2, ATPAB2 | poly(A) binding protein 2 | chr4:16336732-16339892 FORWARD LENGTH=629	1.16	0.0506	0.299	-0.0318	0.847	0.466	0.134	-0.166	-0.0618	0.56	0.203	1	0.868	1	0.0448	0.799	0.954	1	1	0.464
TR15523|c5_g1_i6	No informative hit E<10-6	-4.64	-1.09	-1.84	-0.358	-1.35	-2.05	0.285	0.276	-2.09	-0.519	0.00265	0.83	0.162	1	0.163	0.48	0.957	1	0.0962	0.885
TR15525|c2_g1_i4	AT1G21230.1 | Symbols: WAK5 | wall associated kinase 5 | chr1:7429980-7432346 FORWARD LENGTH=733	2.85	-0.0901	2.25	1.4	-0.718	5.05	1.57	1.68	1.01	0.783	0.432	1	0.319	0.735	0.729	0.0345	0.613	0.616	0.949	0.842
TR15537|c0_g2_i1	AT2G39830.1 | Symbols: DAR2 | DA1-related protein 2 | chr2:16619950-16623658 REVERSE LENGTH=528	-1.96	-0.104	-0.265	-0.338	-1.25	-1.56	-0.507	-0.0931	-0.472	-0.483	0.0999	1	0.946	1	0.029	0.339	0.776	1	0.988	0.756
TR15537|c0_g2_i11	AT2G39830.1 | Symbols: DAR2 | DA1-related protein 2 | chr2:16619950-16623658 REVERSE LENGTH=528	-2.15	0.232	-0.201	-0.588	-1.6	-1.43	-0.356	-0.283	-0.21	-0.578	0.0999	1	0.968	0.937	0.0135	0.475	0.897	1	1	0.717
TR15537|c0_g2_i2	AT2G39830.1 | Symbols: DAR2 | DA1-related protein 2 | chr2:16619950-16623658 REVERSE LENGTH=528	-1.46	0.583	-0.239	-0.227	-1.57	-1.52	-0.724	-0.562	-0.474	0.24	0.454	1	0.97	1	0.048	0.559	0.766	1	1	0.947
TR15537|c0_g2_i3	AT2G39830.1 | Symbols: DAR2 | DA1-related protein 2 | chr2:16619950-16623658 REVERSE LENGTH=528	-2.58	-0.266	-0.402	-0.558	-1.35	-1.75	-0.438	-0.116	-0.282	-0.91	0.00579	1	0.859	0.83	0.00703	0.133	0.778	1	1	0.158
TR15540|c2_g4_i1	AT5G65380.1 | Symbols: | MATE efflux family protein | chr5:26123241-26126352 REVERSE LENGTH=486	1.52	0.384	0.541	0.766	-0.168	2.29	0.933	0.378	0.82	0.164	0.156	1	0.728	0.733	0.811	0.0363	0.147	1	0.74	0.939
TR15540|c2_g4_i2	AT5G65380.1 | Symbols: | MATE efflux family protein | chr5:26123241-26126352 REVERSE LENGTH=486	1.67	0.206	0.329	1.38	-0.243	2.78	0.88	0.487	1.34	0.0763	0.135	1	0.9	0.107	0.733	0.00656	0.244	1	0.224	0.981
TR15545|c3_g1_i4	AT2G45670.1 | Symbols: | calcineurin B subunit-related | chr2:18815070-18818382 REVERSE LENGTH=539	-2.11	-0.486	-0.19	-0.204	-1.23	0.174	0.456	0.132	-0.0596	-0.354	0.0713	0.996	0.966	1	0.0331	0.966	0.781	1	1	0.845
TR15548|c4_g1_i6	AT1G10650.1 | Symbols: | SBP (S-ribonuclease binding protein) family protein | chr1:3524122-3525318 REVERSE LENGTH=339	-1.08	0.0892	-0.763	-0.399	-0.0118	0.28	1.13	-0.456	-0.227	-0.169	0.353	1	0.485	0.999	0.996	0.921	0.0379	0.997	1	0.942
TR15554|c2_g2_i9	AT5G38600.1 | Symbols: | Proline-rich spliceosome-associated (PSP) family protein / zinc knuckle (CCHC-type) family protein | chr5:15457386-15460466 FORWARD LENGTH=532	0.95	-0.0234	0.0125	-0.306	1.27	-0.864	-0.416	-0.314	-0.106	-0.0263	0.449	1	1	1	0.00729	0.624	0.786	1	1	0.998
TR16245|c1_g1_i1	AT3G43230.1 | Symbols: | RING/FYVE/PHD-type zinc finger family protein | chr3:15207776-15209599 FORWARD LENGTH=485	-5.18	-0.124	-3.41	-2.5	0.853	15.9	2.97	3.09	7.81	2.03	0.419	1	0.758	1	0.889	0.022	0.747	0.991	0.324	0.854
TR16260|c0_g1_i4	AT5G51040.1 | Symbols: | unknown protein; CONTAINS InterPro DOMAIN/s: Protein of unknown function DUF339 (InterPro:IPR005631); Has 532 Blast hits to 532 proteins in 207 species: Archae - 0; Bacteria - 285; Metazoa - 16; Fungi - 41; Plants - 40; Viruses - 0; Other Eukaryotes - 150 (source: NCBI BLink). | chr5:20750700-20751790 FORWARD LENGTH=188	1.91	0.337	0.724	0.327	0.525	1.4	0.574	0.341	-0.202	0.687	0.042	1	0.498	1	0.347	0.273	0.568	1	1	0.393
TR16260|c0_g1_i6	AT5G51040.1 | Symbols: | unknown protein; CONTAINS InterPro DOMAIN/s: Protein of unknown function DUF339 (InterPro:IPR005631); Has 532 Blast hits to 532 proteins in 207 species: Archae - 0; Bacteria - 285; Metazoa - 16; Fungi - 41; Plants - 40; Viruses - 0; Other Eukaryotes - 150 (source: NCBI BLink). | chr5:20750700-20751790 FORWARD LENGTH=188	2.23	0.554	0.693	0.0759	0.905	1.4	0.603	0.192	0.236	0.371	0.000668	0.671	0.334	1	0.0137	0.101	0.301	1	1	0.683
TR16269|c0_g3_i1	No informative hit E<10-6	-3.18	0.504	-0.632	-0.25	-2.8	0.371	-0.305	0.465	0.415	-0.205	0.191	1	0.9	1	0.0498	0.952	0.95	1	1	0.971
TR16276|c0_g1_i1	AT5G02790.1 | Symbols: GSTL3 | Glutathione S-transferase family protein | chr5:632877-634858 FORWARD LENGTH=235	12	2.59	2.38	4.52	2.49	18.8	7.64	3.9	3.78	3.47	8.71e-11	0.0712	0.227	0.00651	0.0262	4.31e-20	7.63e-07	0.00751	0.00629	0.00442
TR16276|c0_g1_i2	AT5G02790.1 | Symbols: GSTL3 | Glutathione S-transferase family protein | chr5:632877-634858 FORWARD LENGTH=235	8.25	2.49	2.72	1.85	1.18	12.2	2.44	3.8	3.37	2.6	0.000713	0.332	0.241	0.849	0.478	2.3e-08	0.223	0.0754	0.0834	0.22
TR16276|c0_g1_i3	AT5G02790.1 | Symbols: GSTL3 | Glutathione S-transferase family protein | chr5:632877-634858 FORWARD LENGTH=235	7.27	2.93	2.25	2.85	-0.75	14.7	5.34	3.72	3.27	2.39	0.00764	0.244	0.534	0.369	0.696	1.64e-10	0.000718	0.109	0.158	0.277
TR16276|c1_g3_i2	AT5G02790.1 | Symbols: GSTL3 | Glutathione S-transferase family protein | chr5:632877-634858 FORWARD LENGTH=235	8.43	3.26	2.22	2.28	0.674	16.8	7.15	3.28	4.52	1.8	0.0248	0.356	0.724	0.934	0.801	4.07e-08	0.0015	0.44	0.151	0.657
TR16279|c0_g2_i1	AT1G28110.2 | Symbols: SCPL45 | serine carboxypeptidase-like 45 | chr1:9804153-9806832 REVERSE LENGTH=461	-0.387	0.548	-0.0628	-0.403	-0.469	-1.91	-0.483	-0.276	-0.4	-0.747	0.809	0.89	0.994	0.991	0.442	0.0412	0.654	1	0.978	0.278
TR16279|c0_g2_i10	AT1G28110.2 | Symbols: SCPL45 | serine carboxypeptidase-like 45 | chr1:9804153-9806832 REVERSE LENGTH=461	0.731	0.431	0.125	0.0252	0.151	-1.82	-0.527	-0.0651	-0.371	-0.855	0.536	0.97	0.975	1	0.838	0.0415	0.562	1	0.986	0.12
TR16279|c0_g2_i5	AT1G28110.2 | Symbols: SCPL45 | serine carboxypeptidase-like 45 | chr1:9804153-9806832 REVERSE LENGTH=461	-0.326	0.269	-0.0769	-0.227	-0.29	-2.09	-0.447	-0.354	-0.556	-0.734	0.82	1	0.989	1	0.628	0.00362	0.621	1	0.678	0.182
TR16285|c6_g1_i8	AT1G68590.1 | Symbols: | Ribosomal protein PSRP-3/Ycf65 | chr1:25757593-25758169 REVERSE LENGTH=166	2.43	0.844	0.404	0.114	1.06	0.811	0.605	-0.482	0.223	0.465	0.027	0.659	0.874	1	0.0659	0.715	0.661	1	1	0.77
TR16296|c2_g2_i3	AT5G67385.1 | Symbols: | Phototropic-responsive NPH3 family protein | chr5:26884754-26887083 FORWARD LENGTH=604	-2.78	-1.1	-0.772	-0.0668	-0.843	-0.571	-0.0633	-0.218	-0.0677	-0.222	0.0256	0.429	0.681	1	0.246	0.838	0.992	1	1	0.931
TR16300|c3_g1_i1	AT1G77800.2 | Symbols: | PHD finger family protein | chr1:29253800-29260190 FORWARD LENGTH=1374	-3.65	-0.566	-1.6	-0.26	-1.22	-1.52	-0.305	-0.0989	-0.577	-0.539	0.0104	1	0.19	1	0.154	0.529	0.935	1	1	0.817
TR16300|c3_g1_i2	AT1G77800.2 | Symbols: | PHD finger family protein | chr1:29253800-29260190 FORWARD LENGTH=1374	-2.86	-0.645	-1.22	-0.359	-0.634	-1.42	-0.529	-0.0119	-0.372	-0.509	0.0482	0.985	0.41	1	0.52	0.535	0.811	1	1	0.823
TR16331|c1_g1_i6	AT1G23170.1 | Symbols: | Protein of unknown function DUF2359, transmembrane | chr1:8212724-8215516 FORWARD LENGTH=569	2	0.669	0.525	0.198	0.611	0.556	0.106	0.426	0.0336	-0.0101	0.0497	0.761	0.742	1	0.351	0.807	0.975	1	1	1
TR16335|c2_g1_i7	AT2G35490.1 | Symbols: | Plastid-lipid associated protein PAP / fibrillin family protein | chr2:14912309-14913797 REVERSE LENGTH=376	2.14	0.573	0.279	-0.267	1.55	0.84	0.541	0.0262	-0.0132	0.286	0.0671	0.957	0.938	1	0.00485	0.705	0.73	1	1	0.897
TR16359|c2_g1_i1	AT2G21650.1 | Symbols: MEE3, ATRL2, RSM1 | Homeodomain-like superfamily protein | chr2:9259654-9260419 FORWARD LENGTH=101	-3.48	-0.656	-0.589	-1.12	-1.11	-1.66	-0.689	0.159	-0.483	-0.65	3.27e-05	0.814	0.706	0.152	0.0269	0.194	0.491	1	0.958	0.508
TR16360|c2_g1_i2	AT2G38280.2 | Symbols: FAC1, ATAMPD | AMP deaminase, putative / myoadenylate deaminase, putative | chr2:16033767-16038793 REVERSE LENGTH=839	-2.37	-0.638	-0.387	-0.0359	-1.31	-0.776	-0.298	0.207	-0.16	-0.525	0.0108	0.767	0.834	1	0.0191	0.66	0.869	1	1	0.646
TR16374|c2_g1_i6	AT1G55300.2 | Symbols: TAF7 | TBP-associated factor 7 | chr1:20628154-20629490 REVERSE LENGTH=239	0.247	-0.245	0.274	-0.732	0.949	1.21	0.365	0.121	0.448	0.277	0.859	1	0.878	0.339	0.00935	0.221	0.729	1	0.842	0.819
TR16387|c0_g1_i6	AT3G28720.1 | Symbols: | unknown protein; FUNCTIONS IN: molecular_function unknown; INVOLVED IN: biological_process unknown; LOCATED IN: cellular_component unknown; EXPRESSED IN: 25 plant structures; EXPRESSED DURING: 13 growth stages; BEST Arabidopsis thaliana protein match is: unknown protein (TAIR:AT5G58100.1); Has 1610 Blast hits to 344 proteins in 85 species: Archae - 0; Bacteria - 567; Meta…	-2.56	-0.219	-0.827	-0.364	-1.15	-0.904	-0.512	0.357	-0.471	-0.279	0.0386	1	0.534	1	0.178	0.659	0.707	1	0.991	0.907
TR16389|c0_g1_i3	AT4G17640.2 | Symbols: CKB2 | casein kinase II beta chain 2 | chr4:9825438-9826988 FORWARD LENGTH=277	1.52	0.41	0.511	0.127	0.473	0.442	0.484	-0.175	0.037	0.096	0.0401	0.933	0.586	1	0.277	0.783	0.508	1	1	0.962
TR16402|c0_g2_i1	AT4G29680.1 | Symbols: | Alkaline-phosphatase-like family protein | chr4:14538067-14539557 REVERSE LENGTH=496	1.59	0.22	0.183	-0.0234	1.21	0.305	0.8	-0.46	-0.256	0.22	0.218	1	0.969	1	0.0439	0.93	0.429	1	1	0.933
TR16410|c0_g1_i4	AT5G16070.1 | Symbols: | TCP-1/cpn60 chaperonin family protein | chr5:5247549-5251050 REVERSE LENGTH=535	-2.65	-1.24	-1.77	-0.595	0.95	7.93	2.84	0.253	4.14	0.706	0.571	1	0.768	1	0.7	0.0233	0.339	1	0.187	0.923
TR16420|c1_g2_i5	AT4G34440.1 | Symbols: | Protein kinase superfamily protein | chr4:16466008-16468748 FORWARD LENGTH=670	2.5	0.691	-0.431	0.487	1.75	-1.61	-0.723	-0.525	-0.0663	-0.293	0.174	1	0.928	1	0.0402	0.557	0.78	1	1	0.94
TR16446|c2_g1_i1	AT1G44446.1 | Symbols: CH1, ATCAO, CAO | Pheophorbide a oxygenase family protein with Rieske [2Fe-2S] domain | chr1:16848664-16851152 REVERSE LENGTH=536	-1.8	-0.122	-0.367	-0.369	-0.945	-1.11	-0.121	-0.17	-0.913	0.0937	0.0306	1	0.819	1	0.0229	0.367	0.962	1	0.232	0.968
TR16446|c2_g1_i2	AT1G44446.1 | Symbols: CH1, ATCAO, CAO | Pheophorbide a oxygenase family protein with Rieske [2Fe-2S] domain | chr1:16848664-16851152 REVERSE LENGTH=536	-1.85	-0.31	-0.385	-0.435	-0.724	-0.71	-0.00251	0.0968	-0.724	-0.0809	0.0292	1	0.808	0.959	0.109	0.657	1	1	0.513	0.976
TR16463|c2_g3_i3	AT1G76340.1 | Symbols: GONST3 | golgi nucleotide sugar transporter 3 | chr1:28635188-28636306 REVERSE LENGTH=372	1.88	0.186	0.364	-0.524	1.86	2.29	0.832	-0.342	0.802	1	0.357	1	0.953	1	0.0255	0.335	0.724	1	0.949	0.561
TR16472|c1_g1_i2	AT5G13070.1 | Symbols: | MSF1-like family protein | chr5:4148216-4149062 FORWARD LENGTH=183	1.89	0.337	0.358	0.245	0.954	0.512	0.147	-0.434	0.0271	0.772	0.0337	1	0.848	1	0.0393	0.801	0.954	0.984	1	0.258
TR16473|c0_g1_i2	AT3G54460.1 | Symbols: | SNF2 domain-containing protein / helicase domain-containing protein / F-box family protein | chr3:20162050-20167186 REVERSE LENGTH=1378	-2.68	-0.679	-1.23	0.081	-0.845	-1.68	-0.159	-0.449	-0.728	-0.342	0.0185	0.829	0.155	1	0.256	0.262	0.962	1	0.794	0.867
TR16474|c2_g1_i1	AT4G03390.1 | Symbols: SRF3 | STRUBBELIG-receptor family 3 | chr4:1490912-1494553 REVERSE LENGTH=776	0.0422	-0.189	0.277	-0.000706	-0.0454	-2.46	-1.81	-0.216	-0.234	-0.2	1	1	0.931	1	0.973	0.0226	0.000129	1	1	0.943
TR16474|c2_g1_i7	AT4G03390.1 | Symbols: SRF3 | STRUBBELIG-receptor family 3 | chr4:1490912-1494553 REVERSE LENGTH=776	-1.24	-0.659	-0.512	0.12	-0.19	-2.02	-1.68	0.12	0.235	-0.7	0.331	0.842	0.758	1	0.846	0.0718	0.000168	1	1	0.523
TR16478|c1_g1_i2	AT5G26860.1 | Symbols: LON_ARA_ARA, LON1 | lon protease 1 | chr5:9451183-9456631 FORWARD LENGTH=940	-0.0121	0.0991	-0.0278	0.144	-0.227	1.96	0.26	0.381	0.91	0.406	1	1	1	1	0.723	0.0197	0.877	1	0.209	0.715
TR16479|c4_g1_i9	AT1G68010.1 | Symbols: HPR, ATHPR1 | hydroxypyruvate reductase | chr1:25493418-25495720 FORWARD LENGTH=386	0.766	-0.328	-0.0297	0.0691	1.05	2.78	0.592	0.898	0.0458	1.24	0.702	1	1	1	0.139	0.044	0.768	0.786	1	0.151
TR16497|c2_g4_i1	AT1G09620.1 | Symbols: | ATP binding;leucine-tRNA ligases;aminoacyl-tRNA ligases;nucleotide binding;ATP binding;aminoacyl-tRNA ligases | chr1:3113077-3116455 REVERSE LENGTH=1091	-1.43	-0.0904	-0.14	-0.118	-1.08	-0.178	-0.335	0.122	0.211	-0.176	0.0809	1	0.962	1	0.00778	0.942	0.771	1	1	0.914
TR16501|c2_g2_i3	No informative hit E<10-6	-1.93	-0.443	-0.481	-0.843	-0.166	0.0129	1.07	0.655	0.0225	-1.73	0.278	1	0.908	0.866	0.903	1	0.477	1	1	0.0393
TR16506|c0_g1_i2	AT5G67280.1 | Symbols: RLK | receptor-like kinase | chr5:26842430-26845126 REVERSE LENGTH=751	-3.48	-0.559	-0.914	-0.311	-1.7	0.212	0.262	0.761	-0.526	-0.285	0.0354	1	0.647	1	0.168	0.968	0.94	0.926	1	0.925
TR16509|c0_g2_i8	AT4G31940.1 | Symbols: CYP82C4 | cytochrome P450, family 82, subfamily C, polypeptide 4 | chr4:15452040-15453966 FORWARD LENGTH=524	-5.63	-1.59	-1.81	-1.27	-0.953	3	0.0234	-0.587	3.34	0.22	0.0189	0.706	0.539	0.995	0.502	0.488	1	1	0.341	0.972
TR16514|c2_g3_i2	No informative hit E<10-6	-1.37	0.0275	-0.204	-0.0717	-1.13	-1.03	0.125	-0.216	-0.472	-0.47	0.267	1	0.96	1	0.044	0.552	0.97	1	0.969	0.729
TR16523|c2_g1_i2	AT4G34131.1 | Symbols: UGT73B3 | UDP-glucosyl transferase 73B3 | chr4:16343268-16344713 REVERSE LENGTH=481	-1.43	0.0577	-0.92	0.742	-1.31	-4.59	0.157	-2.15	0.0138	-2.61	0.523	1	0.73	1	0.118	0.00062	0.977	0.0323	1	0.000145
TR16523|c2_g1_i3	AT4G34131.1 | Symbols: UGT73B3 | UDP-glucosyl transferase 73B3 | chr4:16343268-16344713 REVERSE LENGTH=481	-1.11	-0.1	-0.588	0.635	-1.06	-5.01	-0.144	-2.16	-0.0897	-2.62	0.738	1	0.922	1	0.396	0.0122	0.987	0.283	1	0.0188
TR16523|c2_g1_i4	AT4G34131.1 | Symbols: UGT73B3 | UDP-glucosyl transferase 73B3 | chr4:16343268-16344713 REVERSE LENGTH=481	-0.953	0.099	-0.94	0.969	-1.08	-5.32	-0.0885	-2.46	0.108	-2.88	0.749	1	0.767	0.962	0.305	0.000665	0.992	0.0394	1	0.000594
TR16523|c2_g1_i5	AT4G34131.1 | Symbols: UGT73B3 | UDP-glucosyl transferase 73B3 | chr4:16343268-16344713 REVERSE LENGTH=481	-1.44	-0.487	-0.967	0.777	-0.766	-5.57	-0.356	-2.22	-0.117	-2.88	0.613	1	0.786	1	0.551	0.0015	0.946	0.188	1	0.00328
TR16524|c3_g2_i1	AT1G10680.1 | Symbols: PGP10 | P-glycoprotein 10 | chr1:3538470-3543782 REVERSE LENGTH=1227	0.834	-0.222	0.252	-0.0987	0.903	0.3	0.414	-0.418	0.00307	0.301	0.328	1	0.878	1	0.00918	0.868	0.604	0.89	1	0.759
TR16528|c1_g3_i8	AT5G56590.1 | Symbols: | O-Glycosyl hydrolases family 17 protein | chr5:22907521-22909436 FORWARD LENGTH=506	-0.166	-0.174	-0.297	-0.137	0.442	0.147	-0.19	-0.261	-0.398	0.997	0.932	1	0.887	1	0.448	0.96	0.926	1	0.945	0.0309
TR16534|c1_g4_i6	AT5G46400.1 | Symbols: AT PRP39-2, PRP39-2 | Tetratricopeptide repeat (TPR)-like superfamily protein | chr5:18820032-18824522 FORWARD LENGTH=1036	-1.99	-0.539	-0.506	-0.0233	-0.917	0.539	-0.0557	0.0875	0.219	0.288	0.0243	0.844	0.704	1	0.0892	0.755	0.987	1	1	0.853
TR16539|c2_g3_i1	AT2G37170.1 | Symbols: PIP2B, PIP2;2 | plasma membrane intrinsic protein 2 | chr2:15613624-15614791 REVERSE LENGTH=285	-1.11	0.377	-0.138	-0.82	-0.531	1.67	1.52	0.0477	0.211	-0.116	0.55	1	0.986	0.877	0.543	0.432	0.049	1	1	0.979
TR16543|c2_g2_i2	AT3G04980.1 | Symbols: | DNAJ heat shock N-terminal domain-containing protein | chr3:1378684-1382181 REVERSE LENGTH=1165	-11.2	0.198	-1.32	-3.47	-6.57	-7.22	-1.61	-1.83	-1.49	-2.29	0.0458	1	0.922	0.786	0.0828	0.282	0.854	1	1	0.732
TR17090|c1_g1_i1	AT5G22090.2 | Symbols: | Protein of unknown function (DUF3049) | chr5:7315003-7316394 REVERSE LENGTH=463	-3.3	0.0685	-0.568	-1.01	-1.79	-3.37	0.172	-0.0897	-1.4	-2.05	0.00584	1	0.826	0.504	0.00515	0.00472	0.967	1	0.165	0.000488
TR17090|c1_g1_i2	AT5G22090.2 | Symbols: | Protein of unknown function (DUF3049) | chr5:7315003-7316394 REVERSE LENGTH=463	-1.83	-0.109	-0.0905	-1.03	-0.592	-2.28	0.301	-0.266	-0.59	-1.72	0.111	1	0.99	0.314	0.359	0.043	0.896	1	0.894	0.000305
TR17090|c1_g1_i3	AT5G22090.2 | Symbols: | Protein of unknown function (DUF3049) | chr5:7315003-7316394 REVERSE LENGTH=463	-5.3	-0.524	-1.28	-0.477	-3.01	-2.69	-0.0391	-1.52	-0.103	-1.04	0.0463	1	0.803	1	0.0426	0.478	1	0.853	1	0.743
TR17093|c1_g1_i1	AT5G45140.1 | Symbols: NRPC2 | nuclear RNA polymerase C2 | chr5:18247416-18257713 REVERSE LENGTH=1161	-2.21	-0.633	-0.235	-0.173	-1.17	-0.268	-0.486	0.277	0.173	-0.232	0.026	0.719	0.932	1	0.0793	0.919	0.623	1	1	0.91
TR17104|c0_g1_i1	AT1G26800.1 | Symbols: | RING/U-box superfamily protein | chr1:9285576-9286190 REVERSE LENGTH=204	1.69	-0.371	0.703	-0.19	1.55	1.24	0.0164	0.494	-0.0555	0.782	0.165	1	0.625	1	0.00312	0.488	1	0.999	1	0.403
TR17104|c0_g1_i4	AT1G26800.1 | Symbols: | RING/U-box superfamily protein | chr1:9285576-9286190 REVERSE LENGTH=204	4.02	0.669	1.1	0.839	1.41	2.25	0.25	-0.25	1.14	1.11	0.0429	1	0.699	1	0.2	0.52	0.972	1	0.958	0.608
TR17128|c2_g3_i2	AT5G23860.2 | Symbols: TUB8 | tubulin beta 8 | chr5:8042962-8044528 FORWARD LENGTH=449	-1.34	-0.199	-0.251	-0.0548	-0.835	-0.348	-0.756	0.162	-0.125	0.371	0.121	1	0.903	1	0.0429	0.865	0.167	1	1	0.729
TR17129|c3_g1_i2	No informative hit E<10-6	-14.3	-5.88	-0.345	-2.76	-5.35	2.49	0.016	1.05	-0.594	2.01	0.000159	0.0722	0.99	0.735	0.0268	0.776	1	1	1	0.722
TR17129|c3_g1_i3	No informative hit E<10-6	-22.6	-8.8	-4.66	-3.02	-6.15	5.99	-0.797	3.9	0.628	2.25	0.000603	0.263	0.63	0.983	0.151	0.529	0.968	0.913	1	0.839
TR17136|c0_g1_i2	AT1G16710.1 | Symbols: HAC12 | histone acetyltransferase of the CBP family 12 | chr1:5714692-5721782 FORWARD LENGTH=1706	-6.6	-1.06	-2.26	-0.693	-2.6	-2.08	-0.0665	-0.782	-0.599	-0.63	0.000885	0.905	0.2	1	0.0863	0.522	0.996	1	1	0.869
TR17150|c0_g1_i1	AT4G11660.1 | Symbols: AT-HSFB2B, HSFB2B | winged-helix DNA-binding transcription factor family protein | chr4:7043006-7044227 FORWARD LENGTH=377	4.43	0.63	2.33	0.0191	1.45	2.8	1.52	0.817	-0.489	0.955	8.81e-05	1	0.00164	1	0.0144	0.0371	0.0617	0.904	1	0.299
TR17152|c2_g1_i4	AT3G61220.1 | Symbols: | NAD(P)-binding Rossmann-fold superfamily protein | chr3:22663025-22664316 FORWARD LENGTH=296	2.95	0.491	0.402	0.0393	2.01	-1.55	-0.586	-0.181	-0.934	0.149	0.0789	1	0.908	1	0.0358	0.533	0.835	1	0.534	0.98
TR17165|c5_g1_i1	AT1G07890.6 | Symbols: APX1, MEE6, CS1, ATAPX1, ATAPX01 | ascorbate peroxidase 1 | chr1:2438005-2439349 FORWARD LENGTH=249	2.5	1.23	0.826	0.462	-0.0218	2.73	0.636	0.559	0.933	0.603	0.00386	0.0299	0.378	0.953	0.987	0.00063	0.474	0.882	0.288	0.508
TR17165|c5_g1_i2	AT1G07890.6 | Symbols: APX1, MEE6, CS1, ATAPX1, ATAPX01 | ascorbate peroxidase 1 | chr1:2438005-2439349 FORWARD LENGTH=249	2.92	1.37	0.703	0.537	0.304	3.02	1.02	0.502	0.846	0.657	0.00202	0.0255	0.611	0.937	0.693	0.000475	0.113	0.973	0.501	0.511
TR17165|c5_g1_i3	AT1G07890.6 | Symbols: APX1, MEE6, CS1, ATAPX1, ATAPX01 | ascorbate peroxidase 1 | chr1:2438005-2439349 FORWARD LENGTH=249	3.36	1.23	0.99	0.629	0.506	2.77	0.994	0.315	0.678	0.787	0.000168	0.0722	0.305	0.826	0.449	0.00215	0.128	1	0.756	0.349
TR17165|c5_g3_i1	AT1G07890.8 | Symbols: APX1, MEE6, CS1, ATAPX1, ATAPX01 | ascorbate peroxidase 1 | chr1:2438005-2439435 FORWARD LENGTH=250	1.61	1.1	0.519	0.0866	-0.101	0.838	0.507	0.039	0.247	0.0451	0.0152	0.00129	0.508	1	0.865	0.425	0.385	1	1	0.986
TR17165|c5_g3_i5	AT1G07890.8 | Symbols: APX1, MEE6, CS1, ATAPX1, ATAPX01 | ascorbate peroxidase 1 | chr1:2438005-2439435 FORWARD LENGTH=250	0.837	1.07	0.457	-0.0134	-0.682	0.904	0.434	0.274	0.145	0.0523	0.393	0.0162	0.702	1	0.119	0.46	0.631	1	1	0.985
TR17167|c3_g1_i1	AT1G30400.2 | Symbols: ATMRP1, EST1, ABCC1 | multidrug resistance-associated protein 1 | chr1:10728139-10737697 FORWARD LENGTH=1622	-3.78	-0.675	-0.644	-0.757	-1.7	-3.05	-0.85	-0.681	-0.683	-0.834	0.0416	1	0.856	0.976	0.207	0.127	0.674	1	0.998	0.74
TR17167|c3_g2_i1	AT1G30400.2 | Symbols: ATMRP1, EST1, ABCC1 | multidrug resistance-associated protein 1 | chr1:10728139-10737697 FORWARD LENGTH=1622	-3.5	-0.882	-1.19	-0.000999	-1.43	-2.19	-0.56	-0.381	-0.574	-0.673	0.0334	0.925	0.532	1	0.15	0.342	0.842	1	1	0.776
TR17167|c3_g2_i4	AT1G30400.2 | Symbols: ATMRP1, EST1, ABCC1 | multidrug resistance-associated protein 1 | chr1:10728139-10737697 FORWARD LENGTH=1622	-4.98	-1.31	-1.24	-0.775	-1.66	-1.79	-1.09	-0.241	-0.453	-0.00191	0.0151	0.644	0.589	1	0.349	0.534	0.46	1	1	1
TR17176|c2_g1_i2	AT2G37860.3 | Symbols: LCD1 | Protein of unknown function (DUF3411) | chr2:15856952-15858793 FORWARD LENGTH=432	-1.3	0.00771	-0.0627	-0.202	-1.04	-0.844	-0.0955	-0.208	0.0832	-0.624	0.151	1	0.991	1	0.0244	0.531	0.97	1	1	0.412
TR17176|c2_g2_i1	AT2G37860.1 | Symbols: LCD1 | Protein of unknown function (DUF3411) | chr2:15856952-15858351 FORWARD LENGTH=347	-2.4	-0.293	-0.647	-0.411	-1.05	-1.4	-0.483	0.101	-0.327	-0.687	0.00123	1	0.465	0.941	0.0223	0.164	0.579	1	1	0.319
TR17180|c0_g1_i2	No informative hit E<10-6	-2.89	-0.569	-0.676	-0.624	-1.02	-2.07	-0.105	-0.0243	-1.06	-0.877	0.0149	0.983	0.749	0.901	0.152	0.15	0.98	1	0.381	0.389
TR17202|c0_g1_i8	AT4G10100.3 | Symbols: CNX7, SIR5 | co-factor for nitrate, reductase and xanthine dehydrogenase 7 | chr4:6309091-6309381 FORWARD LENGTH=96	1.19	0.876	-0.159	-1.53	2	0.283	-0.0635	-0.00443	0.239	0.112	0.637	0.981	0.989	0.416	0.0262	0.964	0.996	1	1	0.987
TR17216|c0_g1_i1	AT5G26710.1 | Symbols: | Glutamyl/glutaminyl-tRNA synthetase, class Ic | chr5:9305673-9308247 FORWARD LENGTH=719	-1.44	-0.178	-0.33	0.0599	-0.99	-0.293	-0.415	0.273	-0.0496	-0.102	0.175	1	0.885	1	0.0478	0.914	0.776	1	1	0.971
TR17220|c6_g2_i7	AT1G68520.1 | Symbols: | B-box type zinc finger protein with CCT domain | chr1:25709331-25710749 REVERSE LENGTH=406	-2.68	-0.553	-0.897	-0.215	-1.01	-1.66	-0.394	-0.177	-0.674	-0.418	0.0033	0.833	0.351	1	0.0225	0.117	0.757	1	0.742	0.687
TR17227|c0_g1_i1	AT1G25450.1 | Symbols: KCS5, CER60 | 3-ketoacyl-CoA synthase 5 | chr1:8938679-8940282 REVERSE LENGTH=492	1.07	-0.105	0.366	-0.0742	0.887	0.312	0.628	-0.319	-0.225	0.227	0.298	1	0.837	1	0.04	0.894	0.404	1	1	0.885
TR17230|c3_g1_i1	AT2G45540.1 | Symbols: | WD-40 repeat family protein / beige-related | chr2:18757881-18772229 REVERSE LENGTH=2946	-2.04	-0.513	-0.628	-0.346	-0.556	-0.771	-0.638	-0.0579	-0.0653	-0.0103	0.0281	0.899	0.587	1	0.401	0.649	0.407	1	1	1
TR17231|c2_g1_i1	AT3G47890.1 | Symbols: | Ubiquitin carboxyl-terminal hydrolase-related protein | chr3:17667172-17673530 REVERSE LENGTH=1568	-1.05	-0.18	-0.0806	0.0365	-0.826	-0.17	-0.0231	-0.0193	-0.113	-0.0149	0.183	1	0.981	1	0.044	0.936	0.996	1	1	1
TR17231|c4_g1_i4	AT3G47890.1 | Symbols: | Ubiquitin carboxyl-terminal hydrolase-related protein | chr3:17667172-17673530 REVERSE LENGTH=1568	-3.63	-1.11	-1.36	0.316	-1.47	0.719	-0.0357	0.565	0.0694	0.121	0.0409	0.659	0.439	1	0.242	0.84	0.997	1	1	0.982
TR17233|c1_g1_i3	AT5G52990.1 | Symbols: | SNARE-like superfamily protein | chr5:21484188-21485006 FORWARD LENGTH=272	-0.132	-0.00182	-0.0204	-0.109	-0.000365	-2.99	-0.296	-0.707	-0.813	-1.18	0.954	1	1	1	1	6.88e-05	0.861	0.645	0.361	0.0208
TR17254|c1_g2_i4	AT4G23430.3 | Symbols: | NAD(P)-binding Rossmann-fold superfamily protein | chr4:12229171-12231493 FORWARD LENGTH=310	-2.2	-0.731	0.994	-0.272	-2.19	-11	-5.42	1.21	-5.14	-1.61	0.728	1	0.952	1	0.647	0.031	0.181	1	0.316	0.834
TR17257|c1_g2_i2	AT5G36110.1 | Symbols: CYP716A1 | cytochrome P450, family 716, subfamily A, polypeptide 1 | chr5:14195377-14197613 FORWARD LENGTH=477	-1.6	-0.281	-1.21	0.719	-0.832	-4.08	-0.0469	-1.25	-0.602	-2.18	0.463	1	0.522	1	0.379	0.00481	0.997	0.592	1	0.00415
TR17257|c1_g2_i4	AT5G36110.1 | Symbols: CYP716A1 | cytochrome P450, family 716, subfamily A, polypeptide 1 | chr5:14195377-14197613 FORWARD LENGTH=477	-1.55	-0.418	-0.545	0.183	-0.768	-3.31	-0.179	-1.36	0.205	-1.97	0.506	1	0.896	1	0.453	0.0688	0.974	0.557	1	0.027
TR17257|c1_g2_i5	AT5G36110.1 | Symbols: CYP716A1 | cytochrome P450, family 716, subfamily A, polypeptide 1 | chr5:14195377-14197613 FORWARD LENGTH=477	-1.59	-0.283	-1.23	0.571	-0.643	-4.15	-0.101	-1.3	-0.617	-2.13	0.486	1	0.527	1	0.537	0.00588	0.989	0.581	1	0.00815
TR17279|c0_g3_i16	AT5G59350.1 | Symbols: | unknown protein; FUNCTIONS IN: molecular_function unknown; INVOLVED IN: biological_process unknown; LOCATED IN: endomembrane system; EXPRESSED IN: 23 plant structures; EXPRESSED DURING: 13 growth stages; Has 1807 Blast hits to 1807 proteins in 277 species: Archae - 0; Bacteria - 0; Metazoa - 736; Fungi - 347; Plants - 385; Viruses - 0; Other Eukaryotes - 339 (source: NCBI…	-0.164	0.842	-1.41	-0.176	0.575	-3.73	-0.931	-0.934	-0.494	-1.37	0.983	1	0.716	1	0.717	0.0258	0.631	0.94	1	0.316
TR17287|c2_g1_i2	No informative hit E<10-6	-6.35	0.124	-0.0103	-0.144	-6.32	-1.53	-0.725	-0.0158	0.123	-0.914	0.0891	1	1	1	0.015	0.763	0.878	1	1	0.818
TR17293|c3_g1_i7	AT5G12080.3 | Symbols: MSL10, ATMSL10 | mechanosensitive channel of small conductance-like 10 | chr5:3898182-3900923 REVERSE LENGTH=734	-12.1	-5.45	-3.35	0.0996	-3.43	-0.463	-1.51	-2.8	1.35	2.5	0.0458	0.575	0.725	1	0.357	0.967	0.914	1	1	0.774
TR17298|c1_g1_i1	AT4G12280.1 | Symbols: | copper amine oxidase family protein | chr4:7301769-7302994 FORWARD LENGTH=300	2.27	-0.237	0.0604	0.475	1.97	-1.64	-1.06	-0.602	0.234	-0.209	0.159	1	0.999	1	0.00767	0.49	0.427	1	1	0.957
TR17298|c1_g1_i4	AT4G12280.1 | Symbols: | copper amine oxidase family protein | chr4:7301769-7302994 FORWARD LENGTH=300	3.1	0.00439	0.351	0.476	2.27	-1.21	-1.01	-0.429	0.273	-0.0445	0.0441	1	0.943	1	0.00305	0.679	0.521	1	1	0.998
TR17298|c1_g1_i5	AT4G12290.1 | Symbols: | Copper amine oxidase family protein | chr4:7304434-7306973 FORWARD LENGTH=741	1.5	-0.553	-0.144	0.46	1.73	-1.69	-0.857	-0.525	0.0129	-0.324	0.402	1	0.986	1	0.0182	0.453	0.593	1	1	0.914
TR17303|c3_g2_i1	AT2G02955.1 | Symbols: MEE12 | maternal effect embryo arrest 12 | chr2:859592-861772 FORWARD LENGTH=666	-4.21	-0.184	-1.38	-1.03	-1.6	-0.51	-0.439	0.0399	-0.0402	-0.0714	0.00562	1	0.413	0.759	0.113	0.895	0.86	1	1	0.992
TR17309|c3_g5_i2	AT5G56190.2 | Symbols: | Transducin/WD40 repeat-like superfamily protein | chr5:22742654-22744909 FORWARD LENGTH=447	-2.83	-0.429	-0.302	-0.296	-1.81	-0.368	-0.304	-0.0655	0.137	-0.135	0.0401	1	0.942	1	0.0282	0.922	0.916	1	1	0.976
TR17309|c3_g5_i6	AT5G56190.1 | Symbols: | Transducin/WD40 repeat-like superfamily protein | chr5:22742563-22744909 FORWARD LENGTH=441	-2.74	-0.443	0.0421	-0.217	-2.12	-0.0786	-0.0496	-0.139	-0.14	0.25	0.0417	1	1	1	0.00409	0.995	0.995	1	1	0.927
TR17312|c1_g2_i5	AT1G72330.3 | Symbols: ALAAT2 | alanine aminotransferase 2 | chr1:27233637-27236571 FORWARD LENGTH=553	1.58	0.367	0.0966	0.0114	1.1	-0.0195	0.221	-0.218	0.0166	-0.0384	0.0518	0.991	0.98	1	0.00364	1	0.897	1	1	0.992
TR17324|c1_g1_i11	AT3G47420.1 | Symbols: ATPS3, PS3 | phosphate starvation-induced gene 3 | chr3:17472541-17474209 REVERSE LENGTH=523	0.875	0.355	0.0925	-0.531	0.959	2.71	0.74	0.252	1.22	0.496	0.635	1	0.992	1	0.148	0.0352	0.621	1	0.316	0.772
TR17324|c1_g1_i6	AT3G47420.1 | Symbols: ATPS3, PS3 | phosphate starvation-induced gene 3 | chr3:17472541-17474209 REVERSE LENGTH=523	0.454	0.0849	0.082	-0.111	0.398	2.46	0.435	0.362	1.18	0.486	0.779	1	0.99	1	0.493	0.00393	0.757	1	0.0756	0.623
TR17329|c1_g1_i3	AT2G31140.1 | Symbols: | Peptidase S24/S26A/S26B/S26C family protein | chr2:13270088-13271619 FORWARD LENGTH=205	0.0349	-0.0415	0.247	0.0246	-0.195	1.43	0.175	0.394	0.637	0.22	0.996	1	0.868	1	0.726	0.0441	0.907	0.89	0.329	0.857
TR17338|c1_g2_i4	AT1G53280.1 | Symbols: | Class I glutamine amidotransferase-like superfamily protein | chr1:19864942-19867341 REVERSE LENGTH=438	0.256	0.165	0.397	0.764	-1.07	-0.0965	0.0921	0.00465	-0.0435	-0.15	0.859	1	0.769	0.316	0.00661	0.977	0.972	1	1	0.935
TR17341|c1_g2_i1	AT5G26340.1 | Symbols: MSS1, STP13, ATSTP13 | Major facilitator superfamily protein | chr5:9243851-9246994 REVERSE LENGTH=526	2.51	0.526	1.34	0.387	0.25	0.726	0.411	0.275	0.146	-0.106	0.0438	0.999	0.123	1	0.83	0.771	0.845	1	1	0.979
TR17350|c0_g1_i1	AT5G49660.1 | Symbols: | Leucine-rich repeat transmembrane protein kinase family protein | chr5:20161401-20164534 REVERSE LENGTH=966	-4.47	-0.811	-0.908	-0.656	-2.09	-1.47	-0.0841	0.419	-1.27	-0.536	6.15e-05	0.86	0.6	0.92	0.00164	0.489	0.989	1	0.289	0.782
TR17350|c0_g1_i4	AT5G49660.1 | Symbols: | Leucine-rich repeat transmembrane protein kinase family protein | chr5:20161401-20164534 REVERSE LENGTH=966	-3.98	-0.651	-0.789	-0.643	-1.9	-1.57	-0.279	0.535	-1.31	-0.522	0.000404	0.962	0.677	0.937	0.00363	0.432	0.936	1	0.246	0.782
TR17351|c1_g1_i10	AT4G37310.1 | Symbols: CYP81H1 | cytochrome P450, family 81, subfamily H, polypeptide 1 | chr4:17556152-17558833 REVERSE LENGTH=518	5.19	1.12	0.685	0.632	2.75	14.3	1.33	4.97	3.63	4.37	0.115	1	0.954	1	0.134	6.61e-08	0.77	0.0275	0.316	0.0124
TR17351|c1_g1_i11	AT4G37310.1 | Symbols: CYP81H1 | cytochrome P450, family 81, subfamily H, polypeptide 1 | chr4:17556152-17558833 REVERSE LENGTH=518	9.38	2.24	1.52	1.87	3.75	14.3	1.72	3.4	5.94	3.21	0.00306	0.648	0.792	0.959	0.0498	1.54e-07	0.648	0.229	0.0321	0.116
TR17360|c2_g1_i1	No informative hit E<10-6	-2.92	-0.583	-0.582	-0.712	-1.04	-0.277	-0.151	0.116	-0.234	-0.00803	0.019	0.982	0.803	0.894	0.164	0.946	0.969	1	1	1
TR17360|c3_g1_i4	AT5G06860.1 | Symbols: PGIP1, ATPGIP1 | polygalacturonase inhibiting protein 1 | chr5:2132373-2133434 FORWARD LENGTH=330	7.51	2.09	1.37	1.55	2.5	1.43	-0.894	1.7	-0.66	1.28	0.0201	0.901	0.824	0.953	0.177	0.852	0.892	0.935	1	0.788
TR17367|c1_g6_i3	No informative hit E<10-6	-4.21	-1.06	-0.6	-0.588	-1.97	-0.0396	0.273	0.414	-0.267	-0.459	0.0151	0.747	0.874	1	0.114	1	0.946	1	1	0.903
TR17372|c0_g1_i4	AT5G15400.1 | Symbols: | U-box domain-containing protein | chr5:4997764-5002907 REVERSE LENGTH=1038	-4.04	-0.685	-1.33	-0.445	-1.57	-1.15	-0.517	0.329	-0.173	-0.789	0.00864	0.961	0.41	1	0.157	0.666	0.815	1	1	0.682
TR17958|c0_g1_i7	AT2G16770.1 | Symbols: bZIP23 | Basic-leucine zipper (bZIP) transcription factor family protein | chr2:7279859-7280817 FORWARD LENGTH=249	-1.01	0.279	0.177	-0.152	-1.32	0.126	0.238	0.337	-0.301	-0.147	0.499	1	0.972	1	0.0307	0.979	0.928	1	1	0.96
TR17964|c0_g2_i1	AT1G06620.1 | Symbols: | 2-oxoglutarate (2OG) and Fe(II)-dependent oxygenase superfamily protein | chr1:2025618-2027094 FORWARD LENGTH=365	7.02	2.2	1.74	0.653	2.42	11.8	2.93	3.05	2.54	3.32	0.000153	0.237	0.487	1	0.0248	1.7e-13	0.0105	0.02	0.122	0.00155
TR17964|c0_g2_i4	AT1G06620.1 | Symbols: | 2-oxoglutarate (2OG) and Fe(II)-dependent oxygenase superfamily protein | chr1:2025618-2027094 FORWARD LENGTH=365	6.02	0.652	2.23	-0.117	3.25	11.9	3.4	3.32	2.6	2.56	0.0189	1	0.441	1	0.0154	9.95e-09	0.03	0.0852	0.332	0.16
TR17964|c0_g5_i1	AT1G06650.1 | Symbols: | 2-oxoglutarate (2OG) and Fe(II)-dependent oxygenase superfamily protein | chr1:2035909-2037047 FORWARD LENGTH=314	6.25	1.45	2.34	0.447	2.02	12.4	3.08	2.85	3.11	3.33	0.000826	0.678	0.19	1	0.0742	2.7e-15	0.00327	0.0213	0.0142	0.00232
TR17964|c0_g5_i2	AT1G06620.1 | Symbols: | 2-oxoglutarate (2OG) and Fe(II)-dependent oxygenase superfamily protein | chr1:2025618-2027094 FORWARD LENGTH=365	6.33	1.63	1.91	0.0547	2.74	12.1	2.82	3.58	2.11	3.62	0.00291	0.577	0.462	1	0.0271	6.48e-14	0.0181	0.00153	0.349	0.000562
TR17964|c0_g5_i4	AT1G06620.1 | Symbols: | 2-oxoglutarate (2OG) and Fe(II)-dependent oxygenase superfamily protein | chr1:2025618-2027094 FORWARD LENGTH=365	5.44	1.54	1.88	0.841	1.18	9.61	2.8	3.01	2.15	1.65	0.01	0.564	0.436	1	0.441	1.12e-09	0.0181	0.00932	0.218	0.36
TR17964|c0_g5_i5	AT1G06650.2 | Symbols: | 2-oxoglutarate (2OG) and Fe(II)-dependent oxygenase superfamily protein | chr1:2035909-2037186 FORWARD LENGTH=369	4.58	1.64	1.47	0.481	0.987	8.16	2.04	2.21	1.98	1.92	0.0858	0.709	0.711	1	0.613	2.04e-05	0.245	0.38	0.53	0.293
TR17972|c0_g1_i3	AT3G50910.1 | Symbols: | unknown protein; BEST Arabidopsis thaliana protein match is: unknown protein (TAIR:AT5G66480.1); Has 76 Blast hits to 75 proteins in 28 species: Archae - 0; Bacteria - 10; Metazoa - 7; Fungi - 2; Plants - 49; Viruses - 0; Other Eukaryotes - 8 (source: NCBI BLink). | chr3:18920189-18921999 FORWARD LENGTH=447	-0.0116	0.0777	-0.161	-0.151	0.223	-1.02	0.235	0.0686	-0.363	-0.965	1	1	0.946	1	0.666	0.285	0.854	1	0.92	0.00593
TR17974|c0_g2_i10	AT4G13590.1 | Symbols: | Uncharacterized protein family (UPF0016) | chr4:7901369-7903792 REVERSE LENGTH=359	1.95	0.708	0.688	1.74	-1.19	0.481	-0.255	0.27	0.203	0.263	0.179	0.932	0.739	0.0371	0.105	0.893	0.941	1	1	0.933
TR17994|c1_g1_i2	AT3G26400.1 | Symbols: EIF4B1 | eukaryotic translation initiation factor 4B1 | chr3:9666616-9669081 FORWARD LENGTH=532	-2.59	-0.416	-0.73	-0.793	-0.649	-0.21	-0.154	0.359	-0.119	-0.296	0.0214	1	0.642	0.695	0.396	0.958	0.964	1	1	0.906
TR17994|c1_g1_i4	AT3G26400.1 | Symbols: EIF4B1 | eukaryotic translation initiation factor 4B1 | chr3:9666616-9669081 FORWARD LENGTH=532	-2.81	-0.173	-1.25	-0.332	-1.05	-0.719	-0.547	0.812	-0.393	-0.591	0.00252	1	0.0978	1	0.058	0.717	0.616	0.544	1	0.607
TR17995|c0_g4_i1	AT1G12110.1 | Symbols: NRT1.1, CHL1-1, NRT1, B-1, ATNRT1, CHL1 | nitrate transporter 1.1 | chr1:4105341-4109290 FORWARD LENGTH=590	-2.06	0.0115	-0.482	-0.223	-1.36	-2.6	-0.229	-0.428	-0.7	-1.24	0.131	1	0.857	1	0.0478	0.042	0.944	1	0.879	0.107
TR17999|c1_g1_i4	AT2G32120.2 | Symbols: HSP70T-2 | heat-shock protein 70T-2 | chr2:13651720-13653411 REVERSE LENGTH=563	1.44	0.0331	-0.234	0.205	1.44	2	0.632	-0.409	0.941	0.834	0.218	1	0.947	1	0.00388	0.0993	0.583	1	0.41	0.326
TR18018|c2_g2_i5	AT3G27890.1 | Symbols: NQR | NADPH:quinone oxidoreductase | chr3:10350807-10351938 REVERSE LENGTH=196	-5.22	-1.66	-0.242	-3.05	-0.26	0.854	0.88	-0.131	-0.434	0.539	0.00571	0.555	0.98	0.0183	0.884	0.868	0.776	1	1	0.887
TR18030|c1_g2_i1	AT1G15460.1 | Symbols: ATBOR4, BOR4 | HCO3- transporter family | chr1:5310196-5313376 REVERSE LENGTH=683	-5.31	-0.388	0.799	0.375	-6.09	1.76	0.801	-2.11	2.71	0.357	0.272	1	0.944	1	0.0449	0.809	0.915	0.853	0.642	0.969
TR18031|c1_g1_i7	AT3G08590.2 | Symbols: | Phosphoglycerate mutase, 2,3-bisphosphoglycerate-independent | chr3:2608683-2611237 REVERSE LENGTH=560	-1.04	-0.159	-0.0736	0.012	-0.819	-1.05	-0.37	-0.0669	-0.291	-0.323	0.181	1	0.984	1	0.0208	0.264	0.671	1	0.999	0.729
TR18033|c3_g4_i3	AT5G16930.1 | Symbols: | AAA-type ATPase family protein | chr5:5568578-5571565 FORWARD LENGTH=644	-2.94	-0.333	-0.688	-0.358	-1.56	1.27	-0.534	0.687	0.757	0.364	0.0334	1	0.603	1	0.163	0.533	0.704	0.769	0.866	0.9
TR18034|c0_g1_i1	AT3G48460.1 | Symbols: | GDSL-like Lipase/Acylhydrolase superfamily protein | chr3:17949496-17951082 FORWARD LENGTH=381	1.67	0.721	0.0407	0.0288	0.881	0.256	0.343	-0.302	0.0751	0.141	0.0633	0.524	0.998	1	0.0492	0.917	0.802	1	1	0.947
TR18034|c0_g1_i6	AT3G48460.1 | Symbols: | GDSL-like Lipase/Acylhydrolase superfamily protein | chr3:17949496-17951082 FORWARD LENGTH=381	0.751	0.305	-0.407	-0.0439	0.896	-0.851	-0.307	-0.453	-0.032	-0.0597	0.521	1	0.794	1	0.0485	0.554	0.835	0.944	1	0.983
TR18036|c0_g1_i1	AT3G16350.1 | Symbols: | Homeodomain-like superfamily protein | chr3:5547828-5549397 FORWARD LENGTH=387	1.31	0.259	0.563	0.0564	0.429	2.42	0.449	0.748	0.155	1.06	0.133	1	0.616	1	0.351	0.000403	0.654	0.449	1	0.00451
TR18036|c0_g1_i3	AT3G16350.1 | Symbols: | Homeodomain-like superfamily protein | chr3:5547828-5549397 FORWARD LENGTH=387	1.12	0.38	0.421	0.0882	0.23	2.64	0.758	0.891	-0.0282	1.02	0.237	0.996	0.779	1	0.685	0.000128	0.219	0.251	1	0.0135
TR18036|c0_g1_i4	AT3G16350.1 | Symbols: | Homeodomain-like superfamily protein | chr3:5547828-5549397 FORWARD LENGTH=387	1.17	0.231	0.499	0.0174	0.422	1.97	0.788	0.122	0.236	0.821	0.29	1	0.764	1	0.441	0.0418	0.289	1	1	0.177
TR18040|c2_g3_i1	AT5G67460.1 | Symbols: | O-Glycosyl hydrolases family 17 protein | chr5:26921984-26923274 REVERSE LENGTH=380	-1.17	0.0274	-0.251	-0.301	-0.647	-2.12	-0.389	-0.311	-0.289	-1.13	0.327	1	0.937	1	0.27	0.0337	0.805	1	1	0.0367
TR18040|c2_g3_i3	AT5G67460.1 | Symbols: | O-Glycosyl hydrolases family 17 protein | chr5:26921984-26923274 REVERSE LENGTH=380	-1.69	-0.234	-0.384	-0.236	-0.831	-2.12	-0.462	-0.253	-0.288	-1.11	0.0867	1	0.845	1	0.104	0.0193	0.7	1	1	0.0238
TR18047|c1_g2_i5	AT2G39130.1 | Symbols: | Transmembrane amino acid transporter family protein | chr2:16323171-16326744 REVERSE LENGTH=550	-1.06	0.349	-0.0058	0.0922	-1.5	-3.67	-0.938	-1.18	-0.234	-1.32	0.666	1	1	1	0.23	0.0289	0.555	0.799	1	0.451
TR18057|c0_g1_i1	AT2G15760.1 | Symbols: | Protein of unknown function (DUF1645) | chr2:6865807-6866754 REVERSE LENGTH=315	6.09	1.75	1.6	0.513	2.23	2.74	0.462	0.0676	0.702	1.51	0.00508	0.63	0.563	1	0.104	0.382	0.935	1	1	0.414
TR18065|c0_g3_i3	AT5G43260.1 | Symbols: | chaperone protein dnaJ-related | chr5:17357693-17357986 REVERSE LENGTH=97	1.79	0.642	0.002	0.0937	1.05	0.707	0.55	0.074	-0.235	0.318	0.0995	0.838	1	1	0.0441	0.735	0.661	1	1	0.858
TR18073|c2_g1_i3	AT5G57280.1 | Symbols: | S-adenosyl-L-methionine-dependent methyltransferases superfamily protein | chr5:23204533-23206485 FORWARD LENGTH=289	1.14	0.498	-0.164	0.316	0.485	1.85	0.285	0.549	0.428	0.583	0.248	0.901	0.958	1	0.351	0.0385	0.861	0.829	0.949	0.471
TR18073|c2_g1_i4	AT5G57280.1 | Symbols: | S-adenosyl-L-methionine-dependent methyltransferases superfamily protein | chr5:23204533-23206485 FORWARD LENGTH=289	-0.0392	0.2	-0.69	0.077	0.374	2.53	0.285	0.583	0.748	0.919	1	1	0.644	1	0.664	0.0296	0.907	0.947	0.762	0.393
TR18079|c0_g3_i5	AT1G56440.1 | Symbols: TPR5 | Tetratricopeptide repeat (TPR)-like superfamily protein | chr1:21138765-21141482 REVERSE LENGTH=476	-6.74	-2.03	-1.36	-1.12	-2.22	1.24	0.959	0.629	0.55	-0.893	0.0114	0.649	0.755	1	0.217	0.892	0.874	1	1	0.903
TR18101|c0_g1_i1	AT3G18670.1 | Symbols: | Ankyrin repeat family protein | chr3:6424135-6426471 REVERSE LENGTH=598	-3.02	0.212	0.93	1.19	-5.36	7.47	2.06	1.7	1.39	2.32	0.588	1	0.942	1	0.0402	0.119	0.703	1	1	0.656
TR18101|c0_g1_i2	AT3G18670.1 | Symbols: | Ankyrin repeat family protein | chr3:6424135-6426471 REVERSE LENGTH=598	-7.41	-0.847	0.547	-1.1	-6.01	11	3.12	1.01	2.44	4.38	0.152	1	0.979	1	0.0452	0.0206	0.519	1	0.927	0.278
TR18103|c1_g2_i1	AT1G05680.1 | Symbols: UGT74E2 | Uridine diphosphate glycosyltransferase 74E2 | chr1:1703196-1704639 REVERSE LENGTH=453	-0.835	0.129	-0.306	0.0825	-0.741	-2.34	-0.0132	-0.738	-0.00866	-1.58	0.666	1	0.944	1	0.334	0.129	1	0.923	1	0.0171
TR18120|c8_g1_i1	AT5G45960.1 | Symbols: | GDSL-like Lipase/Acylhydrolase superfamily protein | chr5:18637174-18640319 REVERSE LENGTH=375	2.49	0.817	0.677	-0.488	1.49	0.643	-0.111	-0.502	0.832	0.425	0.093	0.941	0.8	1	0.0219	0.835	0.984	1	0.678	0.843
TR18120|c8_g1_i9	AT5G45960.1 | Symbols: | GDSL-like Lipase/Acylhydrolase superfamily protein | chr5:18637174-18640319 REVERSE LENGTH=375	1.89	0.281	0.356	-0.178	1.43	0.909	0.216	-0.154	0.764	0.0827	0.195	1	0.925	1	0.0297	0.693	0.948	1	0.738	0.983
TR18140|c0_g2_i1	AT1G04260.1 | Symbols: MPI7, MPIP7, PRA1.D | CAMV movement protein interacting protein 7 | chr1:1140749-1141297 REVERSE LENGTH=182	8.1	2.16	2.91	1.1	1.93	0.0253	0.0671	0.517	-2.45	1.9	0.000853	0.555	0.208	1	0.193	1	0.997	1	0.324	0.395
TR18158|c1_g1_i2	AT1G21090.1 | Symbols: | Cupredoxin superfamily protein | chr1:7384854-7386199 FORWARD LENGTH=242	0.429	0.594	-0.512	0.169	0.179	-2.14	-0.775	-0.236	-0.278	-0.852	0.81	0.921	0.776	1	0.845	0.0461	0.33	1	1	0.324
TR18159|c4_g2_i8	AT3G23100.2 | Symbols: XRCC4 | homolog of human DNA ligase iv-binding protein XRCC4 | chr3:8220721-8221991 FORWARD LENGTH=264	2.1	-0.917	-3.14	0.345	5.82	-6.58	-0.401	-0.0128	-0.856	-5.31	0.758	1	0.57	1	0.0239	0.238	0.979	1	1	0.0699
TR18171|c0_g2_i1	AT5G26770.1 | Symbols: | unknown protein; BEST Arabidopsis thaliana protein match is: unknown protein (TAIR:AT3G05830.1); Has 30201 Blast hits to 17322 proteins in 780 species: Archae - 12; Bacteria - 1396; Metazoa - 17338; Fungi - 3422; Plants - 5037; Viruses - 0; Other Eukaryotes - 2996 (source: NCBI BLink). | chr5:9407981-9409735 REVERSE LENGTH=335	0.023	0.206	0.563	-0.504	-0.242	-1.81	-0.486	-0.336	-0.438	-0.548	1	1	0.612	0.735	0.681	0.0286	0.591	1	0.882	0.485
TR18176|c1_g2_i1	AT4G25810.1 | Symbols: XTR6, XTH23 | xyloglucan endotransglycosylase 6 | chr4:13128694-13129715 FORWARD LENGTH=286	5.01	1.06	3.49	0.353	0.106	1.81	-0.292	1.33	-0.314	1.09	0.007	0.863	0.00365	1	0.957	0.654	0.962	0.89	1	0.603
TR18176|c1_g4_i1	AT5G57560.1 | Symbols: TCH4, XTH22 | Xyloglucan endotransglucosylase/hydrolase family protein | chr5:23307296-23308235 REVERSE LENGTH=284	6.54	1.54	4.44	-0.27	0.831	2.21	-0.723	1.23	-0.646	2.35	0.00105	0.555	0.00161	1	0.468	0.705	0.854	1	1	0.0652
TR18193|c2_g2_i1	AT3G05420.2 | Symbols: ACBP4 | acyl-CoA binding protein 4 | chr3:1561880-1567047 FORWARD LENGTH=669	-2.09	-0.35	-0.294	0.0604	-1.51	-1.1	-0.27	-0.19	-0.353	-0.285	0.0257	1	0.9	1	0.00262	0.439	0.879	1	1	0.867
TR18195|c2_g1_i2	AT2G36390.1 | Symbols: SBE2.1, BE3 | starch branching enzyme 2.1 | chr2:15264283-15269940 FORWARD LENGTH=858	-2.02	-0.366	-0.497	-0.002	-1.16	-2.52	-0.802	-0.295	-0.349	-1.07	0.122	1	0.834	1	0.101	0.0416	0.477	1	1	0.211
TR18195|c2_g1_i3	AT2G36390.1 | Symbols: SBE2.1, BE3 | starch branching enzyme 2.1 | chr2:15264283-15269940 FORWARD LENGTH=858	-2.57	-0.489	-0.923	-0.166	-0.993	-3.15	-0.834	-0.641	-0.238	-1.44	0.0407	1	0.487	1	0.223	0.00303	0.419	0.926	1	0.0359
TR18195|c2_g1_i4	AT2G36390.1 | Symbols: SBE2.1, BE3 | starch branching enzyme 2.1 | chr2:15264283-15269940 FORWARD LENGTH=858	-2.2	-0.335	-0.598	0.0707	-1.34	-2.3	-0.841	-0.392	-0.194	-0.875	0.0805	1	0.755	1	0.0472	0.0756	0.412	1	1	0.394
TR18195|c2_g1_i5	AT2G36390.1 | Symbols: SBE2.1, BE3 | starch branching enzyme 2.1 | chr2:15264283-15269940 FORWARD LENGTH=858	-1.79	-0.215	-0.46	0.17	-1.29	-2.13	-0.735	-0.395	-0.13	-0.873	0.124	1	0.817	1	0.0378	0.0546	0.426	1	1	0.292
TR18201|c1_g1_i1	AT5G64260.1 | Symbols: EXL2 | EXORDIUM like 2 | chr5:25703980-25704897 FORWARD LENGTH=305	-2.45	0.255	0.356	-0.78	-2.28	0.523	-0.62	0.859	-0.316	0.6	0.216	1	0.961	0.976	0.00538	0.913	0.826	0.997	1	0.799
TR18245|c2_g1_i3	No informative hit E<10-6	-0.351	0.235	0.551	-1.63	0.489	-8.13	-1.06	-5.35	0.518	-2.25	0.977	1	0.974	0.992	0.893	0.0305	0.891	0.0298	1	0.564
TR18245|c2_g1_i5	No informative hit E<10-6	0.357	1.05	-0.714	-1.47	1.49	-9.65	-1.57	-6.8	0.355	-1.63	0.984	1	0.965	1	0.649	0.0337	0.834	0.0329	1	0.804
TR18246|c0_g1_i4	AT3G08720.2 | Symbols: ATPK19, ATPK2 | serine/threonine protein kinase 2 | chr3:2648625-2650407 REVERSE LENGTH=471	1.37	0.156	0.157	0.175	0.887	0.0827	0.109	-0.113	-0.138	0.225	0.0609	1	0.948	1	0.017	0.979	0.962	1	1	0.861
TR18253|c0_g1_i1	No informative hit E<10-6	-1.85	0.0397	-0.78	-0.00584	-1.11	0.553	-0.593	0.851	0.0419	0.253	0.0946	1	0.53	1	0.0448	0.818	0.642	0.575	1	0.906
TR18810|c1_g1_i11	AT3G01680.1 | Symbols: | CONTAINS InterPro DOMAIN/s: Mediator complex subunit Med28 (InterPro:IPR021640); BEST Arabidopsis thaliana protein match is: unknown protein (TAIR:AT3G01670.1); Has 122 Blast hits to 112 proteins in 13 species: Archae - 0; Bacteria - 0; Metazoa - 0; Fungi - 0; Plants - 122; Viruses - 0; Other Eukaryotes - 0 (source: NCBI BLink). | chr3:252033-255246 FORWARD LENGTH=740	-2.38	-0.00975	-0.811	-0.47	-1.09	-0.455	-0.031	0.501	-0.0481	-0.877	0.0459	1	0.607	1	0.0861	0.882	0.997	1	1	0.363
TR18814|c1_g2_i3	AT4G32600.1 | Symbols: | RING/U-box superfamily protein | chr4:15724010-15725737 FORWARD LENGTH=453	0.805	0.0294	0.0504	0.0144	0.711	2.33	0.933	0.451	0.152	0.795	0.585	1	0.998	1	0.228	0.0317	0.26	1	1	0.367
TR18823|c0_g1_i9	AT3G24190.1 | Symbols: | Protein kinase superfamily protein | chr3:8743319-8747703 FORWARD LENGTH=793	1.42	0.132	-0.0374	1.24	0.0849	-0.779	0.204	-0.321	-0.578	-0.0845	0.119	1	0.999	0.0398	0.906	0.608	0.914	1	0.81	0.97
TR18826|c2_g2_i12	AT2G01220.1 | Symbols: | Nucleotidylyl transferase superfamily protein | chr2:123301-126213 FORWARD LENGTH=387	1.42	0.219	0.369	-0.13	0.963	0.316	0.0632	-0.0387	0.116	0.175	0.131	1	0.82	1	0.0403	0.893	0.987	1	1	0.935
TR18826|c2_g2_i3	AT2G01220.1 | Symbols: | Nucleotidylyl transferase superfamily protein | chr2:123301-126213 FORWARD LENGTH=387	1.26	-0.084	-0.394	0.375	1.36	0.422	-0.182	0.246	-0.0621	0.421	0.211	1	0.797	1	0.00132	0.849	0.938	1	1	0.748
TR18826|c2_g2_i9	AT2G01220.1 | Symbols: | Nucleotidylyl transferase superfamily protein | chr2:123301-126213 FORWARD LENGTH=387	1.42	0.154	0.289	-0.0761	1.05	0.26	0.024	-0.0561	-0.072	0.364	0.154	1	0.896	1	0.0257	0.922	0.997	1	1	0.801
TR18832|c0_g2_i2	AT4G27430.2 | Symbols: CIP7 | COP1-interacting protein 7 | chr4:13718817-13722736 FORWARD LENGTH=1058	-1.39	-0.347	-0.268	-0.299	-0.472	-1.42	-0.643	-0.279	-0.223	-0.279	0.0489	0.946	0.833	0.971	0.344	0.0376	0.123	1	1	0.804
TR18832|c0_g2_i3	AT4G27430.2 | Symbols: CIP7 | COP1-interacting protein 7 | chr4:13718817-13722736 FORWARD LENGTH=1058	-8.7	-1.06	-1.61	-0.261	-5.77	-2.35	-1.08	-0.362	-0.326	-0.582	0.000128	0.752	0.19	1	0.015	0.294	0.387	1	1	0.88
TR18832|c0_g2_i4	AT4G27430.2 | Symbols: CIP7 | COP1-interacting protein 7 | chr4:13718817-13722736 FORWARD LENGTH=1058	-1.65	-0.394	-0.415	-0.353	-0.493	-2.14	-0.912	-0.192	-0.276	-0.756	0.11	1	0.802	1	0.504	0.0227	0.119	1	1	0.409
TR18832|c0_g2_i5	AT4G27430.2 | Symbols: CIP7 | COP1-interacting protein 7 | chr4:13718817-13722736 FORWARD LENGTH=1058	-1.41	-0.239	-0.221	-0.264	-0.681	-1.73	-0.943	-0.0915	-0.277	-0.419	0.074	1	0.901	1	0.167	0.0137	0.00816	1	1	0.651
TR18834|c0_g1_i3	AT3G11670.2 | Symbols: DGD1 | UDP-Glycosyltransferase superfamily protein | chr3:3681679-3684495 REVERSE LENGTH=639	-1.66	-0.291	0.187	0.0542	-1.61	-0.417	0.0122	-0.247	-0.17	-0.0112	0.266	1	0.975	1	0.00918	0.906	1	1	1	1
TR18836|c1_g4_i2	AT5G49900.1 | Symbols: | Beta-glucosidase, GBA2 type family protein | chr5:20297235-20302019 REVERSE LENGTH=957	-1.91	-0.39	-0.572	-0.138	-0.807	-1.01	-0.417	0.00255	-0.369	-0.225	0.0396	0.999	0.65	1	0.139	0.485	0.737	1	0.995	0.903
TR18839|c4_g2_i4	AT2G36830.1 | Symbols: GAMMA-TIP, TIP1;1, GAMMA-TIP1 | gamma tonoplast intrinsic protein | chr2:15445490-15446336 FORWARD LENGTH=251	0.96	0.503	0.373	-0.289	0.374	1.73	1.09	-0.23	-0.307	1.18	0.429	0.949	0.857	1	0.553	0.127	0.0462	1	1	0.0193
TR18847|c1_g1_i2	AT1G58410.1 | Symbols: | Disease resistance protein (CC-NBS-LRR class) family | chr1:21701286-21704255 REVERSE LENGTH=899	1.36	0.0255	-0.507	0.0834	1.76	-0.795	-0.729	0.151	-0.0187	-0.198	0.541	1	0.905	1	0.0467	0.837	0.754	1	1	0.967
TR18852|c2_g1_i2	No informative hit E<10-6	4.96	0.673	1.36	1.07	1.85	14.2	2.67	4.24	4.64	2.61	0.238	1	0.878	1	0.41	0.000787	0.603	0.61	0.351	0.622
TR18855|c1_g1_i1	AT4G09020.1 | Symbols: ATISA3, ISA3 | isoamylase 3 | chr4:5784099-5788839 FORWARD LENGTH=764	0.285	0.171	0.0645	0.0076	0.0418	-1.77	-0.879	-0.136	-0.197	-0.562	0.845	1	0.991	1	0.966	0.0372	0.0733	1	1	0.494
TR18857|c1_g2_i1	AT5G62890.3 | Symbols: | Xanthine/uracil permease family protein | chr5:25243723-25247075 FORWARD LENGTH=532	-1.02	-0.0268	-0.141	0.0024	-0.859	-0.781	-0.625	-0.0347	0.223	-0.344	0.286	1	0.964	1	0.0422	0.582	0.356	1	1	0.764
TR18858|c5_g1_i2	AT4G24160.1 | Symbols: | alpha/beta-Hydrolases superfamily protein | chr4:12539871-12542210 FORWARD LENGTH=418	1.96	0.786	0.597	-0.0303	0.607	1.22	0.466	0.137	0.178	0.441	0.000422	0.0646	0.327	1	0.0699	0.103	0.442	1	1	0.471
TR18865|c0_g1_i1	AT4G14300.1 | Symbols: | RNA-binding (RRM/RBD/RNP motifs) family protein | chr4:8231179-8232785 FORWARD LENGTH=411	-1.68	-0.304	-0.385	-0.0594	-0.931	-0.0233	-0.286	0.343	0.00967	-0.0903	0.0585	1	0.818	1	0.0372	1	0.86	1	1	0.972
TR18865|c0_g1_i3	AT4G14300.1 | Symbols: | RNA-binding (RRM/RBD/RNP motifs) family protein | chr4:8231179-8232785 FORWARD LENGTH=411	-1.47	-0.198	-0.219	-0.237	-0.819	0.00111	-0.164	0.0396	0.0459	0.0792	0.0404	1	0.905	1	0.0288	1	0.922	1	1	0.969
TR18868|c1_g2_i11	AT1G74710.1 | Symbols: EDS16, ICS1, SID2, ATICS1 | ADC synthase superfamily protein | chr1:28070391-28073898 FORWARD LENGTH=569	0.42	-0.197	0.152	0.383	0.0824	1.7	0.319	0.0628	0.459	0.859	0.738	1	0.96	0.959	0.911	0.0392	0.801	1	0.856	0.0628
TR18870|c1_g2_i1	AT1G11300.1 | Symbols: | protein serine/threonine kinases;protein kinases;ATP binding;sugar binding;kinases;carbohydrate binding | chr1:3794389-3800719 FORWARD LENGTH=1650	3.51	0.0448	0.398	0.854	2.22	-0.265	0.369	-1.58	0.234	0.708	0.0823	1	0.954	0.987	0.0247	0.972	0.94	0.619	1	0.823
TR18872|c3_g2_i2	AT3G24030.1 | Symbols: | hydroxyethylthiazole kinase family protein | chr3:8679862-8680812 REVERSE LENGTH=276	-0.583	-0.0748	0.0721	0.833	-1.41	0.213	0.486	0.633	-0.364	-0.542	0.772	1	0.995	0.723	0.0288	0.956	0.774	0.913	1	0.731
TR18874|c0_g1_i1	AT2G28550.2 | Symbols: RAP2.7, TOE1 | related to AP2.7 | chr2:12226444-12228251 REVERSE LENGTH=381	-1.82	-0.333	-0.251	-0.0253	-1.21	-0.92	-0.825	0.134	-0.139	-0.09	0.0789	1	0.929	1	0.0308	0.596	0.243	1	1	0.979
TR18875|c1_g1_i4	AT1G08620.2 | Symbols: PKDM7D | Transcription factor jumonji (jmj) family protein / zinc finger (C5HC2 type) family protein | chr1:2737554-2743370 FORWARD LENGTH=1209	-2.01	-0.322	-0.74	-0.00679	-0.936	-0.906	-0.0709	-0.0735	-0.274	-0.488	0.0369	1	0.495	1	0.0793	0.577	0.985	1	1	0.668
TR18899|c2_g2_i2	AT2G39700.1 | Symbols: ATEXPA4, ATEXP4, ATHEXP ALPHA 1.6, EXPA4 | expansin A4 | chr2:16544246-16545434 REVERSE LENGTH=257	-2.72	-0.589	-0.632	-0.332	-1.16	-0.775	0.397	-0.498	-0.047	-0.627	0.000458	0.805	0.536	1	0.0198	0.618	0.747	0.89	1	0.478
TR18907|c0_g1_i4	AT4G25970.1 | Symbols: PSD3 | phosphatidylserine decarboxylase 3 | chr4:13184240-13189139 FORWARD LENGTH=635	2.85	1.54	0.611	0.0379	0.666	-0.479	-0.0909	-0.831	0.151	0.292	0.0157	0.131	0.742	1	0.386	0.889	0.989	0.823	1	0.917
TR18923|c1_g1_i8	AT2G46520.1 | Symbols: | cellular apoptosis susceptibility protein, putative / importin-alpha re-exporter, putative | chr2:19096867-19099785 FORWARD LENGTH=972	-4.74	-0.471	-0.964	-1.71	-1.59	-0.128	-0.552	0.0842	-0.206	0.546	0.0153	1	0.768	0.46	0.218	0.996	0.89	1	1	0.903
TR18939|c2_g4_i4	AT2G19270.1 | Symbols: | CONTAINS InterPro DOMAIN/s: Mitotic checkpoint protein PRCC, C-terminal (InterPro:IPR018800); Has 930 Blast hits to 533 proteins in 146 species: Archae - 0; Bacteria - 18; Metazoa - 327; Fungi - 143; Plants - 61; Viruses - 0; Other Eukaryotes - 381 (source: NCBI BLink). | chr2:8360349-8361907 REVERSE LENGTH=359	-1.7	-0.493	-0.124	-0.138	-0.946	0.556	-0.13	0.292	0.00111	0.392	0.0494	0.891	0.972	1	0.0453	0.724	0.953	1	1	0.708
TR18941|c1_g1_i1	No informative hit E<10-6	3.77	0.821	-0.231	-0.317	3.5	-0.657	-0.216	-0.28	-0.0436	-0.117	0.0594	0.998	0.98	1	0.000703	0.893	0.969	1	1	0.988
TR18941|c1_g1_i3	No informative hit E<10-6	5.24	1.37	0.523	-0.279	3.63	-0.149	0.247	-0.948	0.111	0.441	0.00919	0.786	0.935	1	0.000978	0.992	0.968	0.994	1	0.918
TR18964|c3_g2_i5	AT1G63700.1 | Symbols: EMB71, YDA, MAPKKK4 | Protein kinase superfamily protein | chr1:23625208-23629031 REVERSE LENGTH=883	1.8	0.394	0.56	0.0238	0.825	0.877	0.449	0.187	0.0131	0.229	0.0387	0.996	0.642	1	0.075	0.558	0.686	1	1	0.897
TR18969|c0_g1_i3	AT3G14400.1 | Symbols: UBP25 | ubiquitin-specific protease 25 | chr3:4811953-4815210 REVERSE LENGTH=661	-1.3	-0.342	-0.207	0.0289	-0.779	-0.00672	-0.307	0.227	0.232	-0.158	0.0807	0.971	0.915	1	0.0458	1	0.768	1	1	0.917
TR18971|c0_g2_i4	AT1G16390.1 | Symbols: ATOCT3, 3-Oct | organic cation/carnitine transporter 3 | chr1:5602921-5604477 FORWARD LENGTH=518	-0.28	-0.268	-0.433	0.251	0.17	-1.17	-1.29	0.155	0.463	-0.501	0.908	1	0.854	1	0.879	0.567	0.0327	1	1	0.787
TR18973|c0_g1_i2	AT3G20500.1 | Symbols: ATPAP18, PAP18 | purple acid phosphatase 18 | chr3:7157926-7160244 FORWARD LENGTH=437	-2.17	-0.429	-0.116	-0.262	-1.37	-1.88	-0.441	-0.114	-0.981	-0.343	0.0823	1	0.986	1	0.0356	0.169	0.8	1	0.432	0.857
TR18978|c0_g1_i1	AT5G09800.1 | Symbols: | ARM repeat superfamily protein | chr5:3043123-3044352 REVERSE LENGTH=409	3.61	1.03	0.527	0.377	1.67	1.66	0.176	0.756	0.305	0.423	0.0324	0.842	0.901	1	0.0714	0.574	0.976	1	1	0.903
TR18983|c4_g1_i1	AT1G79430.2 | Symbols: APL, WDY | Homeodomain-like superfamily protein | chr1:29877521-29879135 REVERSE LENGTH=358	-2.77	-0.315	-0.583	-0.913	-0.962	-1.17	-0.231	0.309	-0.758	-0.491	0.0104	1	0.782	0.452	0.118	0.546	0.939	1	0.743	0.751
TR18983|c4_g5_i11	AT1G79430.2 | Symbols: APL, WDY | Homeodomain-like superfamily protein | chr1:29877521-29879135 REVERSE LENGTH=358	-1.83	-0.21	-0.286	-0.468	-0.865	-0.606	0.0346	0.273	-0.375	-0.538	0.0408	1	0.901	0.906	0.0651	0.742	0.995	1	0.992	0.557
TR18991|c1_g1_i5	AT1G32860.1 | Symbols: | Glycosyl hydrolase superfamily protein | chr1:11907308-11908803 REVERSE LENGTH=426	-1.13	-0.0363	-0.388	-0.209	-0.501	-2.21	-0.884	0.0401	-0.696	-0.667	0.286	1	0.82	1	0.407	0.00627	0.094	1	0.539	0.384
TR18993|c1_g1_i2	AT1G65450.1 | Symbols: | HXXXD-type acyl-transferase family protein | chr1:24315875-24318895 FORWARD LENGTH=450	0.494	-0.186	0.15	-0.438	0.968	2.24	0.09	0.253	0.733	1.17	0.742	1	0.97	0.983	0.0453	0.0155	0.98	1	0.582	0.0197
TR18995|c3_g2_i5	AT3G08860.1 | Symbols: PYD4 | PYRIMIDINE 4 | chr3:2696754-2699087 REVERSE LENGTH=481	21.5	2.67	6.59	5.63	6.62	-7.97	-5.83	1.91	-1.47	-2.58	0.0265	1	0.649	0.847	0.292	1	0.569	1	1	0.878
TR19029|c3_g1_i1	No informative hit E<10-6	-2.11	-0.23	1.05	-0.241	-2.69	0.355	0.773	0.36	0.376	-1.15	0.539	1	0.831	1	0.0452	0.972	0.865	1	1	0.746
TR19033|c0_g1_i2	AT3G23660.1 | Symbols: | Sec23/Sec24 protein transport family protein | chr3:8513666-8517729 REVERSE LENGTH=765	-0.514	-0.0335	0.0809	0.129	-0.691	-0.111	-0.309	0.0552	0.044	0.0995	0.537	1	0.977	1	0.0428	0.957	0.681	1	1	0.948
TR19052|c0_g1_i1	AT5G23950.1 | Symbols: | Calcium-dependent lipid-binding (CaLB domain) family protein | chr5:8082789-8083448 FORWARD LENGTH=219	2.65	1.41	0.721	-0.0728	0.589	0.867	2.34	0.645	-0.404	-1.71	0.21	0.523	0.878	1	0.646	0.832	0.00605	1	1	0.146
TR19052|c0_g1_i4	AT5G23950.1 | Symbols: | Calcium-dependent lipid-binding (CaLB domain) family protein | chr5:8082789-8083448 FORWARD LENGTH=219	3.27	2.06	1.14	-0.494	0.556	0.915	2.91	0.195	-0.645	-1.54	0.135	0.227	0.738	1	0.699	0.845	0.00223	1	1	0.335
TR19052|c0_g1_i5	AT5G23950.1 | Symbols: | Calcium-dependent lipid-binding (CaLB domain) family protein | chr5:8082789-8083448 FORWARD LENGTH=219	3.06	1.42	0.706	-0.446	1.38	2.1	3.49	1.02	-0.745	-1.66	0.429	0.964	0.951	1	0.462	0.708	0.0367	1	1	0.619
TR19055|c2_g1_i1	AT3G61870.1 | Symbols: | unknown protein; FUNCTIONS IN: molecular_function unknown; INVOLVED IN: biological_process unknown; LOCATED IN: chloroplast, chloroplast inner membrane, chloroplast envelope; EXPRESSED IN: 23 plant structures; EXPRESSED DURING: 14 growth stages; Has 200 Blast hits to 200 proteins in 73 species: Archae - 0; Bacteria - 112; Metazoa - 0; Fungi - 0; Plants - 53; Viruses - 0; …	1.74	0.736	0.429	0.181	0.398	0.617	0.209	0.235	0.145	0.0281	0.0141	0.29	0.709	1	0.372	0.656	0.894	1	1	0.995
TR19060|c3_g1_i2	AT3G51780.1 | Symbols: ATBAG4, BAG4 | BCL-2-associated athanogene 4 | chr3:19207029-19208178 REVERSE LENGTH=269	2.25	0.756	0.631	0.432	0.432	0.961	0.82	-0.218	0.423	-0.0625	0.0149	0.585	0.63	0.992	0.475	0.545	0.231	1	0.985	0.985
TR19062|c1_g1_i1	AT4G36220.1 | Symbols: FAH1, CYP84A1 | ferulic acid 5-hydroxylase 1 | chr4:17137584-17139619 REVERSE LENGTH=520	2.5	0.899	0.81	0.411	0.382	4.02	0.835	1.8	0.62	0.766	0.177	0.938	0.791	1	0.762	0.0125	0.7	0.232	1	0.73
TR19062|c1_g1_i2	AT4G36220.1 | Symbols: FAH1, CYP84A1 | ferulic acid 5-hydroxylase 1 | chr4:17137584-17139619 REVERSE LENGTH=520	3.15	0.54	1.64	0.607	0.364	4.72	1.52	0.881	0.716	1.6	0.000392	0.946	0.00339	0.849	0.596	1.82e-09	0.0024	0.556	0.741	0.000633
TR19062|c1_g1_i3	AT4G36220.1 | Symbols: FAH1, CYP84A1 | ferulic acid 5-hydroxylase 1 | chr4:17137584-17139619 REVERSE LENGTH=520	0.94	0.223	0.968	0.782	-1.03	5.91	1.19	-0.286	1.01	3.99	0.864	1	0.913	1	0.619	0.124	0.821	1	1	0.0405
TR19067|c0_g1_i10	AT2G43560.1 | Symbols: | FKBP-like peptidyl-prolyl cis-trans isomerase family protein | chr2:18073995-18075385 REVERSE LENGTH=223	2.4	0.82	0.259	0.547	0.776	0.709	-0.222	-0.137	0.975	0.0919	0.0479	0.763	0.95	0.983	0.263	0.792	0.946	1	0.53	0.982
TR19069|c0_g1_i4	AT3G01180.1 | Symbols: AtSS2, SS2 | starch synthase 2 | chr3:62456-65678 REVERSE LENGTH=792	-2.54	-0.446	-0.978	0.377	-1.5	-1.57	-0.484	0.0774	0.155	-1.32	0.0789	1	0.599	1	0.0362	0.461	0.837	1	1	0.125
TR19074|c1_g2_i4	No informative hit E<10-6	-8.1	-3.81	0	-2.08	-2.21	6.63	5.35	-0.492	0.772	0.999	1	0.791	1	1	0.636	0.236	0.0498	1	1	0.882
TR19075|c1_g1_i1	AT3G05060.1 | Symbols: | NOP56-like pre RNA processing ribonucleoprotein | chr3:1413174-1415564 REVERSE LENGTH=533	1.49	0.0682	-0.0924	-0.546	2.06	0.947	-0.269	0.498	0.37	0.347	0.367	1	0.993	1	0.00164	0.73	0.939	1	1	0.899
TR19075|c1_g1_i2	AT3G05060.1 | Symbols: | NOP56-like pre RNA processing ribonucleoprotein | chr3:1413174-1415564 REVERSE LENGTH=533	0.918	0.089	0.0158	-0.445	1.26	-0.145	-0.654	0.34	0.339	-0.17	0.588	1	1	1	0.0497	0.978	0.656	1	1	0.96
TR19075|c1_g1_i5	AT3G05060.1 | Symbols: | NOP56-like pre RNA processing ribonucleoprotein | chr3:1413174-1415564 REVERSE LENGTH=533	1.99	0.828	-0.66	0.192	1.63	0.848	-0.166	0.546	0.587	-0.12	0.18	0.858	0.769	1	0.0194	0.771	0.969	1	0.986	0.98
TR19080|c1_g2_i5	AT1G19970.1 | Symbols: | ER lumen protein retaining receptor family protein | chr1:6931194-6932597 REVERSE LENGTH=272	0.405	-0.527	-0.0668	-0.772	1.77	-0.0496	0.8	-0.867	-0.0501	0.0668	0.884	1	0.998	0.915	0.0173	1	0.647	0.89	1	0.993
TR19082|c0_g1_i1	AT2G15490.3 | Symbols: UGT73B4 | UDP-glycosyltransferase 73B4 | chr2:6761750-6763398 FORWARD LENGTH=481	5.94	1.24	1.56	0.279	2.86	4.77	2	0.654	1.08	1.04	0.000392	0.814	0.449	1	0.00314	0.00725	0.101	1	0.88	0.641
TR19082|c0_g1_i2	AT2G15490.3 | Symbols: UGT73B4 | UDP-glycosyltransferase 73B4 | chr2:6761750-6763398 FORWARD LENGTH=481	5.02	1.46	0.998	0.65	1.92	8.49	2.81	2.06	1.39	2.23	8.81e-05	0.275	0.64	1	0.00855	6.44e-12	0.000194	0.0323	0.413	0.0411
TR19082|c0_g1_i4	AT3G46660.1 | Symbols: UGT76E12 | UDP-glucosyl transferase 76E12 | chr3:17189406-17190862 REVERSE LENGTH=458	5.04	1.21	1.35	0.79	1.68	6.67	0.427	1.59	2.63	2.02	0.00392	0.807	0.572	1	0.0888	4.18e-05	0.928	0.551	0.0506	0.157
TR19083|c0_g1_i6	AT1G54400.1 | Symbols: | HSP20-like chaperones superfamily protein | chr1:20307667-20308768 FORWARD LENGTH=183	-12.1	-3.95	-1.15	-5.16	-1.82	-0.155	0.688	-0.0212	-0.0599	-0.762	0.021	0.745	0.94	0.376	0.632	1	0.962	1	1	0.947
TR19096|c0_g1_i2	AT1G70590.1 | Symbols: | F-box family protein | chr1:26618403-26620159 FORWARD LENGTH=351	-4.28	-0.476	-1.32	-0.512	-1.97	0.664	0.612	0.36	-0.313	0.00384	0.00154	1	0.463	1	0.0166	0.834	0.705	1	1	1
TR19793|c0_g1_i3	AT5G50290.1 | Symbols: | unknown protein; FUNCTIONS IN: molecular_function unknown; INVOLVED IN: biological_process unknown; LOCATED IN: endomembrane system; BEST Arabidopsis thaliana protein match is: unknown protein (TAIR:AT3G17350.1); Has 300 Blast hits to 300 proteins in 14 species: Archae - 0; Bacteria - 0; Metazoa - 0; Fungi - 0; Plants - 300; Viruses - 0; Other Eukaryotes - 0 (source: NCBI…	-2.56	0.0358	-0.881	-0.652	-1.06	-1.71	-0.508	-0.0895	-0.693	-0.417	0.0319	1	0.54	0.837	0.127	0.282	0.778	1	0.838	0.823
TR19814|c1_g1_i1	AT3G01680.1 | Symbols: | CONTAINS InterPro DOMAIN/s: Mediator complex subunit Med28 (InterPro:IPR021640); BEST Arabidopsis thaliana protein match is: unknown protein (TAIR:AT3G01670.1); Has 122 Blast hits to 112 proteins in 13 species: Archae - 0; Bacteria - 0; Metazoa - 0; Fungi - 0; Plants - 122; Viruses - 0; Other Eukaryotes - 0 (source: NCBI BLink). | chr3:252033-255246 FORWARD LENGTH=740	-2.48	-0.17	-0.708	-0.539	-1.06	-1.51	-0.134	-0.0568	-0.674	-0.641	0.000805	1	0.419	0.776	0.00987	0.131	0.957	1	0.534	0.359
TR19814|c1_g1_i3	AT3G01680.1 | Symbols: | CONTAINS InterPro DOMAIN/s: Mediator complex subunit Med28 (InterPro:IPR021640); BEST Arabidopsis thaliana protein match is: unknown protein (TAIR:AT3G01670.1); Has 122 Blast hits to 112 proteins in 13 species: Archae - 0; Bacteria - 0; Metazoa - 0; Fungi - 0; Plants - 122; Viruses - 0; Other Eukaryotes - 0 (source: NCBI BLink). | chr3:252033-255246 FORWARD LENGTH=740	-1.78	-0.033	-0.276	-0.849	-0.625	-0.883	-0.0134	-0.0045	-0.373	-0.492	0.0362	1	0.899	0.27	0.188	0.534	1	1	0.986	0.584
TR19814|c1_g1_i4	AT3G01680.1 | Symbols: | CONTAINS InterPro DOMAIN/s: Mediator complex subunit Med28 (InterPro:IPR021640); BEST Arabidopsis thaliana protein match is: unknown protein (TAIR:AT3G01670.1); Has 122 Blast hits to 112 proteins in 13 species: Archae - 0; Bacteria - 0; Metazoa - 0; Fungi - 0; Plants - 122; Viruses - 0; Other Eukaryotes - 0 (source: NCBI BLink). | chr3:252033-255246 FORWARD LENGTH=740	-3.84	-0.829	-0.717	-0.769	-1.52	-1.83	-0.0862	0.504	-1.04	-1.21	4.67e-05	0.702	0.648	0.619	0.00927	0.177	0.984	0.991	0.318	0.0603
TR19819|c0_g1_i7	AT4G02990.1 | Symbols: | Mitochondrial transcription termination factor family protein | chr4:1322158-1323783 FORWARD LENGTH=541	1.28	0.259	0.0245	0.122	0.877	0.237	-0.0522	0.094	0.186	0.00859	0.0922	1	1	1	0.0199	0.905	0.986	1	1	1
TR19835|c2_g1_i1	AT1G53910.3 | Symbols: RAP2.12 | related to AP2 12 | chr1:20135242-20136581 FORWARD LENGTH=356	-2.52	-0.21	-0.275	-0.24	-1.79	-1.37	-0.665	-0.0621	-0.177	-0.466	0.0266	1	0.941	1	0.00131	0.447	0.615	1	1	0.782
TR19835|c2_g1_i2	AT1G53910.3 | Symbols: RAP2.12 | related to AP2 12 | chr1:20135242-20136581 FORWARD LENGTH=356	-1.35	-0.275	0.308	-0.121	-1.26	0.0158	-0.73	0.768	-0.444	0.422	0.37	1	0.935	1	0.0497	1	0.595	0.844	1	0.837
TR19835|c2_g1_i3	AT1G53910.3 | Symbols: RAP2.12 | related to AP2 12 | chr1:20135242-20136581 FORWARD LENGTH=356	-1.84	-0.104	-0.333	-0.00949	-1.39	-1.3	-0.512	-0.223	-0.173	-0.391	0.121	1	0.906	1	0.0137	0.457	0.75	1	1	0.834
TR19843|c1_g1_i3	AT2G22140.1 | Symbols: ATEME1B, EME1B | essential meiotic endonuclease 1B | chr2:9414895-9418584 REVERSE LENGTH=551	2.99	0.227	-0.633	0.357	3.04	-0.153	-0.987	-0.801	-0.557	2.19	0.232	1	0.908	1	0.0107	0.995	0.741	1	1	0.17
TR19845|c7_g2_i1	AT2G37150.2 | Symbols: | RING/U-box superfamily protein | chr2:15603748-15605988 REVERSE LENGTH=546	1.54	0.396	0.251	-0.302	1.19	0.0939	0.899	-0.557	-0.0287	-0.22	0.236	1	0.954	1	0.024	0.991	0.421	1	1	0.935
TR19846|c1_g1_i1	AT2G34630.2 | Symbols: GPPS, GPS1 | geranyl diphosphate synthase 1 | chr2:14578689-14581632 FORWARD LENGTH=422	2.21	0.427	1.07	0.215	0.493	0.358	0.13	0.584	-0.29	-0.0662	0.0175	0.995	0.149	1	0.418	0.895	0.966	0.887	1	0.987
TR19875|c0_g2_i6	AT4G27760.1 | Symbols: FEY, FEY3 | NAD(P)-binding Rossmann-fold superfamily protein | chr4:13844151-13846563 FORWARD LENGTH=376	-1.84	-0.135	0.535	-0.838	-1.4	0.588	0.249	0.228	0.0103	0.101	0.104	1	0.752	0.497	0.0146	0.781	0.914	1	1	0.973
TR19877|c3_g1_i3	AT4G18950.1 | Symbols: | Integrin-linked protein kinase family | chr4:10375685-10378129 FORWARD LENGTH=459	-2.46	-0.155	-0.328	0.0619	-2.04	-1.07	-0.479	-0.183	0.105	-0.511	0.0321	1	0.9	1	0.00261	0.528	0.718	1	1	0.739
TR19877|c3_g1_i4	AT4G18950.1 | Symbols: | Integrin-linked protein kinase family | chr4:10375685-10378129 FORWARD LENGTH=459	-2.94	-0.421	-0.873	-0.255	-1.39	-0.726	-0.375	-0.0946	-0.183	-0.0729	0.00679	1	0.456	1	0.046	0.75	0.839	1	1	0.988
TR19967|c1_g2_i6	AT3G22810.1 | Symbols: | Plant protein of unknown function (DUF828) with plant pleckstrin homology-like region | chr3:8068595-8071559 FORWARD LENGTH=472	-1.29	0.448	-0.21	-0.0253	-1.5	0.437	0.685	0.0497	0.15	-0.448	0.424	1	0.965	1	0.0441	0.876	0.54	1	1	0.77
TR19971|c3_g1_i5	AT5G64400.2 | Symbols: | BEST Arabidopsis thaliana protein match is: Cox19-like CHCH family protein (TAIR:AT5G09570.1); Has 127 Blast hits to 125 proteins in 40 species: Archae - 0; Bacteria - 9; Metazoa - 16; Fungi - 2; Plants - 64; Viruses - 0; Other Eukaryotes - 36 (source: NCBI BLink). | chr5:25748922-25749947 FORWARD LENGTH=162	-2.97	-1.43	0.0193	-0.11	-1.45	0.233	0.129	0.343	-0.293	0.0543	0.0333	0.252	1	1	0.0527	0.964	0.981	1	1	0.995
TR19977|c4_g1_i3	AT2G26310.1 | Symbols: | Chalcone-flavanone isomerase family protein | chr2:11201770-11203919 FORWARD LENGTH=398	2.02	0.0599	-0.0773	0.282	1.75	0.124	0.855	-0.421	0.0984	-0.408	0.307	1	0.998	1	0.0433	0.992	0.675	1	1	0.903
TR19986|c3_g1_i1	AT1G53350.1 | Symbols: | Disease resistance protein (CC-NBS-LRR class) family | chr1:19903899-19907515 FORWARD LENGTH=927	11.6	0.346	6.48	7.42	-2.61	-0.811	-2.16	-0.00214	2.16	-0.806	0.0322	1	0.212	0.107	0.392	0.95	0.796	1	0.963	0.958
TR19988|c0_g1_i5	AT2G17200.1 | Symbols: DSK2 | ubiquitin family protein | chr2:7482133-7485090 REVERSE LENGTH=551	-1.28	0.00769	-0.207	0.0414	-1.12	-0.26	-0.156	0.202	-0.283	-0.0237	0.113	1	0.923	1	0.00581	0.89	0.927	1	0.999	0.996
TR19999|c0_g3_i2	AT4G21660.2 | Symbols: | proline-rich spliceosome-associated (PSP) family protein | chr4:11506259-11509772 REVERSE LENGTH=598	-1.67	-0.00707	-0.322	-0.248	-1.09	-1.05	-0.412	0.0991	-0.328	-0.412	0.0141	1	0.8	1	0.00265	0.245	0.565	1	0.958	0.582
TR20015|c2_g4_i1	AT2G40420.1 | Symbols: | Transmembrane amino acid transporter family protein | chr2:16877300-16878982 FORWARD LENGTH=440	-2.85	-0.588	0.0676	-0.474	-1.86	1.22	0.341	0.325	0.147	0.411	0.0834	1	0.998	1	0.0498	0.648	0.917	1	1	0.893
TR20018|c0_g6_i1	AT2G36570.1 | Symbols: | Leucine-rich repeat protein kinase family protein | chr2:15335583-15337725 FORWARD LENGTH=672	-2.92	-0.67	-1.03	-0.354	-0.862	-2.03	-0.517	0.623	-1.08	-1.05	0.0405	0.991	0.584	1	0.324	0.193	0.786	0.968	0.397	0.272
TR20067|c1_g1_i1	AT1G20760.1 | Symbols: | Calcium-binding EF hand family protein | chr1:7209515-7214773 FORWARD LENGTH=1019	-15.6	-3.27	-7.23	-6.28	1.21	5.08	-0.242	0.761	1.33	3.22	0.0323	0.986	0.413	0.609	0.824	0.701	0.996	1	1	0.743
TR20067|c1_g1_i2	AT1G21630.1 | Symbols: | Calcium-binding EF hand family protein | chr1:7581457-7587796 FORWARD LENGTH=1218	-2.58	-0.464	-1.4	-0.606	-0.108	-0.735	-0.559	-0.00112	-0.191	0.0164	0.0461	1	0.175	0.959	0.936	0.783	0.742	1	1	1
TR20067|c1_g1_i8	AT1G21630.1 | Symbols: | Calcium-binding EF hand family protein | chr1:7581457-7587796 FORWARD LENGTH=1218	-2.35	-0.629	-1.21	-0.417	-0.096	-1.68	-0.663	-0.328	-0.544	-0.143	0.0375	0.844	0.193	1	0.94	0.214	0.499	1	0.933	0.962
TR20068|c0_g1_i5	AT1G65090.1 | Symbols: | unknown protein; BEST Arabidopsis thaliana protein match is: unknown protein (TAIR:AT5G36100.1); Has 1435 Blast hits to 1033 proteins in 192 species: Archae - 0; Bacteria - 61; Metazoa - 511; Fungi - 123; Plants - 100; Viruses - 42; Other Eukaryotes - 598 (source: NCBI BLink). | chr1:24181187-24182668 REVERSE LENGTH=246	3.87	1.34	0.842	1	0.686	-0.196	0.666	0.626	-1.02	-0.467	0.0293	0.671	0.797	0.894	0.562	0.981	0.828	1	0.884	0.889
TR20069|c1_g4_i2	AT1G04910.1 | Symbols: | O-fucosyltransferase family protein | chr1:1388101-1391074 REVERSE LENGTH=519	-3.11	-0.279	-1.33	-0.119	-1.38	-0.765	-0.262	-0.0853	-0.191	-0.227	0.00665	1	0.0638	1	0.121	0.697	0.901	1	1	0.923
TR20070|c1_g1_i2	AT1G52190.1 | Symbols: | Major facilitator superfamily protein | chr1:19434671-19438673 FORWARD LENGTH=607	-0.237	0.531	-0.0298	-0.377	-0.362	-2.72	-0.0802	-0.738	-0.167	-1.73	0.944	1	1	1	0.734	0.0837	0.991	0.947	1	0.0206
TR20097|c0_g5_i1	AT5G08680.1 | Symbols: | ATP synthase alpha/beta family protein | chr5:2821992-2824683 FORWARD LENGTH=559	-1.59	-0.0716	-0.271	-0.0401	-1.21	-0.531	-0.0841	-0.0632	-0.163	-0.221	0.0727	1	0.9	1	0.00411	0.77	0.978	1	1	0.892
TR20097|c0_g5_i10	AT5G08680.1 | Symbols: | ATP synthase alpha/beta family protein | chr5:2821992-2824683 FORWARD LENGTH=559	-1.67	-0.0191	-0.23	-0.253	-1.17	-0.56	-0.103	0.00703	-0.161	-0.303	0.0547	1	0.925	1	0.0073	0.749	0.97	1	1	0.828
TR20097|c0_g5_i2	AT5G08680.1 | Symbols: | ATP synthase alpha/beta family protein | chr5:2821992-2824683 FORWARD LENGTH=559	-1.32	-0.0338	-0.19	-0.0993	-1	-0.0711	-0.00924	0.00588	-0.202	0.135	0.218	1	0.955	1	0.0429	0.992	1	1	1	0.957
TR20097|c0_g5_i5	AT5G08680.1 | Symbols: | ATP synthase alpha/beta family protein | chr5:2821992-2824683 FORWARD LENGTH=559	-1.22	-0.17	-0.224	0.125	-0.946	-0.288	0.165	0.089	-0.0602	-0.482	0.192	1	0.926	1	0.0271	0.899	0.94	1	1	0.59
TR20097|c0_g5_i8	AT5G08680.1 | Symbols: | ATP synthase alpha/beta family protein | chr5:2821992-2824683 FORWARD LENGTH=559	-1.45	-0.0712	-0.346	0.0242	-1.06	-0.342	0.0603	0.00167	-0.153	-0.251	0.179	1	0.878	1	0.0342	0.898	0.989	1	1	0.892
TR20100|c0_g1_i5	AT5G44450.1 | Symbols: | methyltransferases | chr5:17914360-17916017 REVERSE LENGTH=334	2.68	-0.379	0.198	0.648	2.22	0.273	-0.271	0.433	-0.155	0.266	0.0976	1	0.977	1	0.00262	0.959	0.947	1	1	0.942
TR20100|c0_g1_i9	AT5G44450.1 | Symbols: | methyltransferases | chr5:17914360-17916017 REVERSE LENGTH=334	1.58	-0.231	-0.0203	0.401	1.43	0.253	0.219	0.122	-0.194	0.107	0.22	1	1	1	0.0157	0.943	0.938	1	1	0.977
TR20105|c1_g1_i1	AT1G64140.1 | Symbols: | BEST Arabidopsis thaliana protein match is: loricrin-related (TAIR:AT5G64550.1); Has 3596 Blast hits to 2004 proteins in 150 species: Archae - 0; Bacteria - 54; Metazoa - 1597; Fungi - 38; Plants - 513; Viruses - 9; Other Eukaryotes - 1385 (source: NCBI BLink). | chr1:23804069-23806009 REVERSE LENGTH=646	0.885	-0.00864	0.424	0.358	0.111	1.12	0.953	0.166	-0.133	0.136	0.314	1	0.714	0.948	0.864	0.234	0.00825	1	1	0.935
TR20110|c6_g1_i2	AT5G59400.1 | Symbols: | FUNCTIONS IN: molecular_function unknown; INVOLVED IN: biological_process unknown; LOCATED IN: chloroplast; EXPRESSED IN: 23 plant structures; EXPRESSED DURING: 13 growth stages; BEST Arabidopsis thaliana protein match is: PGR5-like B (TAIR:AT4G11960.1); Has 97 Blast hits to 97 proteins in 19 species: Archae - 0; Bacteria - 0; Metazoa - 0; Fungi - 0; Plants - 97; Viruses …	1.75	0.32	0.683	0.118	0.626	1.55	0.556	0.318	0.108	0.566	0.0242	1	0.398	1	0.142	0.0785	0.434	1	1	0.416
TR20112|c5_g1_i4	AT1G60950.1 | Symbols: FED A, ATFD2 | 2Fe-2S ferredoxin-like superfamily protein | chr1:22444565-22445011 FORWARD LENGTH=148	2.38	0.854	0.462	0.538	0.526	1.15	0.416	0.639	0.151	-0.0592	0.00935	0.448	0.791	0.894	0.365	0.451	0.781	0.807	1	0.988
TR20119|c1_g1_i2	AT2G42580.1 | Symbols: TTL3, VIT | tetratricopetide-repeat thioredoxin-like 3 | chr2:17728855-17731461 FORWARD LENGTH=691	-3.15	-0.947	-1.1	-0.0167	-1.09	-0.121	0.0435	0.00851	-0.0535	-0.119	0.0234	0.719	0.448	1	0.247	0.986	0.996	1	1	0.979
TR20125|c2_g4_i1	No informative hit E<10-6	-4.13	-0.894	-0.748	-1.25	-1.24	-1.59	-0.246	0.623	-1.56	-0.403	0.0048	0.917	0.797	0.502	0.165	0.566	0.962	1	0.3	0.896
TR20135|c1_g3_i1	AT2G20420.1 | Symbols: | ATP citrate lyase (ACL) family protein | chr2:8805574-8807858 FORWARD LENGTH=421	-1.61	-0.199	-0.253	-0.331	-0.827	-0.519	-0.113	0.14	-0.163	-0.382	0.031	1	0.89	0.992	0.0352	0.731	0.96	1	1	0.679
TR20139|c2_g2_i1	AT1G13440.1 | Symbols: GAPC-2, GAPC2 | glyceraldehyde-3-phosphate dehydrogenase C2 | chr1:4608465-4610494 REVERSE LENGTH=338	6.59	2.67	3	0.7	0.227	7.8	2.07	1.84	2.19	1.71	2.32e-07	0.00107	0.000516	0.995	0.867	9.05e-11	0.021	0.15	0.018	0.0873
TR20139|c2_g2_i2	AT1G13440.1 | Symbols: GAPC-2, GAPC2 | glyceraldehyde-3-phosphate dehydrogenase C2 | chr1:4608465-4610494 REVERSE LENGTH=338	10	4.31	3.09	1.87	0.732	10.6	2.54	2.89	2.51	2.64	2.67e-20	1.44e-12	9.75e-06	0.07	0.447	3.02e-24	0.000104	6.43e-05	0.000545	5.15e-05
TR20139|c2_g2_i3	AT1G13440.1 | Symbols: GAPC-2, GAPC2 | glyceraldehyde-3-phosphate dehydrogenase C2 | chr1:4608465-4610494 REVERSE LENGTH=338	9.05	4.07	3.01	1.5	0.479	9.91	2.49	2.52	2.84	2.07	2.77e-13	1.59e-08	0.000516	0.378	0.682	3.54e-17	0.0015	0.00438	0.000545	0.0165
TR20145|c1_g1_i2	AT1G25450.1 | Symbols: KCS5, CER60 | 3-ketoacyl-CoA synthase 5 | chr1:8938679-8940282 REVERSE LENGTH=492	1.87	0.0539	0.803	-0.0623	1.08	3.1	-0.146	0.495	0.309	2.44	0.384	1	0.823	1	0.283	0.137	0.983	1	1	0.00512
TR20162|c1_g3_i1	AT1G08440.1 | Symbols: | Aluminium activated malate transporter family protein | chr1:2663027-2665343 FORWARD LENGTH=501	1.62	0.45	1.5	-1.4	1.07	1.89	1.98	1.08	-0.71	-0.457	0.47	1	0.398	0.641	0.239	0.5	0.0194	0.871	1	0.876
TR20166|c0_g1_i2	AT5G53440.1 | Symbols: | unknown protein; FUNCTIONS IN: molecular_function unknown; INVOLVED IN: biological_process unknown; LOCATED IN: cytosol; EXPRESSED IN: 25 plant structures; EXPRESSED DURING: 15 growth stages; Has 1807 Blast hits to 1807 proteins in 277 species: Archae - 0; Bacteria - 0; Metazoa - 736; Fungi - 347; Plants - 385; Viruses - 0; Other Eukaryotes - 339 (source: NCBI BLink). | c…	-2.19	-0.272	-0.698	0.074	-1.29	-1.15	-0.364	0.155	-0.28	-0.661	0.0599	1	0.662	1	0.0356	0.524	0.855	1	1	0.572
TR20181|c2_g2_i1	AT5G48485.1 | Symbols: DIR1 | Bifunctional inhibitor/lipid-transfer protein/seed storage 2S albumin superfamily protein | chr5:19646317-19646625 REVERSE LENGTH=102	-0.268	0.0371	-0.316	-0.839	0.85	5.29	1.95	1.76	1.23	0.348	0.959	1	0.971	1	0.507	0.00251	0.126	0.459	0.809	0.938
TR20184|c2_g1_i1	AT4G38350.1 | Symbols: | Patched family protein | chr4:17958324-17966846 REVERSE LENGTH=1273	-2.95	-0.93	-0.832	0.123	-1.31	-4.13	-0.543	-0.896	-0.451	-2.24	0.0596	0.787	0.71	1	0.183	0.000824	0.813	0.849	1	0.000742
TR20197|c4_g3_i1	No informative hit E<10-6	2.37	0.422	0.656	0.168	1.12	0.688	1.06	-0.608	0.0848	0.147	0.0323	1	0.724	1	0.0288	0.775	0.14	0.968	1	0.957
TR20204|c3_g2_i1	AT5G15250.1 | Symbols: FTSH6, ATFTSH6 | FTSH protease 6 | chr5:4950411-4952777 REVERSE LENGTH=688	1.08	0.728	0.126	-0.142	0.369	2.06	2.37	0.461	-1.08	0.309	0.759	1	0.994	1	0.82	0.645	0.0105	1	1	0.944
TR20204|c3_g2_i2	AT5G15250.1 | Symbols: FTSH6, ATFTSH6 | FTSH protease 6 | chr5:4950411-4952777 REVERSE LENGTH=688	2.13	0.833	0.264	-0.196	1.23	3.05	2.59	-0.0354	-0.255	0.751	0.39	0.986	0.974	1	0.232	0.228	0.00324	1	1	0.757
TR20204|c3_g2_i3	AT5G15250.1 | Symbols: FTSH6, ATFTSH6 | FTSH protease 6 | chr5:4950411-4952777 REVERSE LENGTH=688	2.19	0.937	0.0597	0.181	1.01	3.39	2.45	-0.0985	0.633	0.407	0.327	0.909	1	1	0.302	0.113	0.00216	1	1	0.897
TR20206|c3_g3_i2	AT4G22200.1 | Symbols: AKT2/3, AKT3, AKT2, KT2/3 | potassium transport 2/3 | chr4:11746666-11750091 REVERSE LENGTH=802	-3.01	-0.446	-0.975	-0.594	-0.999	-0.263	-0.045	0.462	-0.713	0.0325	0.0345	1	0.63	1	0.235	0.958	0.997	1	0.958	0.999
TR20220|c5_g1_i2	AT1G44820.1 | Symbols: | Peptidase M20/M25/M40 family protein | chr1:16926351-16928354 FORWARD LENGTH=438	-3.8	-0.136	-0.922	-0.521	-2.22	-0.0969	-0.158	0.376	-0.0564	-0.259	0.00961	1	0.666	1	0.0108	0.994	0.974	1	1	0.942
TR20230|c1_g2_i1	AT4G17260.1 | Symbols: | Lactate/malate dehydrogenase family protein | chr4:9674057-9675309 FORWARD LENGTH=353	-4.15	-0.652	-1.08	-0.422	-1.99	-0.472	-0.101	0.596	-0.556	-0.411	0.000152	0.957	0.436	1	0.00135	0.89	0.985	0.983	0.986	0.851
TR20259|c1_g1_i9	AT3G14770.1 | Symbols: SWEET2, AtSWEET2 | Nodulin MtN3 family protein | chr3:4957787-4959202 REVERSE LENGTH=236	2.02	0.913	0.722	-0.234	0.615	0.287	0.0666	0.144	-0.0362	0.113	0.0402	0.396	0.555	1	0.297	0.921	0.988	1	1	0.97
TR20265|c2_g2_i2	AT1G28110.2 | Symbols: SCPL45 | serine carboxypeptidase-like 45 | chr1:9804153-9806832 REVERSE LENGTH=461	2.23	-0.766	0.5	0.418	2.07	-1.6	-0.0385	-0.128	-0.613	-0.818	0.407	1	0.944	1	0.036	0.605	0.998	1	1	0.746
TR20273|c1_g2_i1	AT5G17980.1 | Symbols: | C2 calcium/lipid-binding plant phosphoribosyltransferase family protein | chr5:5953596-5956745 FORWARD LENGTH=1049	-3.76	0.0461	-0.839	-0.62	-2.35	0.0257	-0.0396	0.484	-0.417	-0.00105	0.03	1	0.79	1	0.0234	1	0.998	1	1	1
TR20282|c2_g2_i2	AT5G19900.1 | Symbols: | PRLI-interacting factor, putative | chr5:6728561-6730045 REVERSE LENGTH=494	-1.52	-0.153	-0.325	0.126	-1.16	-0.145	0.107	0.0362	-0.243	-0.0446	0.079	1	0.854	1	0.0071	0.958	0.965	1	1	0.99
TR20288|c1_g1_i3	AT4G37560.1 | Symbols: | Acetamidase/Formamidase family protein | chr4:17646489-17648457 FORWARD LENGTH=452	-1.25	-0.568	-0.222	0.561	-1.02	-2.28	-1.02	0.597	-1.01	-0.855	0.277	0.898	0.946	0.874	0.0467	0.0185	0.0995	0.873	0.25	0.227
TR20291|c3_g1_i7	AT4G03510.2 | Symbols: RMA1, ATRMA1 | RING membrane-anchor 1 | chr4:1557905-1558654 REVERSE LENGTH=249	0.41	0.41	-0.19	-0.109	0.298	1.89	1.72	-0.281	0.228	0.219	0.867	1	0.974	1	0.774	0.306	0.0105	1	1	0.947
TR20293|c1_g2_i1	AT2G37230.1 | Symbols: | Tetratricopeptide repeat (TPR)-like superfamily protein | chr2:15637177-15639450 REVERSE LENGTH=757	-2.31	-0.411	-0.83	-0.0518	-1.02	-0.231	-0.473	0.226	0.211	-0.195	0.0401	1	0.425	1	0.206	0.945	0.708	1	1	0.946
TR20298|c3_g1_i6	AT3G10740.1 | Symbols: ASD1, ARAF1, ARAF, ATASD1 | alpha-L-arabinofuranosidase 1 | chr3:3361031-3364573 REVERSE LENGTH=678	0.718	0.35	-0.115	0.259	0.224	1.46	0.0311	-0.683	0.0969	2.02	0.772	1	0.992	1	0.871	0.589	0.999	1	1	0.0159
TR20299|c1_g1_i1	AT5G03940.1 | Symbols: FFC, 54CP, CPSRP54, SRP54CP | chloroplast signal recognition particle 54 kDa subunit | chr5:1060265-1063257 REVERSE LENGTH=564	2.07	0.835	0.457	-0.0504	0.826	0.943	0.371	0.0488	0.33	0.192	0.0375	0.524	0.805	1	0.123	0.588	0.829	1	1	0.933
TR20303|c1_g1_i1	AT5G60450.1 | Symbols: ARF4 | auxin response factor 4 | chr5:24308558-24312187 REVERSE LENGTH=788	-2.89	-0.425	-0.344	-0.352	-1.77	-1.62	-0.223	-0.238	-0.596	-0.559	0.00406	1	0.891	1	0.00521	0.202	0.927	1	0.782	0.666
TR20306|c1_g1_i1	AT2G01980.1 | Symbols: SOS1, ATSOS1, ATNHX7 | sodium proton exchanger, putative (NHX7) (SOS1) | chr2:457070-463145 FORWARD LENGTH=1146	-1.58	-0.436	1.26	0.137	-2.54	0.323	-0.085	-0.106	0.331	0.183	0.46	1	0.502	1	0.00225	0.953	0.992	1	1	0.968
TR20318|c2_g4_i1	AT1G06490.1 | Symbols: ATGSL07, gsl07, atgsl7, GSL7 | glucan synthase-like 7 | chr1:1978762-1989295 FORWARD LENGTH=1958	-2.16	-0.197	-0.299	-0.369	-1.29	-1.16	-0.174	0.0194	-0.451	-0.554	0.00649	1	0.878	0.983	0.00225	0.324	0.936	1	0.9	0.487
[truncated: 3,209 more rows]
