# Supplementary material for: Using RNA-seq to characterize responses to 4-hydroxyphenylpyruvate dioxygenase (HPPD) inhibitor herbicide resistance in waterhemp (Amaranthus tuberculatus)
Source: BMC Plant Biol. 2019 May 6;19:182. doi: 10.1186/s12870-019-1795-x (PMC6501407; doi:10.1186/s12870-019-1795-x)
Supplement: Supplementary file 4 — dentification of waterhemp (Amaranthus tuberculatus) transcripts significantly (FDR < 0.05, [43]) differentially expressed in response to mesotrione treatment. edgeR was used to identify differentially expressed transcripts (DETs) responding to herbicide treatment relative to mock-treated controls within each genotype (herbicide resistant (R) and susceptible(S)) and at specific time points (3, 6, 12, and 24 h after treatment (HAT). (XLSX 18 kb) [file 12870_2019_1795_MOESM4_ESM.xlsx]

## Sheet: Sheet1
Additional file 5. Characterization of waterhemp (Amaranthus tuberculatus) differentially expressed transcripts (DETs) using gene ontology overrepresentation. A Fisher’s Exact Test [39] with a Bonferroni correction [40] was used to identify significantly (P < 0.05) overrepresented gene ontology biological process terms among DETs significant within a genotype at a particular time or across time, …
Genotype x Timepoint	GOBP Term	GOBP Description	Waterhemp v4 Transcriptome Count	DET Count	Corrected P-value
R03	GO:0042542	response to hydrogen peroxide	963	27	3.24098e-11
R03	GO:0009644	response to high light intensity	1170	27	2.75516e-09
R03	GO:0009408	response to heat	1266	28	3.08151e-09
R03	GO:0006457	protein folding	1328	27	4.46236e-08
R03	GO:0034976	response to endoplasmic reticulum stress	852	20	8.89456e-07
R03	GO:0000302	response to reactive oxygen species	211	10	1.16178e-05
R03	GO:0010286	heat acclimation	350	12	1.99639e-05
R03	GO:0012502	induction of programmed cell death	5	3	0.000167837
R03	GO:0006972	hyperosmotic response	593	13	0.000884868
R03	GO:0006879	cellular iron ion homeostasis	52	4	0.0175631
R03	GO:0009266	response to temperature stimulus	657	11	0.0492043
R06	NA	NA	NA	NA	NA
R12	NA	NA	NA	NA	NA
R24	GO:0006457	protein folding	1328	82	9.81366e-11
R24	GO:0009408	response to heat	1266	77	1.76423e-09
R24	GO:0046686	response to cadmium ion	2565	122	1.47683e-08
R24	GO:0042542	response to hydrogen peroxide	963	61	4.53497e-08
R24	GO:0009644	response to high light intensity	1170	66	1.01856e-06
R24	GO:0010021	amylopectin biosynthetic process	42	10	5.68388e-05
R24	GO:0071490	cellular response to far red light	10	5	0.00203607
R24	GO:0071491	cellular response to red light	10	5	0.00203607
R24	GO:0010286	heat acclimation	350	25	0.00265918
R24	GO:0010498	proteasomal protein catabolic process	498	30	0.013097
R24	GO:0006094	gluconeogenesis	968	47	0.0151653
R24	GO:0007010	cytoskeleton organization	608	33	0.0316397
All Resistant DETs	GO:0009407	toxin catabolic process	845	64	1.4567e-08
All Resistant DETs	GO:0005992	trehalose biosynthetic process	91	19	1.89121e-08
All Resistant DETs	GO:0006457	protein folding	1328	85	5.90266e-08
All Resistant DETs	GO:0009408	response to heat	1266	81	1.80769e-07
All Resistant DETs	GO:0010286	heat acclimation	350	35	4.98432e-07
All Resistant DETs	GO:0042542	response to hydrogen peroxide	963	64	4.32229e-06
All Resistant DETs	GO:0071398	cellular response to fatty acid	7	5	0.000451681
All Resistant DETs	GO:0009644	response to high light intensity	1170	67	0.000547977
All Resistant DETs	GO:0006351	transcription, DNA-templated	183	20	0.000586686
All Resistant DETs	GO:0010583	response to cyclopentenone	613	42	0.000835881
All Resistant DETs	GO:0009727	detection of ethylene stimulus	13	6	0.000952939
All Resistant DETs	GO:0009651	response to salt stress	3238	142	0.00501465
All Resistant DETs	GO:0080167	response to karrikin	618	39	0.0121988
All Resistant DETs	GO:0000302	response to reactive oxygen species	211	19	0.018871
All Resistant DETs	GO:0015760	glucose-6-phosphate transport	7	4	0.0250855
All Resistant DETs	GO:0034976	response to endoplasmic reticulum stress	852	48	0.0260415
All Resistant DETs	GO:0042178	xenobiotic catabolic process	14	5	0.036228
All Resistant DETs	GO:0010495	long-distance posttranscriptional gene silencing	14	5	0.036228
S03	GO:0042542	response to hydrogen peroxide	963	79	1.43472e-40
S03	GO:0009408	response to heat	1266	84	2.80984e-36
S03	GO:0006457	protein folding	1328	85	1.45029e-35
S03	GO:0009644	response to high light intensity	1170	78	9.81921e-34
S03	GO:0034976	response to endoplasmic reticulum stress	852	60	6.24253e-27
S03	GO:0010286	heat acclimation	350	25	1.04217e-10
S03	GO:0018131	oxazole or thiazole biosynthetic process	7	6	4.67385e-09
S03	GO:0009407	toxin catabolic process	845	35	1.57659e-08
S03	GO:0010117	photoprotection	37	9	8.07981e-08
S03	GO:0071490	cellular response to far red light	10	6	1.3635e-07
S03	GO:0071491	cellular response to red light	10	6	1.3635e-07
S03	GO:0010583	response to cyclopentenone	613	27	7.01486e-07
S03	GO:0043335	protein unfolding	13	6	1.08348e-06
S03	GO:0070370	cellular heat acclimation	39	8	3.6016e-06
S03	GO:0071492	cellular response to UV-A	18	6	1.11884e-05
S03	GO:0012502	induction of programmed cell death	5	4	2.84706e-05
S03	GO:0009228	thiamine biosynthetic process	22	6	4.33273e-05
S03	GO:0009809	lignin biosynthetic process	302	16	0.000122502
S03	GO:0034605	cellular response to heat	44	7	0.000196807
S03	GO:0046686	response to cadmium ion	2565	57	0.000289272
S03	GO:0071486	cellular response to high light intensity	34	6	0.000698658
S03	GO:0071483	cellular response to blue light	36	6	0.000993264
S03	GO:0042819	vitamin B6 biosynthetic process	25	5	0.00275935
S03	GO:0009718	anthocyanin-containing compound biosynthetic process	156	10	0.00386052
S03	GO:0009813	flavonoid biosynthetic process	276	13	0.00544816
S03	GO:0006879	cellular iron ion homeostasis	52	6	0.0089532
S03	GO:0000380	alternative mRNA splicing, via spliceosome	6	3	0.0103421
S03	GO:0080147	root hair cell development	33	5	0.0114691
S03	GO:0000413	protein peptidyl-prolyl isomerization	115	8	0.0167224
S03	GO:0018208	peptidyl-proline modification	127	8	0.0338034
S03	GO:0010501	RNA secondary structure unwinding	9	3	0.0423884
S03	GO:0032508	DNA duplex unwinding	9	3	0.0423884
S03	GO:0006970	response to osmotic stress	537	17	0.0452013
S03	GO:0042538	hyperosmotic salinity response	590	18	0.0456526
S06	GO:0006879	cellular iron ion homeostasis	52	3	0.0295777
S06	GO:0018874	benzoate metabolic process	13	2	0.0470373
S06	GO:0051707	response to other organism	400	6	0.0478391
S12	GO:0009407	toxin catabolic process	845	9	0.0165297
S12	GO:0018874	benzoate metabolic process	13	2	0.0431089
S24	GO:0019287	isopentenyl diphosphate biosynthetic process, mevalonate pathway	13	12	2.00751e-21
S24	GO:0019745	pentacyclic triterpenoid biosynthetic process	150	22	2.76581e-17
S24	GO:0016126	sterol biosynthetic process	815	42	4.50123e-16
S24	GO:0006457	protein folding	1328	51	2.10627e-14
S24	GO:0042542	response to hydrogen peroxide	963	43	3.09634e-14
S24	GO:0006085	acetyl-CoA biosynthetic process	34	12	7.0833e-14
S24	GO:0080055	low-affinity nitrate transport	34	11	3.99608e-12
S24	GO:0009408	response to heat	1266	45	2.13968e-11
S24	GO:0009644	response to high light intensity	1170	43	2.54302e-11
S24	GO:0006084	acetyl-CoA metabolic process	393	25	4.12884e-11
S24	GO:0034976	response to endoplasmic reticulum stress	852	31	9.73499e-08
S24	GO:0042398	cellular modified amino acid biosynthetic process	226	16	2.31066e-07
S24	GO:0006598	polyamine catabolic process	245	16	7.45416e-07
S24	GO:0009698	phenylpropanoid metabolic process	316	17	4.30375e-06
S24	GO:0016132	brassinosteroid biosynthetic process	450	20	5.66956e-06
S24	GO:0006821	chloride transport	36	7	1.56839e-05
S24	GO:0016125	sterol metabolic process	35	6	0.000332861
S24	GO:0010286	heat acclimation	350	15	0.000554853
S24	GO:0060964	regulation of gene silencing by miRNA	27	5	0.00190868
S24	GO:0008299	isoprenoid biosynthetic process	50	6	0.00289566
S24	GO:0012502	induction of programmed cell death	5	3	0.00324963
S24	GO:0006168	adenine salvage	16	4	0.00506047
S24	GO:0015713	phosphoglycerate transport	23	4	0.0233839
S24	GO:0046677	response to antibiotic	2	2	0.0357169
All Susceptible DETs	GO:0006457	protein folding	1328	99	3.20316e-28
All Susceptible DETs	GO:0042542	response to hydrogen peroxide	963	78	3.07097e-24
All Susceptible DETs	GO:0009408	response to heat	1266	89	1.88157e-23
All Susceptible DETs	GO:0009644	response to high light intensity	1170	81	8.22808e-21
All Susceptible DETs	GO:0009407	toxin catabolic process	845	63	1.6625e-17
All Susceptible DETs	GO:0034976	response to endoplasmic reticulum stress	852	62	1.08854e-16
All Susceptible DETs	GO:0010583	response to cyclopentenone	613	47	3.34411e-13
All Susceptible DETs	GO:0051131	chaperone-mediated protein complex assembly	22	12	5.17936e-13
All Susceptible DETs	GO:0019287	isopentenyl diphosphate biosynthetic process, mevalonate pathway	13	10	7.69852e-13
All Susceptible DETs	GO:0019745	pentacyclic triterpenoid biosynthetic process	150	19	3.66921e-08
All Susceptible DETs	GO:0046686	response to cadmium ion	2565	96	1.15338e-07
All Susceptible DETs	GO:0007005	mitochondrion organization	66	12	1.86706e-06
All Susceptible DETs	GO:0009651	response to salt stress	3238	108	4.77326e-06
All Susceptible DETs	GO:0016126	sterol biosynthetic process	815	40	2.53774e-05
All Susceptible DETs	GO:0010286	heat acclimation	350	24	3.51944e-05
All Susceptible DETs	GO:0042398	cellular modified amino acid biosynthetic process	226	19	3.56483e-05
All Susceptible DETs	GO:0009809	lignin biosynthetic process	302	22	4.32693e-05
All Susceptible DETs	GO:0006085	acetyl-CoA biosynthetic process	34	8	9.9987e-05
All Susceptible DETs	GO:0051707	response to other organism	400	25	0.000110736
All Susceptible DETs	GO:0006598	polyamine catabolic process	245	19	0.000126474
All Susceptible DETs	GO:0000024	maltose biosynthetic process	17	6	0.000260934
All Susceptible DETs	GO:0006084	acetyl-CoA metabolic process	393	24	0.000292979
All Susceptible DETs	GO:0012502	induction of programmed cell death	5	4	0.000367537
All Susceptible DETs	GO:0009805	coumarin biosynthetic process	348	22	0.000488221
All Susceptible DETs	GO:0009698	phenylpropanoid metabolic process	316	20	0.00149505
All Susceptible DETs	GO:0000302	response to reactive oxygen species	211	16	0.00151693
All Susceptible DETs	GO:0016132	brassinosteroid biosynthetic process	450	24	0.0030673
All Susceptible DETs	GO:0070370	cellular heat acclimation	39	7	0.00422611
All Susceptible DETs	GO:0002679	respiratory burst involved in defense response	461	24	0.00459039
All Susceptible DETs	GO:0009611	response to wounding	1593	56	0.00537331
All Susceptible DETs	GO:0009615	response to virus	195	14	0.0117872
All Susceptible DETs	GO:0009414	response to water deprivation	1381	49	0.0126483
All Susceptible DETs	GO:0006032	chitin catabolic process	19	5	0.0128327
All Susceptible DETs	GO:0080055	low-affinity nitrate transport	34	6	0.0217003
All Susceptible DETs	GO:0016125	sterol metabolic process	35	6	0.0257824
All Susceptible DETs	GO:0006879	cellular iron ion homeostasis	52	7	0.0298555
All Susceptible DETs	GO:0043620	regulation of DNA-templated transcription in response to stress	5	3	0.0395569
All Susceptible DETs	GO:0032107	regulation of response to nutrient levels	5	3	0.0395569
All Susceptible DETs	GO:0043335	protein unfolding	13	4	0.0467119
