# Supplementary material for: Using RNA-seq to characterize responses to 4-hydroxyphenylpyruvate dioxygenase (HPPD) inhibitor herbicide resistance in waterhemp (Amaranthus tuberculatus)
Source: BMC Plant Biol. 2019 May 6;19:182. doi: 10.1186/s12870-019-1795-x (PMC6501407; doi:10.1186/s12870-019-1795-x)
Supplement: Supplementary file 5 — Characterization of waterhemp (Amaranthus tuberculatus) differentially expressed transcripts (DETs) using gene ontology overrepresentation. A Fisher’s Exact Test [42] with a Bonferroni correction [43] was used to identify significantly (P < 0.05) overrepresented gene ontology biological process terms among DETs significant within a genotype at a particular time or across time, relative to all transcripts in the waterhemp v4 transcriptome. (XLSX 141 kb) [file 12870_2019_1795_MOESM5_ESM.xlsx]

## Sheet: Updated_cluster_annotation_expr
Additional file 6. Waterhemp (Amaranthus tuberculatus) differentially expressed transcripts (DETs) cluster relative to Amaranthus hypochondriacus genome. BLASTN (E<10^-20, [26]) was used to predict relative transcript location based on ortholog location in the grain amaranth genome (Phytozome v12.1, Amaranthus hypochondriacus v2.1, [32]). DETs were tested for overlap in a 100,000 bp window on cen…
DET Cluster Number	Average DET Cluster Position	Waterhemp transcriptome ID (version 4)	Differential Expression Genotype	Waterhemp Transcript Length (bp)	Top A. hypchondriacus 2.1 BLASTN Hit	A. hypchondriacus 2.1 Chromosome	A. hypchondriacus 2.1 Start Position	A. hypchondriacus 2.1 End Position	Top BLASTX Uniref100 Hit	E-value	Percent Identify (Amino Acid)	Most Informative Uniref100 Hit	E-value	Top RefBeet 1.2 BLASTX Hit	E-value	Percent Identity (Amino Acid)	Top A. thaliana BLASTX HIT (TAIRv10)	E-value	Percent Identity (Amino Acid)	GO Biological Process Terms	GO Biological Process Term Description	GO Molecular Function Terms	GO Molecular Function Term Description	logFC R	logFC R3	logFC R6	logFC R12	logFC R24	logFC S	logFC S3	logFC S6	logFC S12	logFC S24	FDR R	FDR R3	FDR R6	FDR R12	FDR R24	FDR S	FDR S3	FDR S6	FDR S12	FDR S24
1	1756642	TR37878|c0_g1_i6	Resistant	1360	AH000184	1	1735606	1741939	UniRef100_A0A0K9QFW5 Uncharacterized protein n=1 Tax=Spinacia oleracea RepID=A0A0K9QFW5_SPIOL	1e-166	87.08	UniRef100_A0A0B2SIE3 Glucan endo-1,3-beta-glucosidase 11 n=1 Tax=Glycine soja RepID=A0A0B2SIE3_GLYSO	6e-149	Bv9_207720_jnnq.t1 cDNAEvidence=100	3e-164	86.03	AT2G05790.1 | Symbols: | O-Glycosyl hydrolases family 17 protein | chr2:2199450-2201293 FORWARD LENGTH=472	6e-137	71.96	GO:0007389 GO:0008356 GO:0008361 GO:0009926 GO:0010015 GO:0010075 GO:0040007	pattern_specification_process asymmetric_cell_division regulation_of_cell_size auxin_polar_transport root_morphogenesis regulation_of_meristem_growth growth	GO:0004553	hydrolase_activity,_hydrolyzing_O-glycosyl_compounds	-2.33	-0.764	-0.119	0.294	-1.74	-1.2	-0.242	-0.0987	-0.62	-0.241	0.088	0.872	0.988	1	0.008	0.59	0.943	1	0.95	0.934
1	1756642	TR7855|c2_g2_i3	Resistant	582	AH000186	1	1754069	1759991	UniRef100_A0A0J8EH17 Uncharacterized protein n=1 Tax=Beta vulgaris subsp. vulgaris RepID=A0A0J8EH17_BETVU	2e-93	78.5	UniRef100_UPI000498D4C8 PREDICTED: uncharacterized protein LOC103423127 n=1 Tax=Malus domestica RepID=UPI000498D4C8	3e-59	Bv9_205260_hgen.t1 cDNAEvidence=100	8e-97	78.5	AT2G38970.1 | Symbols: | Zinc finger (C3HC4-type RING finger) family protein | chr2:16274135-16276651 FORWARD LENGTH=692	4e-45	53.69			GO:0004842 GO:0008270	ubiquitin-protein_transferase_activity zinc_ion_binding	-0.49	0.253	1.07	-0.455	-1.36	3.24	3.01	1.67	-1.4	-0.0403	0.953	1	0.902	1	0.604	0.369	0.043	0.806	0.78	1
1	1756642	TR7855|c2_g2_i3	Susceptible	582	AH000186	1	1754069	1759991	UniRef100_A0A0J8EH17 Uncharacterized protein n=1 Tax=Beta vulgaris subsp. vulgaris RepID=A0A0J8EH17_BETVU	2e-93	78.5	UniRef100_UPI000498D4C8 PREDICTED: uncharacterized protein LOC103423127 n=1 Tax=Malus domestica RepID=UPI000498D4C8	3e-59	Bv9_205260_hgen.t1 cDNAEvidence=100	8e-97	78.5	AT2G38970.1 | Symbols: | Zinc finger (C3HC4-type RING finger) family protein | chr2:16274135-16276651 FORWARD LENGTH=692	4e-45	53.69			GO:0004842 GO:0008270	ubiquitin-protein_transferase_activity zinc_ion_binding	-0.49	0.253	1.07	-0.455	-1.36	3.24	3.01	1.67	-1.4	-0.0403	0.953	1	0.902	1	0.604	0.369	0.043	0.806	0.78	1
1	1756642	TR27948|c2_g2_i2	Susceptible	2503	AH000189	1	1782823	1788333	UniRef100_A0A0J8EH23 Uncharacterized protein n=1 Tax=Beta vulgaris subsp. vulgaris RepID=A0A0J8EH23_BETVU	0	94.42	UniRef100_B9MZ75 RUBISCO SUBUNIT BINDING-protein ALPHA SUBUNIT n=1 Tax=Populus trichocarpa RepID=B9MZ75_POPTR	0	Bv9_205310_zyqz.t1 cDNAEvidence=100	0	94.42	AT2G28000.1 | Symbols: CPN60A, CH-CPN60A, SLP | chaperonin-60alpha | chr2:11926603-11929184 FORWARD LENGTH=586	0	87.28	GO:0006457 GO:0009658 GO:0009793 GO:0016226 GO:0048481	protein_folding chloroplast_organization embryo_development_ending_in_seed_dormancy iron-sulfur_cluster_assembly ovule_development			0.619	0.489	-0.0752	-0.0546	0.261	1.69	0.636	0.374	0.335	0.345	0.554	0.833	0.986	1	0.621	0.032	0.286	0.979	0.989	0.742
2	6212072	TR37820|c1_g2_i5	Resistant	994	AH000576	1	6162147	6167323	UniRef100_A0A0J8BK30 Uncharacterized protein n=1 Tax=Beta vulgaris subsp. vulgaris RepID=A0A0J8BK30_BETVU	6e-124	88.54	UniRef100_O48671 Protein RER1B n=1 Tax=Arabidopsis thaliana RepID=RER1B_ARATH	9e-104	Bv9_217230_adsa.t1 cDNAEvidence=100	2e-127	88.54	AT2G21600.1 | Symbols: ATRER1B, RER1B | endoplasmatic reticulum retrieval protein 1B | chr2:9243550-9244579 FORWARD LENGTH=195	5e-107	77.44	GO:0006890 GO:0006891	retrograde_vesicle-mediated_transport,_Golgi_to_ER intra-Golgi_vesicle-mediated_transport	GO:0003674	molecular_function	-0.633	0.0352	0.122	0.0998	-0.89	-0.777	-0.0446	-0.0216	-0.28	-0.43	0.431	1	0.958	1	0.004	0.418	0.987	1	0.981	0.462
2	6212072	TR2764|c1_g3_i3	Resistant	1187	AH000581	1	6211807	6217741	UniRef100_A0A0K9RKB0 Uncharacterized protein n=1 Tax=Spinacia oleracea RepID=A0A0K9RKB0_SPIOL	0	96.92	UniRef100_A0A0B0MJ21 Diaminopimelate decarboxylase 2, chloroplastic-like protein n=1 Tax=Gossypium arboreum RepID=A0A0B0MJ21_GOSAR	0	Bv9_217130_fijd.t1 cDNAEvidence=100	0	94.52	AT5G11880.1 | Symbols: | Pyridoxal-dependent decarboxylase family protein | chr5:3827806-3829942 REVERSE LENGTH=489	0	87.67	GO:0009089	lysine_biosynthetic_process_via_diaminopimelate	GO:0008836	diaminopimelate_decarboxylase_activity	0.105	0.285	0.679	0.861	-1.72	0.0369	-0.641	-0.0889	-0.119	0.886	0.989	1	0.824	0.887	0.043	1	0.789	1	1	0.603
2	6212072	TR1161|c1_g1_i3	Resistant	793	AH000582	1	6219844	6221942	UniRef100_A0A0J8D591 Uncharacterized protein n=1 Tax=Beta vulgaris subsp. vulgaris RepID=A0A0J8D591_BETVU	3e-65	68.99	UniRef100_UPI0005812022 PREDICTED: uncharacterized protein LOC105159891 n=1 Tax=Sesamum indicum RepID=UPI0005812022	5e-32	Bv1_011040_umth.t1 cDNAEvidence=80	1e-68	68.99	AT2G01590.1 | Symbols: CRR3 | chlororespiratory reduction 3 | chr2:266675-267379 FORWARD LENGTH=174	5e-24	41.73	GO:0009773	photosynthetic_electron_transport_in_photosystem_I	GO:0003674	molecular_function	0.16	0.0446	-0.247	-0.595	0.956	-0.047	-0.534	0.0719	-0.0418	0.457	0.938	1	0.925	0.724	0.035	0.998	0.598	1	1	0.67
2	6212072	TR58287|c5_g1_i3	Resistant	923	AH000584	1	6254491	6255627	UniRef100_UPI00053FBFBC PREDICTED: ABC transporter G family member 22-like n=1 Tax=Beta vulgaris subsp. vulgaris RepID=UPI00053FBFBC	2e-52	74.38	UniRef100_UPI00053FBFBC PREDICTED: ABC transporter G family member 22-like n=1 Tax=Beta vulgaris subsp. vulgaris RepID=UPI00053FBFBC	2e-52	Bv1_010980_ftdh.t1 cDNAEvidence=64.9	1e-50	74.14	AT5G06530.1 | Symbols: | ABC-2 type transporter family protein | chr5:1990060-1994605 REVERSE LENGTH=751	2e-30	50.43	GO:0009414 GO:0010148	response_to_water_deprivation transpiration	GO:0042626	ATPase_activity,_coupled_to_transmembrane_movement_of_substances	-18.9	-2.85	-4.43	-4.95	-6.71	-0.551	0.437	0.0594	-2.48	1.43	0.004	0.996	0.608	0.654	0.132	0.876	0.986	1	0.985	0.918
3	22642635	TR34233|c1_g3_i2	Overlap	1432	AH001215	1	22649083	22656501	UniRef100_A0A0J8EH11 Uncharacterized protein n=1 Tax=Beta vulgaris subsp. vulgaris RepID=A0A0J8EH11_BETVU	0	94.32	UniRef100_A0A061DLF7 Acetoacetyl-CoA thiolase 2 isoform 1 n=2 Tax=Theobroma cacao RepID=A0A061DLF7_THECC	0	Bv9_206140_tayh.t1 cDNAEvidence=100	0	94.32	AT5G48230.2 | Symbols: EMB1276, ACAT2 | acetoacetyl-CoA thiolase 2 | chr5:19552570-19555122 REVERSE LENGTH=403	0	82.34	GO:0006084 GO:0006085 GO:0009793 GO:0009846 GO:0009860 GO:0016125 GO:0016126 GO:0016132 GO:0019745	acetyl-CoA_metabolic_process acetyl-CoA_biosynthetic_process embryo_development_ending_in_seed_dormancy pollen_germination pollen_tube_growth sterol_metabolic_process sterol_biosynthetic_process brassinosteroid_biosynthetic_process pentacyclic_triterpenoid_biosynthetic_process	GO:0003985	acetyl-CoA_C-acetyltransferase_activity	-0.287	-0.19	0.18	0.0634	-0.34	-3.3	-0.341	-0.453	-0.359	-2.15	0.893	1	0.968	1	0.67	0	0.862	1	1	0
3	22642635	TR12145|c1_g1_i5	Overlap	1946	AH001218	1	22701209	22704764	UniRef100_A0A0J8CN69 Uncharacterized protein n=1 Tax=Beta vulgaris subsp. vulgaris RepID=A0A0J8CN69_BETVU	0	82.94	UniRef100_A0A061EJI2 NAD(P)-linked oxidoreductase superfamily protein n=1 Tax=Theobroma cacao RepID=A0A061EJI2_THECC	0	Bv3_064820_wrxj.t1 cDNAEvidence=100	0	82.94	AT1G60710.1 | Symbols: ATB2 | NAD(P)-linked oxidoreductase superfamily protein | chr1:22355073-22356627 REVERSE LENGTH=345	0	75.52	GO:0006094 GO:0006096 GO:0009611 GO:0009651 GO:0009805 GO:0009963 GO:0046686	gluconeogenesis glycolytic_process response_to_wounding response_to_salt_stress coumarin_biosynthetic_process positive_regulation_of_flavonoid_biosynthetic_process response_to_cadmium_ion			4.1	1.39	1.28	0.316	1.11	4.46	1.44	1.05	0.432	1.54	0	0.122	0.193	1	0.086	0	0.034	0.499	1	0.019
3	22642635	TR68722|c0_g1_i2	Resistant	1165	AH001213	1	22626947	22627474	UniRef100_A0A0J8BAQ9 Uncharacterized protein n=1 Tax=Beta vulgaris subsp. vulgaris RepID=A0A0J8BAQ9_BETVU	9e-73	80.57	UniRef100_UPI00051ACEDC PREDICTED: uncharacterized protein LOC104087079 n=1 Tax=Nicotiana tomentosiformis RepID=UPI00051ACEDC	3e-43	Bv4_091590_otth.t1 cDNAEvidence=100	3e-76	80.57	AT4G12340.1 | Symbols: | copper ion binding | chr4:7321492-7322004 REVERSE LENGTH=170	6e-24	50	GO:0008150	biological_process	GO:0005507	copper_ion_binding	1.97	0.582	0.177	0.337	0.871	0.0276	0.328	-0.247	-0.0384	-0.0142	0.046	0.882	0.962	1	0.097	1	0.856	1	1	1
3	22642635	TR36397|c2_g2_i1	Resistant	755	AH001214	1	22630143	22642194	UniRef100_A0A0J8BQN8 Uncharacterized protein n=1 Tax=Beta vulgaris subsp. vulgaris RepID=A0A0J8BQN8_BETVU	5e-20	88.89	UniRef100_B9IAU6 ABC1 family protein n=1 Tax=Populus trichocarpa RepID=B9IAU6_POPTR	7e-18	Bv9_206170_reor.t1 cDNAEvidence=100	2e-23	88.89	AT3G07700.3 | Symbols: | Protein kinase superfamily protein | chr3:2459696-2463241 REVERSE LENGTH=724	4e-19	74.07					-11.7	-5.65	-2.58	-0.715	-2.78	-4.12	-1.89	-0.618	-1.46	-0.155	0.025	0.368	0.769	1	0.382	0.655	0.825	1	1	0.997
3	22642635	TR110950|c5_g1_i5	Resistant	827	AH001216	1	22657917	22666837	UniRef100_A0A0J8BLL0 Uncharacterized protein n=1 Tax=Beta vulgaris subsp. vulgaris RepID=A0A0J8BLL0_BETVU	1e-91	84.52	UniRef100_UPI00052F023C PREDICTED: transmembrane emp24 domain-containing protein p24beta2-like n=1 Tax=Nelumbo nucifera RepID=UPI00052F023C	7e-83	Bv9_206130_nhjc.t1 cDNAEvidence=100	4e-95	84.52	AT3G07680.1 | Symbols: | emp24/gp25L/p24 family/GOLD family protein | chr3:2455627-2456652 FORWARD LENGTH=208	6e-78	72.73	GO:0006886 GO:0034976	intracellular_protein_transport response_to_endoplasmic_reticulum_stress	GO:0008320	protein_transmembrane_transporter_activity	2.41	0.858	0.384	-0.753	1.92	0.568	0.21	-0.168	-0.0432	0.57	0.065	0.786	0.906	0.826	0.002	0.857	0.952	1	1	0.751
3	22642635	TR34233|c1_g3_i2	Susceptible	1432	AH001215	1	22649083	22656501	UniRef100_A0A0J8EH11 Uncharacterized protein n=1 Tax=Beta vulgaris subsp. vulgaris RepID=A0A0J8EH11_BETVU	0	94.32	UniRef100_A0A061DLF7 Acetoacetyl-CoA thiolase 2 isoform 1 n=2 Tax=Theobroma cacao RepID=A0A061DLF7_THECC	0	Bv9_206140_tayh.t1 cDNAEvidence=100	0	94.32	AT5G48230.2 | Symbols: EMB1276, ACAT2 | acetoacetyl-CoA thiolase 2 | chr5:19552570-19555122 REVERSE LENGTH=403	0	82.34	GO:0006084 GO:0006085 GO:0009793 GO:0009846 GO:0009860 GO:0016125 GO:0016126 GO:0016132 GO:0019745	acetyl-CoA_metabolic_process acetyl-CoA_biosynthetic_process embryo_development_ending_in_seed_dormancy pollen_germination pollen_tube_growth sterol_metabolic_process sterol_biosynthetic_process brassinosteroid_biosynthetic_process pentacyclic_triterpenoid_biosynthetic_process	GO:0003985	acetyl-CoA_C-acetyltransferase_activity	-0.287	-0.19	0.18	0.0634	-0.34	-3.3	-0.341	-0.453	-0.359	-2.15	0.893	1	0.968	1	0.67	0	0.862	1	1	0
4	32602638	TR20197|c4_g3_i1	Resistant	1174	AH001973	1	32572189	32576376	UniRef100_A0A0J8BH06 Uncharacterized protein n=1 Tax=Beta vulgaris subsp. vulgaris RepID=A0A0J8BH06_BETVU	1e-14	80.85	UniRef100_UPI00057A5577 PREDICTED: uncharacterized protein LOC105047816 isoform X4 n=1 Tax=Elaeis guineensis var. tenera RepID=UPI00057A5577	3e-10	Bv9_219600_wjnj.t1 cDNAEvidence=100	4e-18	80.85	No informative hit E<10-6	NA	NA	NA	NA	NA	NA	2.37	0.422	0.656	0.168	1.12	0.688	1.06	-0.608	0.0848	0.147	0.032	1	0.724	1	0.029	0.775	0.14	0.968	1	0.957
4	32602638	TR20321|c3_g2_i1	Resistant	3345	AH001974	1	32578882	32583563	UniRef100_A0A0K9QQE6 Uncharacterized protein n=1 Tax=Spinacia oleracea RepID=A0A0K9QQE6_SPIOL	3e-148	46.05	UniRef100_UPI00053FE632 PREDICTED: uncharacterized protein LOC104898647 isoform X3 n=1 Tax=Beta vulgaris subsp. vulgaris RepID=UPI00053FE632	7e-148	Bv7_161590_ncwj.t2 cDNAEvidence=90.9	1e-137	54.18	AT4G27510.1 | Symbols: | unknown protein; Has 25 Blast hits to 23 proteins in 8 species: Archae - 0; Bacteria - 0; Metazoa - 0; Fungi - 0; Plants - 25; Viruses - 0; Other Eukaryotes - 0 (source: NCBI BLink). | chr4:13746284-13748996 REVERSE LENGTH=728	5e-37	26.31	GO:0008150 GO:0048451 GO:0048453	biological_process petal_formation sepal_formation	GO:0003674	molecular_function	-2.9	-0.72	-0.636	-0.482	-1.06	-1.17	-0.187	-0.48	-0.619	0.12	0.008	0.764	0.716	0.99	0.152	0.495	0.946	1	0.814	0.97
4	32602638	TR43610|c0_g1_i3	Resistant	897	AH001979	1	32611675	32612544	UniRef100_A0A0J8BKV1 Uncharacterized protein n=1 Tax=Beta vulgaris subsp. vulgaris RepID=A0A0J8BKV1_BETVU	9e-88	81.88	UniRef100_UPI00053FFC07 PREDICTED: uncharacterized protein LOC104904564 isoform X5 n=1 Tax=Beta vulgaris subsp. vulgaris RepID=UPI00053FFC07	1e-85	Bv9_219630_ipcu.t2 cDNAEvidence=100	4e-91	81.88	AT5G25360.2 | Symbols: | unknown protein; FUNCTIONS IN: molecular_function unknown; INVOLVED IN: biological_process unknown; LOCATED IN: cellular_component unknown; EXPRESSED IN: 23 plant structures; EXPRESSED DURING: 15 growth stages; BEST Arabidopsis thaliana protein match is: unknown protein (TAIR:AT4G32342.1). | chr5:8799934-8802333 REVERSE LENGTH=169	5e-50	58.11	GO:0008150	biological_process	GO:0003674	molecular_function	1.58	0.326	0.434	-0.0422	0.857	0.434	0.109	0.264	-0.184	0.245	0.072	1	0.759	1	0.04	0.824	0.969	1	1	0.869
4	32602638	TR108252|c0_g2_i1	Resistant	828	AH001984	1	32647807	32650878	UniRef100_A0A0J8BH14 Uncharacterized protein n=1 Tax=Beta vulgaris subsp. vulgaris RepID=A0A0J8BH14_BETVU	3e-81	90.8	UniRef100_E6NUB8 JHL06P13.8 protein n=1 Tax=Jatropha curcas RepID=E6NUB8_JATCU	6e-65	Bv9_219690_wzxc.t1 cDNAEvidence=100	2e-84	90.8	AT1G52590.1 | Symbols: | Putative thiol-disulphide oxidoreductase DCC | chr1:19589224-19590231 REVERSE LENGTH=172	3e-62	80.49	GO:0008150	biological_process	GO:0003674	molecular_function	1.6	0.51	0.301	0.148	0.636	-0.418	-0.124	0.118	-0.223	-0.19	0.04	0.789	0.857	1	0.126	0.814	0.957	1	1	0.903
5	34704503	TR38677|c1_g1_i1	Resistant	1505	AH002170	1	34732108	34735263	UniRef100_A0A0K9RSP4 Uncharacterized protein n=1 Tax=Spinacia oleracea RepID=A0A0K9RSP4_SPIOL	0	87.05	UniRef100_A0A061E2B3 Aldolase-type TIM barrel family protein isoform 1 n=1 Tax=Theobroma cacao RepID=A0A061E2B3_THECC	1e-176	Bv9_215380_dupr.t1 cDNAEvidence=100	0	86.63	AT5G64250.2 | Symbols: | Aldolase-type TIM barrel family protein | chr5:25697623-25698945 REVERSE LENGTH=333	1e-175	77.51	GO:0008152 GO:0009610 GO:0046482 GO:0046686	metabolic_process response_to_symbiotic_fungus para-aminobenzoic_acid_metabolic_process response_to_cadmium_ion	GO:0016491	oxidoreductase_activity	2.26	1.36	0.769	0.325	-0.196	3.86	0.899	1.39	0.923	0.648	0.098	0.159	0.701	1	0.863	0	0.43	0.199	0.67	0.69
5	34704503	TR18036|c0_g1_i3	Susceptible	1756	AH002163	1	34654100	34660585	UniRef100_A0A0J8B933 Uncharacterized protein n=1 Tax=Beta vulgaris subsp. vulgaris RepID=A0A0J8B933_BETVU	5e-150	79.38	UniRef100_UPI0004A62288 PREDICTED: uncharacterized protein LOC103500780 n=1 Tax=Cucumis melo RepID=UPI0004A62288	3e-101	Bv9_224810_ntcu.t1 cDNAEvidence=100	2e-153	79.38	AT3G16350.1 | Symbols: | Homeodomain-like superfamily protein | chr3:5547828-5549397 FORWARD LENGTH=387	2e-69	50.77	GO:0006355 GO:0009651 GO:0009723 GO:0009733 GO:0009739 GO:0009753 GO:0046686	regulation_of_transcription,_DNA-templated response_to_salt_stress response_to_ethylene response_to_auxin response_to_gibberellin response_to_jasmonic_acid response_to_cadmium_ion	GO:0003677 GO:0003700	DNA_binding sequence-specific_DNA_binding_transcription_factor_activity	1.12	0.38	0.421	0.0882	0.23	2.64	0.758	0.891	-0.0282	1.02	0.237	0.996	0.779	1	0.685	0	0.219	0.251	1	0.014
5	34704503	TR12456|c3_g2_i5	Susceptible	1452	AH002167	1	34699694	34704917	UniRef100_UPI00053FF91A PREDICTED: putative disease resistance protein RGA3 n=1 Tax=Beta vulgaris subsp. vulgaris RepID=UPI00053FF91A	2e-131	51.45	UniRef100_UPI00053FF91A PREDICTED: putative disease resistance protein RGA3 n=1 Tax=Beta vulgaris subsp. vulgaris RepID=UPI00053FF91A	2e-131	Bv4_091520_ohgj.t1 cDNAEvidence=66.7	3e-67	34.92	AT3G14470.1 | Symbols: | NB-ARC domain-containing disease resistance protein | chr3:4857940-4861104 FORWARD LENGTH=1054	4e-60	31.08	GO:0006952 GO:0009627 GO:0009697	defense_response systemic_acquired_resistance salicylic_acid_biosynthetic_process	GO:0005515	protein_binding	-0.0695	0.438	-0.188	-0.287	-0.0332	-3.06	-1.96	-0.351	0.075	-0.828	1	1	0.981	1	0.991	0.139	0.042	1	1	0.755
5	34704503	TR38677|c1_g1_i1	Susceptible	1505	AH002170	1	34732108	34735263	UniRef100_A0A0K9RSP4 Uncharacterized protein n=1 Tax=Spinacia oleracea RepID=A0A0K9RSP4_SPIOL	0	87.05	UniRef100_A0A061E2B3 Aldolase-type TIM barrel family protein isoform 1 n=1 Tax=Theobroma cacao RepID=A0A061E2B3_THECC	1e-176	Bv9_215380_dupr.t1 cDNAEvidence=100	0	86.63	AT5G64250.2 | Symbols: | Aldolase-type TIM barrel family protein | chr5:25697623-25698945 REVERSE LENGTH=333	1e-175	77.51	GO:0008152 GO:0009610 GO:0046482 GO:0046686	metabolic_process response_to_symbiotic_fungus para-aminobenzoic_acid_metabolic_process response_to_cadmium_ion	GO:0016491	oxidoreductase_activity	2.26	1.36	0.769	0.325	-0.196	3.86	0.899	1.39	0.923	0.648	0.098	0.159	0.701	1	0.863	0	0.43	0.199	0.67	0.69
6	36303395	TR38550|c2_g1_i4	Overlap	1598	AH002314	1	36296386	36298199	UniRef100_A0A0J8EEC2 Alpha-amylase n=1 Tax=Beta vulgaris subsp. vulgaris RepID=A0A0J8EEC2_BETVU	0	88.64	UniRef100_A0A0J8EEC2 Alpha-amylase n=1 Tax=Beta vulgaris subsp. vulgaris RepID=A0A0J8EEC2_BETVU	0	Bv9_213270_eewa.t1 cDNAEvidence=100	0	88.64	AT4G25000.1 | Symbols: ATAMY1, AMY1 | alpha-amylase-like | chr4:12852109-12853825 REVERSE LENGTH=423	0	65.82	GO:0009737 GO:0009739	response_to_abscisic_acid response_to_gibberellin	GO:0004556	alpha-amylase_activity	6.65	0.29	2.09	1.48	2.79	8.34	0.655	0.836	2.12	4.73	0.03	1	0.536	0.959	0.113	0.001	0.92	1	0.551	0.005
6	36303395	TR4228|c0_g1_i2	Overlap	1509	AH002316	1	36310404	36310978	UniRef100_A0A0K9R8Z1 Uncharacterized protein n=1 Tax=Spinacia oleracea RepID=A0A0K9R8Z1_SPIOL	7e-102	58.9	UniRef100_UPI0004987F49 PREDICTED: F-box protein SKIP23 n=1 Tax=Malus domestica RepID=UPI0004987F49	4e-34	Bv9_213300_nykn.t1 cDNAEvidence=100	4e-105	60.44	AT2G17030.1 | Symbols: | F-box family protein with a domain of unknown function (DUF295) | chr2:7399108-7400650 FORWARD LENGTH=407	2e-17	27.86			GO:0003674	molecular_function	7.42	1.05	3.65	1.84	0.884	6.76	1.37	0.445	2.66	2.28	0.001	1	0.056	0.619	0.616	0.002	0.632	1	0.21	0.188
6	36303395	TR38550|c2_g1_i4	Resistant	1598	AH002314	1	36296386	36298199	UniRef100_A0A0J8EEC2 Alpha-amylase n=1 Tax=Beta vulgaris subsp. vulgaris RepID=A0A0J8EEC2_BETVU	0	88.64	UniRef100_A0A0J8EEC2 Alpha-amylase n=1 Tax=Beta vulgaris subsp. vulgaris RepID=A0A0J8EEC2_BETVU	0	Bv9_213270_eewa.t1 cDNAEvidence=100	0	88.64	AT4G25000.1 | Symbols: ATAMY1, AMY1 | alpha-amylase-like | chr4:12852109-12853825 REVERSE LENGTH=423	0	65.82	GO:0009737 GO:0009739	response_to_abscisic_acid response_to_gibberellin	GO:0004556	alpha-amylase_activity	6.65	0.29	2.09	1.48	2.79	8.34	0.655	0.836	2.12	4.73	0.03	1	0.536	0.959	0.113	0.001	0.92	1	0.551	0.005
6	36303395	TR4228|c0_g1_i2	Susceptible	1509	AH002316	1	36310404	36310978	UniRef100_A0A0K9R8Z1 Uncharacterized protein n=1 Tax=Spinacia oleracea RepID=A0A0K9R8Z1_SPIOL	7e-102	58.9	UniRef100_UPI0004987F49 PREDICTED: F-box protein SKIP23 n=1 Tax=Malus domestica RepID=UPI0004987F49	4e-34	Bv9_213300_nykn.t1 cDNAEvidence=100	4e-105	60.44	AT2G17030.1 | Symbols: | F-box family protein with a domain of unknown function (DUF295) | chr2:7399108-7400650 FORWARD LENGTH=407	2e-17	27.86			GO:0003674	molecular_function	7.42	1.05	3.65	1.84	0.884	6.76	1.37	0.445	2.66	2.28	0.001	1	0.056	0.619	0.616	0.002	0.632	1	0.21	0.188
7	27824362	TR6733|c0_g3_i1	Resistant	2810	AH003905	2	27776502	27793828	UniRef100_A0A0J8C7U2 Uncharacterized protein n=1 Tax=Beta vulgaris subsp. vulgaris RepID=A0A0J8C7U2_BETVU	0	77.02	UniRef100_UPI0002C35716 PREDICTED: F-box-like/WD repeat-containing protein TBL1XR1 n=1 Tax=Fragaria vesca subsp. vesca RepID=UPI0002C35716	0	Bv6_127550_qgef.t1 cDNAEvidence=100	0	77.02	AT5G67320.1 | Symbols: HOS15 | WD-40 repeat family protein | chr5:26857268-26860974 FORWARD LENGTH=613	0	77.66	GO:0000956 GO:0006342 GO:0009409 GO:0009640 GO:0010388 GO:0016567 GO:0016571 GO:0016572 GO:0016575 GO:0016579 GO:0045893 GO:0051567	nuclear-transcribed_mRNA_catabolic_process chromatin_silencing response_to_cold photomorphogenesis cullin_deneddylation protein_ubiquitination histone_methylation histone_phosphorylation histone_deacetylation protein_deubiquitination positive_regulation_of_transcription,_DNA-templated histone_H3-K9_methylation			0.978	0.289	0.0356	-0.56	1.21	0.142	-0.27	0.204	0.148	0.0601	0.418	1	1	0.856	0.009	0.97	0.894	1	1	0.988
7	27824362	TR101747|c0_g1_i1	Resistant	473	AH003907	2	27809340	27809831	UniRef100_A0A0J8CI94 Uncharacterized protein n=1 Tax=Beta vulgaris subsp. vulgaris RepID=A0A0J8CI94_BETVU	2e-44	64.33	UniRef100_UPI0003D77ACF PREDICTED: uncharacterized protein LOC102626987 n=1 Tax=Citrus sinensis RepID=UPI0003D77ACF	8e-24	Bv5_105240_scsk.t1 cDNAEvidence=100	7e-48	64.33	AT5G47110.1 | Symbols: LIL3:2 | Chlorophyll A-B binding family protein | chr5:19134218-19135238 REVERSE LENGTH=258	1e-16	74.42	GO:0000038 GO:0009765 GO:0042335	very_long-chain_fatty_acid_metabolic_process photosynthesis,_light_harvesting cuticle_development	GO:0003674	molecular_function	-1.64	0.0436	-0.242	-0.223	-1.22	0.366	0.362	0.0194	0.112	-0.128	0.193	1	0.951	1	0.033	0.907	0.866	1	1	0.968
7	27824362	TR30826|c4_g1_i2	Resistant	2101	AH003909	2	27833268	27844005	UniRef100_A0A0K9QYB8 Uncharacterized protein n=1 Tax=Spinacia oleracea RepID=A0A0K9QYB8_SPIOL	0	87.5	UniRef100_UPI00052E9ED7 PREDICTED: probable cadmium/zinc-transporting ATPase HMA1, chloroplastic isoform X2 n=1 Tax=Nelumbo nucifera RepID=UPI00052E9ED7	0	Bv6_127490_qead.t2 cDNAEvidence=93.1	0	84.2	AT4G37270.1 | Symbols: HMA1, ATHMA1 | heavy metal atpase 1 | chr4:17541987-17546352 REVERSE LENGTH=819	0	70.85	GO:0006816 GO:0006878 GO:0009636 GO:0009642 GO:0055069	calcium_ion_transport cellular_copper_ion_homeostasis response_to_toxic_substance response_to_light_intensity zinc_ion_homeostasis	GO:0004008 GO:0005388 GO:0015434 GO:0015633 GO:0016887	copper-exporting_ATPase_activity calcium-transporting_ATPase_activity cadmium-transporting_ATPase_activity zinc_transporting_ATPase_activity ATPase_activity	1.48	0.274	0.5	0.469	0.242	0.454	0.264	0.303	-0.0428	-0.0713	0.035	1	0.574	0.709	0.627	0.756	0.826	1	1	0.973
7	27824362	TR10962|c0_g1_i1	Resistant	2006	AH003910	2	27851350	27852357	UniRef100_A0A0J8C850 Uncharacterized protein n=1 Tax=Beta vulgaris subsp. vulgaris RepID=A0A0J8C850_BETVU	1e-131	74.62	UniRef100_Q1XAN1 Sucrose responsive element binding protein n=1 Tax=Vitis vinifera RepID=Q1XAN1_VITVI	1e-95	Bv6_127480_such.t1 cDNAEvidence=100	5e-135	74.62	AT4G37260.1 | Symbols: MYB73, ATMYB73 | myb domain protein 73 | chr4:17540602-17541564 FORWARD LENGTH=320	5e-77	51.05	GO:0006355 GO:0009723 GO:0009737 GO:0009751 GO:0009753 GO:0010200 GO:0046686	regulation_of_transcription,_DNA-templated response_to_ethylene response_to_abscisic_acid response_to_salicylic_acid response_to_jasmonic_acid response_to_chitin response_to_cadmium_ion	GO:0003677 GO:0003700	DNA_binding sequence-specific_DNA_binding_transcription_factor_activity	-0.486	0.529	0.428	-1.14	-0.308	-1.34	-1.27	0.252	-0.162	-0.16	0.745	0.904	0.818	0.108	0.641	0.313	0.006	1	1	0.944
7	27824362	TR10962|c0_g1_i1	Susceptible	2006	AH003910	2	27851350	27852357	UniRef100_A0A0J8C850 Uncharacterized protein n=1 Tax=Beta vulgaris subsp. vulgaris RepID=A0A0J8C850_BETVU	1e-131	74.62	UniRef100_Q1XAN1 Sucrose responsive element binding protein n=1 Tax=Vitis vinifera RepID=Q1XAN1_VITVI	1e-95	Bv6_127480_such.t1 cDNAEvidence=100	5e-135	74.62	AT4G37260.1 | Symbols: MYB73, ATMYB73 | myb domain protein 73 | chr4:17540602-17541564 FORWARD LENGTH=320	5e-77	51.05	GO:0006355 GO:0009723 GO:0009737 GO:0009751 GO:0009753 GO:0010200 GO:0046686	regulation_of_transcription,_DNA-templated response_to_ethylene response_to_abscisic_acid response_to_salicylic_acid response_to_jasmonic_acid response_to_chitin response_to_cadmium_ion	GO:0003677 GO:0003700	DNA_binding sequence-specific_DNA_binding_transcription_factor_activity	-0.486	0.529	0.428	-1.14	-0.308	-1.34	-1.27	0.252	-0.162	-0.16	0.745	0.904	0.818	0.108	0.641	0.313	0.006	1	1	0.944
8	28325835	TR27259|c3_g1_i2	Overlap	1772	AH003950	2	28330728	28332919	UniRef100_A0A0J8C449 Glycosyltransferase n=2 Tax=Beta vulgaris subsp. vulgaris RepID=A0A0J8C449_BETVU	0	65.97	UniRef100_A0A0J8C449 Glycosyltransferase n=2 Tax=Beta vulgaris subsp. vulgaris RepID=A0A0J8C449_BETVU	0	Bv6_138350_oxgp.t1 cDNAEvidence=100	0	65.97	AT3G21760.1 | Symbols: HYR1 | UDP-Glycosyltransferase superfamily protein | chr3:7667099-7668556 FORWARD LENGTH=485	2e-123	44.01			GO:0008194 GO:0016757	UDP-glycosyltransferase_activity transferase_activity,_transferring_glycosyl_groups	4.74	1.27	1.58	0.0951	1.79	10.8	3	2.53	2.29	2.99	0.014	0.786	0.469	1	0.086	0	0.004	0.106	0.231	0.012
8	28325835	TR35838|c1_g1_i5	Overlap	1990	AH003951	2	28336040	28337401	UniRef100_A0A0J8C8J6 Glycosyltransferase n=1 Tax=Beta vulgaris subsp. vulgaris RepID=A0A0J8C8J6_BETVU	0	57.29	UniRef100_A0A0J8C8J6 Glycosyltransferase n=1 Tax=Beta vulgaris subsp. vulgaris RepID=A0A0J8C8J6_BETVU	0	Bv6_138390_aijq.t1 cDNAEvidence=100	0	57.29	AT3G21800.1 | Symbols: UGT71B8 | UDP-glucosyl transferase 71B8 | chr3:7680243-7681685 REVERSE LENGTH=480	3e-126	42.83			GO:0008194 GO:0016757 GO:0080043 GO:0080046	UDP-glycosyltransferase_activity transferase_activity,_transferring_glycosyl_groups quercetin_3-O-glucosyltransferase_activity quercetin_4'-O-glucosyltransferase_activity	4.2	1.46	1.13	0.582	1.03	4.08	1.82	1.37	0.277	0.617	0	0.059	0.489	1	0.113	0	0.006	0.202	1	0.707
8	28325835	TR21598|c0_g1_i2	Resistant	774	AH003946	2	28295640	28300212	UniRef100_A0A0J8C7R4 Uncharacterized protein n=1 Tax=Beta vulgaris subsp. vulgaris RepID=A0A0J8C7R4_BETVU	8e-61	74.42	UniRef100_UPI0004A63322 PREDICTED: tRNA-dihydrouridine(16/17) synthase [NAD(P)(+)]-like n=1 Tax=Cucumis melo RepID=UPI0004A63322	3e-43	Bv6_127310_ukmr.t2 cDNAEvidence=77.8	3e-64	74.42	AT5G67220.1 | Symbols: | FMN-linked oxidoreductases superfamily protein | chr5:26820276-26821926 REVERSE LENGTH=423	2e-40	58.02	GO:0006808	regulation_of_nitrogen_utilization			-1.74	0.207	-0.475	-0.222	-1.25	-0.166	-0.0471	0.0947	0.231	-0.445	0.12	1	0.779	1	0.048	0.963	0.992	1	1	0.774
8	28325835	TR27259|c3_g1_i2	Susceptible	1772	AH003950	2	28330728	28332919	UniRef100_A0A0J8C449 Glycosyltransferase n=2 Tax=Beta vulgaris subsp. vulgaris RepID=A0A0J8C449_BETVU	0	65.97	UniRef100_A0A0J8C449 Glycosyltransferase n=2 Tax=Beta vulgaris subsp. vulgaris RepID=A0A0J8C449_BETVU	0	Bv6_138350_oxgp.t1 cDNAEvidence=100	0	65.97	AT3G21760.1 | Symbols: HYR1 | UDP-Glycosyltransferase superfamily protein | chr3:7667099-7668556 FORWARD LENGTH=485	2e-123	44.01			GO:0008194 GO:0016757	UDP-glycosyltransferase_activity transferase_activity,_transferring_glycosyl_groups	4.74	1.27	1.58	0.0951	1.79	10.8	3	2.53	2.29	2.99	0.014	0.786	0.469	1	0.086	0	0.004	0.106	0.231	0.012
8	28325835	TR35838|c1_g1_i5	Susceptible	1990	AH003951	2	28336040	28337401	UniRef100_A0A0J8C8J6 Glycosyltransferase n=1 Tax=Beta vulgaris subsp. vulgaris RepID=A0A0J8C8J6_BETVU	0	57.29	UniRef100_A0A0J8C8J6 Glycosyltransferase n=1 Tax=Beta vulgaris subsp. vulgaris RepID=A0A0J8C8J6_BETVU	0	Bv6_138390_aijq.t1 cDNAEvidence=100	0	57.29	AT3G21800.1 | Symbols: UGT71B8 | UDP-glucosyl transferase 71B8 | chr3:7680243-7681685 REVERSE LENGTH=480	3e-126	42.83			GO:0008194 GO:0016757 GO:0080043 GO:0080046	UDP-glycosyltransferase_activity transferase_activity,_transferring_glycosyl_groups quercetin_3-O-glucosyltransferase_activity quercetin_4'-O-glucosyltransferase_activity	4.2	1.46	1.13	0.582	1.03	4.08	1.82	1.37	0.277	0.617	0	0.059	0.489	1	0.113	0	0.006	0.202	1	0.707
9	29795278	TR33351|c2_g1_i4	Resistant	1700	AH004094	2	29778622	29786448	UniRef100_A0A0J8EYS3 Uncharacterized protein n=1 Tax=Beta vulgaris subsp. vulgaris RepID=A0A0J8EYS3_BETVU	4e-80	73.98	UniRef100_UPI00053F9C66 PREDICTED: uncharacterized protein LOC104896309 isoform X2 n=1 Tax=Beta vulgaris subsp. vulgaris RepID=UPI00053F9C66	8e-80	Bv6_140600_asmn.t1 cDNAEvidence=100	2e-83	73.98	AT1G26180.1 | Symbols: | unknown protein; CONTAINS InterPro DOMAIN/s: Protein of unknown function DUF2232, membrane (InterPro:IPR018710); Has 285 Blast hits to 285 proteins in 90 species: Archae - 0; Bacteria - 140; Metazoa - 0; Fungi - 0; Plants - 40; Viruses - 0; Other Eukaryotes - 105 (source: NCBI BLink). | chr1:9054824-9056526 FORWARD LENGTH=289	6e-52	58.5					1.21	-0.032	0.592	-0.433	1.08	0.25	0.035	0.267	-0.0177	-0.0341	0.261	1	0.644	0.961	0.018	0.93	0.996	1	1	0.995
9	29795278	TR27929|c1_g1_i1	Resistant	1455	AH004096	2	29809142	29814081	UniRef100_UPI00053F6115 PREDICTED: protein NSP-INTERACTING KINASE 1-like n=1 Tax=Beta vulgaris subsp. vulgaris RepID=UPI00053F6115	0	88.6	UniRef100_UPI00053F6115 PREDICTED: protein NSP-INTERACTING KINASE 1-like n=1 Tax=Beta vulgaris subsp. vulgaris RepID=UPI00053F6115	0	Bv6_148520_tzmc.t1 cDNAEvidence=100	3e-141	65.13	AT5G16000.1 | Symbols: NIK1 | NSP-interacting kinase 1 | chr5:5224264-5227003 FORWARD LENGTH=638	5e-174	76.97	GO:0000271 GO:0009736 GO:0009825 GO:0009932 GO:0010075 GO:0010817 GO:0043481 GO:0048767 GO:0051607 GO:0071555	polysaccharide_biosynthetic_process cytokinin-activated_signaling_pathway multidimensional_cell_growth cell_tip_growth regulation_of_meristem_growth regulation_of_hormone_levels anthocyanin_accumulation_in_tissues_in_response_to_UV_light root_hair_elongation defense_response_to_virus cell_wall_organization	GO:0005515 GO:0016301	protein_binding kinase_activity	-1.76	0.327	-0.066	-0.22	-1.8	0.599	-0.339	1.51	0.0783	-0.648	0.404	1	0.999	1	0.043	0.889	0.935	0.416	1	0.781
9	29795278	TR84917|c1_g1_i1	Susceptible	1528	AH004089	2	29733239	29742890	UniRef100_A0A0K9S305 Uncharacterized protein (Fragment) n=1 Tax=Spinacia oleracea RepID=A0A0K9S305_SPIOL	7e-168	69.17	UniRef100_UPI00054014A7 PREDICTED: phosphate transporter PHO1 homolog 1 isoform X2 n=1 Tax=Beta vulgaris subsp. vulgaris RepID=UPI00054014A7	4e-158	Bv6_140970_nxmq.t1 cDNAEvidence=100	2e-161	66.58	AT1G68740.1 | Symbols: PHO1;H1 | EXS (ERD1/XPR1/SYG1) family protein | chr1:25812735-25816574 REVERSE LENGTH=784	6e-104	47.63	GO:0006817 GO:0016036 GO:0019375 GO:0045892	phosphate_ion_transport cellular_response_to_phosphate_starvation galactolipid_biosynthetic_process negative_regulation_of_transcription,_DNA-templated			-2.62	-0.283	-0.436	-1.03	-0.872	-2.56	0.0126	0.942	-1.26	-2.25	0.121	1	0.932	0.68	0.332	0.196	1	0.888	0.461	0.001
9	29795278	TR27929|c1_g1_i1	Susceptible	1455	AH004096	2	29809142	29814081	UniRef100_UPI00053F6115 PREDICTED: protein NSP-INTERACTING KINASE 1-like n=1 Tax=Beta vulgaris subsp. vulgaris RepID=UPI00053F6115	0	88.6	UniRef100_UPI00053F6115 PREDICTED: protein NSP-INTERACTING KINASE 1-like n=1 Tax=Beta vulgaris subsp. vulgaris RepID=UPI00053F6115	0	Bv6_148520_tzmc.t1 cDNAEvidence=100	3e-141	65.13	AT5G16000.1 | Symbols: NIK1 | NSP-interacting kinase 1 | chr5:5224264-5227003 FORWARD LENGTH=638	5e-174	76.97	GO:0000271 GO:0009736 GO:0009825 GO:0009932 GO:0010075 GO:0010817 GO:0043481 GO:0048767 GO:0051607 GO:0071555	polysaccharide_biosynthetic_process cytokinin-activated_signaling_pathway multidimensional_cell_growth cell_tip_growth regulation_of_meristem_growth regulation_of_hormone_levels anthocyanin_accumulation_in_tissues_in_response_to_UV_light root_hair_elongation defense_response_to_virus cell_wall_organization	GO:0005515 GO:0016301	protein_binding kinase_activity	-1.76	0.327	-0.066	-0.22	-1.8	0.599	-0.339	1.51	0.0783	-0.648	0.404	1	0.999	1	0.043	0.889	0.935	0.416	1	0.781
9	29795278	TR36394|c2_g7_i2	Susceptible	1760	AH004101	2	29846245	29847812	UniRef100_A0A0K9QGW4 Uncharacterized protein n=1 Tax=Spinacia oleracea RepID=A0A0K9QGW4_SPIOL	0	70.63	UniRef100_A0A0J8C475 Glycosyltransferase n=1 Tax=Beta vulgaris subsp. vulgaris RepID=A0A0J8C475_BETVU	0	Bv6_140440_rwdj.t1 cDNAEvidence=100	0	70.73	AT4G34131.1 | Symbols: UGT73B3 | UDP-glucosyl transferase 73B3 | chr4:16343268-16344713 REVERSE LENGTH=481	9e-140	50.47	GO:0051707	response_to_other_organism	GO:0008194 GO:0016758 GO:0035251 GO:0080043	UDP-glycosyltransferase_activity transferase_activity,_transferring_hexosyl_groups UDP-glucosyltransferase_activity quercetin_3-O-glucosyltransferase_activity	0.761	-0.0652	0.54	0.247	0.0391	3.35	1.22	1.14	1.02	-0.0282	0.621	1	0.769	1	0.976	0	0.054	0.254	0.405	0.998
10	31157102	TR730|c1_g3_i5	Resistant	2118	AH004226	2	31121878	31132049	UniRef100_A0A0J8C297 Uncharacterized protein n=1 Tax=Beta vulgaris subsp. vulgaris RepID=A0A0J8C297_BETVU	0	78.92	UniRef100_UPI000520B159 PREDICTED: ATP-dependent Clp protease ATP-binding subunit clpX-like, mitochondrial n=1 Tax=Nicotiana sylvestris RepID=UPI000520B159	0	Bv6_145820_eqaf.t1 cDNAEvidence=100	0	78.92	AT1G33360.1 | Symbols: | ATP-dependent Clp protease | chr1:12092111-12095789 FORWARD LENGTH=656	5e-174	54.57			GO:0016887	ATPase_activity	-0.577	0.00849	-0.012	0.311	-0.885	-0.145	-0.195	0.238	0.00928	-0.197	0.55	1	1	0.973	0.029	0.949	0.886	1	1	0.884
10	31157102	TR35821|c5_g1_i2	Resistant	333	AH004228	2	31150888	31157358	UniRef100_UPI0005401DF9 PREDICTED: 2-C-methyl-D-erythritol 4-phosphate cytidylyltransferase, chloroplastic n=1 Tax=Beta vulgaris subsp. vulgaris RepID=UPI0005401DF9	3e-25	63.73	UniRef100_UPI0005401DF9 PREDICTED: 2-C-methyl-D-erythritol 4-phosphate cytidylyltransferase, chloroplastic n=1 Tax=Beta vulgaris subsp. vulgaris RepID=UPI0005401DF9	3e-25	Bv6_145600_zonw.t1 cDNAEvidence=100	9e-11	72.22	AT2G02500.1 | Symbols: ISPD, ATMEPCT, MCT | Nucleotide-diphospho-sugar transferases superfamily protein | chr2:671054-673124 REVERSE LENGTH=302	3e-11	69.09	GO:0000096 GO:0006546 GO:0006636 GO:0006733 GO:0006766 GO:0008652 GO:0009072 GO:0009106 GO:0009108 GO:0009117 GO:0009416 GO:0009695 GO:0015994 GO:0015995 GO:0016117 GO:0019216 GO:0019288 GO:0019748 GO:0031408 GO:0044272	sulfur_amino_acid_metabolic_process glycine_catabolic_process unsaturated_fatty_acid_biosynthetic_process oxidoreduction_coenzyme_metabolic_process vitamin_metabolic_process cellular_amino_acid_biosynthetic_process aromatic_amino_acid_family_metabolic_process lipoate_metabolic_process coenzyme_biosynthetic_process nucleotide_metabolic_process response_to_light_stimulus jasmonic_acid_biosynthetic_…	GO:0050518	2-C-methyl-D-erythritol_4-phosphate_cytidylyltransferase_activity	-11.1	-8.25	-0.509	-0.327	-1.98	2.38	0.658	1.76	0.185	-0.225	0.049	0.127	0.986	1	0.577	0.851	0.967	1	1	0.994
10	31157102	TR1331|c3_g2_i2	Resistant	1476	AH004230	2	31167027	31177877	UniRef100_A0A0K9S402 Uncharacterized protein n=1 Tax=Spinacia oleracea RepID=A0A0K9S402_SPIOL	0	90.72	UniRef100_UPI0003D74988 PREDICTED: methionine S-methyltransferase-like isoform X2 n=1 Tax=Citrus sinensis RepID=UPI0003D74988	0	Bv6_145640_esdg.t1 cDNAEvidence=100	0	89.16	AT5G49810.1 | Symbols: MMT | methionine S-methyltransferase | chr5:20239418-20246046 FORWARD LENGTH=1071	0	76.73	GO:0001887 GO:0046500	selenium_compound_metabolic_process S-adenosylmethionine_metabolic_process	GO:0008757	S-adenosylmethionine-dependent_methyltransferase_activity	-2.87	-0.818	-0.958	0.241	-1.34	-1.75	-0.196	-0.0299	-0.112	-1.41	0.033	0.809	0.534	1	0.105	0.328	0.955	1	1	0.061
10	31157102	TR10626|c0_g3_i4	Resistant	655	AH004231	2	31178692	31179264	UniRef100_A0A0J8C6M4 Uncharacterized protein n=1 Tax=Beta vulgaris subsp. vulgaris RepID=A0A0J8C6M4_BETVU	8e-84	78.61	UniRef100_A0A061G8N6 HSP20-like chaperones superfamily protein n=1 Tax=Theobroma cacao RepID=A0A061G8N6_THECC	7e-64	Bv6_145660_xctm.t1 cDNAEvidence=100	3e-87	78.61	AT4G10250.1 | Symbols: ATHSP22.0 | HSP20-like chaperones superfamily protein | chr4:6370537-6371124 FORWARD LENGTH=195	1e-42	53.79	GO:0006457 GO:0009408 GO:0009644 GO:0042542	protein_folding response_to_heat response_to_high_light_intensity response_to_hydrogen_peroxide	GO:0003674	molecular_function	3.62	0.687	0.551	-1.34	3.72	1.35	1.52	-0.694	-0.903	1.43	0.254	1	0.953	0.981	0.005	0.807	0.392	1	1	0.494
10	31157102	TR1331|c3_g2_i2	Susceptible	1476	AH004230	2	31167027	31177877	UniRef100_A0A0K9S402 Uncharacterized protein n=1 Tax=Spinacia oleracea RepID=A0A0K9S402_SPIOL	0	90.72	UniRef100_UPI0003D74988 PREDICTED: methionine S-methyltransferase-like isoform X2 n=1 Tax=Citrus sinensis RepID=UPI0003D74988	0	Bv6_145640_esdg.t1 cDNAEvidence=100	0	89.16	AT5G49810.1 | Symbols: MMT | methionine S-methyltransferase | chr5:20239418-20246046 FORWARD LENGTH=1071	0	76.73	GO:0001887 GO:0046500	selenium_compound_metabolic_process S-adenosylmethionine_metabolic_process	GO:0008757	S-adenosylmethionine-dependent_methyltransferase_activity	-2.87	-0.818	-0.958	0.241	-1.34	-1.75	-0.196	-0.0299	-0.112	-1.41	0.033	0.809	0.534	1	0.105	0.328	0.955	1	1	0.061
11	32514868	TR3729|c0_g2_i1	Overlap	757	AH004375	2	32493707	32494432	UniRef100_UPI0005401D80 PREDICTED: E3 ubiquitin-protein ligase RNF181 n=1 Tax=Beta vulgaris subsp. vulgaris RepID=UPI0005401D80	1e-61	61.54	UniRef100_UPI0005401D80 PREDICTED: E3 ubiquitin-protein ligase RNF181 n=1 Tax=Beta vulgaris subsp. vulgaris RepID=UPI0005401D80	1e-61	Bv8_188770_fhez.t1 cDNAEvidence=100	1e-23	46.32	AT1G26800.1 | Symbols: | RING/U-box superfamily protein | chr1:9285576-9286190 REVERSE LENGTH=204	4e-45	45.6			GO:0008270	zinc_ion_binding	4.17	0.133	1.68	-0.0613	2.42	1.89	-1.18	0.785	0.553	1.73	0.026	1	0.228	1	0.005	0.592	0.608	1	1	0.126
11	32514868	TR3729|c0_g2_i1	Resistant	757	AH004375	2	32493707	32494432	UniRef100_UPI0005401D80 PREDICTED: E3 ubiquitin-protein ligase RNF181 n=1 Tax=Beta vulgaris subsp. vulgaris RepID=UPI0005401D80	1e-61	61.54	UniRef100_UPI0005401D80 PREDICTED: E3 ubiquitin-protein ligase RNF181 n=1 Tax=Beta vulgaris subsp. vulgaris RepID=UPI0005401D80	1e-61	Bv8_188770_fhez.t1 cDNAEvidence=100	1e-23	46.32	AT1G26800.1 | Symbols: | RING/U-box superfamily protein | chr1:9285576-9286190 REVERSE LENGTH=204	4e-45	45.6			GO:0008270	zinc_ion_binding	4.17	0.133	1.68	-0.0613	2.42	1.89	-1.18	0.785	0.553	1.73	0.026	1	0.228	1	0.005	0.592	0.608	1	1	0.126
11	32514868	TR7711|c3_g1_i1	Resistant	981	AH004384	2	32566803	32567886	UniRef100_A0A0K9RTK1 Uncharacterized protein n=1 Tax=Spinacia oleracea RepID=A0A0K9RTK1_SPIOL	8e-37	61.44	UniRef100_UPI00053BBB4F PREDICTED: zinc-finger homeodomain protein 8-like n=1 Tax=Camelina sativa RepID=UPI00053BBB4F	5e-27	Bv6_153930_sesx.t1 cDNAEvidence=100	4e-36	92.31	AT5G15210.1 | Symbols: ATHB30, ZFHD3, HB30, ZHD8 | homeobox protein 30 | chr5:4937874-4938689 REVERSE LENGTH=271	7e-29	46.79			GO:0003677 GO:0003700 GO:0005515	DNA_binding sequence-specific_DNA_binding_transcription_factor_activity protein_binding	-1.96	-0.0929	-0.522	-0.419	-0.925	-0.782	-0.0988	-0.0408	-0.384	-0.258	0.05	1	0.749	0.954	0.112	0.652	0.976	1	0.981	0.892
11	32514868	TR3729|c0_g2_i1	Susceptible	757	AH004375	2	32493707	32494432	UniRef100_UPI0005401D80 PREDICTED: E3 ubiquitin-protein ligase RNF181 n=1 Tax=Beta vulgaris subsp. vulgaris RepID=UPI0005401D80	1e-61	61.54	UniRef100_UPI0005401D80 PREDICTED: E3 ubiquitin-protein ligase RNF181 n=1 Tax=Beta vulgaris subsp. vulgaris RepID=UPI0005401D80	1e-61	Bv8_188770_fhez.t1 cDNAEvidence=100	1e-23	46.32	AT1G26800.1 | Symbols: | RING/U-box superfamily protein | chr1:9285576-9286190 REVERSE LENGTH=204	4e-45	45.6			GO:0008270	zinc_ion_binding	4.17	0.133	1.68	-0.0613	2.42	1.89	-1.18	0.785	0.553	1.73	0.026	1	0.228	1	0.005	0.592	0.608	1	1	0.126
11	32514868	TR30655|c0_g2_i3	Susceptible	1000	AH004380	2	32526415	32526879	UniRef100_A0A0K9RTT6 Uncharacterized protein n=1 Tax=Spinacia oleracea RepID=A0A0K9RTT6_SPIOL	5e-139	81.82	UniRef100_UPI00053F690B PREDICTED: ribonuclease 1-like n=1 Tax=Beta vulgaris subsp. vulgaris RepID=UPI00053F690B	8e-92	Bv6_153830_pdmn.t1 cDNAEvidence=100	4e-130	78.79	AT2G02990.1 | Symbols: RNS1, ATRNS1 | ribonuclease 1 | chr2:873714-874667 FORWARD LENGTH=230	2e-72	50.73	GO:0006865 GO:0007568 GO:0009611 GO:0009718 GO:0015824 GO:0016036	amino_acid_transport aging response_to_wounding anthocyanin-containing_compound_biosynthetic_process proline_transport cellular_response_to_phosphate_starvation	GO:0004521 GO:0004540	endoribonuclease_activity ribonuclease_activity	-0.0843	-0.465	0.173	-0.158	0.366	-3.15	-0.7	-0.33	-0.925	-1.19	0.99	1	0.975	1	0.74	0.011	0.66	1	0.629	0.259
12	837890	TR43587|c1_g1_i2	Resistant	675	AH004767	3	798000	806019	UniRef100_UPI00053FD7B5 PREDICTED: aldehyde dehydrogenase family 2 member B7, mitochondrial-like isoform X2 n=1 Tax=Beta vulgaris subsp. vulgaris RepID=UPI00053FD7B5	3e-88	91.61	UniRef100_UPI00053FD7B5 PREDICTED: aldehyde dehydrogenase family 2 member B7, mitochondrial-like isoform X2 n=1 Tax=Beta vulgaris subsp. vulgaris RepID=UPI00053FD7B5	3e-88	Bv6_149040_dgrz.t1 cDNAEvidence=100	1e-90	91.61	AT1G23800.1 | Symbols: ALDH2B7, ALDH2B | aldehyde dehydrogenase 2B7 | chr1:8412238-8414804 REVERSE LENGTH=534	3e-74	77.62	GO:0010228 GO:0016926 GO:0050665	vegetative_to_reproductive_phase_transition_of_meristem protein_desumoylation hydrogen_peroxide_biosynthetic_process	GO:0004028 GO:0004029	3-chloroallyl_aldehyde_dehydrogenase_activity aldehyde_dehydrogenase_(NAD)_activity	-1.46	0.245	0.0677	0.443	-2.21	0.5	0.012	0.683	0.0505	-0.245	0.587	1	1	1	0.041	0.939	1	1	1	0.968
12	837890	TR31695|c1_g1_i4	Resistant	1107	AH004772	3	841367	849154	UniRef100_A0A0K9S1E2 Uncharacterized protein n=1 Tax=Spinacia oleracea RepID=A0A0K9S1E2_SPIOL	2e-76	58.17	UniRef100_UPI00052E8D7E PREDICTED: RNA-binding protein 25 isoform X3 n=1 Tax=Nelumbo nucifera RepID=UPI00052E8D7E	2e-47	Bv6_148970_ifpq.t2 cDNAEvidence=100	2e-69	56.69	AT1G60200.1 | Symbols: | splicing factor PWI domain-containing protein / RNA recognition motif (RRM)-containing protein | chr1:22200882-22205241 REVERSE LENGTH=899	6e-35	64.29			GO:0003676	nucleic_acid_binding	-3.05	-0.571	-0.824	-0.135	-1.52	-1.36	-0.123	-0.000562	-0.536	-0.701	0.013	0.942	0.522	1	0.092	0.399	0.97	1	0.942	0.554
12	837890	TR10581|c3_g1_i6	Resistant	1165	AH004776	3	882052	884948	UniRef100_A0A0J8EVM1 Uncharacterized protein n=1 Tax=Beta vulgaris subsp. vulgaris RepID=A0A0J8EVM1_BETVU	1e-27	73.39	UniRef100_UPI000581367D PREDICTED: uncharacterized protein LOC105177141 n=1 Tax=Sesamum indicum RepID=UPI000581367D	4e-12	Bv6_148890_jpjd.t1 cDNAEvidence=100	4e-31	73.39	AT1G70350.1 | Symbols: | unknown protein; Has 98 Blast hits to 98 proteins in 11 species: Archae - 0; Bacteria - 0; Metazoa - 0; Fungi - 0; Plants - 98; Viruses - 0; Other Eukaryotes - 0 (source: NCBI BLink). | chr1:26507341-26508262 REVERSE LENGTH=105	1e-07	49.02	GO:0008150	biological_process	GO:0003674	molecular_function	1.84	0.131	0.0683	0.505	1.14	0.62	-0.264	0.555	0.0197	0.31	0.122	1	0.994	0.971	0.045	0.804	0.922	0.97	1	0.881
12	837890	TR30365|c3_g2_i1	Susceptible	2665	AH004769	3	830141	832195	UniRef100_A0A0K9QFP7 Uncharacterized protein n=1 Tax=Spinacia oleracea RepID=A0A0K9QFP7_SPIOL	0	71.01	UniRef100_UPI00053FB5DD PREDICTED: U-box domain-containing protein 19 n=1 Tax=Beta vulgaris subsp. vulgaris RepID=UPI00053FB5DD	0	Bv6_149020_tdds.t1 cDNAEvidence=80	0	64.24	AT1G60190.1 | Symbols: | ARM repeat superfamily protein | chr1:22198403-22200463 FORWARD LENGTH=686	7e-138	40.54	GO:0010029	regulation_of_seed_germination			-0.491	0.403	-0.717	-0.229	0.053	-2.29	0.0871	-0.909	-1.09	-0.378	0.772	1	0.605	1	0.962	0.031	0.983	0.5	0.24	0.816
13	1071432	TR5152|c0_g1_i5	Resistant	1089	AH004790	3	1032393	1036770	UniRef100_A0A0J8C189 Uncharacterized protein n=1 Tax=Beta vulgaris subsp. vulgaris RepID=A0A0J8C189_BETVU	9e-115	73.41	UniRef100_UPI0005FAD290 PREDICTED: probable polygalacturonase At1g80170 n=1 Tax=Jatropha curcas RepID=UPI0005FAD290	9e-90	Bv6_148660_hwqn.t1 cDNAEvidence=100	4e-118	73.41	AT1G23460.1 | Symbols: | Pectin lyase-like superfamily protein | chr1:8327382-8329622 FORWARD LENGTH=460	3e-81	59.72	GO:0005975	carbohydrate_metabolic_process	GO:0004650	polygalacturonase_activity	3.93	0.556	0.721	0.449	2.2	2.28	0.647	-0.601	0.638	1.6	0.035	1	0.829	1	0.061	0.414	0.856	1	1	0.275
13	1071432	TR15548|c4_g1_i6	Susceptible	1542	AH004794	3	1055029	1058885	UniRef100_A0A0K9R319 Uncharacterized protein (Fragment) n=1 Tax=Spinacia oleracea RepID=A0A0K9R319_SPIOL	0	87.21	UniRef100_A0A061E682 ATP binding protein, putative isoform 1 n=2 Tax=Theobroma cacao RepID=A0A061E682_THECC	2e-170	Bv6_148610_fkmn.t1 cDNAEvidence=100	0	85.8	AT1G10650.1 | Symbols: | SBP (S-ribonuclease binding protein) family protein | chr1:3524122-3525318 REVERSE LENGTH=339	3e-130	56.61					-1.08	0.0892	-0.763	-0.399	-0.0118	0.28	1.13	-0.456	-0.227	-0.169	0.353	1	0.485	0.999	0.996	0.921	0.038	0.997	1	0.942
13	1071432	TR28253|c2_g2_i2	Susceptible	607	AH004798	3	1093748	1099761	UniRef100_A0A0J8EVJ0 Uncharacterized protein n=1 Tax=Beta vulgaris subsp. vulgaris RepID=A0A0J8EVJ0_BETVU	5e-127	95.05	UniRef100_UPI0005812B2A PREDICTED: ATP-citrate synthase alpha chain protein 1-like n=1 Tax=Sesamum indicum RepID=UPI0005812B2A	2e-126	Bv6_148560_jggh.t1 cDNAEvidence=100	2e-130	95.05	AT1G10670.4 | Symbols: ACLA-1 | ATP-citrate lyase A-1 | chr1:3535787-3538098 FORWARD LENGTH=423	5e-123	90.1	GO:0000271 GO:0006084 GO:0006085 GO:0006633 GO:0007568 GO:0009825 GO:0009911 GO:0009932 GO:0010025 GO:0010817 GO:0015995 GO:0016117 GO:0019252 GO:0019344 GO:0030244 GO:0043481 GO:0045793 GO:0045995 GO:0048193 GO:0048366 GO:0048767 GO:0071555	polysaccharide_biosynthetic_process acetyl-CoA_metabolic_process acetyl-CoA_biosynthetic_process fatty_acid_biosynthetic_process aging multidimensional_cell_growth positive_regulation_of_flower_development cell_tip_growth wax_biosynthetic_process regulation_of_hormone_levels chlorophyll_biosynthetic_process carotenoid_biosynthetic_process starch_biosynthetic_process cysteine_biosynthetic_process …	GO:0003878	ATP_citrate_synthase_activity	-1.13	-0.0155	-0.0919	-0.301	-0.717	-1.81	0.053	-0.088	-0.11	-1.66	0.287	1	0.986	1	0.171	0.053	0.989	1	1	0
13	1071432	TR13496|c0_g1_i3	Susceptible	1051	AH004799	3	1104557	1105708	UniRef100_A0A0J8C4R2 Uncharacterized protein n=1 Tax=Beta vulgaris subsp. vulgaris RepID=A0A0J8C4R2_BETVU	5e-162	67.58	UniRef100_D0ENL6 F-box/kelch protein n=1 Tax=Vitis vinifera RepID=D0ENL6_VITVI	9e-96	Bv6_148540_kkkj.t1 cDNAEvidence=100	2e-165	67.58	AT1G23390.1 | Symbols: | Kelch repeat-containing F-box family protein | chr1:8309449-8310633 REVERSE LENGTH=394	2e-68	37.8	GO:0008150	biological_process	GO:0003674	molecular_function	2.61	0.657	0.112	0.734	1.1	2.58	-0.553	1.12	-0.00928	2.02	0.065	0.973	0.99	0.932	0.153	0.106	0.811	0.521	1	0.003
14	1325941	TR28582|c4_g1_i3	Resistant	1233	AH004817	3	1276154	1280400	UniRef100_A0A0J8C680 Uncharacterized protein n=1 Tax=Beta vulgaris subsp. vulgaris RepID=A0A0J8C680_BETVU	0	82.35	UniRef100_B9HLQ4 Phototropic-responsive NPH3 family protein n=1 Tax=Populus trichocarpa RepID=B9HLQ4_POPTR	0	Bv6_148440_kjas.t1 cDNAEvidence=100	0	82.35	AT1G67900.3 | Symbols: | Phototropic-responsive NPH3 family protein | chr1:25467737-25469888 FORWARD LENGTH=631	1e-165	70.1	GO:0009416	response_to_light_stimulus	GO:0004871	signal_transducer_activity	-1.89	-0.126	-0.373	0.109	-1.5	-0.218	0.332	-0.382	-0.0528	-0.114	0.084	1	0.884	1	0.002	0.949	0.863	1	1	0.968
14	1325941	TR41248|c0_g1_i4	Resistant	1166	AH004819	3	1324227	1324949	No hit E<10-10	NA	NA	No informative hit E<10-10	NA	No informative hit E<10-10	NA	NA	No informative hit E<10-6	NA	NA	NA	NA	NA	NA	-4.54	-0.836	-1.07	-1.93	-0.697	1.37	0.514	1.22	-0.211	-0.147	0.013	1	0.724	0.268	0.577	0.732	0.917	0.852	1	0.982
14	1325941	TR10873|c0_g1_i2	Resistant	3038	AH004822	3	1339304	1350241	UniRef100_A0A0K9R0N5 Uncharacterized protein n=1 Tax=Spinacia oleracea RepID=A0A0K9R0N5_SPIOL	0	67.42	UniRef100_UPI0005402981 PREDICTED: trithorax group protein osa isoform X2 n=1 Tax=Beta vulgaris subsp. vulgaris RepID=UPI0005402981	0	Bv6_148260_trah.t1 cDNAEvidence=100	0	66.47	AT1G70620.3 | Symbols: | cyclin-related | chr1:26626634-26630777 FORWARD LENGTH=957	2e-39	31.42	GO:0008150	biological_process	GO:0003674	molecular_function	-1.41	-0.339	-0.393	-0.292	-0.391	-0.383	-0.315	0.208	-0.119	-0.157	0.027	0.94	0.669	0.981	0.34	0.782	0.705	1	1	0.906
14	1325941	TR2790|c1_g1_i4	Resistant	2001	AH004824	3	1364077	1368711	UniRef100_A0A0J8EWU5 Uncharacterized protein n=1 Tax=Beta vulgaris subsp. vulgaris RepID=A0A0J8EWU5_BETVU	1e-139	77.33	UniRef100_A0A061E7M0 Tetratricopeptide repeat-like superfamily protein n=1 Tax=Theobroma cacao RepID=A0A061E7M0_THECC	1e-103	Bv6_148190_yuog.t1 cDNAEvidence=100	4e-143	77.33	AT3G26580.1 | Symbols: | Tetratricopeptide repeat (TPR)-like superfamily protein | chr3:9758933-9760349 FORWARD LENGTH=350	7e-99	72.73	GO:0008150 GO:0015996	biological_process chlorophyll_catabolic_process			1.64	-0.0575	0.279	0.459	0.962	-1.19	-0.374	0.108	-0.426	-0.496	0.023	1	0.848	0.77	0.021	0.204	0.667	1	0.826	0.562
15	7509451	TR44989|c2_g3_i2	Overlap	1415	AH005393	3	7479105	7485228	UniRef100_A0A0J8EYG6 Uncharacterized protein n=2 Tax=Beta vulgaris subsp. vulgaris RepID=A0A0J8EYG6_BETVU	0	80.92	UniRef100_UPI0002C369D4 PREDICTED: homocysteine S-methyltransferase 1 n=1 Tax=Fragaria vesca subsp. vesca RepID=UPI0002C369D4	6e-167	Bv6_141890_oepq.t1 cDNAEvidence=100	0	80.92	AT3G25900.1 | Symbols: HMT-1, ATHMT-1 | Homocysteine S-methyltransferase family protein | chr3:9480964-9482684 FORWARD LENGTH=326	8e-167	68.63	GO:0009086	methionine_biosynthetic_process	GO:0008898	S-adenosylmethionine-homocysteine_S-methyltransferase_activity	2.06	1.5	0.501	-0.102	0.161	1.65	1.17	0.257	-0.212	0.437	0.039	0.004	0.761	1	0.849	0.159	0.013	1	1	0.749
15	7509451	TR26477|c0_g1_i1	Resistant	1185	AH005402	3	7563848	7568875	UniRef100_A0A0J8C3C3 Uncharacterized protein n=1 Tax=Beta vulgaris subsp. vulgaris RepID=A0A0J8C3C3_BETVU	8e-129	79.55	UniRef100_UPI0005209B9F PREDICTED: dihydrolipoyllysine-residue acetyltransferase component 4 of pyruvate dehydrogenase complex, chloroplastic-like n=1 Tax=Nicotiana sylvestris RepID=UPI0005209B9F	7e-106	Bv6_142150_xafo.t1 cDNAEvidence=100	3e-132	79.55	AT3G25860.1 | Symbols: LTA2, PLE2 | 2-oxoacid dehydrogenases acyltransferase family protein | chr3:9460632-9462585 FORWARD LENGTH=480	1e-89	62.95	GO:0000096 GO:0006084 GO:0006086 GO:0006546 GO:0006636 GO:0006733 GO:0006766 GO:0007020 GO:0008152 GO:0008652 GO:0009072 GO:0009106 GO:0009108 GO:0009117 GO:0009695 GO:0016126 GO:0016132 GO:0019288 GO:0019748 GO:0044272	sulfur_amino_acid_metabolic_process acetyl-CoA_metabolic_process acetyl-CoA_biosynthetic_process_from_pyruvate glycine_catabolic_process unsaturated_fatty_acid_biosynthetic_process oxidoreduction_coenzyme_metabolic_process vitamin_metabolic_process microtubule_nucleation metabolic_process cellular_amino_acid_biosynthetic_process aromatic_amino_acid_family_metabolic_process lipoate_metabolic_proce…	GO:0004742	dihydrolipoyllysine-residue_acetyltransferase_activity	-2.09	-0.306	-0.518	0.111	-1.37	-0.178	-0.227	0.0733	0.12	-0.145	0.052	1	0.772	1	0.01	0.962	0.932	1	1	0.96
15	7509451	TR44989|c2_g3_i2	Susceptible	1415	AH005393	3	7479105	7485228	UniRef100_A0A0J8EYG6 Uncharacterized protein n=2 Tax=Beta vulgaris subsp. vulgaris RepID=A0A0J8EYG6_BETVU	0	80.92	UniRef100_UPI0002C369D4 PREDICTED: homocysteine S-methyltransferase 1 n=1 Tax=Fragaria vesca subsp. vesca RepID=UPI0002C369D4	6e-167	Bv6_141890_oepq.t1 cDNAEvidence=100	0	80.92	AT3G25900.1 | Symbols: HMT-1, ATHMT-1 | Homocysteine S-methyltransferase family protein | chr3:9480964-9482684 FORWARD LENGTH=326	8e-167	68.63	GO:0009086	methionine_biosynthetic_process	GO:0008898	S-adenosylmethionine-homocysteine_S-methyltransferase_activity	2.06	1.5	0.501	-0.102	0.161	1.65	1.17	0.257	-0.212	0.437	0.039	0.004	0.761	1	0.849	0.159	0.013	1	1	0.749
15	7509451	TR35022|c0_g3_i1	Susceptible	764	AH005398	3	7515747	7517300	UniRef100_A0A0K9RMK6 Uncharacterized protein n=1 Tax=Spinacia oleracea RepID=A0A0K9RMK6_SPIOL	7e-38	44.66	UniRef100_UPI00053FF0CA PREDICTED: uncharacterized protein LOC104896504 isoform X4 n=1 Tax=Beta vulgaris subsp. vulgaris RepID=UPI00053FF0CA	1e-34	Bv6_141950_gmyf.t1 cDNAEvidence=100	5e-38	43.13	AT3G25890.2 | Symbols: | Integrase-type DNA-binding superfamily protein | chr3:9476052-9477050 FORWARD LENGTH=332	3e-06	44.68	GO:0006355	regulation_of_transcription,_DNA-templated	GO:0003677 GO:0003700	DNA_binding sequence-specific_DNA_binding_transcription_factor_activity	-1.06	-0.62	-0.517	-0.0784	0.155	-4.44	-0.742	-1.64	-1.21	-0.841	0.689	1	0.905	1	0.934	0.007	0.78	0.397	0.641	0.754
16	2713303	TR30261|c0_g3_i2	Resistant	655	AH006720	4	2675470	2687768	UniRef100_S4S5M3 Ah24 n=1 Tax=Amaranthus hypochondriacus RepID=S4S5M3_AMAHP	1e-103	92.07	UniRef100_S4S5M3 Ah24 n=1 Tax=Amaranthus hypochondriacus RepID=S4S5M3_AMAHP	1e-103	Bv3_062410_itge.t1 cDNAEvidence=80	6e-57	56.35	No informative hit E<10-6	NA	NA	NA	NA	NA	NA	17.1	-0.937	8.19	3.01	6.81	4.51	1.71	-0.743	-2.19	5.74	0.023	1	0.353	0.984	0.143	1	0.879	1	1	0.438
16	2713303	TR41239|c1_g1_i1	Resistant	884	AH006721	4	2715598	2722272	UniRef100_UPI00052EE72F PREDICTED: probable tocopherol O-methyltransferase, chloroplastic isoform X1 n=1 Tax=Nelumbo nucifera RepID=UPI00052EE72F	2e-117	65.43	UniRef100_UPI00052EE72F PREDICTED: probable tocopherol O-methyltransferase, chloroplastic isoform X1 n=1 Tax=Nelumbo nucifera RepID=UPI00052EE72F	2e-117	Bv3_049450_nsog.t1 cDNAEvidence=100	2e-119	66.67	AT1G64970.1 | Symbols: G-TMT, TMT1, VTE4 | gamma-tocopherol methyltransferase | chr1:24134337-24135993 REVERSE LENGTH=348	2e-94	56.02	GO:0010189	vitamin_E_biosynthetic_process	GO:0050342	tocopherol_O-methyltransferase_activity	0.431	1.23	0.996	0.398	-2.2	-1.82	-0.241	-0.258	-0.218	-1.1	0.903	0.751	0.719	1	0.015	0.536	0.965	1	1	0.54
16	2713303	TR12437|c1_g1_i1	Resistant	2767	AH006723	4	2747465	2751711	UniRef100_A0A0K9RUY2 Uncharacterized protein n=1 Tax=Spinacia oleracea RepID=A0A0K9RUY2_SPIOL	0	69.85	UniRef100_UPI00053FA74D PREDICTED: ABC transporter G family member 11-like isoform X2 n=1 Tax=Beta vulgaris subsp. vulgaris RepID=UPI00053FA74D	0	Bv6_134800_ifmu.t1 cDNAEvidence=100	0	59.3	AT1G17840.1 | Symbols: WBC11, ABCG11, DSO, COF1, ATWBC11 | white-brown complex homolog protein 11 | chr1:6142870-6145894 FORWARD LENGTH=703	2e-173	49.92	GO:0009611 GO:0009651 GO:0009737 GO:0010222 GO:0010588 GO:0015908 GO:0080051	response_to_wounding response_to_salt_stress response_to_abscisic_acid stem_vascular_tissue_pattern_formation cotyledon_vascular_tissue_pattern_formation fatty_acid_transport cutin_transport	GO:0005515 GO:0015245 GO:0042626 GO:0042803	protein_binding fatty_acid_transporter_activity ATPase_activity,_coupled_to_transmembrane_movement_of_substances protein_homodimerization_activity	3.14	0.55	0.862	0.856	0.869	-0.754	-0.452	-0.705	0.23	0.173	0.015	1	0.627	0.77	0.279	0.798	0.851	0.94	1	0.962
16	2713303	TR12437|c2_g4_i1	Resistant	1628	AH006724	4	2752513	2759034	UniRef100_A0A0K9S0T3 Eukaryotic translation initiation factor 3 subunit C n=1 Tax=Spinacia oleracea RepID=A0A0K9S0T3_SPIOL	0	87.82	UniRef100_A0A0K9S0T3 Eukaryotic translation initiation factor 3 subunit C n=1 Tax=Spinacia oleracea RepID=A0A0K9S0T3_SPIOL	0	Bv5_099270_phis.t1 cDNAEvidence=100	2e-179	91.39	AT3G56150.2 | Symbols: EIF3C | eukaryotic translation initiation factor 3C | chr3:20833790-20836820 REVERSE LENGTH=900	0	74.91			GO:0003743	translation_initiation_factor_activity	-0.977	-0.117	-0.219	0.165	-0.805	-0.551	-0.522	0.205	-0.00685	-0.227	0.195	1	0.895	1	0.027	0.658	0.313	1	1	0.846
16	2713303	TR30261|c0_g3_i2	Susceptible	655	AH006720	4	2675470	2687768	UniRef100_S4S5M3 Ah24 n=1 Tax=Amaranthus hypochondriacus RepID=S4S5M3_AMAHP	1e-103	92.07	UniRef100_S4S5M3 Ah24 n=1 Tax=Amaranthus hypochondriacus RepID=S4S5M3_AMAHP	1e-103	Bv3_062410_itge.t1 cDNAEvidence=80	6e-57	56.35	No informative hit E<10-6	NA	NA	NA	NA	NA	NA	17.1	-0.937	8.19	3.01	6.81	4.51	1.71	-0.743	-2.19	5.74	0.023	1	0.353	0.984	0.143	1	0.879	1	1	0.438
17	5166140	TR7809|c3_g5_i9	Resistant	1434	AH006923	4	5129843	5157049	UniRef100_A0A0J8FID3 Uncharacterized protein n=1 Tax=Beta vulgaris subsp. vulgaris RepID=A0A0J8FID3_BETVU	0	77.18	UniRef100_UPI00051B9CCC PREDICTED: uncharacterized protein LOC104098402 isoform X2 n=1 Tax=Nicotiana tomentosiformis RepID=UPI00051B9CCC	1e-128	Bv3_056220_tirq.t1 cDNAEvidence=100	0	77.18	AT3G13460.1 | Symbols: ECT2 | evolutionarily conserved C-terminal region 2 | chr3:4385274-4388220 REVERSE LENGTH=667	5e-110	58.14			GO:0005515	protein_binding	-1.21	-0.0391	-0.284	0.215	-1.1	-0.454	-0.684	0.124	0.067	0.0392	0.304	1	0.917	1	0.042	0.847	0.42	1	1	0.995
17	5166140	TR33297|c1_g1_i1	Resistant	1724	AH006924	4	5157533	5164069	UniRef100_A0A0J8CUL6 Uncharacterized protein n=1 Tax=Beta vulgaris subsp. vulgaris RepID=A0A0J8CUL6_BETVU	3e-124	83.57	UniRef100_A0A0F7GZ83 Photosynthetic NDH subcomplex B 2 n=1 Tax=Melianthus villosus RepID=A0A0F7GZ83_9ROSI	2e-109	Bv3_056240_yegx.t1 cDNAEvidence=100	1e-127	83.57	AT1G64770.1 | Symbols: NDF2, NDH45 | NDH-dependent cyclic electron flow 1 | chr1:24057549-24059415 FORWARD LENGTH=348	3e-94	65.26	GO:0006098 GO:0009773 GO:0010264	pentose-phosphate_shunt photosynthetic_electron_transport_in_photosystem_I myo-inositol_hexakisphosphate_biosynthetic_process			1.06	0.283	0.0701	-0.104	0.815	0.326	0.246	-0.0394	0.141	-0.0215	0.245	1	0.989	1	0.045	0.875	0.877	1	1	0.998
17	5166140	TR40755|c1_g1_i1	Resistant	1178	AH006927	4	5170886	5179519	UniRef100_A0A0K9QL79 Uncharacterized protein n=1 Tax=Spinacia oleracea RepID=A0A0K9QL79_SPIOL	2e-128	80.95	UniRef100_A0A061DYG8 NIFU-like protein 2 isoform 1 n=1 Tax=Theobroma cacao RepID=A0A061DYG8_THECC	4e-104	Bv5_109880_gami.t1 cDNAEvidence=72.7	2e-126	79.1	AT5G49940.1 | Symbols: NFU2, ATCNFU2 | NIFU-like protein 2 | chr5:20315464-20317228 FORWARD LENGTH=235	1e-98	79.46	GO:0009658 GO:0016226	chloroplast_organization iron-sulfur_cluster_assembly	GO:0005198	structural_molecule_activity	2.36	0.34	1.05	0.578	0.397	0.906	0.218	0.631	0.0317	0.025	0.047	1	0.37	0.96	0.618	0.692	0.946	0.946	1	1
17	5166140	TR44361|c2_g1_i3	Susceptible	3429	AH006931	4	5206298	5210852	UniRef100_A0A0J8CUN0 Uncharacterized protein n=1 Tax=Beta vulgaris subsp. vulgaris RepID=A0A0J8CUN0_BETVU	0	81.34	UniRef100_UPI00032A9BB4 PREDICTED: glucan endo-1,3-beta-glucosidase 8-like n=1 Tax=Cicer arietinum RepID=UPI00032A9BB4	0	Bv3_056390_orkx.t1 cDNAEvidence=100	0	81.34	AT1G64760.2 | Symbols: | O-Glycosyl hydrolases family 17 protein | chr1:24054220-24056194 REVERSE LENGTH=481	0	65.93			GO:0004553	hydrolase_activity,_hydrolyzing_O-glycosyl_compounds	0.152	-0.00641	0.0197	-0.0415	0.18	0.946	-0.136	0.289	-0.0769	0.869	0.927	1	1	1	0.749	0.414	0.948	1	1	0.037
18	23172165	TR22791|c3_g1_i1	Overlap	969	AH007773	4	23183214	23189617	UniRef100_A0A0J8CIR4 Uncharacterized protein n=1 Tax=Beta vulgaris subsp. vulgaris RepID=A0A0J8CIR4_BETVU	2e-148	84.48	UniRef100_Q767A2 Cysteine synthase like protein n=1 Tax=Spinacia oleracea RepID=Q767A2_SPIOL	1e-147	Bv4_082410_mmyg.t1 cDNAEvidence=100	1e-151	84.48	AT3G04940.1 | Symbols: ATCYSD1, CYSD1 | cysteine synthase D1 | chr3:1365681-1367508 FORWARD LENGTH=324	1e-117	66.78	GO:0000096 GO:0008652 GO:0009069 GO:0019344 GO:0042545	sulfur_amino_acid_metabolic_process cellular_amino_acid_biosynthetic_process serine_family_amino_acid_metabolic_process cysteine_biosynthetic_process cell_wall_modification	GO:0004124	cysteine_synthase_activity	-1.84	1.16	0.362	-0.941	-2.42	5.95	0.565	2.6	2.02	0.76	0.618	0.999	0.974	1	0.105	0.028	0.935	0.388	0.616	0.876
18	23172165	TR22957|c2_g1_i2	Resistant	569	AH007767	4	23144587	23145759	UniRef100_A0A0K9R222 Uncharacterized protein n=1 Tax=Spinacia oleracea RepID=A0A0K9R222_SPIOL	8e-72	89.83	UniRef100_UPI00053F8F32 PREDICTED: LOW QUALITY PROTEIN: DNA-damage-repair/toleration protein DRT102 n=1 Tax=Beta vulgaris subsp. vulgaris RepID=UPI00053F8F32	4e-69	Bv4_082020_ugsa.t1 cDNAEvidence=100	5e-14	91.18	AT3G04880.1 | Symbols: DRT102 | DNA-damage-repair/toleration protein (DRT102) | chr3:1346431-1347363 REVERSE LENGTH=310	5e-67	78.81	GO:0000719 GO:0009409 GO:0009411	photoreactive_repair response_to_cold response_to_UV			5.59	1.4	2.03	-0.0458	2.21	0.869	0.583	0.645	0.091	-0.449	0.01	0.844	0.344	1	0.097	0.883	0.902	1	1	0.931
18	23172165	TR40796|c4_g2_i4	Resistant	2115	AH007770	4	23157463	23160866	UniRef100_A0A0K9QS92 Uncharacterized protein n=1 Tax=Spinacia oleracea RepID=A0A0K9QS92_SPIOL	5e-40	92.86	UniRef100_A0A0A9HDM2 CDA2-L n=1 Tax=Arundo donax RepID=A0A0A9HDM2_ARUDO	2e-38	Bv4_082360_zzxz.t1 cDNAEvidence=100	1e-42	92.86	AT5G28050.1 | Symbols: | Cytidine/deoxycytidylate deaminase family protein | chr5:10044209-10045755 REVERSE LENGTH=185	3e-38	84.69	GO:0006152	purine_nucleoside_catabolic_process	GO:0008270 GO:0016787 GO:0047974	zinc_ion_binding hydrolase_activity guanosine_deaminase_activity	1.51	0.165	0.73	-0.314	0.928	0.0932	0.612	-0.568	-0.111	0.16	0.069	1	0.395	1	0.015	0.98	0.363	0.799	1	0.925
18	23172165	TR5141|c0_g1_i1	Resistant	2740	AH007774	4	23192346	23228275	UniRef100_UPI00053FCF6C PREDICTED: protein MON2 homolog isoform X2 n=1 Tax=Beta vulgaris subsp. vulgaris RepID=UPI00053FCF6C	0	86.75	UniRef100_UPI00053FCF6C PREDICTED: protein MON2 homolog isoform X2 n=1 Tax=Beta vulgaris subsp. vulgaris RepID=UPI00053FCF6C	0	Bv4_082420_ktgz.t1 cDNAEvidence=100	0	86.56	AT5G27970.1 | Symbols: | ARM repeat superfamily protein | chr5:10004720-10015429 FORWARD LENGTH=1630	0	66.99	GO:0006891 GO:0050790	intra-Golgi_vesicle-mediated_transport regulation_of_catalytic_activity	GO:0005086	ARF_guanyl-nucleotide_exchange_factor_activity	-2.58	-0.324	-0.904	-0.179	-1.17	-0.573	-0.512	0.199	-0.348	0.0878	0.035	1	0.489	1	0.15	0.824	0.733	1	1	0.982
18	23172165	TR22791|c3_g1_i1	Susceptible	969	AH007773	4	23183214	23189617	UniRef100_A0A0J8CIR4 Uncharacterized protein n=1 Tax=Beta vulgaris subsp. vulgaris RepID=A0A0J8CIR4_BETVU	2e-148	84.48	UniRef100_Q767A2 Cysteine synthase like protein n=1 Tax=Spinacia oleracea RepID=Q767A2_SPIOL	1e-147	Bv4_082410_mmyg.t1 cDNAEvidence=100	1e-151	84.48	AT3G04940.1 | Symbols: ATCYSD1, CYSD1 | cysteine synthase D1 | chr3:1365681-1367508 FORWARD LENGTH=324	1e-117	66.78	GO:0000096 GO:0008652 GO:0009069 GO:0019344 GO:0042545	sulfur_amino_acid_metabolic_process cellular_amino_acid_biosynthetic_process serine_family_amino_acid_metabolic_process cysteine_biosynthetic_process cell_wall_modification	GO:0004124	cysteine_synthase_activity	-1.84	1.16	0.362	-0.941	-2.42	5.95	0.565	2.6	2.02	0.76	0.618	0.999	0.974	1	0.105	0.028	0.935	0.388	0.616	0.876
19	23691965	TR12199|c0_g4_i4	Overlap	1828	AH007811	4	23686487	23693667	UniRef100_A0A0K9QBB5 Uncharacterized protein n=1 Tax=Spinacia oleracea RepID=A0A0K9QBB5_SPIOL	0	75.41	UniRef100_UPI00051BDC42 PREDICTED: protein ZINC INDUCED FACILITATOR-LIKE 1-like isoform X1 n=2 Tax=Nicotiana tomentosiformis RepID=UPI00051BDC42	0	Bv3_064370_hfho.t1 cDNAEvidence=100	0	58.74	AT5G13750.1 | Symbols: ZIFL1 | zinc induced facilitator-like 1 | chr5:4438318-4441289 FORWARD LENGTH=478	0	60	GO:0009414 GO:0009630 GO:0010540 GO:0048364 GO:0080167 GO:0090333	response_to_water_deprivation gravitropism basipetal_auxin_transport root_development response_to_karrikin regulation_of_stomatal_closure	GO:0022821	potassium_ion_antiporter_activity	4.59	0.713	1.85	1	1.02	4.66	0.894	1.3	1.53	0.937	0.002	0.977	0.193	0.826	0.249	0.001	0.632	0.643	0.332	0.602
19	23691965	TR21740|c0_g4_i2	Overlap	721	AH007813	4	23708400	23713686	UniRef100_A0A0K9RQ24 Uncharacterized protein n=1 Tax=Spinacia oleracea RepID=A0A0K9RQ24_SPIOL	1e-58	87.4	UniRef100_UPI0005FC0177 PREDICTED: uncharacterized protein OsI_027940-like n=1 Tax=Jatropha curcas RepID=UPI0005FC0177	2e-55	Bv4_094870_jujt.t2 cDNAEvidence=92.3	4e-55	83.84	AT3G03773.1 | Symbols: | HSP20-like chaperones superfamily protein | chr3:951885-953490 FORWARD LENGTH=150	1e-28	50	GO:0008150	biological_process	GO:0003674	molecular_function	4.36	1.21	0.777	-0.439	2.81	5.47	2.23	1.14	1.39	0.714	0.014	0.737	0.844	1	0.001	0	0.013	0.863	0.658	0.763
19	23691965	TR12199|c0_g4_i4	Resistant	1828	AH007811	4	23686487	23693667	UniRef100_A0A0K9QBB5 Uncharacterized protein n=1 Tax=Spinacia oleracea RepID=A0A0K9QBB5_SPIOL	0	75.41	UniRef100_UPI00051BDC42 PREDICTED: protein ZINC INDUCED FACILITATOR-LIKE 1-like isoform X1 n=2 Tax=Nicotiana tomentosiformis RepID=UPI00051BDC42	0	Bv3_064370_hfho.t1 cDNAEvidence=100	0	58.74	AT5G13750.1 | Symbols: ZIFL1 | zinc induced facilitator-like 1 | chr5:4438318-4441289 FORWARD LENGTH=478	0	60	GO:0009414 GO:0009630 GO:0010540 GO:0048364 GO:0080167 GO:0090333	response_to_water_deprivation gravitropism basipetal_auxin_transport root_development response_to_karrikin regulation_of_stomatal_closure	GO:0022821	potassium_ion_antiporter_activity	4.59	0.713	1.85	1	1.02	4.66	0.894	1.3	1.53	0.937	0.002	0.977	0.193	0.826	0.249	0.001	0.632	0.643	0.332	0.602
19	23691965	TR12199|c0_g4_i4	Susceptible	1828	AH007811	4	23686487	23693667	UniRef100_A0A0K9QBB5 Uncharacterized protein n=1 Tax=Spinacia oleracea RepID=A0A0K9QBB5_SPIOL	0	75.41	UniRef100_UPI00051BDC42 PREDICTED: protein ZINC INDUCED FACILITATOR-LIKE 1-like isoform X1 n=2 Tax=Nicotiana tomentosiformis RepID=UPI00051BDC42	0	Bv3_064370_hfho.t1 cDNAEvidence=100	0	58.74	AT5G13750.1 | Symbols: ZIFL1 | zinc induced facilitator-like 1 | chr5:4438318-4441289 FORWARD LENGTH=478	0	60	GO:0009414 GO:0009630 GO:0010540 GO:0048364 GO:0080167 GO:0090333	response_to_water_deprivation gravitropism basipetal_auxin_transport root_development response_to_karrikin regulation_of_stomatal_closure	GO:0022821	potassium_ion_antiporter_activity	4.59	0.713	1.85	1	1.02	4.66	0.894	1.3	1.53	0.937	0.002	0.977	0.193	0.826	0.249	0.001	0.632	0.643	0.332	0.602
20	23961798	TR45874|c1_g2_i3	Overlap	720	AH007840	4	23956162	23958936	UniRef100_A0A0K9RMW5 Uncharacterized protein n=1 Tax=Spinacia oleracea RepID=A0A0K9RMW5_SPIOL	4e-89	89.66	UniRef100_A0A0B0NKR1 Microsomal glutathione S-transferase 3 n=1 Tax=Gossypium arboreum RepID=A0A0B0NKR1_GOSAR	4e-76	Bv4_084500_cgqi.t1 cDNAEvidence=100	1e-87	82.88	AT1G65820.1 | Symbols: | microsomal glutathione s-transferase, putative | chr1:24485213-24486682 FORWARD LENGTH=146	2e-76	71.23	GO:0002540 GO:0006888 GO:0019370 GO:0055114	leukotriene_production_involved_in_inflammatory_response ER_to_Golgi_vesicle-mediated_transport leukotriene_biosynthetic_process oxidation-reduction_process	GO:0004364 GO:0004602	glutathione_transferase_activity glutathione_peroxidase_activity	4.36	1.22	1.19	0.561	1.38	5.19	1.74	1.44	1.11	0.899	0	0.492	0.43	1	0.065	0	0.028	0.312	0.6	0.538
20	23961798	TR45874|c1_g2_i3	Resistant	720	AH007840	4	23956162	23958936	UniRef100_A0A0K9RMW5 Uncharacterized protein n=1 Tax=Spinacia oleracea RepID=A0A0K9RMW5_SPIOL	4e-89	89.66	UniRef100_A0A0B0NKR1 Microsomal glutathione S-transferase 3 n=1 Tax=Gossypium arboreum RepID=A0A0B0NKR1_GOSAR	4e-76	Bv4_084500_cgqi.t1 cDNAEvidence=100	1e-87	82.88	AT1G65820.1 | Symbols: | microsomal glutathione s-transferase, putative | chr1:24485213-24486682 FORWARD LENGTH=146	2e-76	71.23	GO:0002540 GO:0006888 GO:0019370 GO:0055114	leukotriene_production_involved_in_inflammatory_response ER_to_Golgi_vesicle-mediated_transport leukotriene_biosynthetic_process oxidation-reduction_process	GO:0004364 GO:0004602	glutathione_transferase_activity glutathione_peroxidase_activity	4.36	1.22	1.19	0.561	1.38	5.19	1.74	1.44	1.11	0.899	0	0.492	0.43	1	0.065	0	0.028	0.312	0.6	0.538
20	23961798	TR40547|c1_g1_i3	Resistant	2200	AH007843	4	23978707	23987570	UniRef100_A0A0K9RQV2 Uncharacterized protein n=1 Tax=Spinacia oleracea RepID=A0A0K9RQV2_SPIOL	0	85.98	UniRef100_UPI00052E811E PREDICTED: beta-catenin-like protein 1 n=1 Tax=Nelumbo nucifera RepID=UPI00052E811E	0	Bv4_084580_tfao.t1 cDNAEvidence=87	0	86.93	AT3G02710.1 | Symbols: | ARM repeat superfamily protein | chr3:583184-585780 FORWARD LENGTH=529	0	77.38	GO:0008380 GO:0042732	RNA_splicing D-xylose_metabolic_process			-1.42	-0.151	-0.0898	0.0182	-1.19	-0.857	-0.146	-0.0518	-0.191	-0.468	0.156	1	0.986	1	0.011	0.571	0.951	1	1	0.657
20	23961798	TR45874|c1_g2_i3	Susceptible	720	AH007840	4	23956162	23958936	UniRef100_A0A0K9RMW5 Uncharacterized protein n=1 Tax=Spinacia oleracea RepID=A0A0K9RMW5_SPIOL	4e-89	89.66	UniRef100_A0A0B0NKR1 Microsomal glutathione S-transferase 3 n=1 Tax=Gossypium arboreum RepID=A0A0B0NKR1_GOSAR	4e-76	Bv4_084500_cgqi.t1 cDNAEvidence=100	1e-87	82.88	AT1G65820.1 | Symbols: | microsomal glutathione s-transferase, putative | chr1:24485213-24486682 FORWARD LENGTH=146	2e-76	71.23	GO:0002540 GO:0006888 GO:0019370 GO:0055114	leukotriene_production_involved_in_inflammatory_response ER_to_Golgi_vesicle-mediated_transport leukotriene_biosynthetic_process oxidation-reduction_process	GO:0004364 GO:0004602	glutathione_transferase_activity glutathione_peroxidase_activity	4.36	1.22	1.19	0.561	1.38	5.19	1.74	1.44	1.11	0.899	0	0.492	0.43	1	0.065	0	0.028	0.312	0.6	0.538
21	25197157	TR87604|c1_g4_i7	Overlap	1715	AH007960	4	25195971	25203744	UniRef100_A0A0K9R9J8 Uncharacterized protein (Fragment) n=1 Tax=Spinacia oleracea RepID=A0A0K9R9J8_SPIOL	3e-124	72.16	UniRef100_UPI00051B2941 PREDICTED: cytochrome P450 CYP72A219-like n=1 Tax=Nicotiana tomentosiformis RepID=UPI00051B2941	2e-100	Bv4_093990_kkod.t1 cDNAEvidence=100	6e-125	71.6	AT3G14680.1 | Symbols: CYP72A14 | cytochrome P450, family 72, subfamily A, polypeptide 14 | chr3:4934478-4936462 FORWARD LENGTH=512	5e-91	53.9	GO:0000041	transition_metal_ion_transport	GO:0019825	oxygen_binding	4.94	2.02	1.13	-1.19	2.98	8.19	2.74	1.52	1.08	2.85	0.073	0.631	0.83	0.999	0.025	0	0.146	0.89	0.991	0.073
21	25197157	TR34266|c1_g2_i2	Overlap	1688	AH007961	4	25204622	25208166	UniRef100_A0A0J8BA81 Uncharacterized protein n=1 Tax=Beta vulgaris subsp. vulgaris RepID=A0A0J8BA81_BETVU	0	77.26	UniRef100_UPI00053F9ED6 PREDICTED: cytochrome P450 CYP72A219-like n=1 Tax=Beta vulgaris subsp. vulgaris RepID=UPI00053F9ED6	0	Bv4_093980_hrrf.t1 cDNAEvidence=100	0	77.26	AT3G14690.1 | Symbols: CYP72A15 | cytochrome P450, family 72, subfamily A, polypeptide 15 | chr3:4937410-4939310 FORWARD LENGTH=512	0	53.81			GO:0019825	oxygen_binding	4.89	0.868	1.55	1.3	1.17	3.65	1.04	1.03	0.969	0.603	0	0.715	0.058	0.238	0.081	0.001	0.26	0.523	0.574	0.706
21	25197157	TR87604|c1_g4_i7	Resistant	1715	AH007960	4	25195971	25203744	UniRef100_A0A0K9R9J8 Uncharacterized protein (Fragment) n=1 Tax=Spinacia oleracea RepID=A0A0K9R9J8_SPIOL	3e-124	72.16	UniRef100_UPI00051B2941 PREDICTED: cytochrome P450 CYP72A219-like n=1 Tax=Nicotiana tomentosiformis RepID=UPI00051B2941	2e-100	Bv4_093990_kkod.t1 cDNAEvidence=100	6e-125	71.6	AT3G14680.1 | Symbols: CYP72A14 | cytochrome P450, family 72, subfamily A, polypeptide 14 | chr3:4934478-4936462 FORWARD LENGTH=512	5e-91	53.9	GO:0000041	transition_metal_ion_transport	GO:0019825	oxygen_binding	4.94	2.02	1.13	-1.19	2.98	8.19	2.74	1.52	1.08	2.85	0.073	0.631	0.83	0.999	0.025	0	0.146	0.89	0.991	0.073
21	25197157	TR34266|c1_g2_i2	Resistant	1688	AH007961	4	25204622	25208166	UniRef100_A0A0J8BA81 Uncharacterized protein n=1 Tax=Beta vulgaris subsp. vulgaris RepID=A0A0J8BA81_BETVU	0	77.26	UniRef100_UPI00053F9ED6 PREDICTED: cytochrome P450 CYP72A219-like n=1 Tax=Beta vulgaris subsp. vulgaris RepID=UPI00053F9ED6	0	Bv4_093980_hrrf.t1 cDNAEvidence=100	0	77.26	AT3G14690.1 | Symbols: CYP72A15 | cytochrome P450, family 72, subfamily A, polypeptide 15 | chr3:4937410-4939310 FORWARD LENGTH=512	0	53.81			GO:0019825	oxygen_binding	4.89	0.868	1.55	1.3	1.17	3.65	1.04	1.03	0.969	0.603	0	0.715	0.058	0.238	0.081	0.001	0.26	0.523	0.574	0.706
21	25197157	TR3711|c0_g1_i4	Susceptible	1004	AH007959	4	25185787	25192027	UniRef100_A0A0J8E504 Uncharacterized protein n=1 Tax=Beta vulgaris subsp. vulgaris RepID=A0A0J8E504_BETVU	1e-140	67.71	UniRef100_UPI00046DFCF5 PREDICTED: cytochrome P450 CYP72A219-like n=1 Tax=Prunus mume RepID=UPI00046DFCF5	4e-101	Bv4_093990_kkod.t1 cDNAEvidence=100	4e-144	67.71	AT3G14690.1 | Symbols: CYP72A15 | cytochrome P450, family 72, subfamily A, polypeptide 15 | chr3:4937410-4939310 FORWARD LENGTH=512	4e-77	41.61			GO:0019825	oxygen_binding	1.11	0.148	0.314	0.888	-0.237	6.67	0.956	2.07	2.06	1.59	0.652	1	0.961	0.937	0.871	0	0.645	0.12	0.158	0.191
21	25197157	TR87604|c1_g4_i7	Susceptible	1715	AH007960	4	25195971	25203744	UniRef100_A0A0K9R9J8 Uncharacterized protein (Fragment) n=1 Tax=Spinacia oleracea RepID=A0A0K9R9J8_SPIOL	3e-124	72.16	UniRef100_UPI00051B2941 PREDICTED: cytochrome P450 CYP72A219-like n=1 Tax=Nicotiana tomentosiformis RepID=UPI00051B2941	2e-100	Bv4_093990_kkod.t1 cDNAEvidence=100	6e-125	71.6	AT3G14680.1 | Symbols: CYP72A14 | cytochrome P450, family 72, subfamily A, polypeptide 14 | chr3:4934478-4936462 FORWARD LENGTH=512	5e-91	53.9	GO:0000041	transition_metal_ion_transport	GO:0019825	oxygen_binding	4.94	2.02	1.13	-1.19	2.98	8.19	2.74	1.52	1.08	2.85	0.073	0.631	0.83	0.999	0.025	0	0.146	0.89	0.991	0.073
22	27357312	TR23560|c1_g1_i3	Resistant	2009	AH008182	4	27319138	27325512	UniRef100_A0A0J8CKS6 Uncharacterized protein n=1 Tax=Beta vulgaris subsp. vulgaris RepID=A0A0J8CKS6_BETVU	0	86.17	UniRef100_UPI0005813620 PREDICTED: cyclin-dependent kinase F-4-like isoform X2 n=1 Tax=Sesamum indicum RepID=UPI0005813620	0	Bv4_087780_icga.t1 cDNAEvidence=100	0	86.17	AT4G19110.1 | Symbols: | Protein kinase superfamily protein | chr4:10454770-10457468 REVERSE LENGTH=461	0	66.67	GO:0006487 GO:0045727	protein_N-linked_glycosylation positive_regulation_of_translation	GO:0016301	kinase_activity	-1.51	-0.041	-0.406	-0.177	-0.888	-0.829	-0.336	-0.128	-0.184	-0.181	0.051	1	0.742	1	0.02	0.501	0.77	1	1	0.905
22	27357312	TR106013|c0_g1_i1	Resistant	1028	AH008188	4	27351878	27355716	UniRef100_A0A0J8CKX6 Uncharacterized protein n=1 Tax=Beta vulgaris subsp. vulgaris RepID=A0A0J8CKX6_BETVU	1e-40	92.44	UniRef100_UPI00015C7B3C PREDICTED: UPF0136 membrane protein At2g26240 n=1 Tax=Vitis vinifera RepID=UPI00015C7B3C	4e-35	Bv4_087910_foda.t1 cDNAEvidence=100	5e-44	92.44	AT3G20510.1 | Symbols: | Transmembrane proteins 14C | chr3:7160884-7161991 FORWARD LENGTH=119	3e-32	70.59					2.01	0.803	0.443	0.484	0.277	1.17	0.617	0.00755	0.865	-0.314	0.05	0.648	0.815	0.948	0.712	0.445	0.545	1	0.375	0.857
22	27357312	TR18973|c0_g1_i2	Resistant	616	AH008191	4	27361726	27365811	UniRef100_A0A0J8CGM6 Uncharacterized protein n=1 Tax=Beta vulgaris subsp. vulgaris RepID=A0A0J8CGM6_BETVU	2e-37	75.28	UniRef100_UPI000498F97C PREDICTED: LOW QUALITY PROTEIN: purple acid phosphatase 18-like n=1 Tax=Malus domestica RepID=UPI000498F97C	3e-32	Bv4_088000_uyjq.t1 cDNAEvidence=100	8e-41	75.28	AT3G20500.1 | Symbols: ATPAP18, PAP18 | purple acid phosphatase 18 | chr3:7157926-7160244 FORWARD LENGTH=437	1e-34	54.87	GO:0015824	proline_transport	GO:0003993 GO:0004722	acid_phosphatase_activity protein_serine/threonine_phosphatase_activity	-2.17	-0.429	-0.116	-0.262	-1.37	-1.88	-0.441	-0.114	-0.981	-0.343	0.082	1	0.986	1	0.036	0.169	0.8	1	0.432	0.857
22	27357312	TR15144|c2_g1_i5	Resistant	370	AH008196	4	27408119	27411593	UniRef100_A0A0J8CKX4 Uncharacterized protein n=1 Tax=Beta vulgaris subsp. vulgaris RepID=A0A0J8CKX4_BETVU	3e-39	66.39	UniRef100_A7DY56 Tropinone reductase n=1 Tax=Cochlearia officinalis RepID=TRN1_COCOF	2e-37	Bv4_088200_epud.t1 cDNAEvidence=100	1e-42	66.39	AT2G29350.2 | Symbols: SAG13 | senescence-associated gene 13 | chr2:12601036-12601992 FORWARD LENGTH=225	8e-38	57.5	GO:0002213 GO:0007568	defense_response_to_insect aging	GO:0004022 GO:0016491	alcohol_dehydrogenase_(NAD)_activity oxidoreductase_activity	-8.83	-2.09	-0.874	-5.26	-0.608	2.37	0.758	-1.07	2.52	0.164	0.013	0.818	0.93	0.219	0.808	0.709	0.918	1	0.866	0.991
22	27357312	TR37488|c0_g2_i2	Susceptible	1082	AH008187	4	27345697	27351805	UniRef100_A0A0J8CGL8 Uncharacterized protein n=1 Tax=Beta vulgaris subsp. vulgaris RepID=A0A0J8CGL8_BETVU	0	88.33	UniRef100_UPI0005814244 PREDICTED: uncharacterized protein LOC105176701 n=1 Tax=Sesamum indicum RepID=UPI0005814244	0	Bv4_087900_jxwu.t1 cDNAEvidence=100	0	88.33	AT4G27020.1 | Symbols: | unknown protein; FUNCTIONS IN: molecular_function unknown; LOCATED IN: vacuole; BEST Arabidopsis thaliana protein match is: unknown protein (TAIR:AT5G54870.1); Has 1807 Blast hits to 1807 proteins in 277 species: Archae - 0; Bacteria - 0; Metazoa - 736; Fungi - 347; Plants - 385; Viruses - 0; Other Eukaryotes - 339 (source: NCBI BLink). | chr4:13568604-13571381 REVERSE LE…	0	78.06			GO:0003674	molecular_function	-0.0141	-0.202	0.484	0.168	-0.464	-0.451	0.864	0.12	-0.331	-1.1	1	1	0.788	1	0.503	0.837	0.187	1	1	0.027
23	3752896	TR36401|c0_g2_i5	Overlap	1416	AH008651	5	3740931	3747527	UniRef100_A0A0K9RW37 Uncharacterized protein n=1 Tax=Spinacia oleracea RepID=A0A0K9RW37_SPIOL	1e-110	64.39	UniRef100_A0A078ERZ0 BnaC05g16980D protein n=1 Tax=Brassica napus RepID=A0A078ERZ0_BRANA	2e-10	Bv1_010040_qptx.t1 cDNAEvidence=100	7e-97	59.83	AT1G21660.1 | Symbols: | Chaperone DnaJ-domain superfamily protein | chr1:7605924-7608835 FORWARD LENGTH=523	2e-06	80.77					-2.46	-0.445	-0.642	-0.215	-1.16	-2.3	-1.03	0.0201	-0.195	-1.09	0.01	0.985	0.641	1	0.034	0.022	0.065	1	1	0.076
23	3752896	TR35053|c2_g2_i2	Resistant	2336	AH008652	5	3754126	3779185	UniRef100_A0A0J8D1I2 Uncharacterized protein n=1 Tax=Beta vulgaris subsp. vulgaris RepID=A0A0J8D1I2_BETVU	0	74.44	UniRef100_UPI00053F8631 PREDICTED: probable methyltransferase PMT25 isoform X1 n=1 Tax=Beta vulgaris subsp. vulgaris RepID=UPI00053F8631	0	Bv1_010530_prem.t1 cDNAEvidence=100	0	74.44	AT1G29470.2 | Symbols: | S-adenosyl-L-methionine-dependent methyltransferases superfamily protein | chr1:10310424-10313369 REVERSE LENGTH=770	0	57.19					-1.55	-0.223	-0.0769	-0.0664	-1.18	-1.31	-0.418	-0.173	-0.238	-0.481	0.178	1	0.991	1	0.05	0.357	0.775	1	1	0.709
23	3752896	TR12012|c5_g1_i3	Susceptible	2465	AH008650	5	3717372	3727459	UniRef100_A0A0J8D6X4 Uncharacterized protein n=2 Tax=Beta vulgaris subsp. vulgaris RepID=A0A0J8D6X4_BETVU	0	86.2	UniRef100_W9S614 Cadmium/zinc-transporting ATPase 3 n=1 Tax=Morus notabilis RepID=W9S614_9ROSA	0	Bv1_010070_esky.t1 cDNAEvidence=100	0	86.2	AT4G30110.1 | Symbols: HMA2, ATHMA2 | heavy metal atpase 2 | chr4:14720253-14724577 REVERSE LENGTH=951	0	60.29	GO:0055069	zinc_ion_homeostasis	GO:0015434	cadmium-transporting_ATPase_activity	-1.32	-0.257	-0.778	-0.939	0.655	-5.02	-0.996	-1.69	-2.64	0.301	0.646	1	0.856	0.975	0.631	0.008	0.709	0.55	0.061	0.952
23	3752896	TR41558|c2_g1_i1	Susceptible	465	AH008655	5	3799154	3803477	UniRef100_A0A0K9QDB5 Uncharacterized protein n=1 Tax=Spinacia oleracea RepID=A0A0K9QDB5_SPIOL	3e-70	77.94	UniRef100_UPI000511AB90 PREDICTED: protein STAY-GREEN LIKE, chloroplastic-like n=1 Tax=Pyrus x bretschneideri RepID=UPI000511AB90	1e-42	Bv1_010560_fwax.t1 cDNAEvidence=100	1e-68	73.79	AT1G44000.1 | Symbols: | unknown protein; BEST Arabidopsis thaliana protein match is: unknown protein (TAIR:AT4G11911.1); Has 216 Blast hits to 212 proteins in 76 species: Archae - 0; Bacteria - 96; Metazoa - 0; Fungi - 0; Plants - 118; Viruses - 0; Other Eukaryotes - 2 (source: NCBI BLink). | chr1:16708201-16709521 REVERSE LENGTH=260	3e-37	55.65	GO:0009658	chloroplast_organization	GO:0003674	molecular_function	-1.25	-1.22	0.5	0.721	-1.26	-5.62	-1.58	-0.499	-1.77	-1.77	0.753	0.958	0.954	1	0.4	0.016	0.488	1	0.694	0.367
24	5553811	TR33287|c1_g1_i1	Overlap	1905	AH008777	5	5585296	5590102	UniRef100_A0A0K9R1B5 Uncharacterized protein n=1 Tax=Spinacia oleracea RepID=A0A0K9R1B5_SPIOL	0	80.37	UniRef100_UPI0003D7656A PREDICTED: glucan 1,3-beta-glucosidase-like n=1 Tax=Citrus sinensis RepID=UPI0003D7656A	0	Bv1_009580_ogpe.t1 cDNAEvidence=100	0	80.49	No informative hit E<10-6	NA	NA	NA	NA	NA	NA	6.31	1.67	2.71	1.56	0.365	7.36	0.307	2.5	2.57	1.98	0	0.488	0.025	0.484	0.83	0	0.962	0.049	0.018	0.087
24	5553811	TR44762|c0_g8_i1	Resistant	917	AH008771	5	5503964	5505043	UniRef100_A0A0J8D6P5 Uncharacterized protein n=1 Tax=Beta vulgaris subsp. vulgaris RepID=A0A0J8D6P5_BETVU	3e-62	66.39	UniRef100_A0A088FRQ7 DREBb n=1 Tax=Suaeda salsa RepID=A0A088FRQ7_SUASA	7e-60	Bv1_009470_kyxu.t1 cDNAEvidence=60	1e-65	66.39	AT1G78080.1 | Symbols: RAP2.4 | related to AP2 4 | chr1:29364790-29365794 FORWARD LENGTH=334	2e-45	92.63	GO:0006355 GO:0006970 GO:0009409 GO:0009414 GO:0009416 GO:0009611 GO:0009651 GO:0009736 GO:0009873 GO:0010017 GO:0045595 GO:0071472	regulation_of_transcription,_DNA-templated response_to_osmotic_stress response_to_cold response_to_water_deprivation response_to_light_stimulus response_to_wounding response_to_salt_stress cytokinin-activated_signaling_pathway ethylene-activated_signaling_pathway red_or_far-red_light_signaling_pathway regulation_of_cell_differentiation cellular_response_to_salt_stress	GO:0003677 GO:0003700 GO:0005515 GO:0043565	DNA_binding sequence-specific_DNA_binding_transcription_factor_activity protein_binding sequence-specific_DNA_binding	-1.37	0.31	-0.217	-0.228	-1.23	-0.601	-0.173	0.236	-0.287	-0.378	0.057	0.999	0.907	1	0	0.642	0.916	1	1	0.635
24	5553811	TR42790|c2_g2_i8	Resistant	1739	AH008772	5	5535694	5541425	UniRef100_A0A0J8D6D7 Uncharacterized protein n=1 Tax=Beta vulgaris subsp. vulgaris RepID=A0A0J8D6D7_BETVU	0	86.65	UniRef100_A0A061FFD4 Glycosyl hydrolase family protein isoform 3 n=1 Tax=Theobroma cacao RepID=A0A061FFD4_THECC	0	Bv1_009530_rznm.t1 cDNAEvidence=100	0	86.65	AT1G78060.1 | Symbols: | Glycosyl hydrolase family protein | chr1:29349796-29352868 REVERSE LENGTH=767	0	72.2	GO:0010075	regulation_of_meristem_growth	GO:0004553	hydrolase_activity,_hydrolyzing_O-glycosyl_compounds	-1.61	-0.371	-0.143	0.0215	-1.12	-1.27	-0.253	-0.269	-0.157	-0.594	0.141	1	0.973	1	0.048	0.375	0.905	1	1	0.581
24	5553811	TR87565|c2_g1_i2	Resistant	871	AH008775	5	5558804	5561595	UniRef100_A0A0K9R1C7 Uncharacterized protein n=1 Tax=Spinacia oleracea RepID=A0A0K9R1C7_SPIOL	8e-152	92.41	UniRef100_UPI00052EE82F PREDICTED: phosphoglycerate mutase-like n=1 Tax=Nelumbo nucifera RepID=UPI00052EE82F	3e-144	Bv1_009560_coet.t1 cDNAEvidence=100	6e-153	91.52	AT1G22170.1 | Symbols: | Phosphoglycerate mutase family protein | chr1:7826603-7828055 FORWARD LENGTH=334	2e-142	85.52	GO:0008152	metabolic_process	GO:0003824	catalytic_activity	-1.7	0.318	-0.223	-0.212	-1.58	0.315	0.0174	0.32	0.51	-0.532	0.164	1	0.954	1	0.006	0.924	1	1	0.951	0.746
24	5553811	TR33287|c1_g1_i1	Susceptible	1905	AH008777	5	5585296	5590102	UniRef100_A0A0K9R1B5 Uncharacterized protein n=1 Tax=Spinacia oleracea RepID=A0A0K9R1B5_SPIOL	0	80.37	UniRef100_UPI0003D7656A PREDICTED: glucan 1,3-beta-glucosidase-like n=1 Tax=Citrus sinensis RepID=UPI0003D7656A	0	Bv1_009580_ogpe.t1 cDNAEvidence=100	0	80.49	No informative hit E<10-6	NA	NA	NA	NA	NA	NA	6.31	1.67	2.71	1.56	0.365	7.36	0.307	2.5	2.57	1.98	0	0.488	0.025	0.484	0.83	0	0.962	0.049	0.018	0.087
25	24485690	TR5810|c1_g1_i13	Resistant	674	AH009613	5	24500487	24504068	UniRef100_A0A0J8D814 Uncharacterized protein n=1 Tax=Beta vulgaris subsp. vulgaris RepID=A0A0J8D814_BETVU	6e-70	88.89	UniRef100_UPI0005813563 PREDICTED: uncharacterized protein LOC105173284 n=1 Tax=Sesamum indicum RepID=UPI0005813563	5e-57	Bv1_003720_pmrz.t1 cDNAEvidence=88.9	2e-73	88.89	AT1G64185.1 | Symbols: | Lactoylglutathione lyase / glyoxalase I family protein | chr1:23824527-23825152 FORWARD LENGTH=118	6e-55	69.49	GO:0008152	metabolic_process	GO:0003824	catalytic_activity	3.19	0.891	0.829	-0.618	2.09	-0.685	-0.463	-0.295	0.302	-0.229	0.029	0.857	0.667	0.984	0.011	0.851	0.864	1	1	0.963
25	24485690	TR1281|c0_g2_i2	Susceptible	2258	AH009607	5	24444323	24447790	UniRef100_A0A0K9QNP9 Uncharacterized protein n=1 Tax=Spinacia oleracea RepID=A0A0K9QNP9_SPIOL	2e-126	77.75	UniRef100_O49936 Basic leucine zipper protein n=1 Tax=Spinacia oleracea RepID=O49936_SPIOL	4e-126	Bv1_003640_tkfj.t1 cDNAEvidence=100	2e-112	78.47	AT2G46270.1 | Symbols: GBF3 | G-box binding factor 3 | chr2:19000859-19002901 FORWARD LENGTH=382	1e-66	52.46	GO:0000303 GO:0007165 GO:0009410 GO:0009414 GO:0009611 GO:0009651 GO:0009723 GO:0009733 GO:0009737 GO:0009738 GO:0009743 GO:0009753 GO:0009873 GO:0030968 GO:0042538	response_to_superoxide signal_transduction response_to_xenobiotic_stimulus response_to_water_deprivation response_to_wounding response_to_salt_stress response_to_ethylene response_to_auxin response_to_abscisic_acid abscisic_acid-activated_signaling_pathway response_to_carbohydrate response_to_jasmonic_acid ethylene-activated_signaling_pathway endoplasmic_reticulum_unfolded_protein_response hypero…	GO:0003700 GO:0043565	sequence-specific_DNA_binding_transcription_factor_activity sequence-specific_DNA_binding	0.561	0.477	0.219	0.0917	-0.227	0.706	1.1	0.423	-0.37	-0.451	0.748	0.986	0.956	1	0.812	0.732	0.043	1	1	0.747
25	24485690	TR25506|c2_g2_i1	Susceptible	2354	AH009612	5	24492529	24497707	UniRef100_A0A0J8D3K9 Uncharacterized protein n=1 Tax=Beta vulgaris subsp. vulgaris RepID=A0A0J8D3K9_BETVU	0	93.53	UniRef100_A0A0B0N127 BTB/POZ domain-containing POB1-like protein n=1 Tax=Gossypium arboreum RepID=A0A0B0N127_GOSAR	0	Bv1_003710_pzdo.t1 cDNAEvidence=100	0	93.53	AT3G61600.1 | Symbols: ATPOB1, POB1 | POZ/BTB containin G-protein 1 | chr3:22795704-22797953 FORWARD LENGTH=561	0	79.6	GO:0009954 GO:0010114 GO:0010227 GO:0048439	proximal/distal_pattern_formation response_to_red_light floral_organ_abscission flower_morphogenesis	GO:0005515 GO:0042803 GO:0046982	protein_binding protein_homodimerization_activity protein_heterodimerization_activity	0.703	-0.224	0.31	0.068	0.549	1.02	0.233	0.189	-0.0514	0.645	0.302	1	0.737	1	0.065	0.135	0.801	1	1	0.044
25	24485690	TR22639|c1_g2_i1	Susceptible	2062	AH009614	5	24505420	24510288	UniRef100_A0A0J8D7M4 Uncharacterized protein n=1 Tax=Beta vulgaris subsp. vulgaris RepID=A0A0J8D7M4_BETVU	0	78.3	UniRef100_A0A061DTU1 Plasma membrane-like protein isoform 1 n=2 Tax=Theobroma cacao RepID=A0A061DTU1_THECC	4e-141	Bv1_003730_qjtp.t1 cDNAEvidence=100	0	78.3	AT5G41620.1 | Symbols: | FUNCTIONS IN: molecular_function unknown; INVOLVED IN: biological_process unknown; LOCATED IN: chloroplast, plasma membrane; EXPRESSED IN: 9 plant structures; EXPRESSED DURING: 6 growth stages; BEST Arabidopsis thaliana protein match is: intracellular protein transport protein USO1-related (TAIR:AT1G64180.1); Has 30201 Blast hits to 17322 proteins in 780 species: Archae -…	7e-97	38.13	GO:0008150	biological_process	GO:0003674	molecular_function	0.0687	0.233	-0.236	0.0145	0.0575	-1.32	-0.222	0.0126	-0.327	-0.779	0.967	1	0.842	1	0.927	0.014	0.799	1	0.814	0.007
26	666809	TR73410|c2_g1_i2	Overlap	1078	AH009771	6	636384	638351	UniRef100_A0A0J8BUJ1 Uncharacterized protein n=1 Tax=Beta vulgaris subsp. vulgaris RepID=A0A0J8BUJ1_BETVU	9e-92	73.63	UniRef100_O23804 Chitinase n=1 Tax=Chenopodium amaranticolor RepID=O23804_9CARY	4e-87	Bv8_189930_yrxk.t1 cDNAEvidence=100	4e-95	73.63	AT3G54420.1 | Symbols: ATEP3, ATCHITIV, CHIV, EP3 | homolog of carrot EP3-3 chitinase | chr3:20145935-20147034 FORWARD LENGTH=273	6e-76	63.59	GO:0002679 GO:0006865 GO:0009626 GO:0010167 GO:0010200 GO:0010262 GO:0015706 GO:0015824	respiratory_burst_involved_in_defense_response amino_acid_transport plant-type_hypersensitive_response response_to_nitrate response_to_chitin somatic_embryogenesis nitrate_transport proline_transport	GO:0004568	chitinase_activity	11.5	1.87	1.55	5.48	2.63	13.3	2.92	2.36	3.92	4.15	0	0.717	0.669	0.07	0.134	0	0.087	0.55	0.062	0.041
26	666809	TR6089|c1_g3_i12	Resistant	1348	AH009773	6	647395	654249	UniRef100_A0A0J8CHA0 Uncharacterized protein n=1 Tax=Beta vulgaris subsp. vulgaris RepID=A0A0J8CHA0_BETVU	6e-101	87.01	UniRef100_UPI000581751B PREDICTED: protein DEK-like n=2 Tax=Sesamum indicum RepID=UPI000581751B	1e-86	Bv4_090260_jkez.t1 cDNAEvidence=100	2e-104	87.01	AT5G55660.1 | Symbols: | DEK domain-containing chromatin associated protein | chr5:22539375-22543142 FORWARD LENGTH=778	4e-66	67.07					0.1	0.0637	-0.358	-0.734	1.13	-0.108	0.0111	0.421	-0.12	-0.42	0.977	1	0.894	0.7	0.038	0.984	1	1	1	0.811
26	666809	TR27937|c3_g1_i1	Resistant	2896	AH009775	6	671275	673407	UniRef100_A0A0J8CLP2 Uncharacterized protein n=1 Tax=Beta vulgaris subsp. vulgaris RepID=A0A0J8CLP2_BETVU	2e-158	72.89	UniRef100_UPI00046DBFAB PREDICTED: cleavage and polyadenylation specificity factor subunit CG7185 n=1 Tax=Prunus mume RepID=UPI00046DBFAB	1e-118	Bv4_090360_iggd.t1 cDNAEvidence=100	7e-162	72.89	AT5G55670.1 | Symbols: | RNA-binding (RRM/RBD/RNP motifs) family protein | chr5:22544669-22546801 REVERSE LENGTH=710	2e-90	58.24	GO:0008150	biological_process	GO:0003723	RNA_binding	-1.77	-0.0922	-0.269	-0.366	-1.05	-0.474	-0.135	-0.014	-0.158	-0.168	0.018	1	0.878	0.959	0.009	0.766	0.946	1	1	0.917
26	666809	TR25174|c3_g1_i11	Resistant	2188	AH009779	6	712181	719106	UniRef100_A0A0J8CGU6 Uncharacterized protein n=2 Tax=Beta vulgaris subsp. vulgaris RepID=A0A0J8CGU6_BETVU	2e-160	81.59	UniRef100_UPI00052F2BE3 PREDICTED: nudix hydrolase 2-like n=1 Tax=Nelumbo nucifera RepID=UPI00052F2BE3	3e-132	Bv4_090470_sfdi.t1 cDNAEvidence=100	7e-164	81.59	AT4G25434.1 | Symbols: ATNUDT10, NUDT10 | nudix hydrolase homolog 10 | chr4:13004043-13005771 REVERSE LENGTH=277	5e-108	60.08	GO:0008152	metabolic_process	GO:0003824 GO:0047631 GO:0051287	catalytic_activity ADP-ribose_diphosphatase_activity NAD_binding	2	0.536	0.972	0.676	-0.183	1.19	0.502	-0.284	0.808	0.162	0.04	0.791	0.334	0.839	0.773	0.441	0.607	1	0.7	0.933
27	1978839	TR6838|c0_g1_i7	Overlap	1107	AH009856	6	1968577	1969254	UniRef100_A0A0J8CLA2 Uncharacterized protein n=1 Tax=Beta vulgaris subsp. vulgaris RepID=A0A0J8CLA2_BETVU	3e-75	63.51	UniRef100_UPI00052ECC26 PREDICTED: uncharacterized protein LOC104592990 n=1 Tax=Nelumbo nucifera RepID=UPI00052ECC26	7e-43	Bv4_089260_xhgu.t1 cDNAEvidence=100	1e-78	63.51	AT5G40690.1 | Symbols: | CONTAINS InterPro DOMAIN/s: EF-Hand 1, calcium-binding site (InterPro:IPR018247); BEST Arabidopsis thaliana protein match is: unknown protein (TAIR:AT2G41730.1); Has 1807 Blast hits to 1807 proteins in 277 species: Archae - 0; Bacteria - 0; Metazoa - 736; Fungi - 347; Plants - 385; Viruses - 0; Other Eukaryotes - 339 (source: NCBI BLink). | chr5:16290770-16291402 FORWARD …	4e-37	52.5	GO:0008150	biological_process			8.64	2.46	1.67	0.175	4.33	7.6	1.78	2.88	1.11	1.83	0.001	0.553	0.744	1	0.002	0.004	0.602	0.385	0.998	0.515
27	1978839	TR6838|c0_g1_i7	Resistant	1107	AH009856	6	1968577	1969254	UniRef100_A0A0J8CLA2 Uncharacterized protein n=1 Tax=Beta vulgaris subsp. vulgaris RepID=A0A0J8CLA2_BETVU	3e-75	63.51	UniRef100_UPI00052ECC26 PREDICTED: uncharacterized protein LOC104592990 n=1 Tax=Nelumbo nucifera RepID=UPI00052ECC26	7e-43	Bv4_089260_xhgu.t1 cDNAEvidence=100	1e-78	63.51	AT5G40690.1 | Symbols: | CONTAINS InterPro DOMAIN/s: EF-Hand 1, calcium-binding site (InterPro:IPR018247); BEST Arabidopsis thaliana protein match is: unknown protein (TAIR:AT2G41730.1); Has 1807 Blast hits to 1807 proteins in 277 species: Archae - 0; Bacteria - 0; Metazoa - 736; Fungi - 347; Plants - 385; Viruses - 0; Other Eukaryotes - 339 (source: NCBI BLink). | chr5:16290770-16291402 FORWARD …	4e-37	52.5	GO:0008150	biological_process			8.64	2.46	1.67	0.175	4.33	7.6	1.78	2.88	1.11	1.83	0.001	0.553	0.744	1	0.002	0.004	0.602	0.385	0.998	0.515
27	1978839	TR9763|c1_g1_i1	Resistant	1364	AH009858	6	2009623	2015088	UniRef100_A0A0J8CLA7 Uncharacterized protein n=1 Tax=Beta vulgaris subsp. vulgaris RepID=A0A0J8CLA7_BETVU	8e-128	90.73	UniRef100_UPI0005814904 PREDICTED: syntaxin-51-like n=1 Tax=Sesamum indicum RepID=UPI0005814904	9e-107	Bv4_089310_kcsr.t1 cDNAEvidence=100	3e-131	90.73	AT1G79590.2 | Symbols: SYP52, ATSYP52 | syntaxin of plants 52 | chr1:29947064-29948304 FORWARD LENGTH=233	1e-97	69.76	GO:0006623 GO:0016192	protein_targeting_to_vacuole vesicle-mediated_transport	GO:0005484	SNAP_receptor_activity	1.53	0.0984	0.211	0.319	0.906	0.564	0.267	-0.0748	0.148	0.224	0.014	1	0.9	0.952	0.004	0.636	0.795	1	1	0.842
27	1978839	TR6838|c0_g1_i7	Susceptible	1107	AH009856	6	1968577	1969254	UniRef100_A0A0J8CLA2 Uncharacterized protein n=1 Tax=Beta vulgaris subsp. vulgaris RepID=A0A0J8CLA2_BETVU	3e-75	63.51	UniRef100_UPI00052ECC26 PREDICTED: uncharacterized protein LOC104592990 n=1 Tax=Nelumbo nucifera RepID=UPI00052ECC26	7e-43	Bv4_089260_xhgu.t1 cDNAEvidence=100	1e-78	63.51	AT5G40690.1 | Symbols: | CONTAINS InterPro DOMAIN/s: EF-Hand 1, calcium-binding site (InterPro:IPR018247); BEST Arabidopsis thaliana protein match is: unknown protein (TAIR:AT2G41730.1); Has 1807 Blast hits to 1807 proteins in 277 species: Archae - 0; Bacteria - 0; Metazoa - 736; Fungi - 347; Plants - 385; Viruses - 0; Other Eukaryotes - 339 (source: NCBI BLink). | chr5:16290770-16291402 FORWARD …	4e-37	52.5	GO:0008150	biological_process			8.64	2.46	1.67	0.175	4.33	7.6	1.78	2.88	1.11	1.83	0.001	0.553	0.744	1	0.002	0.004	0.602	0.385	0.998	0.515
28	3111198	TR9071|c0_g1_i1	Resistant	1322	AH009915	6	3108572	3109057	No hit E<10-10	NA	NA	No informative hit E<10-10	NA	No informative hit E<10-10	NA	NA	No informative hit E<10-6	NA	NA	NA	NA	NA	NA	1.85	0.513	0.379	-0.468	1.43	1.4	0.0726	0.121	0.327	0.884	0.183	1	0.913	1	0.021	0.482	0.991	1	1	0.414
28	3111198	TR84715|c0_g1_i6	Susceptible	949	AH009914	6	3091209	3091949	No hit E<10-10	NA	NA	No informative hit E<10-10	NA	No informative hit E<10-10	NA	NA	No informative hit E<10-6	NA	NA	NA	NA	NA	NA	2.33	0.561	0.431	0.43	0.912	4.82	0.948	-1.04	2.74	2.18	0.456	1	0.967	1	0.515	0.046	0.8	1	0.076	0.123
28	3111198	TR45878|c4_g2_i2	Susceptible	1294	AH009916	6	3113689	3125795	UniRef100_A0A0J8B4W2 Uncharacterized protein n=1 Tax=Beta vulgaris subsp. vulgaris RepID=A0A0J8B4W2_BETVU	3e-32	52.94	No informative hit E<10-10	NA	Bv_000610_snsi.t1 cDNAEvidence=100	1e-35	52.94	No informative hit E<10-6	NA	NA	NA	NA	NA	NA	1.15	0.155	0.329	-0.0867	0.755	1.48	0.172	0.0839	0.251	0.972	0.185	1	0.835	1	0.062	0.099	0.932	1	1	0.018
28	3111198	TR77300|c4_g1_i1	Susceptible	1383	AH009917	6	3131322	3138021	UniRef100_A0A0J8B8U9 Uncharacterized protein n=1 Tax=Beta vulgaris subsp. vulgaris RepID=A0A0J8B8U9_BETVU	9e-179	75.44	UniRef100_UPI00052ED19F PREDICTED: GDSL esterase/lipase At5g55050-like n=1 Tax=Nelumbo nucifera RepID=UPI00052ED19F	5e-150	Bv_000690_usnw.t1 cDNAEvidence=100	0	75.44	AT5G55050.1 | Symbols: | GDSL-like Lipase/Acylhydrolase superfamily protein | chr5:22337745-22339741 FORWARD LENGTH=376	3e-97	48.27	GO:0015824	proline_transport			1.49	0.323	0.905	-0.178	0.441	2.96	1.26	0.704	0.801	0.203	0.407	1	0.666	1	0.669	0.045	0.211	0.994	0.843	0.953
29	15525318	TR106079|c0_g1_i2	Resistant	1069	AH010442	6	15497488	15506554	UniRef100_A0A0J8FDA4 Uncharacterized protein n=1 Tax=Beta vulgaris subsp. vulgaris RepID=A0A0J8FDA4_BETVU	3e-98	75.25	UniRef100_UPI0003D736B8 PREDICTED: uncharacterized protein LOC102608404 isoform X2 n=1 Tax=Citrus sinensis RepID=UPI0003D736B8	2e-65	Bv4_081690_yrty.t1 cDNAEvidence=100	1e-101	75.25	AT1G54850.1 | Symbols: | HSP20-like chaperones superfamily protein | chr1:20454440-20455994 FORWARD LENGTH=206	5e-59	50.26	GO:0008150 GO:0009408 GO:0009644 GO:0042542	biological_process response_to_heat response_to_high_light_intensity response_to_hydrogen_peroxide	GO:0003674	molecular_function	0.762	-0.0767	0.378	-0.627	1.09	-0.855	-0.217	-0.133	-0.233	-0.272	0.573	1	0.856	0.769	0.034	0.629	0.928	1	1	0.885
29	15525318	TR13487|c2_g2_i3	Resistant	540	AH010445	6	15518040	15518675	UniRef100_A0A0K9RSZ2 Uncharacterized protein n=1 Tax=Spinacia oleracea RepID=A0A0K9RSZ2_SPIOL	8e-51	72.34	UniRef100_U5GAG3 RING zinc finger family protein n=1 Tax=Populus trichocarpa RepID=U5GAG3_POPTR	3e-43	Bv4_081650_ikgp.t2 cDNAEvidence=94.7	7e-47	68.91	AT3G05250.1 | Symbols: | RING/U-box superfamily protein | chr3:1495635-1497387 FORWARD LENGTH=278	3e-36	51.94	GO:0007165 GO:0009755	signal_transduction hormone-mediated_signaling_pathway	GO:0008270	zinc_ion_binding	-2.07	0.124	-0.19	0.39	-2.39	-1.24	-0.874	-0.385	0.0128	0.00626	0.291	1	0.979	1	0.025	0.654	0.562	1	1	1
29	15525318	TR25461|c3_g1_i2	Resistant	1326	AH010447	6	15525733	15529845	UniRef100_A0A0K9RUI2 Uncharacterized protein n=1 Tax=Spinacia oleracea RepID=A0A0K9RUI2_SPIOL	0	84.6	UniRef100_UPI00052F1F04 PREDICTED: amidase 1 isoform X2 n=1 Tax=Nelumbo nucifera RepID=UPI00052F1F04	0	Bv4_081640_nrei.t1 cDNAEvidence=100	0	83.59	AT1G08980.1 | Symbols: ATAMI1, AMI1, ATTOC64-I, TOC64-I | amidase 1 | chr1:2884455-2886430 FORWARD LENGTH=425	9e-177	67.19	GO:0009684 GO:0009965 GO:0019761 GO:0030154 GO:0045893	indoleacetic_acid_biosynthetic_process leaf_morphogenesis glucosinolate_biosynthetic_process cell_differentiation positive_regulation_of_transcription,_DNA-templated	GO:0004040 GO:0016810 GO:0043864	amidase_activity hydrolase_activity,_acting_on_carbon-nitrogen_(but_not_peptide)_bonds indoleacetamide_hydrolase_activity	-2.44	-1.42	0.24	0.549	-1.81	-0.988	0.193	-0.69	0.0403	-0.532	0.116	0.29	0.965	1	0.022	0.73	0.965	0.971	1	0.816
29	15525318	TR33137|c1_g1_i5	Resistant	2009	AH010452	6	15553852	15559580	UniRef100_A0A0K9QGN2 Uncharacterized protein (Fragment) n=1 Tax=Spinacia oleracea RepID=A0A0K9QGN2_SPIOL	3e-151	54.01	UniRef100_UPI00053F5CE1 PREDICTED: uncharacterized protein LOC100259597 isoform X3 n=1 Tax=Vitis vinifera RepID=UPI00053F5CE1	9e-35	Bv4_081590_tafd.t2 cDNAEvidence=100	8e-118	59.82	AT1G54920.1 | Symbols: | unknown protein; FUNCTIONS IN: molecular_function unknown; INVOLVED IN: biological_process unknown; LOCATED IN: membrane; EXPRESSED IN: 23 plant structures; EXPRESSED DURING: 15 growth stages; Has 30201 Blast hits to 17322 proteins in 780 species: Archae - 12; Bacteria - 1396; Metazoa - 17338; Fungi - 3422; Plants - 5037; Viruses - 0; Other Eukaryotes - 2996 (source: NCBI…	8e-14	48.08	GO:0006486 GO:0008150	protein_glycosylation biological_process	GO:0003674	molecular_function	-2.44	-0.464	-0.138	-0.308	-1.53	-0.0647	-0.382	-0.227	0.455	0.0888	0.047	1	0.981	1	0.038	0.997	0.845	1	0.983	0.985
29	15525318	TR8163|c0_g1_i3	Susceptible	2118	AH010448	6	15531479	15536100	UniRef100_A0A0K9RGK8 Uncharacterized protein n=1 Tax=Spinacia oleracea RepID=A0A0K9RGK8_SPIOL	0	78.44	UniRef100_UPI0002C30D27 PREDICTED: mevalonate kinase n=1 Tax=Fragaria vesca subsp. vesca RepID=UPI0002C30D27	4e-166	Bv4_081630_wcks.t1 cDNAEvidence=100	0	81.35	AT5G27450.3 | Symbols: MK | mevalonate kinase | chr5:9691051-9692975 FORWARD LENGTH=378	3e-133	59.84	GO:0000280 GO:0007000	nuclear_division nucleolus_organization	GO:0004496	mevalonate_kinase_activity	-0.674	-0.0981	0.394	0.00384	-0.974	-2.36	0.247	-0.37	-0.0492	-2.19	0.668	1	0.867	1	0.106	0.025	0.918	1	1	0
30	16827099	TR28450|c1_g1_i2	Resistant	1560	AH010551	6	16787342	16791743	UniRef100_A0A0J8BA68 Kinesin-like protein n=1 Tax=Beta vulgaris subsp. vulgaris RepID=A0A0J8BA68_BETVU	2e-74	79.58	UniRef100_A0A0J8BA68 Kinesin-like protein n=1 Tax=Beta vulgaris subsp. vulgaris RepID=A0A0J8BA68_BETVU	2e-74	Bv4_094490_fwtf.t1 cDNAEvidence=97	1e-77	79.58	AT3G63480.2 | Symbols: | ATP binding microtubule motor family protein | chr3:23441065-23443809 REVERSE LENGTH=465	3e-48	58.42	GO:0006261	DNA-dependent_DNA_replication	GO:0003777	microtubule_motor_activity	5.09	1.26	-0.0961	-2.69	6.62	1.56	0.816	1.11	-0.152	-0.208	0.354	1	1	0.82	0.018	0.899	0.944	1	1	0.993
30	16827099	TR1114|c0_g3_i3	Resistant	918	AH010554	6	16809244	16814201	UniRef100_A0A0J8FCL9 Uncharacterized protein n=1 Tax=Beta vulgaris subsp. vulgaris RepID=A0A0J8FCL9_BETVU	8e-87	73.91	UniRef100_UPI00057AF3D8 PREDICTED: uncharacterized protein LOC105124989 n=1 Tax=Populus euphratica RepID=UPI00057AF3D8	8e-73	Bv4_083410_dkdg.t1 cDNAEvidence=100	3e-90	73.91	AT5G27390.1 | Symbols: | Mog1/PsbP/DUF1795-like photosystem II reaction center PsbP family protein | chr5:9674634-9676118 REVERSE LENGTH=241	1e-62	54.19	GO:0009220	pyrimidine_ribonucleotide_biosynthetic_process			-0.393	0.0911	0.171	0.289	-0.945	1.1	0.136	0.56	0.166	0.234	0.733	1	0.944	1	0.009	0.264	0.945	0.639	1	0.853
30	16827099	TR895|c1_g1_i1	Resistant	1689	AH010558	6	16835823	16840333	UniRef100_A0A0K9RGU5 Uncharacterized protein n=1 Tax=Spinacia oleracea RepID=A0A0K9RGU5_SPIOL	4e-169	80.79	UniRef100_W0TSS9 Phosphoglycerate mutase n=1 Tax=Acacia mangium RepID=W0TSS9_ACAMN	4e-145	Bv4_083350_jsxg.t1 cDNAEvidence=100	1e-171	80.73	AT3G05170.1 | Symbols: | Phosphoglycerate mutase family protein | chr3:1466738-1468219 FORWARD LENGTH=316	1e-139	72.39	GO:0008152	metabolic_process	GO:0003824	catalytic_activity	-2.95	-0.804	0.132	0.212	-2.49	-1.69	-0.647	0.271	-0.831	-0.485	0.117	0.969	0.989	1	0.018	0.577	0.808	1	0.964	0.907
30	16827099	TR13546|c0_g2_i2	Resistant	1548	AH010561	6	16875986	16893648	UniRef100_A0A0J8CNG0 Uncharacterized protein n=1 Tax=Beta vulgaris subsp. vulgaris RepID=A0A0J8CNG0_BETVU	4e-120	61.8	UniRef100_UPI00071144C0 PREDICTED: sugar transporter ERD6-like 5 n=1 Tax=Vigna radiata var. radiata RepID=UPI00071144C0	3e-100	Bv4_083290_smzt.t1 cDNAEvidence=100	1e-123	61.8	AT1G54730.2 | Symbols: | Major facilitator superfamily protein | chr1:20424471-20429978 FORWARD LENGTH=470	4e-87	48.25			GO:0005351 GO:0015144	sugar:proton_symporter_activity carbohydrate_transmembrane_transporter_activity	1.76	0.597	-0.124	-0.828	2.12	-0.842	-0.332	0.138	0.0611	-0.71	0.485	1	0.994	1	0.03	0.859	0.95	1	1	0.801
31	17256813	TR30698|c3_g1_i2	Overlap	3657	AH010577	6	17211691	17212863	UniRef100_UPI00053F5470 PREDICTED: putative disease resistance protein RGA4 n=1 Tax=Beta vulgaris subsp. vulgaris RepID=UPI00053F5470	0	43.87	UniRef100_UPI00053F5470 PREDICTED: putative disease resistance protein RGA4 n=1 Tax=Beta vulgaris subsp. vulgaris RepID=UPI00053F5470	0	Bv2_027760_yeti.t1 cDNAEvidence=100	1e-100	29.06	AT3G14470.1 | Symbols: | NB-ARC domain-containing disease resistance protein | chr3:4857940-4861104 FORWARD LENGTH=1054	9e-94	28.65	GO:0006952 GO:0009627 GO:0009697	defense_response systemic_acquired_resistance salicylic_acid_biosynthetic_process	GO:0005515	protein_binding	-8.03	-0.728	0.252	-0.163	-7.39	13.5	3.72	1.16	1.81	6.84	0.169	1	0.996	1	0.045	0.007	0.437	1	1	0.101
31	17256813	TR18101|c0_g1_i2	Overlap	2754	AH010580	6	17260852	17278622	UniRef100_A0A0J8FSV3 Uncharacterized protein n=1 Tax=Beta vulgaris subsp. vulgaris RepID=A0A0J8FSV3_BETVU	0	69.98	UniRef100_UPI00053FF925 PREDICTED: ankyrin repeat-containing protein At3g12360-like isoform X4 n=1 Tax=Beta vulgaris subsp. vulgaris RepID=UPI00053FF925	0	Bv2_029040_jayx.t1 cDNAEvidence=100	0	69.98	AT3G18670.1 | Symbols: | Ankyrin repeat family protein | chr3:6424135-6426471 REVERSE LENGTH=598	1e-96	39.68					-7.41	-0.847	0.547	-1.1	-6.01	11	3.12	1.01	2.44	4.38	0.152	1	0.979	1	0.045	0.021	0.519	1	0.927	0.278
31	17256813	TR18101|c0_g1_i2	Resistant	2754	AH010580	6	17260852	17278622	UniRef100_A0A0J8FSV3 Uncharacterized protein n=1 Tax=Beta vulgaris subsp. vulgaris RepID=A0A0J8FSV3_BETVU	0	69.98	UniRef100_UPI00053FF925 PREDICTED: ankyrin repeat-containing protein At3g12360-like isoform X4 n=1 Tax=Beta vulgaris subsp. vulgaris RepID=UPI00053FF925	0	Bv2_029040_jayx.t1 cDNAEvidence=100	0	69.98	AT3G18670.1 | Symbols: | Ankyrin repeat family protein | chr3:6424135-6426471 REVERSE LENGTH=598	1e-96	39.68					-7.41	-0.847	0.547	-1.1	-6.01	11	3.12	1.01	2.44	4.38	0.152	1	0.979	1	0.045	0.021	0.519	1	0.927	0.278
31	17256813	TR22571|c0_g2_i5	Susceptible	1331	AH010582	6	17293857	17304058	UniRef100_UPI00053F760F PREDICTED: phosphoenolpyruvate/phosphate translocator 2, chloroplastic-like n=1 Tax=Beta vulgaris subsp. vulgaris RepID=UPI00053F760F	0	78.92	UniRef100_UPI00053F760F PREDICTED: phosphoenolpyruvate/phosphate translocator 2, chloroplastic-like n=1 Tax=Beta vulgaris subsp. vulgaris RepID=UPI00053F760F	0	Bv5_117240_yhsk.t1 cDNAEvidence=100	1e-153	63.99	AT3G01550.1 | Symbols: ATPPT2, PPT2 | phosphoenolpyruvate (pep)/phosphate translocator 2 | chr3:216947-218856 REVERSE LENGTH=383	5e-147	67.18	GO:0006863 GO:0009718 GO:0015713 GO:0015714	purine_nucleobase_transport anthocyanin-containing_compound_biosynthetic_process phosphoglycerate_transport phosphoenolpyruvate_transport	GO:0015120 GO:0015121 GO:0015297	phosphoglycerate_transmembrane_transporter_activity phosphoenolpyruvate:phosphate_antiporter_activity antiporter_activity	-0.697	0.267	-0.565	-0.507	0.107	-3.88	-0.152	-1.28	-0.614	-1.84	0.839	1	0.819	1	0.924	0.026	0.967	0.223	1	0.001
32	20767286	TR91336|c1_g1_i1	Overlap	1470	AH010884	6	20747311	20750090	UniRef100_UPI0005401549 PREDICTED: transmembrane protein 45B-like n=1 Tax=Beta vulgaris subsp. vulgaris RepID=UPI0005401549	0	78.88	UniRef100_UPI0005401549 PREDICTED: transmembrane protein 45B-like n=1 Tax=Beta vulgaris subsp. vulgaris RepID=UPI0005401549	0	Bv2_045930_wxwy.t1 cDNAEvidence=40	6e-74	49.08	AT1G55230.1 | Symbols: | Family of unknown function (DUF716) _x0001_| chr1:20602895-20603797 FORWARD LENGTH=300	7e-117	55.7	GO:0008150	biological_process			9.71	5.03	2.99	1.53	0.164	9.83	4.39	2.17	2.19	1.08	0.017	0.002	0.504	1	0.976	0	0.006	0.803	0.626	0.826
32	20767286	TR40292|c5_g1_i4	Resistant	517	AH010883	6	20734537	20740908	UniRef100_A0A0J8CQR9 Uncharacterized protein n=1 Tax=Beta vulgaris subsp. vulgaris RepID=A0A0J8CQR9_BETVU	4e-76	91.8	UniRef100_UPI00053FB89F PREDICTED: uncharacterized protein LOC100250156 n=1 Tax=Vitis vinifera RepID=UPI00053FB89F	1e-74	Bv4_071380_rxdg.t1 cDNAEvidence=100	1e-79	91.8	AT3G32930.1 | Symbols: | unknown protein; FUNCTIONS IN: molecular_function unknown; INVOLVED IN: biological_process unknown; LOCATED IN: chloroplast envelope; EXPRESSED IN: 22 plant structures; EXPRESSED DURING: 13 growth stages; Has 57 Blast hits to 57 proteins in 11 species: Archae - 0; Bacteria - 0; Metazoa - 0; Fungi - 0; Plants - 57; Viruses - 0; Other Eukaryotes - 0 (source: NCBI BLink). | …	4e-73	83.61	GO:0008150	biological_process	GO:0003674	molecular_function	1.52	-1.27	0.253	0.503	2.04	-1.02	-0.455	-0.323	0.0982	-0.343	0.494	0.693	0.971	1	0.022	0.784	0.908	1	1	0.936
32	20767286	TR12403|c5_g1_i1	Resistant	1526	AH010887	6	20779787	20780134	UniRef100_A0A0J8CLI8 Uncharacterized protein n=1 Tax=Beta vulgaris subsp. vulgaris RepID=A0A0J8CLI8_BETVU	1e-47	86.79	UniRef100_UPI00032AC103 PREDICTED: uncharacterized protein LOC101506213 n=1 Tax=Cicer arietinum RepID=UPI00032AC103	1e-30	Bv4_071470_wcqk.t1 cDNAEvidence=100	4e-51	86.79	No informative hit E<10-6	NA	NA	NA	NA	NA	NA	0.966	-0.227	0.0608	-0.143	1.27	-1.21	-0.479	0.0354	-0.396	-0.371	0.534	1	0.996	1	0.038	0.528	0.791	1	1	0.862
32	20767286	TR40418|c1_g1_i2	Resistant	1639	AH010890	6	20807508	20816539	UniRef100_A0A0K9R5W9 Uncharacterized protein n=1 Tax=Spinacia oleracea RepID=A0A0K9R5W9_SPIOL	0	73.24	UniRef100_UPI00052F1739 PREDICTED: uncharacterized protein LOC104597586 n=1 Tax=Nelumbo nucifera RepID=UPI00052F1739	0	Bv4_071510_wmrx.t1 cDNAEvidence=100	0	94.33	AT3G13670.1 | Symbols: | Protein kinase family protein | chr3:4469434-4473234 FORWARD LENGTH=703	0	83.63	GO:0006487	protein_N-linked_glycosylation	GO:0016301	kinase_activity	-1.86	-0.314	-0.525	-0.336	-0.686	-0.624	-0.105	-0.0165	-0.118	-0.385	0.049	1	0.704	1	0.234	0.733	0.972	1	1	0.774
33	21324676	TR10968|c0_g2_i6	Overlap	2206	AH010919	6	21319196	21331759	UniRef100_A0A0J8CQY6 Lipoxygenase n=1 Tax=Beta vulgaris subsp. vulgaris RepID=A0A0J8CQY6_BETVU	0	74.71	UniRef100_A0A0J8CQY6 Lipoxygenase n=1 Tax=Beta vulgaris subsp. vulgaris RepID=A0A0J8CQY6_BETVU	0	Bv4_072070_uwja.t1 cDNAEvidence=100	0	74.71	AT3G45140.1 | Symbols: LOX2, ATLOX2 | lipoxygenase 2 | chr3:16525437-16529233 FORWARD LENGTH=896	0	57.3	GO:0000023 GO:0000096 GO:0006546 GO:0006636 GO:0006733 GO:0006766 GO:0006816 GO:0007030 GO:0008652 GO:0009072 GO:0009106 GO:0009108 GO:0009117 GO:0009269 GO:0009409 GO:0009414 GO:0009416 GO:0009611 GO:0009617 GO:0009620 GO:0009651 GO:0009695 GO:0009737 GO:0009753 GO:0015994 GO:0015995 GO:0016117 GO:0019216 GO:0019252 GO:0019288 GO:0019748 GO:0030003 GO:0031408 GO:0034440 GO:0044272 GO:0051707 GO:…	maltose_metabolic_process sulfur_amino_acid_metabolic_process glycine_catabolic_process unsaturated_fatty_acid_biosynthetic_process oxidoreduction_coenzyme_metabolic_process vitamin_metabolic_process calcium_ion_transport Golgi_organization cellular_amino_acid_biosynthetic_process aromatic_amino_acid_family_metabolic_process lipoate_metabolic_process coenzyme_biosynthetic_process nucleotide_metab…	GO:0005515 GO:0016165	protein_binding linoleate_13S-lipoxygenase_activity	-3.13	-1.03	-0.895	-0.183	-1.02	-2.26	-0.391	-0.834	-0.239	-0.794	0.01	0.579	0.582	1	0.15	0.142	0.879	0.818	1	0.543
33	21324676	TR10968|c0_g2_i6	Resistant	2206	AH010919	6	21319196	21331759	UniRef100_A0A0J8CQY6 Lipoxygenase n=1 Tax=Beta vulgaris subsp. vulgaris RepID=A0A0J8CQY6_BETVU	0	74.71	UniRef100_A0A0J8CQY6 Lipoxygenase n=1 Tax=Beta vulgaris subsp. vulgaris RepID=A0A0J8CQY6_BETVU	0	Bv4_072070_uwja.t1 cDNAEvidence=100	0	74.71	AT3G45140.1 | Symbols: LOX2, ATLOX2 | lipoxygenase 2 | chr3:16525437-16529233 FORWARD LENGTH=896	0	57.3	GO:0000023 GO:0000096 GO:0006546 GO:0006636 GO:0006733 GO:0006766 GO:0006816 GO:0007030 GO:0008652 GO:0009072 GO:0009106 GO:0009108 GO:0009117 GO:0009269 GO:0009409 GO:0009414 GO:0009416 GO:0009611 GO:0009617 GO:0009620 GO:0009651 GO:0009695 GO:0009737 GO:0009753 GO:0015994 GO:0015995 GO:0016117 GO:0019216 GO:0019252 GO:0019288 GO:0019748 GO:0030003 GO:0031408 GO:0034440 GO:0044272 GO:0051707 GO:…	maltose_metabolic_process sulfur_amino_acid_metabolic_process glycine_catabolic_process unsaturated_fatty_acid_biosynthetic_process oxidoreduction_coenzyme_metabolic_process vitamin_metabolic_process calcium_ion_transport Golgi_organization cellular_amino_acid_biosynthetic_process aromatic_amino_acid_family_metabolic_process lipoate_metabolic_process coenzyme_biosynthetic_process nucleotide_metab…	GO:0005515 GO:0016165	protein_binding linoleate_13S-lipoxygenase_activity	-3.13	-1.03	-0.895	-0.183	-1.02	-2.26	-0.391	-0.834	-0.239	-0.794	0.01	0.579	0.582	1	0.15	0.142	0.879	0.818	1	0.543
33	21324676	TR15254|c2_g1_i3	Resistant	1214	AH010920	6	21341114	21346516	UniRef100_A0A0J8CQZ9 Uncharacterized protein n=2 Tax=Beta vulgaris subsp. vulgaris RepID=A0A0J8CQZ9_BETVU	4e-124	91.35	UniRef100_B9RI76 Oxidoreductase, putative n=1 Tax=Ricinus communis RepID=B9RI76_RICCO	7e-96	Bv4_072110_jtdz.t1 cDNAEvidence=96.3	1e-127	91.35	AT3G20790.1 | Symbols: | NAD(P)-binding Rossmann-fold superfamily protein | chr3:7268802-7271099 FORWARD LENGTH=355	1e-91	71.63	GO:0008152	metabolic_process	GO:0016491	oxidoreductase_activity	1.1	-0.151	0.37	-0.415	1.29	0.826	0.465	0.287	-0.0532	0.127	0.437	1	0.885	1	0.022	0.685	0.769	1	1	0.968
33	21324676	TR10968|c0_g2_i6	Susceptible	2206	AH010919	6	21319196	21331759	UniRef100_A0A0J8CQY6 Lipoxygenase n=1 Tax=Beta vulgaris subsp. vulgaris RepID=A0A0J8CQY6_BETVU	0	74.71	UniRef100_A0A0J8CQY6 Lipoxygenase n=1 Tax=Beta vulgaris subsp. vulgaris RepID=A0A0J8CQY6_BETVU	0	Bv4_072070_uwja.t1 cDNAEvidence=100	0	74.71	AT3G45140.1 | Symbols: LOX2, ATLOX2 | lipoxygenase 2 | chr3:16525437-16529233 FORWARD LENGTH=896	0	57.3	GO:0000023 GO:0000096 GO:0006546 GO:0006636 GO:0006733 GO:0006766 GO:0006816 GO:0007030 GO:0008652 GO:0009072 GO:0009106 GO:0009108 GO:0009117 GO:0009269 GO:0009409 GO:0009414 GO:0009416 GO:0009611 GO:0009617 GO:0009620 GO:0009651 GO:0009695 GO:0009737 GO:0009753 GO:0015994 GO:0015995 GO:0016117 GO:0019216 GO:0019252 GO:0019288 GO:0019748 GO:0030003 GO:0031408 GO:0034440 GO:0044272 GO:0051707 GO:…	maltose_metabolic_process sulfur_amino_acid_metabolic_process glycine_catabolic_process unsaturated_fatty_acid_biosynthetic_process oxidoreduction_coenzyme_metabolic_process vitamin_metabolic_process calcium_ion_transport Golgi_organization cellular_amino_acid_biosynthetic_process aromatic_amino_acid_family_metabolic_process lipoate_metabolic_process coenzyme_biosynthetic_process nucleotide_metab…	GO:0005515 GO:0016165	protein_binding linoleate_13S-lipoxygenase_activity	-3.13	-1.03	-0.895	-0.183	-1.02	-2.26	-0.391	-0.834	-0.239	-0.794	0.01	0.579	0.582	1	0.15	0.142	0.879	0.818	1	0.543
34	21860234	TR44714|c0_g1_i2	Overlap	2214	AH010956	6	21840238	21844579	UniRef100_A0A0J8CRF0 Uncharacterized protein n=1 Tax=Beta vulgaris subsp. vulgaris RepID=A0A0J8CRF0_BETVU	0	89.11	UniRef100_UPI00053F9E18 PREDICTED: lysine histidine transporter 2-like isoform X3 n=1 Tax=Beta vulgaris subsp. vulgaris RepID=UPI00053F9E18	0	Bv4_073280_aaao.t1 cDNAEvidence=100	0	89.11	AT5G40780.1 | Symbols: LHT1 | lysine histidine transporter 1 | chr5:16323823-16327082 FORWARD LENGTH=446	0	79.29	GO:0006499 GO:0006612 GO:0006820 GO:0006862 GO:0006865 GO:0006888 GO:0010363 GO:0015696 GO:0015802 GO:0030968 GO:0043069 GO:0043090 GO:0043269 GO:0080167	N-terminal_protein_myristoylation protein_targeting_to_membrane anion_transport nucleotide_transport amino_acid_transport ER_to_Golgi_vesicle-mediated_transport regulation_of_plant-type_hypersensitive_response ammonium_transport basic_amino_acid_transport endoplasmic_reticulum_unfolded_protein_response negative_regulation_of_programmed_cell_death amino_acid_import regulation_of_ion_transport resp…	GO:0015171	amino_acid_transmembrane_transporter_activity	3.89	1.39	0.917	0.862	0.719	3.04	0.184	0.555	1.55	0.758	0.002	0.306	0.595	0.727	0.417	0.018	0.965	1	0.076	0.613
34	21860234	TR9773|c4_g1_i5	Overlap	1578	AH010958	6	21880229	21882340	UniRef100_A0A0J8BI45 Uncharacterized protein n=1 Tax=Beta vulgaris subsp. vulgaris RepID=A0A0J8BI45_BETVU	1e-79	59.07	UniRef100_UPI00053FFC53 PREDICTED: ervatamin-C-like n=1 Tax=Beta vulgaris subsp. vulgaris RepID=UPI00053FFC53	5e-79	Bv1_021250_npfd.t1 cDNAEvidence=20	6e-83	59.07	AT1G29090.1 | Symbols: | Cysteine proteinases superfamily protein | chr1:10163103-10164385 REVERSE LENGTH=355	8e-68	50.45	GO:0006508	proteolysis	GO:0008234	cysteine-type_peptidase_activity	-2.33	0.0939	-0.569	0.674	-2.53	4.3	-0.653	0.202	1.55	3.19	0.403	1	0.93	1	0.031	0.123	0.92	1	0.657	0.005
34	21860234	TR44714|c0_g1_i2	Resistant	2214	AH010956	6	21840238	21844579	UniRef100_A0A0J8CRF0 Uncharacterized protein n=1 Tax=Beta vulgaris subsp. vulgaris RepID=A0A0J8CRF0_BETVU	0	89.11	UniRef100_UPI00053F9E18 PREDICTED: lysine histidine transporter 2-like isoform X3 n=1 Tax=Beta vulgaris subsp. vulgaris RepID=UPI00053F9E18	0	Bv4_073280_aaao.t1 cDNAEvidence=100	0	89.11	AT5G40780.1 | Symbols: LHT1 | lysine histidine transporter 1 | chr5:16323823-16327082 FORWARD LENGTH=446	0	79.29	GO:0006499 GO:0006612 GO:0006820 GO:0006862 GO:0006865 GO:0006888 GO:0010363 GO:0015696 GO:0015802 GO:0030968 GO:0043069 GO:0043090 GO:0043269 GO:0080167	N-terminal_protein_myristoylation protein_targeting_to_membrane anion_transport nucleotide_transport amino_acid_transport ER_to_Golgi_vesicle-mediated_transport regulation_of_plant-type_hypersensitive_response ammonium_transport basic_amino_acid_transport endoplasmic_reticulum_unfolded_protein_response negative_regulation_of_programmed_cell_death amino_acid_import regulation_of_ion_transport resp…	GO:0015171	amino_acid_transmembrane_transporter_activity	3.89	1.39	0.917	0.862	0.719	3.04	0.184	0.555	1.55	0.758	0.002	0.306	0.595	0.727	0.417	0.018	0.965	1	0.076	0.613
34	21860234	TR9773|c4_g1_i5	Susceptible	1578	AH010958	6	21880229	21882340	UniRef100_A0A0J8BI45 Uncharacterized protein n=1 Tax=Beta vulgaris subsp. vulgaris RepID=A0A0J8BI45_BETVU	1e-79	59.07	UniRef100_UPI00053FFC53 PREDICTED: ervatamin-C-like n=1 Tax=Beta vulgaris subsp. vulgaris RepID=UPI00053FFC53	5e-79	Bv1_021250_npfd.t1 cDNAEvidence=20	6e-83	59.07	AT1G29090.1 | Symbols: | Cysteine proteinases superfamily protein | chr1:10163103-10164385 REVERSE LENGTH=355	8e-68	50.45	GO:0006508	proteolysis	GO:0008234	cysteine-type_peptidase_activity	-2.33	0.0939	-0.569	0.674	-2.53	4.3	-0.653	0.202	1.55	3.19	0.403	1	0.93	1	0.031	0.123	0.92	1	0.657	0.005
35	15222767	TR9925|c0_g1_i5	Resistant	1294	AH011688	7	14221160	14224717	UniRef100_A0A0J8CP16 Uncharacterized protein n=1 Tax=Beta vulgaris subsp. vulgaris RepID=A0A0J8CP16_BETVU	6e-132	70.4	UniRef100_UPI00057A73B2 PREDICTED: thioredoxin-like 1-1, chloroplastic isoform X1 n=1 Tax=Populus euphratica RepID=UPI00057A73B2	4e-106	Bv3_058440_toia.t1 cDNAEvidence=81.8	2e-135	70.4	AT1G08570.2 | Symbols: ACHT4 | atypical CYS HIS rich thioredoxin 4 | chr1:2713059-2714312 FORWARD LENGTH=244	4e-102	62.99			GO:0016671	oxidoreductase_activity,_acting_on_a_sulfur_group_of_donors,_disulfide_as_acceptor	2.43	-0.376	0.241	1.76	0.81	2.6	0.56	0.348	0.259	1.44	0.026	1	0.949	0.007	0.184	0.015	0.702	1	1	0.009
35	18990028	TR23661|c3_g1_i4	Susceptible	1869	AH011976	7	18997747	19006753	UniRef100_A0A0J8CVD3 Starch synthase, chloroplastic/amyloplastic n=1 Tax=Beta vulgaris subsp. vulgaris RepID=A0A0J8CVD3_BETVU	0	71.37	UniRef100_A0A0J8CVD3 Starch synthase, chloroplastic/amyloplastic n=1 Tax=Beta vulgaris subsp. vulgaris RepID=A0A0J8CVD3_BETVU	0	Bv3_051810_ukzq.t1 cDNAEvidence=97	0	71.37	AT5G24300.2 | Symbols: SSI1 | Glycogen/starch synthases, ADP-glucose type | chr5:8266934-8270860 FORWARD LENGTH=652	1e-163	61.25	GO:0000023 GO:0001666 GO:0010021 GO:0019252 GO:0019375 GO:0043085	maltose_metabolic_process response_to_hypoxia amylopectin_biosynthetic_process starch_biosynthetic_process galactolipid_biosynthetic_process positive_regulation_of_catalytic_activity	GO:0009011 GO:0016757	starch_synthase_activity transferase_activity,_transferring_glycosyl_groups	-1	0.0734	-0.316	0.47	-1.23	0.0603	-0.0742	0.0455	0.0935	-0.00457	0.459	1	0.912	0.988	0.022	0.997	0.987	1	1	1
35	18990028	TR24555|c2_g1_i3	Susceptible	1119	AH011973	7	18982063	18984923	UniRef100_A0A0K9QX38 Uncharacterized protein n=1 Tax=Spinacia oleracea RepID=A0A0K9QX38_SPIOL	7e-11	96.05	No informative hit E<10-10	NA	Bv5_116820_gfja.t1 cDNAEvidence=100	2e-12	92.11	No informative hit E<10-6	NA	NA	NA	NA	NA	NA	0.28	-0.386	0.516	-0.0645	0.214	1.33	0.129	-0.096	1.23	0.0694	0.851	0.991	0.666	1	0.729	0.221	0.96	1	0.009	0.98
35	18990028	TR12119|c0_g1_i2	Susceptible	719	AH011974	7	18986328	18992151	UniRef100_A0A0J8CQZ2 Uncharacterized protein n=1 Tax=Beta vulgaris subsp. vulgaris RepID=A0A0J8CQZ2_BETVU	6e-42	85.71	UniRef100_A0A061G149 2A phosphatase associated protein of 46 kD n=1 Tax=Theobroma cacao RepID=A0A061G149_THECC	7e-37	Bv3_051790_khua.t1 cDNAEvidence=100	2e-45	85.71	AT5G53000.1 | Symbols: TAP46 | 2A phosphatase associated protein of 46 kD | chr5:21485654-21487869 REVERSE LENGTH=405	7e-33	67.59	GO:0009407 GO:0009409	toxin_catabolic_process response_to_cold	GO:0008601	protein_phosphatase_type_2A_regulator_activity	0.568	0.902	-0.0953	-0.722	0.484	-5.33	-0.585	0.254	-4.05	-0.948	0.925	1	1	1	0.831	0.088	0.935	1	0.031	0.832
36	18990028	TR17233|c1_g1_i3	Overlap	2057	AH011975	7	18993973	18994779	UniRef100_A0A0J8CVL3 Uncharacterized protein n=1 Tax=Beta vulgaris subsp. vulgaris RepID=A0A0J8CVL3_BETVU	6e-96	71.06	UniRef100_UPI000520FC0F PREDICTED: probable VAMP-like protein At1g33475 n=1 Tax=Nicotiana sylvestris RepID=UPI000520FC0F	4e-39	Bv3_051800_ysmk.t1 cDNAEvidence=100	2e-99	71.06	AT5G52990.1 | Symbols: | SNARE-like superfamily protein | chr5:21484188-21485006 FORWARD LENGTH=272	7e-32	31.52					-0.132	-0.00182	-0.0204	-0.109	-0.000365	-2.99	-0.296	-0.707	-0.813	-1.18	0.954	1	1	1	1	0	0.861	0.645	0.361	0.021
36	19444178	TR30551|c2_g1_i2	Resistant	2194	AH012003	7	19443826	19449259	UniRef100_A0A0J8CR42 Uncharacterized protein n=1 Tax=Beta vulgaris subsp. vulgaris RepID=A0A0J8CR42_BETVU	8e-100	77.36	UniRef100_UPI00057A0CFA PREDICTED: probable plastid-lipid-associated protein 14, chloroplastic isoform X1 n=1 Tax=Populus euphratica RepID=UPI00057A0CFA	2e-77	Bv3_052110_ddxz.t1 cDNAEvidence=100	3e-103	77.36	AT5G53450.2 | Symbols: ORG1 | OBP3-responsive gene 1 | chr5:21689444-21692242 FORWARD LENGTH=590	3e-68	58.77			GO:0016301	kinase_activity	-3.24	-0.548	-1.08	-1.14	-0.468	-4.03	-0.267	-1.81	-1.01	-0.941	0.032	1	0.566	0.632	0.658	0.004	0.949	0.12	0.764	0.549
36	19444178	TR20166|c0_g1_i2	Resistant	2744	AH012002	7	19431741	19442716	UniRef100_A0A0J8FJI4 Uncharacterized protein n=1 Tax=Beta vulgaris subsp. vulgaris RepID=A0A0J8FJI4_BETVU	6e-113	73.27	UniRef100_UPI00046DC104 PREDICTED: dentin sialophosphoprotein n=1 Tax=Prunus mume RepID=UPI00046DC104	4e-43	Bv3_052100_qpwu.t1 cDNAEvidence=100	2e-116	73.27	AT5G53440.1 | Symbols: | unknown protein; FUNCTIONS IN: molecular_function unknown; INVOLVED IN: biological_process unknown; LOCATED IN: cytosol; EXPRESSED IN: 25 plant structures; EXPRESSED DURING: 15 growth stages; Has 1807 Blast hits to 1807 proteins in 277 species: Archae - 0; Bacteria - 0; Metazoa - 736; Fungi - 347; Plants - 385; Viruses - 0; Other Eukaryotes - 339 (source: NCBI BLink). | c…	4e-19	36.31	GO:0000226 GO:0000911 GO:0006635 GO:0008150 GO:0009630 GO:0016558	microtubule_cytoskeleton_organization cytokinesis_by_cell_plate_formation fatty_acid_beta-oxidation biological_process gravitropism protein_import_into_peroxisome_matrix	GO:0003674	molecular_function	-2.19	-0.272	-0.698	0.074	-1.29	-1.15	-0.364	0.155	-0.28	-0.661	0.06	1	0.662	1	0.036	0.524	0.855	1	1	0.572
36	19444178	TR30551|c2_g1_i2	Resistant	2194	AH012003	7	19443826	19449259	UniRef100_A0A0J8CR42 Uncharacterized protein n=1 Tax=Beta vulgaris subsp. vulgaris RepID=A0A0J8CR42_BETVU	8e-100	77.36	UniRef100_UPI00057A0CFA PREDICTED: probable plastid-lipid-associated protein 14, chloroplastic isoform X1 n=1 Tax=Populus euphratica RepID=UPI00057A0CFA	2e-77	Bv3_052110_ddxz.t1 cDNAEvidence=100	3e-103	77.36	AT5G53450.2 | Symbols: ORG1 | OBP3-responsive gene 1 | chr5:21689444-21692242 FORWARD LENGTH=590	3e-68	58.77			GO:0016301	kinase_activity	-3.24	-0.548	-1.08	-1.14	-0.468	-4.03	-0.267	-1.81	-1.01	-0.941	0.032	1	0.566	0.632	0.658	0.004	0.949	0.12	0.764	0.549
36	19444178	TR12723|c1_g1_i3	Susceptible	2007	AH012004	7	19457671	19459525	UniRef100_A0A0J8BZ97 Uncharacterized protein n=2 Tax=Beta vulgaris subsp. vulgaris RepID=A0A0J8BZ97_BETVU	0	88.25	UniRef100_B9H0C6 Nonsense-mediated mRNA decay NMD3 family protein n=1 Tax=Populus trichocarpa RepID=B9H0C6_POPTR	0	Bv7_174740_fszz.t1 cDNAEvidence=100	0	88.25	AT2G03820.1 | Symbols: | nonsense-mediated mRNA decay NMD3 family protein | chr2:1165149-1166699 REVERSE LENGTH=516	0	66	GO:0000184 GO:0006611 GO:0007029 GO:0009834	nuclear-transcribed_mRNA_catabolic_process,_nonsense-mediated_decay protein_export_from_nucleus endoplasmic_reticulum_organization plant-type_secondary_cell_wall_biogenesis	GO:0003674	molecular_function	-2.34	-0.888	-0.244	-0.382	-0.826	-0.648	-0.389	0.153	-0.0917	-0.32	0.007	0.289	0.926	1	0.123	0.72	0.768	1	1	0.846
37	22061965	TR30551|c2_g1_i2	Overlap	2194	AH012003	7	19443826	19449259	UniRef100_A0A0J8CR42 Uncharacterized protein n=1 Tax=Beta vulgaris subsp. vulgaris RepID=A0A0J8CR42_BETVU	8e-100	77.36	UniRef100_UPI00057A0CFA PREDICTED: probable plastid-lipid-associated protein 14, chloroplastic isoform X1 n=1 Tax=Populus euphratica RepID=UPI00057A0CFA	2e-77	Bv3_052110_ddxz.t1 cDNAEvidence=100	3e-103	77.36	AT5G53450.2 | Symbols: ORG1 | OBP3-responsive gene 1 | chr5:21689444-21692242 FORWARD LENGTH=590	3e-68	58.77			GO:0016301	kinase_activity	-3.24	-0.548	-1.08	-1.14	-0.468	-4.03	-0.267	-1.81	-1.01	-0.941	0.032	1	0.566	0.632	0.658	0.004	0.949	0.12	0.764	0.549
37	22061965	TR37481|c3_g2_i11	Resistant	1669	AH012231	7	22081184	22087674	UniRef100_A0A0J8BBW6 Trehalose 6-phosphate phosphatase n=1 Tax=Beta vulgaris subsp. vulgaris RepID=A0A0J8BBW6_BETVU	0	88.05	UniRef100_A0A0J8BBW6 Trehalose 6-phosphate phosphatase n=1 Tax=Beta vulgaris subsp. vulgaris RepID=A0A0J8BBW6_BETVU	0	Bv3_067590_npqs.t1 cDNAEvidence=100	0	88.05	AT5G51460.2 | Symbols: ATTPPA | Haloacid dehalogenase-like hydrolase (HAD) superfamily protein | chr5:20902266-20904292 FORWARD LENGTH=384	1e-140	64.35	GO:0005992	trehalose_biosynthetic_process	GO:0004805	trehalose-phosphatase_activity	-3.07	-0.37	-0.549	-1.09	-1.07	-2.12	-0.9	-0.247	-0.79	-0.183	0.006	1	0.801	0.458	0.092	0.14	0.348	1	0.815	0.949
37	22061965	TR12520|c1_g2_i3	Resistant	1189	AH012225	7	22025683	22027026	UniRef100_A0A0J8CVB4 Uncharacterized protein n=2 Tax=Beta vulgaris subsp. vulgaris RepID=A0A0J8CVB4_BETVU	5e-75	71.43	UniRef100_UPI000581683F PREDICTED: 21 kDa protein n=1 Tax=Sesamum indicum RepID=UPI000581683F	2e-61	Bv3_056000_nmrx.t1 cDNAEvidence=100	2e-78	71.43	AT5G62360.1 | Symbols: | Plant invertase/pectin methylesterase inhibitor superfamily protein | chr5:25040699-25041310 FORWARD LENGTH=203	5e-54	50.51			GO:0046910	pectinesterase_inhibitor_activity	-4.16	-1.28	-0.127	-0.353	-2.4	0.882	-0.461	0.225	-0.848	1.97	0.026	0.741	0.987	1	0.096	0.817	0.912	1	0.793	0.158
37	22061965	TR30643|c1_g1_i5	Resistant	1244	AH012230	7	22059807	22069289	UniRef100_A0A0J8CVC3 Uncharacterized protein n=1 Tax=Beta vulgaris subsp. vulgaris RepID=A0A0J8CVC3_BETVU	2e-163	71.06	UniRef100_A9LST6 Soluble acid invertase n=2 Tax=Cucumis melo RepID=A9LST6_CUCME	8e-132	Bv3_056080_iafj.t1 cDNAEvidence=93.3	6e-167	71.06	AT1G62660.1 | Symbols: | Glycosyl hydrolases family 32 protein | chr1:23199949-23203515 FORWARD LENGTH=648	3e-119	67.28	GO:0006598 GO:0006816 GO:0006826 GO:0007030 GO:0009611 GO:0009617 GO:0009651 GO:0009698 GO:0009805 GO:0010106 GO:0010167 GO:0015706 GO:0016132 GO:0042398 GO:0071370	polyamine_catabolic_process calcium_ion_transport iron_ion_transport Golgi_organization response_to_wounding response_to_bacterium response_to_salt_stress phenylpropanoid_metabolic_process coumarin_biosynthetic_process cellular_response_to_iron_ion_starvation response_to_nitrate nitrate_transport brassinosteroid_biosynthetic_process cellular_modified_amino_acid_biosynthetic_process cellular_respo…	GO:0004553	hydrolase_activity,_hydrolyzing_O-glycosyl_compounds	-3.41	-0.47	-0.739	0.195	-2.4	-0.0459	-0.036	0.1	-0.089	-0.0211	0.081	1	0.859	1	0.011	1	0.998	1	1	1
38	5934743	TR37481|c3_g2_i11	Resistant	1669	AH012231	8	22081184	22087674	UniRef100_A0A0J8BBW6 Trehalose 6-phosphate phosphatase n=1 Tax=Beta vulgaris subsp. vulgaris RepID=A0A0J8BBW6_BETVU	0	88.05	UniRef100_A0A0J8BBW6 Trehalose 6-phosphate phosphatase n=1 Tax=Beta vulgaris subsp. vulgaris RepID=A0A0J8BBW6_BETVU	0	Bv3_067590_npqs.t1 cDNAEvidence=100	0	88.05	AT5G51460.2 | Symbols: ATTPPA | Haloacid dehalogenase-like hydrolase (HAD) superfamily protein | chr5:20902266-20904292 FORWARD LENGTH=384	1e-140	64.35	GO:0005992	trehalose_biosynthetic_process	GO:0004805	trehalose-phosphatase_activity	-3.07	-0.37	-0.549	-1.09	-1.07	-2.12	-0.9	-0.247	-0.79	-0.183	0.006	1	0.801	0.458	0.092	0.14	0.348	1	0.815	0.949
38	5934743	TR43529|c0_g1_i4	Resistant	1942	AH013046	8	5884044	5889439	UniRef100_A0A0J8BGC2 Uncharacterized protein n=1 Tax=Beta vulgaris subsp. vulgaris RepID=A0A0J8BGC2_BETVU	5e-78	80.34	UniRef100_UPI0004987798 PREDICTED: protein phosphatase inhibitor 2 isoform X1 n=1 Tax=Malus domestica RepID=UPI0004987798	4e-51	Bv3_066810_quon.t1 cDNAEvidence=76.9	2e-81	80.34	AT5G52200.1 | Symbols: | phosphoprotein phosphatase inhibitors | chr5:21202818-21204719 REVERSE LENGTH=191	3e-34	53.68	GO:0080163	regulation_of_protein_serine/threonine_phosphatase_activity	GO:0004864	protein_phosphatase_inhibitor_activity	1.2	0.457	0.0666	-0.193	0.869	-0.0967	-0.0265	-0.296	-0.0782	0.304	0.213	0.944	0.991	1	0.04	0.981	0.997	1	1	0.826
38	5934743	TR2797|c1_g1_i1	Susceptible	1908	AH013052	8	5963962	5967383	UniRef100_A0A0J8CKS4 Uncharacterized protein n=1 Tax=Beta vulgaris subsp. vulgaris RepID=A0A0J8CKS4_BETVU	0	81.41	UniRef100_UPI00023B2AD3 PREDICTED: probable LRR receptor-like serine/threonine-protein kinase At4g26540 n=1 Tax=Vitis vinifera RepID=UPI00023B2AD3	0	Bv4_090980_ghkj.t1 cDNAEvidence=100	0	81.41	AT5G56040.1 | Symbols: | Leucine-rich receptor-like protein kinase family protein | chr5:22695050-22697911 FORWARD LENGTH=953	0	67.02	GO:0002237 GO:0006084 GO:0006468 GO:0007165 GO:0007169 GO:0010075 GO:0010103 GO:0016126 GO:0016132 GO:0048443 GO:0048653	response_to_molecule_of_bacterial_origin acetyl-CoA_metabolic_process protein_phosphorylation signal_transduction transmembrane_receptor_protein_tyrosine_kinase_signaling_pathway regulation_of_meristem_growth stomatal_complex_morphogenesis sterol_biosynthetic_process brassinosteroid_biosynthetic_process stamen_development anther_development	GO:0004674 GO:0005524 GO:0016301	protein_serine/threonine_kinase_activity ATP_binding kinase_activity	-2.88	-0.0173	-0.729	-0.499	-1.64	-2.37	-0.767	-0.0872	-0.541	-0.972	0.073	1	0.796	1	0.044	0.247	0.708	1	1	0.531
38	5934743	TR44929|c4_g1_i6	Susceptible	1217	AH013049	8	5927004	5930872	UniRef100_UPI0005402DEF PREDICTED: alcohol dehydrogenase 2-like isoform X2 n=1 Tax=Beta vulgaris subsp. vulgaris RepID=UPI0005402DEF	0	86.88	UniRef100_UPI0005402DEF PREDICTED: alcohol dehydrogenase 2-like isoform X2 n=1 Tax=Beta vulgaris subsp. vulgaris RepID=UPI0005402DEF	0	Bv7_167240_pyex.t1 cDNAEvidence=95.7	0	86.88	AT1G77120.1 | Symbols: ADH1, ADH, ATADH, ATADH1 | alcohol dehydrogenase 1 | chr1:28975509-28977216 FORWARD LENGTH=379	1e-151	71.05	GO:0001666 GO:0006970 GO:0009651 GO:0009862 GO:0010310 GO:0045333 GO:0046686	response_to_hypoxia response_to_osmotic_stress response_to_salt_stress systemic_acquired_resistance,_salicylic_acid_mediated_signaling_pathway regulation_of_hydrogen_peroxide_metabolic_process cellular_respiration response_to_cadmium_ion	GO:0004022	alcohol_dehydrogenase_(NAD)_activity	-0.79	0.00295	-0.0764	0.0807	-0.797	-2.64	-0.708	-0.443	-0.633	-0.85	0.533	1	0.99	1	0.151	0.001	0.356	0.984	0.701	0.205
39	18990028	TR2797|c1_g1_i1	Resistant	1908	AH013052	8	5963962	5967383	UniRef100_A0A0J8CKS4 Uncharacterized protein n=1 Tax=Beta vulgaris subsp. vulgaris RepID=A0A0J8CKS4_BETVU	0	81.41	UniRef100_UPI00023B2AD3 PREDICTED: probable LRR receptor-like serine/threonine-protein kinase At4g26540 n=1 Tax=Vitis vinifera RepID=UPI00023B2AD3	0	Bv4_090980_ghkj.t1 cDNAEvidence=100	0	81.41	AT5G56040.1 | Symbols: | Leucine-rich receptor-like protein kinase family protein | chr5:22695050-22697911 FORWARD LENGTH=953	0	67.02	GO:0002237 GO:0006084 GO:0006468 GO:0007165 GO:0007169 GO:0010075 GO:0010103 GO:0016126 GO:0016132 GO:0048443 GO:0048653	response_to_molecule_of_bacterial_origin acetyl-CoA_metabolic_process protein_phosphorylation signal_transduction transmembrane_receptor_protein_tyrosine_kinase_signaling_pathway regulation_of_meristem_growth stomatal_complex_morphogenesis sterol_biosynthetic_process brassinosteroid_biosynthetic_process stamen_development anther_development	GO:0004674 GO:0005524 GO:0016301	protein_serine/threonine_kinase_activity ATP_binding kinase_activity	-2.88	-0.0173	-0.729	-0.499	-1.64	-2.37	-0.767	-0.0872	-0.541	-0.972	0.073	1	0.796	1	0.044	0.247	0.708	1	1	0.531
39	18990028	TR54420|c0_g1_i3	Resistant	716	AH013445	8	10618421	10623159	UniRef100_U5FFP2 Uncharacterized protein n=1 Tax=Populus trichocarpa RepID=U5FFP2_POPTR	6e-171	100	UniRef100_UPI00051B104E PREDICTED: 26S protease regulatory subunit 7 homolog A n=1 Tax=Nicotiana tomentosiformis RepID=UPI00051B104E	2e-170	Bv7_168970_fipt.t1 cDNAEvidence=100	2e-173	99.58	AT1G53750.1 | Symbols: RPT1A | regulatory particle triple-A 1A | chr1:20065921-20068324 REVERSE LENGTH=426	3e-173	100	GO:0006511	ubiquitin-dependent_protein_catabolic_process	GO:0016887	ATPase_activity	-0.936	0.027	-0.0574	0.0562	-0.962	-0.126	-0.12	0.0943	-0.156	0.0554	0.259	1	0.99	1	0.009	0.959	0.951	1	1	0.981
39	18990028	TR27187|c1_g1_i3	Resistant	621	AH013448	8	10650742	10653857	UniRef100_A0A0J8BT38 Uncharacterized protein n=1 Tax=Beta vulgaris subsp. vulgaris RepID=A0A0J8BT38_BETVU	5e-68	66.15	UniRef100_UPI00064DC658 PREDICTED: uncharacterized protein LOC105955970 n=1 Tax=Erythranthe guttata RepID=UPI00064DC658	1e-45	Bv7_168920_tdft.t1 cDNAEvidence=100	2e-71	66.15	AT3G14360.1 | Symbols: | alpha/beta-Hydrolases superfamily protein | chr3:4791596-4793534 FORWARD LENGTH=518	8e-40	42.64	GO:0006629	lipid_metabolic_process	GO:0004806	triglyceride_lipase_activity	-12.8	-4.25	-0.853	-1.94	-5.74	-1.12	-0.136	0.852	-1.26	-0.573	0.007	0.439	0.954	0.983	0.105	0.942	0.997	1	1	0.969
39	18990028	TR18140|c0_g2_i1	Resistant	887	AH013451	8	10667092	10667598	UniRef100_A0A0J8BT33 Uncharacterized protein n=1 Tax=Beta vulgaris subsp. vulgaris RepID=A0A0J8BT33_BETVU	2e-67	68.86	UniRef100_UPI0005205037 PREDICTED: PRA1 family protein D n=1 Tax=Nicotiana sylvestris RepID=UPI0005205037	1e-27	Bv7_168870_cizj.t1 cDNAEvidence=100	7e-71	68.86	AT1G04260.1 | Symbols: MPI7, MPIP7, PRA1.D | CAMV movement protein interacting protein 7 | chr1:1140749-1141297 REVERSE LENGTH=182	6e-26	40.13	GO:0006869 GO:0006891 GO:0010351 GO:0016192 GO:0016558 GO:0046739	lipid_transport intra-Golgi_vesicle-mediated_transport lithium_ion_transport vesicle-mediated_transport protein_import_into_peroxisome_matrix transport_of_virus_in_multicellular_host	GO:0005515	protein_binding	8.1	2.16	2.91	1.1	1.93	0.0253	0.0671	0.517	-2.45	1.9	0.001	0.555	0.208	1	0.193	1	0.997	1	0.324	0.395
40	14994380	TR34339|c1_g2_i6	Overlap	2101	AH013452	9	10668968	10670471	UniRef100_A0A0K9QCI7 Uncharacterized protein n=1 Tax=Spinacia oleracea RepID=A0A0K9QCI7_SPIOL	0	73.85	UniRef100_UPI0005813D78 PREDICTED: uncharacterized protein LOC105169880 n=1 Tax=Sesamum indicum RepID=UPI0005813D78	0	Bv9_223650_jpaf.t1 cDNAEvidence=100	0	74.13	AT2G15020.1 | Symbols: | unknown protein; BEST Arabidopsis thaliana protein match is: unknown protein (TAIR:AT5G64190.1); Has 72 Blast hits to 72 proteins in 10 species: Archae - 0; Bacteria - 0; Metazoa - 0; Fungi - 0; Plants - 72; Viruses - 0; Other Eukaryotes - 0 (source: NCBI BLink). | chr2:6491706-6493286 REVERSE LENGTH=526	3e-168	47.04	GO:0008150 GO:0010264	biological_process myo-inositol_hexakisphosphate_biosynthetic_process	GO:0003674	molecular_function	9.73	1.32	2.74	0	5.67	5.3	2.44	2.36	1.61	-1.11	1	1	0.656	1	0.048	0.428	0.363	0.807	1	0.856
40	14994380	TR30418|c3_g1_i4	Resistant	1517	AH014596	9	15022738	15026825	UniRef100_A0A0J8BUC2 Uncharacterized protein n=2 Tax=Beta vulgaris subsp. vulgaris RepID=A0A0J8BUC2_BETVU	0	88.34	UniRef100_UPI000520D1D7 PREDICTED: glutathione S-transferase omega-like 2 isoform X1 n=2 Tax=Nicotiana sylvestris RepID=UPI000520D1D7	0	Bv8_192540_jktu.t2 cDNAEvidence=86.7	0	88.34	AT4G19880.1 | Symbols: | Glutathione S-transferase family protein | chr4:10784691-10786376 REVERSE LENGTH=356	0	77.58	GO:0046686	response_to_cadmium_ion			1.7	0.822	0.818	-0.246	0.307	2.78	1.06	0.705	0.585	0.439	0.122	0.523	0.425	1	0.705	0.004	0.128	0.738	0.856	0.797
40	14994380	TR25410|c1_g1_i1	Susceptible	2842	AH014592	9	14978770	14988763	UniRef100_UPI00053F6636 PREDICTED: tubulin--tyrosine ligase-like protein 12 isoform X1 n=1 Tax=Beta vulgaris subsp. vulgaris RepID=UPI00053F6636	0	84.44	UniRef100_UPI00053F6636 PREDICTED: tubulin--tyrosine ligase-like protein 12 isoform X1 n=1 Tax=Beta vulgaris subsp. vulgaris RepID=UPI00053F6636	0	Bv_001310_nzto.t1 cDNAEvidence=100	0	84.32	AT1G77550.1 | Symbols: | tubulin-tyrosine ligases;tubulin-tyrosine ligases | chr1:29138490-29142965 REVERSE LENGTH=855	0	65.74	GO:0006464 GO:0042991	cellular_protein_modification_process transcription_factor_import_into_nucleus	GO:0004835	tubulin-tyrosine_ligase_activity	1.71	0.615	-0.0576	0.201	0.947	-0.768	-0.572	-0.158	-0.117	0.0793	0.013	0.464	0.99	1	0.01	0.509	0.296	1	1	0.971
40	14994380	TR26552|c1_g1_i1	Susceptible	3049	AH014588	9	14953272	14959358	UniRef100_A0A0K9QN76 Uncharacterized protein n=1 Tax=Spinacia oleracea RepID=A0A0K9QN76_SPIOL	0	91.99	UniRef100_UPI00052E8469 PREDICTED: uncharacterized protein At1g04910 n=1 Tax=Nelumbo nucifera RepID=UPI00052E8469	0	Bv_001260_fiic.t1 cDNAEvidence=100	0	90.8	AT5G35570.1 | Symbols: | O-fucosyltransferase family protein | chr5:13750101-13753383 REVERSE LENGTH=652	0	80.41	GO:0008150	biological_process	GO:0016757	transferase_activity,_transferring_glycosyl_groups	-1.29	-0.244	0.0625	-0.413	-0.699	-1.29	-0.903	0.304	-0.31	-0.378	0.163	1	0.992	0.921	0.196	0.202	0.038	1	0.999	0.739
41	22011141	TR30418|c3_g1_i4	Resistant	1517	AH014596	9	15022738	15026825	UniRef100_A0A0J8BUC2 Uncharacterized protein n=2 Tax=Beta vulgaris subsp. vulgaris RepID=A0A0J8BUC2_BETVU	0	88.34	UniRef100_UPI000520D1D7 PREDICTED: glutathione S-transferase omega-like 2 isoform X1 n=2 Tax=Nicotiana sylvestris RepID=UPI000520D1D7	0	Bv8_192540_jktu.t2 cDNAEvidence=86.7	0	88.34	AT4G19880.1 | Symbols: | Glutathione S-transferase family protein | chr4:10784691-10786376 REVERSE LENGTH=356	0	77.58	GO:0046686	response_to_cadmium_ion			1.7	0.822	0.818	-0.246	0.307	2.78	1.06	0.705	0.585	0.439	0.122	0.523	0.425	1	0.705	0.004	0.128	0.738	0.856	0.797
41	22011141	TR5161|c1_g2_i1	Resistant	1585	AH015218	9	21969016	21972348	UniRef100_A0A0J8EMN2 Uncharacterized protein n=1 Tax=Beta vulgaris subsp. vulgaris RepID=A0A0J8EMN2_BETVU	0	78.03	UniRef100_UPI000579E61B PREDICTED: pentatricopeptide repeat-containing protein At4g21705, mitochondrial isoform X1 n=2 Tax=Populus euphratica RepID=UPI000579E61B	0	Bv8_183320_zspt.t1 cDNAEvidence=85.7	0	78.03	AT4G21705.1 | Symbols: | Tetratricopeptide repeat (TPR)-like superfamily protein | chr4:11533257-11534817 REVERSE LENGTH=492	5e-178	57.4	GO:0008150	biological_process	GO:0003674	molecular_function	-2.82	-0.542	-0.727	0.466	-2.01	1.37	0.231	0.154	0.794	0.194	0.045	1	0.704	1	0.016	0.506	0.945	1	0.814	0.954
41	22011141	TR6105|c0_g1_i2	Resistant	1105	AH015224	9	22020220	22027679	UniRef100_A0A0J8EMM5 DNA-directed RNA polymerase n=13 Tax=Caryophyllales RepID=A0A0J8EMM5_BETVU	0	98.97	UniRef100_A0A0J8EMM5 DNA-directed RNA polymerase n=13 Tax=Caryophyllales RepID=A0A0J8EMM5_BETVU	0	Bv8_183220_jwww.t1 cDNAEvidence=100	0	98.97	AT4G21710.1 | Symbols: NRPB2, EMB1989, RPB2 | DNA-directed RNA polymerase family protein | chr4:11535684-11542200 REVERSE LENGTH=1188	0	96.38	GO:0000394 GO:0000956 GO:0006351 GO:0006366 GO:0009793	RNA_splicing,_via_endonucleolytic_cleavage_and_ligation nuclear-transcribed_mRNA_catabolic_process transcription,_DNA-templated transcription_from_RNA_polymerase_II_promoter embryo_development_ending_in_seed_dormancy	GO:0003677 GO:0003899	DNA_binding DNA-directed_RNA_polymerase_activity	-1.23	0.00853	0.111	0.0298	-1.38	1.2	0.0907	0.678	0.389	0.0415	0.338	1	0.984	1	0.011	0.472	0.982	0.816	1	0.995
41	22011141	TR10851|c0_g1_i2	Susceptible	3374	AH015229	9	22045256	22062436	UniRef100_A0A0J8BW57 Uncharacterized protein n=1 Tax=Beta vulgaris subsp. vulgaris RepID=A0A0J8BW57_BETVU	0	73.41	UniRef100_UPI00053FBDFC PREDICTED: probable ubiquitin-conjugating enzyme E2 24 isoform X1 n=1 Tax=Beta vulgaris subsp. vulgaris RepID=UPI00053FBDFC	0	Bv8_183150_otfp.t1 cDNAEvidence=95.2	0	73.41	AT2G33770.1 | Symbols: UBC24, ATUBC24, PHO2 | phosphate 2 | chr2:14277785-14281482 REVERSE LENGTH=907	0	44.24	GO:0006301 GO:0006817 GO:0016036 GO:0044257 GO:0055062 GO:2000185	postreplication_repair phosphate_ion_transport cellular_response_to_phosphate_starvation cellular_protein_catabolic_process phosphate_ion_homeostasis regulation_of_phosphate_transmembrane_transport	GO:0004842 GO:0005515	ubiquitin-protein_transferase_activity protein_binding	-1.89	-0.251	-0.217	-0.0327	-1.39	-0.364	-0.00842	-0.00355	0.0868	-0.439	0.092	1	0.954	1	0.009	0.899	1	1	1	0.765
42	15277021	TR20291|c3_g1_i7	Resistant	3003	AH015222	10	22010073	22013239	UniRef100_A0A0K9QHU6 Uncharacterized protein n=1 Tax=Spinacia oleracea RepID=A0A0K9QHU6_SPIOL	2e-83	63.11	UniRef100_F5CAE9 Ubiquitin ligase protein n=1 Tax=Vitis pseudoreticulata RepID=F5CAE9_9ROSI	3e-72	Bv8_183250_dqur.t1 cDNAEvidence=77.8	2e-84	68.02	AT4G03510.2 | Symbols: RMA1, ATRMA1 | RING membrane-anchor 1 | chr4:1557905-1558654 REVERSE LENGTH=249	3e-37	40.36	GO:0006511 GO:0032527 GO:0032940	ubiquitin-dependent_protein_catabolic_process protein_exit_from_endoplasmic_reticulum secretion_by_cell	GO:0004842 GO:0008270	ubiquitin-protein_transferase_activity zinc_ion_binding	0.41	0.41	-0.19	-0.109	0.298	1.89	1.72	-0.281	0.228	0.219	0.867	1	0.974	1	0.774	0.306	0.011	1	1	0.947
42	15277021	TR2690|c1_g2_i4	Resistant	585	AH015981	10	15239440	15247201	UniRef100_A0A0K9S254 Uncharacterized protein n=1 Tax=Spinacia oleracea RepID=A0A0K9S254_SPIOL	4e-74	84.21	UniRef100_UPI000498E711 PREDICTED: uncharacterized protein LOC103442281 isoform X4 n=1 Tax=Malus domestica RepID=UPI000498E711	3e-57	Bv_001890_qhhw.t2 cDNAEvidence=100	4e-75	82.96	AT3G01410.2 | Symbols: | Polynucleotidyl transferase, ribonuclease H-like superfamily protein | chr3:153650-155439 REVERSE LENGTH=294	2e-49	62.2	GO:0006310 GO:0007059 GO:0007062 GO:0007126 GO:0007129 GO:0007131 GO:0010332 GO:0031048 GO:0032204 GO:0032504 GO:0042138 GO:0043247 GO:0045132 GO:0048451 GO:0048453	DNA_recombination chromosome_segregation sister_chromatid_cohesion meiotic_nuclear_division synapsis reciprocal_meiotic_recombination response_to_gamma_radiation chromatin_silencing_by_small_RNA regulation_of_telomere_maintenance multicellular_organism_reproduction meiotic_DNA_double-strand_break_formation telomere_maintenance_in_response_to_DNA_damage meiotic_chromosome_segregation petal_formati…	GO:0004518	nuclease_activity	9.78	2.08	1.76	3.31	2.63	-3.41	0.227	-0.724	-2.71	-0.203	0.013	0.958	0.829	0.464	0.31	0.581	0.989	1	0.635	0.99
42	15277021	TR58360|c0_g1_i4	Susceptible	518	AH015987	10	15304409	15316395	UniRef100_A0A0J8BH02 Uncharacterized protein n=1 Tax=Beta vulgaris subsp. vulgaris RepID=A0A0J8BH02_BETVU	4e-103	93.6	UniRef100_G5DX93 Ubiquitin carboxyl-terminal hydrolase (Fragment) n=1 Tax=Silene latifolia RepID=G5DX93_SILLA	3e-95	Bv2_046170_pajf.t1 cDNAEvidence=100	2e-106	93.6	AT1G51710.2 | Symbols: UBP6 | ubiquitin-specific protease 6 | chr1:19175805-19179399 REVERSE LENGTH=443	9e-81	72.94	GO:0009640 GO:0010388 GO:0016567 GO:0016571 GO:0016579 GO:0045893	photomorphogenesis cullin_deneddylation protein_ubiquitination histone_methylation protein_deubiquitination positive_regulation_of_transcription,_DNA-templated	GO:0004843 GO:0005516	ubiquitin-specific_protease_activity calmodulin_binding	-3.04	0.141	0.2	0.875	-4.25	-1.59	-1.14	0.666	-0.147	-0.972	0.403	1	0.99	1	0.032	0.757	0.748	1	1	0.794
42	15277021	TR23244|c1_g1_i6	Susceptible	1867	AH015985	10	15278345	15283773	UniRef100_A0A0K9R978 Uncharacterized protein n=1 Tax=Spinacia oleracea RepID=A0A0K9R978_SPIOL	1e-106	84.51	UniRef100_A0A061ED41 Nodulin MtN21 /EamA transporter family protein n=1 Tax=Theobroma cacao RepID=A0A061ED41_THECC	9e-51	Bv_012880_tgcx.t2 cDNAEvidence=100	8e-109	86.15	AT5G40240.1 | Symbols: | nodulin MtN21 /EamA-like transporter family protein | chr5:16082325-16084466 REVERSE LENGTH=368	1e-42	44.1					1.48	0.366	0.542	-0.345	0.915	2.03	0.645	-0.209	1.06	0.542	0.162	1	0.719	1	0.066	0.039	0.482	1	0.126	0.61
43	15549883	TR728|c2_g2_i5	Overlap	1638	AH015986	10	15285890	15302850	UniRef100_A0A0J8C1E2 Uncharacterized protein n=1 Tax=Beta vulgaris subsp. vulgaris RepID=A0A0J8C1E2_BETVU	4e-118	81.25	UniRef100_G5DWC2 AP-1 complex subunit gamma-1 (Fragment) n=1 Tax=Silene latifolia RepID=G5DWC2_SILLA	3e-112	Bv6_149210_oyrw.t1 cDNAEvidence=100	2e-121	81.25	AT1G23900.2 | Symbols: GAMMA-ADAPTIN 1 | gamma-adaptin 1 | chr1:8441379-8447152 FORWARD LENGTH=876	2e-77	54.48	GO:0016192	vesicle-mediated_transport	GO:0005515 GO:0030276	protein_binding clathrin_binding	0.409	0.0304	-0.096	-0.202	0.676	-0.258	-0.708	0.12	-0.923	1.25	0.798	1	0.985	1	0.25	0.928	0.363	1	0.244	0.017
43	15549883	TR40278|c2_g1_i6	Resistant	644	AH016011	10	15539884	15542190	UniRef100_A0A0J8CVX2 Uncharacterized protein n=1 Tax=Beta vulgaris subsp. vulgaris RepID=A0A0J8CVX2_BETVU	3e-47	66.4	UniRef100_UPI0005FADF19 PREDICTED: protein FAM32A-like n=1 Tax=Jatropha curcas RepID=UPI0005FADF19	7e-35	Bv2_034930_mnuh.t2 cDNAEvidence=85.7	1e-50	66.4	AT1G16810.2 | Symbols: | unknown protein; CONTAINS InterPro DOMAIN/s: Protein of unknown function DUF1754, eukaryotic (InterPro:IPR013865); Has 35333 Blast hits to 34131 proteins in 2444 species: Archae - 798; Bacteria - 22429; Metazoa - 974; Fungi - 991; Plants - 531; Viruses - 0; Other Eukaryotes - 9610 (source: NCBI BLink). | chr1:5756150-5756694 FORWARD LENGTH=144	3e-25	48.28	GO:0008150	biological_process	GO:0003674	molecular_function	4.93	1.63	1.52	-0.0134	1.79	3.97	2.59	-0.506	0.389	1.5	0.015	0.432	0.59	1	0.076	0.131	0.007	1	1	0.34
43	15549883	TR41488|c4_g1_i3	Resistant	1650	AH016013	10	15550670	15556231	UniRef100_A0A0J8D067 Uncharacterized protein n=2 Tax=Beta vulgaris subsp. vulgaris RepID=A0A0J8D067_BETVU	0	71.67	UniRef100_UPI000510F192 PREDICTED: cryptochrome DASH, chloroplastic/mitochondrial n=1 Tax=Pyrus x bretschneideri RepID=UPI000510F192	0	Bv2_034990_twny.t1 cDNAEvidence=100	0	71.67	AT5G24850.1 | Symbols: CRY3 | cryptochrome 3 | chr5:8535399-8538016 REVERSE LENGTH=526	2e-173	75.93	GO:0006281 GO:0009744 GO:0009813 GO:0010224	DNA_repair response_to_sucrose flavonoid_biosynthetic_process response_to_UV-B	GO:0003677 GO:0003913 GO:0010181	DNA_binding DNA_photolyase_activity FMN_binding	1.1	0.133	-0.0739	0.0517	0.987	1.39	0.81	-0.00753	-0.0861	0.669	0.311	1	0.991	1	0.05	0.248	0.169	1	1	0.387
43	15549883	TR4092|c1_g1_i1	Susceptible	1150	AH016015	10	15569095	15580261	UniRef100_A0A0J8ENK1 Uncharacterized protein n=1 Tax=Beta vulgaris subsp. vulgaris RepID=A0A0J8ENK1_BETVU	2e-176	88.61	UniRef100_UPI00052F4047 PREDICTED: apoptosis inhibitor 5-like isoform X1 n=1 Tax=Nelumbo nucifera RepID=UPI00052F4047	2e-163	Bv8_182130_qwne.t1 cDNAEvidence=100	8e-180	88.61	AT2G34040.2 | Symbols: | Apoptosis inhibitory protein 5 (API5) | chr2:14378571-14382246 REVERSE LENGTH=442	3e-135	67.97					-2.07	-0.273	-0.159	-0.263	-1.37	-0.434	-0.266	0.429	-0.24	-0.356	0.033	1	0.966	1	0.009	0.847	0.884	0.991	1	0.813
44	16071943	TR40278|c2_g1_i6	Overlap	644	AH016011	10	15539884	15542190	UniRef100_A0A0J8CVX2 Uncharacterized protein n=1 Tax=Beta vulgaris subsp. vulgaris RepID=A0A0J8CVX2_BETVU	3e-47	66.4	UniRef100_UPI0005FADF19 PREDICTED: protein FAM32A-like n=1 Tax=Jatropha curcas RepID=UPI0005FADF19	7e-35	Bv2_034930_mnuh.t2 cDNAEvidence=85.7	1e-50	66.4	AT1G16810.2 | Symbols: | unknown protein; CONTAINS InterPro DOMAIN/s: Protein of unknown function DUF1754, eukaryotic (InterPro:IPR013865); Has 35333 Blast hits to 34131 proteins in 2444 species: Archae - 798; Bacteria - 22429; Metazoa - 974; Fungi - 991; Plants - 531; Viruses - 0; Other Eukaryotes - 9610 (source: NCBI BLink). | chr1:5756150-5756694 FORWARD LENGTH=144	3e-25	48.28	GO:0008150	biological_process	GO:0003674	molecular_function	4.93	1.63	1.52	-0.0134	1.79	3.97	2.59	-0.506	0.389	1.5	0.015	0.432	0.59	1	0.076	0.131	0.007	1	1	0.34
44	16071943	TR68529|c0_g1_i2	Resistant	741	AH016052	10	16066961	16067443	UniRef100_A0A0K9R4N4 Uncharacterized protein n=1 Tax=Spinacia oleracea RepID=A0A0K9R4N4_SPIOL	8e-72	84.72	UniRef100_D1MIX7 Small heat shock protein 17.4 kDa n=1 Tax=Vitis vinifera RepID=D1MIX7_VITVI	4e-59	Bv2_034220_scas.t1 cDNAEvidence=100	2e-66	78.32	AT5G12030.1 | Symbols: AT-HSP17.6A, HSP17.6, HSP17.6A | heat shock protein 17.6A | chr5:3884214-3884684 REVERSE LENGTH=156	1e-41	55.63	GO:0006457 GO:0006972 GO:0009408 GO:0009644 GO:0010286 GO:0034976 GO:0042542	protein_folding hyperosmotic_response response_to_heat response_to_high_light_intensity heat_acclimation response_to_endoplasmic_reticulum_stress response_to_hydrogen_peroxide	GO:0051082	unfolded_protein_binding	11.3	5.71	1.82	-2.51	6.23	9.65	4.91	0.281	-0.036	4.5	0.04	0.004	0.784	0.886	0.001	0.125	0.007	1	1	0.016
44	16071943	TR37445|c1_g2_i9	Resistant	579	AH016046	10	16017417	16025995	UniRef100_A0A0J8FQ17 Uncharacterized protein n=1 Tax=Beta vulgaris subsp. vulgaris RepID=A0A0J8FQ17_BETVU	1e-104	96.45	UniRef100_UPI0003D27C9E PREDICTED: omega-amidase NIT2-like n=1 Tax=Solanum tuberosum RepID=UPI0003D27C9E	2e-103	Bv2_034070_dedg.t1 cDNAEvidence=100	4e-108	96.45	AT5G12040.1 | Symbols: | Nitrilase/cyanide hydratase and apolipoprotein N-acyltransferase family protein | chr5:3885162-3887772 FORWARD LENGTH=369	9e-101	89.29	GO:0006807	nitrogen_compound_metabolic_process	GO:0008270 GO:0016810	zinc_ion_binding hydrolase_activity,_acting_on_carbon-nitrogen_(but_not_peptide)_bonds	1.88	0.262	0.344	-0.409	1.69	1.01	-0.0852	0.573	0.324	0.197	0.106	1	0.903	1	0.001	0.593	0.984	0.947	1	0.938
44	16071943	TR35686|c1_g1_i6	Resistant	1305	AH016055	10	16093388	16094784	UniRef100_A0A0K9R690 Uncharacterized protein n=1 Tax=Spinacia oleracea RepID=A0A0K9R690_SPIOL	5e-65	69.62	UniRef100_B1NHT7 WRKY DNA-binding protein n=1 Tax=Capsicum annuum RepID=B1NHT7_CAPAN	9e-42	Bv2_034240_wzwm.t2 cDNAEvidence=100	6e-67	69.94	AT5G26170.1 | Symbols: WRKY50, ATWRKY50 | WRKY DNA-binding protein 50 | chr5:9147176-9148128 REVERSE LENGTH=173	6e-37	77.78	GO:0006355 GO:0009867 GO:0050832	regulation_of_transcription,_DNA-templated jasmonic_acid_mediated_signaling_pathway defense_response_to_fungus	GO:0003700	sequence-specific_DNA_binding_transcription_factor_activity	4.75	1.53	1.95	1.07	0.197	1.85	-0.699	0.708	1.02	0.823	0.009	0.687	0.289	0.824	0.906	0.557	0.836	1	0.872	0.73
44	16071943	TR34351|c3_g2_i2	Resistant	2135	AH016056	10	16104461	16108062	UniRef100_A0A0J8CWC0 Uncharacterized protein n=1 Tax=Beta vulgaris subsp. vulgaris RepID=A0A0J8CWC0_BETVU	0	88.51	UniRef100_UPI0005206B82 PREDICTED: (S)-coclaurine N-methyltransferase-like n=1 Tax=Nicotiana sylvestris RepID=UPI0005206B82	0	Bv2_034270_pxin.t1 cDNAEvidence=100	0	88.51	AT4G33110.2 | Symbols: | S-adenosyl-L-methionine-dependent methyltransferases superfamily protein | chr4:15972497-15974531 REVERSE LENGTH=355	0	71.26			GO:0030794	(S)-coclaurine-N-methyltransferase_activity	2.74	0.489	0.991	0.219	1.04	1.53	0.0995	0.327	0.291	0.818	0.005	0.988	0.291	1	0.056	0.283	0.979	1	1	0.33
44	16071943	TR68543|c0_g2_i1	Susceptible	1430	AH016058	10	16112601	16121535	UniRef100_A0A0J8FQ44 Uncharacterized protein n=1 Tax=Beta vulgaris subsp. vulgaris RepID=A0A0J8FQ44_BETVU	0	92.36	UniRef100_UPI0003D77561 PREDICTED: aminopeptidase M1-like n=1 Tax=Citrus sinensis RepID=UPI0003D77561	0	Bv2_034310_wfkm.t1 cDNAEvidence=100	0	92.36	AT4G33090.1 | Symbols: APM1, ATAPM1 | aminopeptidase M1 | chr4:15965915-15970418 REVERSE LENGTH=879	0	76.63	GO:0006094 GO:0007010 GO:0009926 GO:0010359 GO:0010498	gluconeogenesis cytoskeleton_organization auxin_polar_transport regulation_of_anion_channel_activity proteasomal_protein_catabolic_process	GO:0004177	aminopeptidase_activity	-2.47	-0.713	-0.477	0.146	-1.43	-1.31	-0.257	-0.00158	-0.295	-0.76	0.027	0.828	0.833	1	0.016	0.459	0.924	1	1	0.49
44	16071943	TR34169|c0_g5_i1	Susceptible	1138	AH016049	10	16046176	16047189	UniRef100_A0A0J8D144 Uncharacterized protein n=1 Tax=Beta vulgaris subsp. vulgaris RepID=A0A0J8D144_BETVU	4e-155	83.64	UniRef100_UPI00051B5DDE PREDICTED: solute carrier family 25 member 44-like n=1 Tax=Nicotiana tomentosiformis RepID=UPI00051B5DDE	9e-114	Bv2_034190_kgxr.t1 cDNAEvidence=100	2e-158	83.64	AT1G72820.1 | Symbols: | Mitochondrial substrate carrier family protein | chr1:27403457-27404506 FORWARD LENGTH=349	5e-103	61.65	GO:0006810 GO:0006839	transport mitochondrial_transport			-1.02	-0.0719	-1.24	0.263	0.0305	2.89	-0.779	0.959	-0.034	2.74	0.654	1	0.487	1	0.989	0.125	0.711	0.882	1	0
45	20755021	TR84571|c0_g1_i1	Resistant	959	AH016051	10	16062596	16063311	UniRef100_A0A0K9Q9J2 Uncharacterized protein n=1 Tax=Spinacia oleracea RepID=A0A0K9Q9J2_SPIOL	2e-102	81.32	UniRef100_G7L459 Lipid transfer protein n=1 Tax=Medicago truncatula RepID=G7L459_MEDTR	2e-55	Bv1_006110_uece.t1 cDNAEvidence=100	3e-100	77.6	No informative hit E<10-6	NA	NA	NA	NA	NA	NA	2.72	1.17	0.927	1.77	-1.15	11.4	2.84	4.18	1.58	2.81	0.544	1	0.925	0.929	0.616	0.002	0.545	0.374	0.981	0.426
45	20755021	TR21745|c1_g1_i9	Resistant	2107	AH016441	10	20711025	20716317	UniRef100_UPI00053F8815 PREDICTED: BTB/POZ and MATH domain-containing protein 3 isoform X3 n=1 Tax=Beta vulgaris subsp. vulgaris RepID=UPI00053F8815	0	81.03	UniRef100_UPI00053F8815 PREDICTED: BTB/POZ and MATH domain-containing protein 3 isoform X3 n=1 Tax=Beta vulgaris subsp. vulgaris RepID=UPI00053F8815	0	Bv2_025440_rmxq.t1 cDNAEvidence=100	0	80.75	AT2G39760.2 | Symbols: ATBPM3, BPM3 | BTB/POZ/MATH-domains containing protein | chr2:16583213-16584815 FORWARD LENGTH=343	8e-163	67.78	GO:0006970 GO:0031396 GO:0071472	response_to_osmotic_stress regulation_of_protein_ubiquitination cellular_response_to_salt_stress	GO:0005515 GO:0042802	protein_binding identical_protein_binding	-2.48	-0.615	-0.341	-0.39	-1.13	-0.213	-0.101	0.108	-0.132	-0.0884	0.032	0.923	0.908	1	0.104	0.952	0.979	1	1	0.98
45	20755021	TR92118|c0_g2_i1	Resistant	841	AH016444	10	20733563	20736516	UniRef100_A0A0J8D295 Uncharacterized protein n=1 Tax=Beta vulgaris subsp. vulgaris RepID=A0A0J8D295_BETVU	4e-136	95.65	UniRef100_B9SE08 Mannose-1-phosphate guanyltransferase, putative n=1 Tax=Ricinus communis RepID=B9SE08_RICCO	2e-135	Bv2_025490_drof.t1 cDNAEvidence=100	2e-139	95.65	AT2G39770.2 | Symbols: CYT1 | Glucose-1-phosphate adenylyltransferase family protein | chr2:16589401-16590741 FORWARD LENGTH=361	1e-132	91.75	GO:0006007 GO:0006094 GO:0007010 GO:0009058 GO:0009408 GO:0009651 GO:0009753 GO:0010193 GO:0010498 GO:0019853 GO:0030244 GO:0042742 GO:0060359	glucose_catabolic_process gluconeogenesis cytoskeleton_organization biosynthetic_process response_to_heat response_to_salt_stress response_to_jasmonic_acid response_to_ozone proteasomal_protein_catabolic_process L-ascorbic_acid_biosynthetic_process cellulose_biosynthetic_process defense_response_to_bacterium response_to_ammonium_ion	GO:0004475 GO:0005515 GO:0016779	mannose-1-phosphate_guanylyltransferase_activity protein_binding nucleotidyltransferase_activity	-0.667	0.532	0.21	0.592	-2	-0.401	-0.513	0.586	-0.421	-0.0531	0.799	1	0.974	1	0.03	0.922	0.826	1	1	0.995
45	20755021	TR38563|c1_g2_i8	Resistant	1723	AH016449	10	20772819	20779922	UniRef100_A0A0K9RBL2 Folylpolyglutamate synthase n=1 Tax=Spinacia oleracea RepID=A0A0K9RBL2_SPIOL	0	83.58	UniRef100_A0A0K9RBL2 Folylpolyglutamate synthase n=1 Tax=Spinacia oleracea RepID=A0A0K9RBL2_SPIOL	0	Bv2_025580_frpi.t1 cDNAEvidence=100	0	83.27	AT5G05980.1 | Symbols: ATDFB, DFB, FPGS1 | DHFS-FPGS homolog B | chr5:1799738-1804441 REVERSE LENGTH=571	0	64.02	GO:0006730 GO:0010449 GO:0046901 GO:0048364 GO:0048767	one-carbon_metabolic_process root_meristem_growth tetrahydrofolylpolyglutamate_biosynthetic_process root_development root_hair_elongation	GO:0004326	tetrahydrofolylpolyglutamate_synthase_activity	-1.45	-0.0454	-0.0754	0.207	-1.53	-0.974	-0.434	-0.163	0.32	-0.697	0.307	1	0.993	1	0.027	0.677	0.814	1	1	0.703
45	20755021	TR15537|c0_g2_i11	Susceptible	1945	AH016451	10	20796316	20802135	UniRef100_A0A0K9RDF4 Uncharacterized protein n=1 Tax=Spinacia oleracea RepID=A0A0K9RDF4_SPIOL	0	90	UniRef100_B9SE23 Zinc ion binding protein, putative n=1 Tax=Ricinus communis RepID=B9SE23_RICCO	0	Bv2_025600_eucd.t1 cDNAEvidence=100	0	89.63	AT2G39830.1 | Symbols: DAR2 | DA1-related protein 2 | chr2:16619950-16623658 REVERSE LENGTH=528	0	67.04	GO:0010088 GO:0048364	phloem_development root_development			-2.15	0.232	-0.201	-0.588	-1.6	-1.43	-0.356	-0.283	-0.21	-0.578	0.1	1	0.968	0.937	0.014	0.475	0.897	1	1	0.717
45	20755021	TR26554|c0_g2_i2	Susceptible	1203	AH016445	10	20737946	20740221	UniRef100_A0A0J8FRL9 Uncharacterized protein n=1 Tax=Beta vulgaris subsp. vulgaris RepID=A0A0J8FRL9_BETVU	2e-98	76.59	UniRef100_A0A061FTJ5 Mitochondrial glycoprotein family protein, putative isoform 1 n=1 Tax=Theobroma cacao RepID=A0A061FTJ5_THECC	2e-76	Bv2_025510_ezno.t1 cDNAEvidence=100	7e-102	76.59	AT3G55605.1 | Symbols: | Mitochondrial glycoprotein family protein | chr3:20622668-20623889 FORWARD LENGTH=258	4e-60	54.07	GO:0006626 GO:0008150 GO:0009560 GO:0009640 GO:0009909 GO:0010388 GO:0034968	protein_targeting_to_mitochondrion biological_process embryo_sac_egg_cell_differentiation photomorphogenesis regulation_of_flower_development cullin_deneddylation histone_lysine_methylation	GO:0003674	molecular_function	1.03	0.341	0.278	0.447	-0.035	2.54	0.317	0.596	1.02	0.599	0.355	1	0.907	0.954	0.974	0.002	0.849	0.811	0.146	0.502
45	20755021	TR35693|c2_g1_i1	Susceptible	1439	AH016446	10	20741220	20743020	UniRef100_A0A0K9QRH4 Uncharacterized protein n=1 Tax=Spinacia oleracea RepID=A0A0K9QRH4_SPIOL	3e-94	60.38	UniRef100_UPI00046DD5F0 PREDICTED: uncharacterized protein At2g39795, mitochondrial-like n=1 Tax=Prunus mume RepID=UPI00046DD5F0	2e-70	Bv2_025510_ezno.t1 cDNAEvidence=100	2e-94	61.45	AT3G55605.1 | Symbols: | Mitochondrial glycoprotein family protein | chr3:20622668-20623889 FORWARD LENGTH=258	2e-56	45	GO:0006626 GO:0008150 GO:0009560 GO:0009640 GO:0009909 GO:0010388 GO:0034968	protein_targeting_to_mitochondrion biological_process embryo_sac_egg_cell_differentiation photomorphogenesis regulation_of_flower_development cullin_deneddylation histone_lysine_methylation	GO:0003674	molecular_function	0.223	0.0644	0.663	-0.232	-0.272	3.12	0.249	0.88	0.777	1.22	0.932	1	0.688	1	0.778	0.003	0.931	0.59	0.743	0.135
45	20755021	TR7939|c1_g1_i8	Susceptible	2397	AH016447	10	20743689	20758746	UniRef100_U3PVS3 Pyrroline-5-carboxylate synthetase n=2 Tax=Salicornia bigelovii RepID=U3PVS3_SALBI	0	86.87	UniRef100_U3PVS3 Pyrroline-5-carboxylate synthetase n=2 Tax=Salicornia bigelovii RepID=U3PVS3_SALBI	0	Bv2_025540_otig.t2 cDNAEvidence=97.7	0	90.18	AT3G55610.1 | Symbols: P5CS2 | delta 1-pyrroline-5-carboxylate synthase 2 | chr3:20624278-20628989 REVERSE LENGTH=726	0	74.72	GO:0006561 GO:0009555 GO:0009737 GO:0009793 GO:0042538	proline_biosynthetic_process pollen_development response_to_abscisic_acid embryo_development_ending_in_seed_dormancy hyperosmotic_salinity_response			-0.472	0.175	-0.382	-0.0606	-0.205	1.71	1.32	0.575	0.0684	-0.249	0.753	1	0.847	1	0.78	0.115	0.003	0.866	1	0.886
46	21303224	TR50091|c1_g1_i2	Resistant	931	AH016452	10	20803592	20807066	UniRef100_A0A0K9RD07 Uncharacterized protein n=1 Tax=Spinacia oleracea RepID=A0A0K9RD07_SPIOL	3e-108	82.81	UniRef100_A0A061FKY2 Mitochondrial substrate carrier family protein isoform 2 n=1 Tax=Theobroma cacao RepID=A0A061FKY2_THECC	6e-97	Bv2_025610_jnoc.t2 cDNAEvidence=76.2	3e-89	84.56	AT3G53940.1 | Symbols: | Mitochondrial substrate carrier family protein | chr3:19971258-19973564 REVERSE LENGTH=365	2e-82	66.85	GO:0006810 GO:0006839 GO:0009220	transport mitochondrial_transport pyrimidine_ribonucleotide_biosynthetic_process	GO:0005215	transporter_activity	-0.145	0.176	0.0356	-0.468	0.111	1.24	1.12	0.036	-0.106	0.191	0.96	1	1	1	0.907	0.507	0.037	1	1	0.929
46	21303224	TR42787|c1_g2_i1	Resistant	5851	AH016508	10	21280084	21315147	UniRef100_UPI00053FB0D0 PREDICTED: HEAT repeat-containing protein 5B isoform X1 n=1 Tax=Beta vulgaris subsp. vulgaris RepID=UPI00053FB0D0	0	85.03	UniRef100_UPI00053FB0D0 PREDICTED: HEAT repeat-containing protein 5B isoform X1 n=1 Tax=Beta vulgaris subsp. vulgaris RepID=UPI00053FB0D0	0	Bv2_026650_ytet.t1 cDNAEvidence=97.9	0	84.35	AT1G67140.1 | Symbols: SWEETIE | HEAT repeat-containing protein | chr1:25101016-25117372 REVERSE LENGTH=2221	0	60.11	GO:0000226 GO:0000911 GO:0005975 GO:0005982 GO:0005991 GO:0009616 GO:0009630 GO:0010050 GO:0010228 GO:0010267 GO:0016926 GO:0035196 GO:0050665	microtubule_cytoskeleton_organization cytokinesis_by_cell_plate_formation carbohydrate_metabolic_process starch_metabolic_process trehalose_metabolic_process virus_induced_gene_silencing gravitropism vegetative_phase_change vegetative_to_reproductive_phase_transition_of_meristem production_of_ta-siRNAs_involved_in_RNA_interference protein_desumoylation production_of_miRNAs_involved_in_gene_silenc…			-2.57	-0.61	-1.08	-0.0488	-0.828	-1.16	-0.419	-0.189	-0.305	-0.248	0.009	0.85	0.176	1	0.196	0.462	0.781	1	1	0.904
46	21303224	TR38486|c2_g1_i4	Resistant	1084	AH016509	10	21315876	21323275	UniRef100_A0A0J8D2W4 NADPH-dependent diflavin oxidoreductase 1 n=1 Tax=Beta vulgaris subsp. vulgaris RepID=A0A0J8D2W4_BETVU	1e-126	80.69	UniRef100_A0A0J8D2W4 NADPH-dependent diflavin oxidoreductase 1 n=1 Tax=Beta vulgaris subsp. vulgaris RepID=A0A0J8D2W4_BETVU	1e-126	Bv2_026660_rdmx.t1 cDNAEvidence=100	4e-130	80.69	AT3G02280.1 | Symbols: | Flavodoxin family protein | chr3:453646-457659 FORWARD LENGTH=623	6e-93	62.61	GO:0000724 GO:0006355 GO:0009640 GO:0009793 GO:0010212 GO:0010388 GO:0016567 GO:0016571 GO:0016579 GO:0043687 GO:0045893	double-strand_break_repair_via_homologous_recombination regulation_of_transcription,_DNA-templated photomorphogenesis embryo_development_ending_in_seed_dormancy response_to_ionizing_radiation cullin_deneddylation protein_ubiquitination histone_methylation protein_deubiquitination post-translational_protein_modification positive_regulation_of_transcription,_DNA-templated	GO:0005515 GO:0016491 GO:0016651	protein_binding oxidoreductase_activity oxidoreductase_activity,_acting_on_NAD(P)H	-3.06	-0.369	-1.47	0.179	-1.41	-0.151	0.0785	0.142	-0.133	-0.239	0.042	1	0.162	1	0.189	0.978	0.988	1	1	0.943
46	21303224	TR16285|c6_g1_i8	Susceptible	802	AH016510	10	21324184	21325971	UniRef100_P82412 30S ribosomal protein 3, chloroplastic n=2 Tax=Spinacia oleracea RepID=RRP3_SPIOL	3e-45	93.4	UniRef100_P82412 30S ribosomal protein 3, chloroplastic n=2 Tax=Spinacia oleracea RepID=RRP3_SPIOL	3e-45	Bv2_026700_krxz.t1 cDNAEvidence=100	4e-47	94.81	AT1G68590.1 | Symbols: | Ribosomal protein PSRP-3/Ycf65 | chr1:25757593-25758169 REVERSE LENGTH=166	7e-44	85.71	GO:0010103 GO:0019288 GO:0032544	stomatal_complex_morphogenesis isopentenyl_diphosphate_biosynthetic_process,_methylerythritol_4-phosphate_pathway plastid_translation	GO:0003735	structural_constituent_of_ribosome	2.43	0.844	0.404	0.114	1.06	0.811	0.605	-0.482	0.223	0.465	0.027	0.659	0.874	1	0.066	0.715	0.661	1	1	0.77
46	21303224	TR84740|c3_g1_i1	Susceptible	1278	AH016503	10	21236435	21242150	UniRef100_A0A0K9QPJ0 Uncharacterized protein n=1 Tax=Spinacia oleracea RepID=A0A0K9QPJ0_SPIOL	4e-122	76.03	UniRef100_UPI00053F9118 PREDICTED: allene oxide cyclase 2, chloroplastic-like isoform X1 n=1 Tax=Beta vulgaris subsp. vulgaris RepID=UPI00053F9118	1e-121	Bv2_026470_iksn.t1 cDNAEvidence=100	8e-124	75.62	AT1G13280.1 | Symbols: AOC4 | allene oxide cyclase 4 | chr1:4547624-4548552 FORWARD LENGTH=254	2e-82	64.17	GO:0009695	jasmonic_acid_biosynthetic_process	GO:0046423	allene-oxide_cyclase_activity	1.46	0.297	0.0221	0.485	0.653	-4.21	-1.55	-1.31	-1.7	0.352	0.614	1	1	1	0.651	0.049	0.358	0.829	0.481	0.942
47	21642619	TR15312|c7_g1_i4	Resistant	2025	AH016514	10	21359541	21361752	UniRef100_A0A0J8CYB4 Uncharacterized protein n=1 Tax=Beta vulgaris subsp. vulgaris RepID=A0A0J8CYB4_BETVU	7e-150	57.59	UniRef100_UPI00057A3785 PREDICTED: protein PLASTID MOVEMENT IMPAIRED 2 isoform X1 n=2 Tax=Populus euphratica RepID=UPI00057A3785	4e-64	Bv2_027280_wuzk.t1 cDNAEvidence=100	3e-153	57.59	AT1G66840.1 | Symbols: PMI2, WEB2 | Plant protein of unknown function (DUF827) | chr1:24933998-24936116 REVERSE LENGTH=607	2e-44	36.97	GO:0009637 GO:0009903 GO:0009904	response_to_blue_light chloroplast_avoidance_movement chloroplast_accumulation_movement	GO:0005515	protein_binding	0.189	-0.0325	0.472	0.0549	-0.306	1.58	0.413	0.657	-0.282	0.792	0.893	1	0.629	1	0.502	0.029	0.617	0.426	1	0.049
47	21642619	TR47572|c3_g1_i2	Resistant	528	AH016546	10	21622411	21625647	UniRef100_A0A0J8D346 Uncharacterized protein n=1 Tax=Beta vulgaris subsp. vulgaris RepID=A0A0J8D346_BETVU	6e-55	88.89	UniRef100_UPI0006AB686C PREDICTED: uncharacterized protein LOC106347847 isoform X2 n=1 Tax=Brassica napus RepID=UPI0006AB686C	3e-48	Bv2_027430_gizd.t1 cDNAEvidence=100	2e-58	88.89	AT5G64130.1 | Symbols: | cAMP-regulated phosphoprotein 19-related protein | chr5:25664547-25665339 REVERSE LENGTH=115	2e-50	77.78	GO:0008150	biological_process	GO:0003674	molecular_function	1.37	-0.0226	0.354	-0.109	1.15	1.64	0.248	0.174	0.235	0.987	0.288	1	0.9	1	0.041	0.266	0.927	1	1	0.197
47	21642619	TR28310|c1_g1_i3	Resistant	2485	AH016547	10	21626647	21630968	UniRef100_A0A0J8CY04 Uncharacterized protein n=1 Tax=Beta vulgaris subsp. vulgaris RepID=A0A0J8CY04_BETVU	1e-120	81.14	UniRef100_A0A061EGA0 RING/FYVE/PHD zinc finger superfamily protein n=1 Tax=Theobroma cacao RepID=A0A061EGA0_THECC	7e-72	Bv2_027450_tnsc.t1 cDNAEvidence=100	4e-124	81.14	AT2G01275.2 | Symbols: | RING/FYVE/PHD zinc finger superfamily protein | chr2:142610-143809 REVERSE LENGTH=259	3e-52	48.13			GO:0008270	zinc_ion_binding	2.53	0.617	0.797	-0.0361	1.15	-0.225	-0.0652	0.216	-0.0396	-0.336	0.023	0.941	0.65	1	0.031	0.953	0.991	1	1	0.845
47	21642619	TR12215|c1_g1_i6	Susceptible	1015	AH016553	10	21662118	21668263	UniRef100_A0A0K9R6F0 Uncharacterized protein n=1 Tax=Spinacia oleracea RepID=A0A0K9R6F0_SPIOL	8e-107	89.39	UniRef100_B9SPZ8 Methionyl-tRNA formyltransferase, putative n=1 Tax=Ricinus communis RepID=B9SPZ8_RICCO	2e-93	Bv2_027610_wesy.t1 cDNAEvidence=100	9e-109	88.83	AT1G66520.1 | Symbols: pde194 | formyltransferase, putative | chr1:24816330-24818693 REVERSE LENGTH=355	2e-92	77.22	GO:0009058 GO:0009152	biosynthetic_process purine_ribonucleotide_biosynthetic_process	GO:0008864 GO:0016742	formyltetrahydrofolate_deformylase_activity hydroxymethyl-,_formyl-_and_related_transferase_activity	-9.24	-0.556	-1.41	-0.794	-6.48	0.919	-0.736	-0.636	0.931	1.36	0.004	1	0.718	1	0.01	0.894	0.886	1	1	0.732
48	10860201	TR77944|c0_g1_i2	Overlap	1388	AH016552	11	21659299	21661567	UniRef100_A0A0J8D365 Uncharacterized protein n=1 Tax=Beta vulgaris subsp. vulgaris RepID=A0A0J8D365_BETVU	4e-151	80	UniRef100_UPI000540142F PREDICTED: uncharacterized protein LOC100245087 n=1 Tax=Vitis vinifera RepID=UPI000540142F	5e-124	Bv2_027580_fefm.t1 cDNAEvidence=100	2e-154	80	AT5G17460.1 | Symbols: | unknown protein; FUNCTIONS IN: molecular_function unknown; INVOLVED IN: response to salt stress; LOCATED IN: mitochondrion; Has 30201 Blast hits to 17322 proteins in 780 species: Archae - 12; Bacteria - 1396; Metazoa - 17338; Fungi - 3422; Plants - 5037; Viruses - 0; Other Eukaryotes - 2996 (source: NCBI BLink). | chr5:5757582-5758867 REVERSE LENGTH=309	3e-103	71.94			GO:0003674	molecular_function	0.0122	0.172	0.17	-0.631	0.301	3.31	-0.492	0.129	0.471	3.2	1	1	0.99	1	0.91	0.248	0.929	1	1	0.004
48	10860201	TR15432|c0_g2_i5	Resistant	1319	AH016993	11	10858249	10865313	UniRef100_A0A0J8D0L8 Uncharacterized protein n=1 Tax=Beta vulgaris subsp. vulgaris RepID=A0A0J8D0L8_BETVU	4e-105	80.2	UniRef100_UPI0005204337 PREDICTED: uncharacterized protein LOC104243745 n=1 Tax=Nicotiana sylvestris RepID=UPI0005204337	2e-88	Bv2_036140_unun.t1 cDNAEvidence=100	2e-108	80.2	AT5G58110.1 | Symbols: | chaperone binding;ATPase activators | chr5:23515275-23516479 FORWARD LENGTH=196	1e-78	61.42					1.28	0.264	0.0565	0.0485	0.915	1.92	1.08	-0.0973	0.0608	0.883	0.2	1	0.994	1	0.042	0.036	0.021	1	1	0.112
48	10860201	TR15432|c0_g2_i5	Resistant	1319	AH016993	11	10858249	10865313	UniRef100_A0A0J8D0L8 Uncharacterized protein n=1 Tax=Beta vulgaris subsp. vulgaris RepID=A0A0J8D0L8_BETVU	4e-105	80.2	UniRef100_UPI0005204337 PREDICTED: uncharacterized protein LOC104243745 n=1 Tax=Nicotiana sylvestris RepID=UPI0005204337	2e-88	Bv2_036140_unun.t1 cDNAEvidence=100	2e-108	80.2	AT5G58110.1 | Symbols: | chaperone binding;ATPase activators | chr5:23515275-23516479 FORWARD LENGTH=196	1e-78	61.42					1.28	0.264	0.0565	0.0485	0.915	1.92	1.08	-0.0973	0.0608	0.883	0.2	1	0.994	1	0.042	0.036	0.021	1	1	0.112
48	10860201	TR30837|c0_g2_i5	Susceptible	416	AH016994	11	10866057	10874071	UniRef100_A0A0K9RP59 Uncharacterized protein n=1 Tax=Spinacia oleracea RepID=A0A0K9RP59_SPIOL	4e-38	65.08	UniRef100_UPI00053FF8BA PREDICTED: zinc finger CCCH domain-containing protein 16 isoform X2 n=1 Tax=Beta vulgaris subsp. vulgaris RepID=UPI00053FF8BA	3e-37	Bv2_036110_cjmz.t1 cDNAEvidence=100	2e-40	61.9	AT1G75340.2 | Symbols: | Zinc finger C-x8-C-x5-C-x3-H type family protein | chr1:28269153-28271873 REVERSE LENGTH=398	4e-19	63.38	GO:0006355	regulation_of_transcription,_DNA-templated	GO:0003676 GO:0005515	nucleic_acid_binding protein_binding	-7.35	-0.301	-1.11	-0.518	-5.42	0.0186	-0.446	0.758	-0.717	0.424	0.033	1	0.796	1	0.05	1	0.94	1	1	0.944
49	15991772	TR15432|c0_g2_i5	Overlap	1319	AH016993	11	10858249	10865313	UniRef100_A0A0J8D0L8 Uncharacterized protein n=1 Tax=Beta vulgaris subsp. vulgaris RepID=A0A0J8D0L8_BETVU	4e-105	80.2	UniRef100_UPI0005204337 PREDICTED: uncharacterized protein LOC104243745 n=1 Tax=Nicotiana sylvestris RepID=UPI0005204337	2e-88	Bv2_036140_unun.t1 cDNAEvidence=100	2e-108	80.2	AT5G58110.1 | Symbols: | chaperone binding;ATPase activators | chr5:23515275-23516479 FORWARD LENGTH=196	1e-78	61.42					1.28	0.264	0.0565	0.0485	0.915	1.92	1.08	-0.0973	0.0608	0.883	0.2	1	0.994	1	0.042	0.036	0.021	1	1	0.112
49	15991772	TR3689|c2_g1_i2	Resistant	1371	AH017406	11	16006558	16008505	UniRef100_A0A0J8B6V5 Uncharacterized protein n=1 Tax=Beta vulgaris subsp. vulgaris RepID=A0A0J8B6V5_BETVU	2e-73	81.55	UniRef100_UPI00057B1C29 PREDICTED: uncharacterized protein LOC105051106 n=1 Tax=Elaeis guineensis var. tenera RepID=UPI00057B1C29	5e-53	Bv_006130_usye.t1 cDNAEvidence=100	9e-77	81.55	AT5G51010.1 | Symbols: | Rubredoxin-like superfamily protein | chr5:20744615-20745344 FORWARD LENGTH=154	3e-45	69.09			GO:0046872	metal_ion_binding	2.61	0.819	0.812	0.306	0.671	1.73	0.645	0.378	0.305	0.401	0	0.279	0.231	1	0.125	0.042	0.33	0.995	1	0.69
49	15991772	TR21095|c2_g1_i1	Resistant	2722	AH017398	11	15946970	15948901	UniRef100_A0A0K9RBR3 Uncharacterized protein n=1 Tax=Spinacia oleracea RepID=A0A0K9RBR3_SPIOL	0	85.15	UniRef100_Q6E438 ACT11D09.4 n=1 Tax=Cucumis melo RepID=Q6E438_CUCME	0	Bv6_145360_aeay.t1 cDNAEvidence=100	0	83.05	AT1G10270.1 | Symbols: GRP23 | glutamine-rich protein 23 | chr1:3363535-3366276 FORWARD LENGTH=913	0	66.94	GO:0000398 GO:0048825 GO:0051301	mRNA_splicing,_via_spliceosome cotyledon_development cell_division	GO:0005515	protein_binding	-0.981	0.118	-0.101	0.121	-1.12	0.728	0.023	0.0252	0.561	0.118	0.429	1	0.983	1	0.046	0.693	0.997	1	0.817	0.967
49	15991772	TR3928|c1_g1_i6	Resistant	1008	AH017402	11	15984335	15988192	UniRef100_A0A0K9RRN1 Uncharacterized protein n=1 Tax=Spinacia oleracea RepID=A0A0K9RRN1_SPIOL	2e-130	77.64	UniRef100_UPI0005401165 PREDICTED: protein real-time-like isoform X1 n=1 Tax=Beta vulgaris subsp. vulgaris RepID=UPI0005401165	2e-126	Bv_006090_htoc.t1 cDNAEvidence=100	1e-132	78.9	AT1G01630.1 | Symbols: | Sec14p-like phosphatidylinositol transfer family protein | chr1:229206-230675 FORWARD LENGTH=255	9e-100	61.44	GO:0006810 GO:0019344	transport cysteine_biosynthetic_process	GO:0005215	transporter_activity	0.657	-0.117	-0.518	-0.0993	1.39	-0.0266	0.365	-0.694	0.165	0.137	0.726	1	0.829	1	0.021	1	0.874	0.894	1	0.967
49	15991772	TR3689|c2_g1_i2	Resistant	1371	AH017406	11	16006558	16008505	UniRef100_A0A0J8B6V5 Uncharacterized protein n=1 Tax=Beta vulgaris subsp. vulgaris RepID=A0A0J8B6V5_BETVU	2e-73	81.55	UniRef100_UPI00057B1C29 PREDICTED: uncharacterized protein LOC105051106 n=1 Tax=Elaeis guineensis var. tenera RepID=UPI00057B1C29	5e-53	Bv_006130_usye.t1 cDNAEvidence=100	9e-77	81.55	AT5G51010.1 | Symbols: | Rubredoxin-like superfamily protein | chr5:20744615-20745344 FORWARD LENGTH=154	3e-45	69.09			GO:0046872	metal_ion_binding	2.61	0.819	0.812	0.306	0.671	1.73	0.645	0.378	0.305	0.401	0	0.279	0.231	1	0.125	0.042	0.33	0.995	1	0.69
50	16074503	TR16260|c0_g1_i6	Overlap	1316	AH017408	11	16014440	16018049	UniRef100_UPI00053FFCF6 PREDICTED: succinate dehydrogenase assembly factor 2, mitochondrial n=1 Tax=Beta vulgaris subsp. vulgaris RepID=UPI00053FFCF6	5e-96	76.24	UniRef100_UPI00053FFCF6 PREDICTED: succinate dehydrogenase assembly factor 2, mitochondrial n=1 Tax=Beta vulgaris subsp. vulgaris RepID=UPI00053FFCF6	5e-96	Bv_006150_rydi.t1 cDNAEvidence=100	1e-11	83.33	AT5G51040.1 | Symbols: | unknown protein; CONTAINS InterPro DOMAIN/s: Protein of unknown function DUF339 (InterPro:IPR005631); Has 532 Blast hits to 532 proteins in 207 species: Archae - 0; Bacteria - 285; Metazoa - 16; Fungi - 41; Plants - 40; Viruses - 0; Other Eukaryotes - 150 (source: NCBI BLink). | chr5:20750700-20751790 FORWARD LENGTH=188	7e-65	72.09	GO:0009062 GO:0080022	fatty_acid_catabolic_process primary_root_development	GO:0008177	succinate_dehydrogenase_(ubiquinone)_activity	2.23	0.554	0.693	0.0759	0.905	1.4	0.603	0.192	0.236	0.371	0.001	0.671	0.334	1	0.014	0.101	0.301	1	1	0.683
50	16074503	TR68484|c0_g1_i3	Overlap	826	AH017416	11	16068215	16070760	UniRef100_A0A0J8BAU3 Uncharacterized protein n=1 Tax=Beta vulgaris subsp. vulgaris RepID=A0A0J8BAU3_BETVU	8e-110	68.61	UniRef100_UPI00046E05C8 PREDICTED: probable glutathione S-transferase n=1 Tax=Prunus mume RepID=UPI00046E05C8	3e-93	Bv4_096480_fznp.t2 cDNAEvidence=71.4	3e-113	68.61	AT1G17180.1 | Symbols: ATGSTU25, GSTU25 | glutathione S-transferase TAU 25 | chr1:5872208-5872958 FORWARD LENGTH=221	1e-88	61.35	GO:0009407 GO:0010583	toxin_catabolic_process response_to_cyclopentenone	GO:0004364	glutathione_transferase_activity	7.14	1.2	2.19	3.12	0.629	10	2.53	2.17	3.65	1.68	0	0.735	0.064	0.005	0.58	0	0.012	0.104	0	0.194
50	16074503	TR34288|c8_g1_i6	Overlap	373	AH017417	11	16071904	16073970	UniRef100_A0A0J8E4I2 Uncharacterized protein n=1 Tax=Beta vulgaris subsp. vulgaris RepID=A0A0J8E4I2_BETVU	7e-58	73.33	UniRef100_UPI0004A60A77 PREDICTED: probable glutathione S-transferase n=1 Tax=Cucumis melo RepID=UPI0004A60A77	2e-41	Bv4_096480_fznp.t1 cDNAEvidence=85.7	3e-61	73.33	AT1G78340.1 | Symbols: ATGSTU22, GSTU22 | glutathione S-transferase TAU 22 | chr1:29473046-29473797 REVERSE LENGTH=218	1e-42	57.63	GO:0009407 GO:0010583	toxin_catabolic_process response_to_cyclopentenone	GO:0004364	glutathione_transferase_activity	1.59	0.748	-0.035	0.418	0.46	5.62	1.29	1.22	1.95	1.16	0.546	1	1	1	0.753	0.001	0.524	0.858	0.338	0.595
50	16074503	TR43586|c3_g1_i4	Resistant	1424	AH017418	11	16078331	16079999	UniRef100_A0A0K9QNV3 Uncharacterized protein n=1 Tax=Spinacia oleracea RepID=A0A0K9QNV3_SPIOL	1e-95	72.15	UniRef100_UPI0005FB075A PREDICTED: probable glutathione S-transferase parC n=1 Tax=Jatropha curcas RepID=UPI0005FB075A	9e-79	Bv_015440_wpzq.t1 cDNAEvidence=100	2e-89	67.73	AT1G78380.1 | Symbols: ATGSTU19, GST8, GSTU19 | glutathione S-transferase TAU 19 | chr1:29486659-29487819 REVERSE LENGTH=219	3e-73	56.16	GO:0006094 GO:0006096 GO:0006635 GO:0006979 GO:0009407 GO:0009651 GO:0010583 GO:0016036 GO:0019375 GO:0042631 GO:0043161 GO:0046686 GO:0051788 GO:0080129	gluconeogenesis glycolytic_process fatty_acid_beta-oxidation response_to_oxidative_stress toxin_catabolic_process response_to_salt_stress response_to_cyclopentenone cellular_response_to_phosphate_starvation galactolipid_biosynthetic_process cellular_response_to_water_deprivation proteasome-mediated_ubiquitin-dependent_protein_catabolic_process response_to_cadmium_ion response_to_misfolded_protein…	GO:0004364 GO:0043295	glutathione_transferase_activity glutathione_binding	9.87	2.92	4.19	2.2	0.554	18.1	4.89	4	3.65	5.54	0.008	0.457	0.243	0.896	0.871	0	0.011	0.165	0.299	0.098
50	16074503	TR43586|c3_g1_i4	Susceptible	1424	AH017418	11	16078331	16079999	UniRef100_A0A0K9QNV3 Uncharacterized protein n=1 Tax=Spinacia oleracea RepID=A0A0K9QNV3_SPIOL	1e-95	72.15	UniRef100_UPI0005FB075A PREDICTED: probable glutathione S-transferase parC n=1 Tax=Jatropha curcas RepID=UPI0005FB075A	9e-79	Bv_015440_wpzq.t1 cDNAEvidence=100	2e-89	67.73	AT1G78380.1 | Symbols: ATGSTU19, GST8, GSTU19 | glutathione S-transferase TAU 19 | chr1:29486659-29487819 REVERSE LENGTH=219	3e-73	56.16	GO:0006094 GO:0006096 GO:0006635 GO:0006979 GO:0009407 GO:0009651 GO:0010583 GO:0016036 GO:0019375 GO:0042631 GO:0043161 GO:0046686 GO:0051788 GO:0080129	gluconeogenesis glycolytic_process fatty_acid_beta-oxidation response_to_oxidative_stress toxin_catabolic_process response_to_salt_stress response_to_cyclopentenone cellular_response_to_phosphate_starvation galactolipid_biosynthetic_process cellular_response_to_water_deprivation proteasome-mediated_ubiquitin-dependent_protein_catabolic_process response_to_cadmium_ion response_to_misfolded_protein…	GO:0004364 GO:0043295	glutathione_transferase_activity glutathione_binding	9.87	2.92	4.19	2.2	0.554	18.1	4.89	4	3.65	5.54	0.008	0.457	0.243	0.896	0.871	0	0.011	0.165	0.299	0.098
50	16074503	TR34288|c8_g1_i6	Susceptible	373	AH017417	11	16071904	16073970	UniRef100_A0A0J8E4I2 Uncharacterized protein n=1 Tax=Beta vulgaris subsp. vulgaris RepID=A0A0J8E4I2_BETVU	7e-58	73.33	UniRef100_UPI0004A60A77 PREDICTED: probable glutathione S-transferase n=1 Tax=Cucumis melo RepID=UPI0004A60A77	2e-41	Bv4_096480_fznp.t1 cDNAEvidence=85.7	3e-61	73.33	AT1G78340.1 | Symbols: ATGSTU22, GSTU22 | glutathione S-transferase TAU 22 | chr1:29473046-29473797 REVERSE LENGTH=218	1e-42	57.63	GO:0009407 GO:0010583	toxin_catabolic_process response_to_cyclopentenone	GO:0004364	glutathione_transferase_activity	1.59	0.748	-0.035	0.418	0.46	5.62	1.29	1.22	1.95	1.16	0.546	1	1	1	0.753	0.001	0.524	0.858	0.338	0.595
51	17796579	TR43586|c3_g1_i4	Overlap	1424	AH017418	11	16078331	16079999	UniRef100_A0A0K9QNV3 Uncharacterized protein n=1 Tax=Spinacia oleracea RepID=A0A0K9QNV3_SPIOL	1e-95	72.15	UniRef100_UPI0005FB075A PREDICTED: probable glutathione S-transferase parC n=1 Tax=Jatropha curcas RepID=UPI0005FB075A	9e-79	Bv_015440_wpzq.t1 cDNAEvidence=100	2e-89	67.73	AT1G78380.1 | Symbols: ATGSTU19, GST8, GSTU19 | glutathione S-transferase TAU 19 | chr1:29486659-29487819 REVERSE LENGTH=219	3e-73	56.16	GO:0006094 GO:0006096 GO:0006635 GO:0006979 GO:0009407 GO:0009651 GO:0010583 GO:0016036 GO:0019375 GO:0042631 GO:0043161 GO:0046686 GO:0051788 GO:0080129	gluconeogenesis glycolytic_process fatty_acid_beta-oxidation response_to_oxidative_stress toxin_catabolic_process response_to_salt_stress response_to_cyclopentenone cellular_response_to_phosphate_starvation galactolipid_biosynthetic_process cellular_response_to_water_deprivation proteasome-mediated_ubiquitin-dependent_protein_catabolic_process response_to_cadmium_ion response_to_misfolded_protein…	GO:0004364 GO:0043295	glutathione_transferase_activity glutathione_binding	9.87	2.92	4.19	2.2	0.554	18.1	4.89	4	3.65	5.54	0.008	0.457	0.243	0.896	0.871	0	0.011	0.165	0.299	0.098
51	17796579	TR32279|c1_g2_i2	Resistant	1222	AH017567	11	17765202	17767668	UniRef100_A0A0K9R766 Uncharacterized protein n=1 Tax=Spinacia oleracea RepID=A0A0K9R766_SPIOL	7e-126	83.72	UniRef100_B9RLX0 Thioredoxin II, putative n=1 Tax=Ricinus communis RepID=B9RLX0_RICCO	4e-95	Bv5_114440_gfep.t1 cDNAEvidence=100	3e-129	83.72	AT5G61440.1 | Symbols: ACHT5 | atypical CYS HIS rich thioredoxin 5 | chr5:24707658-24708684 FORWARD LENGTH=245	2e-76	68.32					2.76	0.0485	1	0.678	1.03	3.16	0.222	0.677	0.223	2.04	0.007	1	0.325	0.624	0.025	0	0.951	0.835	1	0
51	17796579	TR21672|c0_g1_i1	Susceptible	619	AH017574	11	17836147	17838860	UniRef100_I0C050 CDF3 Dof zinc finger protein 3.3 (Fragment) n=1 Tax=Beta vulgaris subsp. vulgaris RepID=I0C050_BETVU	4e-65	76.62	UniRef100_I0C050 CDF3 Dof zinc finger protein 3.3 (Fragment) n=1 Tax=Beta vulgaris subsp. vulgaris RepID=I0C050_BETVU	4e-65	Bv5_114620_racn.t2 cDNAEvidence=100	2e-68	76.62	AT3G47500.1 | Symbols: CDF3 | cycling DOF factor 3 | chr3:17504276-17505964 REVERSE LENGTH=448	1e-21	46.34	GO:0006355	regulation_of_transcription,_DNA-templated	GO:0003677 GO:0003700 GO:0005515	DNA_binding sequence-specific_DNA_binding_transcription_factor_activity protein_binding	-1.27	-0.388	0.162	0.0108	-1.05	0.0185	0.113	0.0115	-0.0283	-0.0777	0.23	0.998	0.963	1	0.01	1	0.967	1	1	0.976
51	17796579	TR42844|c0_g1_i8	Susceptible	1856	AH017568	11	17776856	17782374	UniRef100_A0A0K9R767 Uncharacterized protein n=1 Tax=Spinacia oleracea RepID=A0A0K9R767_SPIOL	1e-161	84.27	UniRef100_UPI00046D9900 PREDICTED: histidine biosynthesis bifunctional protein hisIE, chloroplastic n=1 Tax=Prunus mume RepID=UPI00046D9900	4e-125	Bv5_114450_fjqu.t1 cDNAEvidence=93.3	1e-164	83.68	AT1G31860.1 | Symbols: AT-IE, HISN2 | histidine biosynthesis bifunctional protein (HISIE) | chr1:11434250-11436530 REVERSE LENGTH=281	4e-114	62.68	GO:0000105 GO:0009165	histidine_biosynthetic_process nucleotide_biosynthetic_process	GO:0004635 GO:0004636	phosphoribosyl-AMP_cyclohydrolase_activity phosphoribosyl-ATP_diphosphatase_activity	0.858	0.17	0.0133	0.173	0.502	1.54	-0.102	-0.18	0.687	1.14	0.511	1	1	1	0.401	0.245	0.978	1	0.696	0.044
52	839481	TR44412|c0_g1_i2	Resistant	1414	AH017571	12	17808109	17811189	UniRef100_A0A0J8CB05 Uncharacterized protein n=1 Tax=Beta vulgaris subsp. vulgaris RepID=A0A0J8CB05_BETVU	1e-132	78.23	UniRef100_A0A0D3RBN0 Expansin n=2 Tax=Nelumbo nucifera RepID=A0A0D3RBN0_NELNU	2e-122	Bv5_114530_ydgy.t1 cDNAEvidence=100	4e-136	78.23	AT1G26770.1 | Symbols: ATEXPA10, AT-EXP10, ATEXP10, ATHEXP ALPHA 1.1, EXP10, EXPA10 | expansin A10 | chr1:9259805-9260792 FORWARD LENGTH=249	4e-123	70.85	GO:0006949 GO:0009826 GO:0009828 GO:0009831	syncytium_formation unidimensional_cell_growth plant-type_cell_wall_loosening plant-type_cell_wall_modification_involved_in_multidimensional_cell_growth	GO:0005199	structural_constituent_of_cell_wall	0.752	0.0502	0.328	0.117	0.256	-0.784	1.13	-0.312	-0.433	-1.17	0.562	1	0.887	1	0.72	0.645	0.016	1	0.967	0.016
52	839481	TR850|c2_g2_i1	Resistant	825	AH018065	12	805930	810215	UniRef100_A0A0J8CIP2 Uncharacterized protein n=1 Tax=Beta vulgaris subsp. vulgaris RepID=A0A0J8CIP2_BETVU	7e-29	73.44	UniRef100_UPI00051BBF4D PREDICTED: high mobility group B protein 6-like isoform X2 n=1 Tax=Nicotiana tomentosiformis RepID=UPI00051BBF4D	2e-18	Bv5_099210_xfea.t1 cDNAEvidence=100	3e-32	73.44	No informative hit E<10-6	NA	NA	NA	NA	NA	NA	-3.12	-0.174	-0.936	-0.397	-1.61	-1.9	-0.494	0.0756	-0.427	-1.05	0.006	1	0.432	1	0.027	0.166	0.752	1	1	0.206
52	839481	TR13516|c0_g1_i4	Resistant	2206	AH018071	12	847836	849053	UniRef100_A0A0J8CYR1 Uncharacterized protein n=1 Tax=Beta vulgaris subsp. vulgaris RepID=A0A0J8CYR1_BETVU	4e-87	83.33	UniRef100_UPI00054001E6 PREDICTED: uncharacterized protein LOC104887273 isoform X1 n=1 Tax=Beta vulgaris subsp. vulgaris RepID=UPI00054001E6	1e-86	Bv2_039790_tawc.t1 cDNAEvidence=93.3	2e-90	83.33	AT3G29280.1 | Symbols: | unknown protein; Has 24 Blast hits to 24 proteins in 9 species: Archae - 0; Bacteria - 0; Metazoa - 0; Fungi - 0; Plants - 24; Viruses - 0; Other Eukaryotes - 0 (source: NCBI BLink). | chr3:11236705-11237947 REVERSE LENGTH=178	2e-72	71.43	GO:0008150	biological_process	GO:0003674	molecular_function	0.88	-0.107	0.215	-0.109	0.881	-0.143	-0.0475	-0.319	0.0993	0.124	0.359	1	0.925	1	0.026	0.959	0.99	1	1	0.949
52	839481	TR41242|c0_g1_i16	Susceptible	1252	AH018077	12	881564	882860	UniRef100_A0A0K9RUH7 Uncharacterized protein n=1 Tax=Spinacia oleracea RepID=A0A0K9RUH7_SPIOL	7e-17	53.26	No informative hit E<10-10	NA	No informative hit E<10-10	NA	NA	No informative hit E<10-6	NA	NA	NA	NA	NA	NA	-4.2	-1.63	0.282	-0.758	-2.09	-1.3	0.273	0.275	-1.3	-0.543	0.011	0.374	0.968	0.997	0.018	0.704	0.959	1	0.63	0.857
52	839481	TR23013|c1_g1_i1	Susceptible	1407	AH018064	12	798935	802792	UniRef100_A0A0J8CDY2 Uncharacterized protein n=1 Tax=Beta vulgaris subsp. vulgaris RepID=A0A0J8CDY2_BETVU	0	78.57	UniRef100_UPI00052ECE69 PREDICTED: protein trichome birefringence-like 25 n=1 Tax=Nelumbo nucifera RepID=UPI00052ECE69	0	Bv5_099220_nkon.t1 cDNAEvidence=100	0	78.57	AT4G11090.1 | Symbols: TBL23 | TRICHOME BIREFRINGENCE-LIKE 23 | chr4:6764645-6766221 REVERSE LENGTH=432	2e-155	51.16	GO:0008150	biological_process			-0.962	-0.254	-0.126	-0.232	-0.349	-0.9	0.526	0.248	-0.751	-0.923	0.356	1	0.974	1	0.55	0.492	0.466	1	0.411	0.029
53	2686101	TR66158|c1_g3_i2	Overlap	323	AH018075	12	863141	864480	UniRef100_A0A0C5AU59 Suaeda glauca salt-induced hydrophilic protein mRNA n=1 Tax=Suaeda glauca RepID=A0A0C5AU59_9CARY	5e-13	56.98	UniRef100_A0A0C5AU59 Suaeda glauca salt-induced hydrophilic protein mRNA n=1 Tax=Suaeda glauca RepID=A0A0C5AU59_9CARY	5e-13	Bv5_099100_cywa.t1 cDNAEvidence=100	5e-12	54.29	No informative hit E<10-6	NA	NA	NA	NA	NA	NA	3.77	0.15	1.2	1.55	0.881	5.33	-0.548	0.369	0.842	4.67	0.15	1	0.791	0.745	0.574	0.114	0.944	1	1	0.001
53	2686101	TR4411|c3_g1_i1	Resistant	3371	AH018233	12	2668480	2671717	UniRef100_A0A0J8BC68 Uncharacterized protein n=1 Tax=Beta vulgaris subsp. vulgaris RepID=A0A0J8BC68_BETVU	0	80.94	UniRef100_S4SKD9 Beta-amylase n=1 Tax=Actinidia chinensis RepID=S4SKD9_ACTCH	0	Bv5_124880_dagi.t1 cDNAEvidence=100	0	80.94	AT4G17090.1 | Symbols: CT-BMY, BAM3, BMY8 | chloroplast beta-amylase | chr4:9605266-9607250 REVERSE LENGTH=548	0	68.73	GO:0000024 GO:0005983 GO:0009409	maltose_biosynthetic_process starch_catabolic_process response_to_cold	GO:0016161	beta-amylase_activity	1.74	-0.0999	0.928	0.411	0.504	2.73	-0.0448	1.32	-0.0873	1.54	0.013	1	0.056	0.884	0.219	0	0.99	0	1	0
53	2686101	TR39568|c0_g1_i1	Resistant	1124	AH018235	12	2677893	2680712	UniRef100_A0A0J8E3H0 Uncharacterized protein n=1 Tax=Beta vulgaris subsp. vulgaris RepID=A0A0J8E3H0_BETVU	5e-109	84.21	UniRef100_UPI00046D9954 PREDICTED: probable receptor-like protein kinase At5g47070 n=1 Tax=Prunus mume RepID=UPI00046D9954	2e-87	Bv5_124900_ghuu.t1 cDNAEvidence=100	2e-112	84.21	AT5G47070.1 | Symbols: | Protein kinase superfamily protein | chr5:19118683-19120528 REVERSE LENGTH=410	1e-77	66.29	GO:0009627 GO:0009697	systemic_acquired_resistance salicylic_acid_biosynthetic_process	GO:0016301	kinase_activity	3.21	0.643	1.37	0.343	0.846	0.605	0.127	0.497	-0.141	0.123	0.013	1	0.228	1	0.309	0.87	0.987	1	1	0.98
53	2686101	TR41829|c1_g1_i7	Susceptible	2576	AH018236	12	2686465	2694425	UniRef100_A0A0K9RC65 Uncharacterized protein n=1 Tax=Spinacia oleracea RepID=A0A0K9RC65_SPIOL	2e-84	87.42	UniRef100_UPI00046DD866 PREDICTED: novel plant SNARE 11 isoform X2 n=1 Tax=Prunus mume RepID=UPI00046DD866	6e-75	Bv5_124910_htdn.t1 cDNAEvidence=100	3e-87	87.9	AT2G35190.1 | Symbols: NPSN11, ATNPSN11, NSPN11 | novel plant snare 11 | chr2:14831087-14832979 FORWARD LENGTH=265	8e-70	69.57	GO:0016192	vesicle-mediated_transport	GO:0005484 GO:0008565	SNAP_receptor_activity protein_transporter_activity	-2.7	-0.382	-0.146	-0.695	-1.47	-0.288	-0.693	-0.0381	0.257	0.186	0.019	1	0.974	0.745	0.071	0.925	0.404	1	1	0.948
54	9388651	TR15118|c2_g1_i8	Resistant	1478	AH018238	12	2711565	2714638	UniRef100_A0A0J8B9N4 Uncharacterized protein n=1 Tax=Beta vulgaris subsp. vulgaris RepID=A0A0J8B9N4_BETVU	0	80.63	UniRef100_UPI0005400C98 PREDICTED: uncharacterized protein LOC100854975 n=1 Tax=Vitis vinifera RepID=UPI0005400C98	2e-142	Bv5_124960_pdgq.t1 cDNAEvidence=100	0	80.63	AT4G17080.1 | Symbols: | Histone H3 K4-specific methyltransferase SET7/9 family protein | chr4:9601570-9603815 FORWARD LENGTH=513	6e-134	62.83					-0.381	-0.444	-0.077	0.04	0.0996	0.473	-0.357	0.0904	-0.377	1.12	0.789	0.977	0.989	1	0.899	0.807	0.801	1	0.951	0.016
54	9388651	TR73375|c3_g3_i7	Resistant	1098	AH018786	12	9367041	9371433	UniRef100_A0A0K9RIT3 Uncharacterized protein n=1 Tax=Spinacia oleracea RepID=A0A0K9RIT3_SPIOL	1e-66	82.03	UniRef100_UPI0005112650 PREDICTED: outer envelope pore protein 16, chloroplastic-like isoform X2 n=1 Tax=Pyrus x bretschneideri RepID=UPI0005112650	5e-61	Bv5_102480_emup.t1 cDNAEvidence=100	5e-69	82.68	AT2G28900.1 | Symbols: OEP16, ATOEP16-L, ATOEP16-1, OEP16-1 | outer plastid envelope protein 16-1 | chr2:12414423-12415459 REVERSE LENGTH=148	2e-45	54.4	GO:0009409 GO:0009611 GO:0009744 GO:0009749 GO:0009753 GO:0015031 GO:0042742 GO:0045037	response_to_cold response_to_wounding response_to_sucrose response_to_glucose response_to_jasmonic_acid protein_transport defense_response_to_bacterium protein_import_into_chloroplast_stroma	GO:0015171 GO:0015450	amino_acid_transmembrane_transporter_activity P-P-bond-hydrolysis-driven_protein_transmembrane_transporter_activity	2.71	0.728	0.271	0.698	1.01	0.275	-0.184	-0.196	0.203	0.451	0.004	0.716	0.929	0.708	0.058	0.929	0.948	1	1	0.748
54	9388651	TR15067|c1_g2_i1	Resistant	1610	AH018787	12	9395012	9405123	UniRef100_A0A0K9QFQ0 Uncharacterized protein n=1 Tax=Spinacia oleracea RepID=A0A0K9QFQ0_SPIOL	0	76.47	UniRef100_Q6R2R4 CAX n=1 Tax=Suaeda salsa RepID=Q6R2R4_SUASA	0	Bv7_172200_jngj.t2 cDNAEvidence=88	8e-146	70.53	AT3G51860.1 | Symbols: CAX3, ATHCX1, CAX1-LIKE, ATCAX3 | cation exchanger 3 | chr3:19239458-19242519 FORWARD LENGTH=459	3e-172	70.67	GO:0006793 GO:0006812 GO:0006814 GO:0006816 GO:0006874 GO:0006882 GO:0009624 GO:0010351 GO:0030026 GO:0051592 GO:0055062	phosphorus_metabolic_process cation_transport sodium_ion_transport calcium_ion_transport cellular_calcium_ion_homeostasis cellular_zinc_ion_homeostasis response_to_nematode lithium_ion_transport cellular_manganese_ion_homeostasis response_to_calcium_ion phosphate_ion_homeostasis	GO:0005515 GO:0015368 GO:0015369 GO:0015491	protein_binding calcium:cation_antiporter_activity calcium:proton_antiporter_activity cation_transport	-1.37	-0.377	-0.324	0.483	-1.16	-0.215	-0.635	0.528	-0.209	0.101	0.146	1	0.865	0.887	0.007	0.937	0.401	0.867	1	0.967
54	9388651	TR35774|c2_g4_i12	Resistant	1622	AH018788	12	9411861	9420547	UniRef100_A0A0J8CER9 Uncharacterized protein n=1 Tax=Beta vulgaris subsp. vulgaris RepID=A0A0J8CER9_BETVU	4e-146	86.5	UniRef100_UPI0005816BD8 PREDICTED: probable envelope ADP,ATP carrier protein, chloroplastic n=1 Tax=Sesamum indicum RepID=UPI0005816BD8	6e-135	Bv5_102570_qgiz.t1 cDNAEvidence=100	2e-149	86.5	AT3G51870.1 | Symbols: | Mitochondrial substrate carrier family protein | chr3:19243978-19246611 FORWARD LENGTH=381	2e-131	74.58	GO:0006810 GO:0009624	transport response_to_nematode	GO:0005215	transporter_activity	3.07	0.18	0.448	0.808	1.63	1.15	-0.55	0.456	0.743	0.499	0.058	1	0.918	0.917	0.05	0.701	0.838	1	0.949	0.853
54	9388651	TR30670|c1_g1_i12	Susceptible	1823	AH018790	12	9442587	9446594	UniRef100_C5YVW3 Eukaryotic translation initiation factor 3 subunit D n=1 Tax=Sorghum bicolor RepID=C5YVW3_SORBI	0	77.94	UniRef100_C5YVW3 Eukaryotic translation initiation factor 3 subunit D n=1 Tax=Sorghum bicolor RepID=C5YVW3_SORBI	0	Bv8_199420_cywd.t1 cDNAEvidence=100	9e-176	82.83	AT4G20980.4 | Symbols: | Eukaryotic translation initiation factor 3 subunit 7 (eIF-3) | chr4:11216997-11218772 FORWARD LENGTH=591	2e-164	78.31	GO:0006413	translational_initiation	GO:0003743	translation_initiation_factor_activity	-2.06	-0.322	-0.0649	-0.189	-1.49	0.835	0.172	0.407	0.133	0.123	0.101	1	0.995	1	0.023	0.714	0.961	1	1	0.972
55	9806580	TR41899|c2_g1_i1	Overlap	2298	AH018783	12	9326756	9332334	UniRef100_A0A0J8CJP9 Uncharacterized protein n=2 Tax=Beta vulgaris subsp. vulgaris RepID=A0A0J8CJP9_BETVU	0	81.59	UniRef100_UPI0001982C00 PREDICTED: uncharacterized protein LOC100264895 n=1 Tax=Vitis vinifera RepID=UPI0001982C00	2e-153	Bv5_102450_txjr.t1 cDNAEvidence=100	0	81.59	AT4G19160.3 | Symbols: | unknown protein; Has 315 Blast hits to 315 proteins in 152 species: Archae - 0; Bacteria - 250; Metazoa - 2; Fungi - 0; Plants - 46; Viruses - 0; Other Eukaryotes - 17 (source: NCBI BLink). | chr4:10477521-10479947 FORWARD LENGTH=441	1e-122	61.78	GO:0008150	biological_process			-1.41	-0.171	-0.299	-0.104	-0.841	-1.85	-0.265	-0.153	-0.416	-1.02	0.096	1	0.862	1	0.071	0.014	0.858	1	0.869	0.013
55	9806580	TR46595|c1_g1_i3	Resistant	568	AH018819	12	9814461	9816204	UniRef100_A0A0K9R401 Uncharacterized protein n=1 Tax=Spinacia oleracea RepID=A0A0K9R401_SPIOL	1e-58	67.79	UniRef100_D7L2F8 Early light-inducable protein n=1 Tax=Arabidopsis lyrata subsp. lyrata RepID=D7L2F8_ARALL	2e-36	Bv5_102960_daor.t1 cDNAEvidence=100	1e-53	63.16	AT3G22840.1 | Symbols: ELIP1, ELIP | Chlorophyll A-B binding family protein | chr3:8084628-8085445 REVERSE LENGTH=195	5e-32	48.15	GO:0009409 GO:0009411 GO:0009718 GO:0009744 GO:0009813 GO:0010030 GO:0010117 GO:0010224 GO:0010380 GO:0034605 GO:0071483 GO:0071486 GO:0071490 GO:0071491 GO:0071492 GO:0080167	response_to_cold response_to_UV anthocyanin-containing_compound_biosynthetic_process response_to_sucrose flavonoid_biosynthetic_process positive_regulation_of_seed_germination photoprotection response_to_UV-B regulation_of_chlorophyll_biosynthetic_process cellular_response_to_heat cellular_response_to_blue_light cellular_response_to_high_light_intensity cellular_response_to_far_red_light cellular…	GO:0016168	chlorophyll_binding	4.7	1.15	0.945	-0.0901	2.7	2.13	2.48	0.459	-0.352	-0.455	0.358	0.903	0.831	1	0.009	0.561	0.025	1	1	0.909
55	9806580	TR3930|c0_g1_i12	Resistant	2490	AH018811	12	9729715	9739059	UniRef100_UPI00054017A0 PREDICTED: phosphoinositide phosphatase SAC8 isoform X2 n=1 Tax=Beta vulgaris subsp. vulgaris RepID=UPI00054017A0	0	87.69	UniRef100_UPI00054017A0 PREDICTED: phosphoinositide phosphatase SAC8 isoform X2 n=1 Tax=Beta vulgaris subsp. vulgaris RepID=UPI00054017A0	0	Bv5_102860_iscd.t1 cDNAEvidence=100	0	86.15	AT3G51830.1 | Symbols: ATG5, SAC8 | SAC domain-containing protein 8 | chr3:19220237-19225092 FORWARD LENGTH=588	0	65.81	GO:0032957 GO:0046855	inositol_trisphosphate_metabolic_process inositol_phosphate_dephosphorylation	GO:0004439	phosphatidylinositol-4,5-bisphosphate_5-phosphatase_activity	1.43	0.157	0.288	0.169	0.821	0.885	0.114	0.142	0.122	0.508	0.039	1	0.834	1	0.023	0.406	0.956	1	1	0.443
55	9806580	TR32351|c3_g2_i5	Resistant	2949	AH018815	12	9770348	9781855	UniRef100_A0A0J8F8Y0 Uncharacterized protein n=1 Tax=Beta vulgaris subsp. vulgaris RepID=A0A0J8F8Y0_BETVU	0	97.1	UniRef100_A0A061ERB2 AMP deaminase / myoadenylate deaminase, putative isoform 1 n=1 Tax=Theobroma cacao RepID=A0A061ERB2_THECC	0	Bv5_102910_yyrr.t1 cDNAEvidence=100	0	97.1	AT2G38280.2 | Symbols: FAC1, ATAMPD | AMP deaminase, putative / myoadenylate deaminase, putative | chr2:16033767-16038793 REVERSE LENGTH=839	0	91.46	GO:0007062 GO:0009165 GO:0009168 GO:0009640 GO:0009737 GO:0009793 GO:0009845 GO:0009880 GO:0009909 GO:0009933 GO:0010072 GO:0010162 GO:0010182 GO:0010228 GO:0010431 GO:0010564 GO:0016567 GO:0019915 GO:0045595 GO:0048366 GO:0048825 GO:0050826 GO:0051301	sister_chromatid_cohesion nucleotide_biosynthetic_process purine_ribonucleoside_monophosphate_biosynthetic_process photomorphogenesis response_to_abscisic_acid embryo_development_ending_in_seed_dormancy seed_germination embryonic_pattern_specification regulation_of_flower_development meristem_structural_organization primary_shoot_apical_meristem_specification seed_dormancy_process sugar_mediated_…	GO:0003876 GO:0005515 GO:0043424	AMP_deaminase_activity protein_binding protein_histidine_kinase_binding	-1.45	-0.385	-0.144	-0.237	-0.687	-0.677	-0.0586	-0.208	-0.184	-0.226	0.045	0.917	0.95	1	0.125	0.567	0.982	1	1	0.862
55	9806580	TR46595|c1_g1_i3	Resistant	568	AH018819	12	9814461	9816204	UniRef100_A0A0K9R401 Uncharacterized protein n=1 Tax=Spinacia oleracea RepID=A0A0K9R401_SPIOL	1e-58	67.79	UniRef100_D7L2F8 Early light-inducable protein n=1 Tax=Arabidopsis lyrata subsp. lyrata RepID=D7L2F8_ARALL	2e-36	Bv5_102960_daor.t1 cDNAEvidence=100	1e-53	63.16	AT3G22840.1 | Symbols: ELIP1, ELIP | Chlorophyll A-B binding family protein | chr3:8084628-8085445 REVERSE LENGTH=195	5e-32	48.15	GO:0009409 GO:0009411 GO:0009718 GO:0009744 GO:0009813 GO:0010030 GO:0010117 GO:0010224 GO:0010380 GO:0034605 GO:0071483 GO:0071486 GO:0071490 GO:0071491 GO:0071492 GO:0080167	response_to_cold response_to_UV anthocyanin-containing_compound_biosynthetic_process response_to_sucrose flavonoid_biosynthetic_process positive_regulation_of_seed_germination photoprotection response_to_UV-B regulation_of_chlorophyll_biosynthetic_process cellular_response_to_heat cellular_response_to_blue_light cellular_response_to_high_light_intensity cellular_response_to_far_red_light cellular…	GO:0016168	chlorophyll_binding	4.7	1.15	0.945	-0.0901	2.7	2.13	2.48	0.459	-0.352	-0.455	0.358	0.903	0.831	1	0.009	0.561	0.025	1	1	0.909
55	9806580	TR35123|c1_g1_i1	Resistant	975	AH018821	12	9832729	9838309	UniRef100_H2DQ01 Putative DNA binding protein n=1 Tax=Atriplex canescens RepID=H2DQ01_ATRCA	3e-179	82.69	UniRef100_A0A0A0LCR2 EBP1 n=1 Tax=Cucumis sativus RepID=A0A0A0LCR2_CUCSA	1e-174	Bv5_102980_uxei.t1 cDNAEvidence=100	0	82.69	AT3G51800.3 | Symbols: ATG2 | metallopeptidase M24 family protein | chr3:19211261-19213568 REVERSE LENGTH=385	1e-158	74.68	GO:0001510 GO:0006164 GO:0006508 GO:0006606 GO:0009220 GO:0009640 GO:0009735 GO:0010388	RNA_methylation purine_nucleotide_biosynthetic_process proteolysis protein_import_into_nucleus pyrimidine_ribonucleotide_biosynthetic_process photomorphogenesis response_to_cytokinin cullin_deneddylation	GO:0008235	metalloexopeptidase_activity	-0.924	0.12	-0.332	0.0812	-0.793	0.173	-0.127	0.125	0.183	-0.00802	0.275	1	0.801	1	0.039	0.939	0.948	1	1	1
55	9806580	TR38457|c0_g2_i3	Susceptible	1624	AH018825	12	9869886	9875891	UniRef100_A0A0K9RPP4 Uncharacterized protein n=1 Tax=Spinacia oleracea RepID=A0A0K9RPP4_SPIOL	0	84.47	UniRef100_UPI00053F6B87 PREDICTED: dnaJ protein ERDJ3A isoform X2 n=1 Tax=Vitis vinifera RepID=UPI00053F6B87	7e-162	Bv5_103020_mmxt.t1 cDNAEvidence=100	0	82.94	AT3G08970.1 | Symbols: ATERDJ3A, TMS1 | DNAJ heat shock N-terminal domain-containing protein | chr3:2737589-2740265 FORWARD LENGTH=572	3e-142	55.82	GO:0006457 GO:0009408 GO:0009644 GO:0009688 GO:0009860 GO:0010286 GO:0034605 GO:0042542	protein_folding response_to_heat response_to_high_light_intensity abscisic_acid_biosynthetic_process pollen_tube_growth heat_acclimation cellular_response_to_heat response_to_hydrogen_peroxide	GO:0016491	oxidoreductase_activity	1.21	-0.128	-0.0885	0.262	1.16	0.739	0.891	-0.556	-0.395	0.799	0.321	1	0.99	1	0.019	0.71	0.176	0.947	1	0.297
56	10015288	TR46595|c1_g1_i3	Overlap	568	AH018819	12	9814461	9816204	UniRef100_A0A0K9R401 Uncharacterized protein n=1 Tax=Spinacia oleracea RepID=A0A0K9R401_SPIOL	1e-58	67.79	UniRef100_D7L2F8 Early light-inducable protein n=1 Tax=Arabidopsis lyrata subsp. lyrata RepID=D7L2F8_ARALL	2e-36	Bv5_102960_daor.t1 cDNAEvidence=100	1e-53	63.16	AT3G22840.1 | Symbols: ELIP1, ELIP | Chlorophyll A-B binding family protein | chr3:8084628-8085445 REVERSE LENGTH=195	5e-32	48.15	GO:0009409 GO:0009411 GO:0009718 GO:0009744 GO:0009813 GO:0010030 GO:0010117 GO:0010224 GO:0010380 GO:0034605 GO:0071483 GO:0071486 GO:0071490 GO:0071491 GO:0071492 GO:0080167	response_to_cold response_to_UV anthocyanin-containing_compound_biosynthetic_process response_to_sucrose flavonoid_biosynthetic_process positive_regulation_of_seed_germination photoprotection response_to_UV-B regulation_of_chlorophyll_biosynthetic_process cellular_response_to_heat cellular_response_to_blue_light cellular_response_to_high_light_intensity cellular_response_to_far_red_light cellular…	GO:0016168	chlorophyll_binding	4.7	1.15	0.945	-0.0901	2.7	2.13	2.48	0.459	-0.352	-0.455	0.358	0.903	0.831	1	0.009	0.561	0.025	1	1	0.909
56	10015288	TR33431|c0_g1_i3	Overlap	1298	AH018838	12	10004348	10010246	UniRef100_A0A0J8CJZ6 Ferritin n=1 Tax=Beta vulgaris subsp. vulgaris RepID=A0A0J8CJZ6_BETVU	2e-123	84.44	UniRef100_A0A0J8CJZ6 Ferritin n=1 Tax=Beta vulgaris subsp. vulgaris RepID=A0A0J8CJZ6_BETVU	2e-123	Bv5_103250_ecgw.t1 cDNAEvidence=100	1e-126	84.44	AT5G01600.1 | Symbols: ATFER1, FER1 | ferretin 1 | chr5:228149-229594 REVERSE LENGTH=255	7e-83	75.76	GO:0000302 GO:0006826 GO:0006879 GO:0009409 GO:0009617 GO:0009735 GO:0009908 GO:0010039 GO:0010043 GO:0015979 GO:0042542 GO:0048366 GO:0055072	response_to_reactive_oxygen_species iron_ion_transport cellular_iron_ion_homeostasis response_to_cold response_to_bacterium response_to_cytokinin flower_development response_to_iron_ion response_to_zinc_ion photosynthesis response_to_hydrogen_peroxide leaf_development iron_ion_homeostasis	GO:0005506 GO:0008199	iron_ion_binding ferric_iron_binding	2.91	1.05	1.37	0.537	-0.0494	3.84	2.01	1.28	0.753	-0.197	0.007	0.406	0.1	0.969	0.97	0	0	0.149	0.751	0.943
56	10015288	TR64752|c0_g1_i1	Susceptible	1748	AH018839	12	10017491	10021008	UniRef100_A0A0J8DZ83 Uncharacterized protein n=2 Tax=Beta vulgaris subsp. vulgaris RepID=A0A0J8DZ83_BETVU	0	77.58	UniRef100_UPI0005CA21EE PREDICTED: cytochrome P450 72A15-like isoform X2 n=1 Tax=Fragaria vesca subsp. vesca RepID=UPI0005CA21EE	0	Bv_000950_fauw.t1 cDNAEvidence=90.9	0	77.58	AT3G14690.1 | Symbols: CYP72A15 | cytochrome P450, family 72, subfamily A, polypeptide 15 | chr3:4937410-4939310 FORWARD LENGTH=512	6e-162	47.58			GO:0019825	oxygen_binding	14.3	5.14	4.42	2.89	1.8	14.7	-0.809	5.72	2.85	6.92	0	0.296	0.221	0.621	0.59	0	0.94	0.155	0.594	0.01
56	10015288	TR33431|c0_g1_i3	Susceptible	1298	AH018838	12	10004348	10010246	UniRef100_A0A0J8CJZ6 Ferritin n=1 Tax=Beta vulgaris subsp. vulgaris RepID=A0A0J8CJZ6_BETVU	2e-123	84.44	UniRef100_A0A0J8CJZ6 Ferritin n=1 Tax=Beta vulgaris subsp. vulgaris RepID=A0A0J8CJZ6_BETVU	2e-123	Bv5_103250_ecgw.t1 cDNAEvidence=100	1e-126	84.44	AT5G01600.1 | Symbols: ATFER1, FER1 | ferretin 1 | chr5:228149-229594 REVERSE LENGTH=255	7e-83	75.76	GO:0000302 GO:0006826 GO:0006879 GO:0009409 GO:0009617 GO:0009735 GO:0009908 GO:0010039 GO:0010043 GO:0015979 GO:0042542 GO:0048366 GO:0055072	response_to_reactive_oxygen_species iron_ion_transport cellular_iron_ion_homeostasis response_to_cold response_to_bacterium response_to_cytokinin flower_development response_to_iron_ion response_to_zinc_ion photosynthesis response_to_hydrogen_peroxide leaf_development iron_ion_homeostasis	GO:0005506 GO:0008199	iron_ion_binding ferric_iron_binding	2.91	1.05	1.37	0.537	-0.0494	3.84	2.01	1.28	0.753	-0.197	0.007	0.406	0.1	0.969	0.97	0	0	0.149	0.751	0.943
57	11617553	TR14168|c0_g1_i2	Overlap	1706	AH018841	12	10034964	10046823	UniRef100_A0A0J8CFS1 Uncharacterized protein n=1 Tax=Beta vulgaris subsp. vulgaris RepID=A0A0J8CFS1_BETVU	0	70.11	UniRef100_UPI00032A54DD PREDICTED: protein trichome birefringence-like 34 n=1 Tax=Cicer arietinum RepID=UPI00032A54DD	0	Bv5_103290_mfcy.t1 cDNAEvidence=100	0	70.11	AT2G38320.1 | Symbols: TBL34 | TRICHOME BIREFRINGENCE-LIKE 34 | chr2:16055488-16057874 FORWARD LENGTH=410	1e-168	63.35	GO:0008150 GO:0010413 GO:0042546 GO:0044036 GO:0045492	biological_process glucuronoxylan_metabolic_process cell_wall_biogenesis cell_wall_macromolecule_metabolic_process xylan_biosynthetic_process			1.66	0.566	0.388	0.954	-0.253	3.57	0.324	1.06	0.955	1.23	0.45	1	0.951	0.826	0.855	0.038	0.945	0.868	0.809	0.368
57	11617553	TR6052|c0_g3_i7	Resistant	1548	AH018962	12	11621615	11626685	UniRef100_A0A0K9QI05 Uncharacterized protein n=1 Tax=Spinacia oleracea RepID=A0A0K9QI05_SPIOL	0	83.74	UniRef100_UPI00057AABFB PREDICTED: uncharacterized protein LOC105122432 isoform X1 n=1 Tax=Populus euphratica RepID=UPI00057AABFB	0	Bv5_111390_aejj.t1 cDNAEvidence=100	0	82.61	AT3G09350.1 | Symbols: Fes1A | Fes1A | chr3:2871216-2873109 FORWARD LENGTH=363	9e-179	69.02	GO:0006457 GO:0009408 GO:0009644 GO:0009651 GO:0042542	protein_folding response_to_heat response_to_high_light_intensity response_to_salt_stress response_to_hydrogen_peroxide	GO:0030544	Hsp70_protein_binding	1.24	0.103	-0.0557	-0.146	1.34	1.26	0.89	-0.296	-0.186	0.855	0.234	1	0.995	1	0.001	0.333	0.12	1	1	0.135
57	11617553	TR6052|c0_g3_i7	Susceptible	1548	AH018962	12	11621615	11626685	UniRef100_A0A0K9QI05 Uncharacterized protein n=1 Tax=Spinacia oleracea RepID=A0A0K9QI05_SPIOL	0	83.74	UniRef100_UPI00057AABFB PREDICTED: uncharacterized protein LOC105122432 isoform X1 n=1 Tax=Populus euphratica RepID=UPI00057AABFB	0	Bv5_111390_aejj.t1 cDNAEvidence=100	0	82.61	AT3G09350.1 | Symbols: Fes1A | Fes1A | chr3:2871216-2873109 FORWARD LENGTH=363	9e-179	69.02	GO:0006457 GO:0009408 GO:0009644 GO:0009651 GO:0042542	protein_folding response_to_heat response_to_high_light_intensity response_to_salt_stress response_to_hydrogen_peroxide	GO:0030544	Hsp70_protein_binding	1.24	0.103	-0.0557	-0.146	1.34	1.26	0.89	-0.296	-0.186	0.855	0.234	1	0.995	1	0.001	0.333	0.12	1	1	0.135
57	11617553	TR30691|c2_g1_i12	Susceptible	1839	AH018960	12	11607317	11614543	UniRef100_A0A0K9RHC1 S-acyltransferase n=1 Tax=Spinacia oleracea RepID=A0A0K9RHC1_SPIOL	2e-121	91.71	UniRef100_A0A0K9RHC1 S-acyltransferase n=1 Tax=Spinacia oleracea RepID=A0A0K9RHC1_SPIOL	2e-121	Bv5_111630_mdef.t1 cDNAEvidence=100	7e-122	87.56	AT3G09320.1 | Symbols: | DHHC-type zinc finger family protein | chr3:2862142-2864113 REVERSE LENGTH=286	6e-93	70.83	GO:0008150	biological_process			-2.14	-0.965	-0.134	-0.505	-0.533	2.31	0.114	1.14	-1.29	2.35	0.325	0.945	0.992	1	0.679	0.396	0.989	0.854	0.658	0.012
57	11617553	TR64527|c0_g3_i3	Susceptible	845	AH018961	12	11615604	11616599	UniRef100_A0A0J8CGC7 Uncharacterized protein n=1 Tax=Beta vulgaris subsp. vulgaris RepID=A0A0J8CGC7_BETVU	1e-45	74.42	UniRef100_A0A0B0NPS3 Chaperone DnaJ n=1 Tax=Gossypium arboreum RepID=A0A0B0NPS3_GOSAR	3e-36	Bv5_111610_gxrx.t1 cDNAEvidence=100	4e-49	74.42	AT5G02160.1 | Symbols: | unknown protein; FUNCTIONS IN: molecular_function unknown; INVOLVED IN: biological_process unknown; LOCATED IN: chloroplast thylakoid membrane; EXPRESSED IN: 23 plant structures; EXPRESSED DURING: 13 growth stages; Has 121 Blast hits to 121 proteins in 17 species: Archae - 0; Bacteria - 0; Metazoa - 0; Fungi - 0; Plants - 121; Viruses - 0; Other Eukaryotes - 0 (source: NC…	3e-33	64.04	GO:0008150 GO:0009965 GO:0030003 GO:0030154 GO:0043085 GO:0045893 GO:0070838	biological_process leaf_morphogenesis cellular_cation_homeostasis cell_differentiation positive_regulation_of_catalytic_activity positive_regulation_of_transcription,_DNA-templated divalent_metal_ion_transport			-0.412	-0.184	-0.00825	0.145	-0.365	0.938	-0.397	0.235	-0.316	1.42	0.829	1	1	1	0.627	0.646	0.838	1	1	0.012
58	18744765	TR6052|c0_g3_i7	Resistant	1548	AH018962	12	11621615	11626685	UniRef100_A0A0K9QI05 Uncharacterized protein n=1 Tax=Spinacia oleracea RepID=A0A0K9QI05_SPIOL	0	83.74	UniRef100_UPI00057AABFB PREDICTED: uncharacterized protein LOC105122432 isoform X1 n=1 Tax=Populus euphratica RepID=UPI00057AABFB	0	Bv5_111390_aejj.t1 cDNAEvidence=100	0	82.61	AT3G09350.1 | Symbols: Fes1A | Fes1A | chr3:2871216-2873109 FORWARD LENGTH=363	9e-179	69.02	GO:0006457 GO:0009408 GO:0009644 GO:0009651 GO:0042542	protein_folding response_to_heat response_to_high_light_intensity response_to_salt_stress response_to_hydrogen_peroxide	GO:0030544	Hsp70_protein_binding	1.24	0.103	-0.0557	-0.146	1.34	1.26	0.89	-0.296	-0.186	0.855	0.234	1	0.995	1	0.001	0.333	0.12	1	1	0.135
58	18744765	TR101461|c2_g1_i2	Resistant	1444	AH019217	12	18708752	18710120	UniRef100_A0A0J8CSW6 Uncharacterized protein n=1 Tax=Beta vulgaris subsp. vulgaris RepID=A0A0J8CSW6_BETVU	6e-39	62.41	UniRef100_UPI000511E6DA PREDICTED: uncharacterized protein LOC103986672 n=1 Tax=Musa acuminata subsp. malaccensis RepID=UPI000511E6DA	3e-19	Bv2_043450_fhqp.t1 cDNAEvidence=100	2e-42	62.41	AT2G25625.2 | Symbols: | unknown protein; FUNCTIONS IN: molecular_function unknown; INVOLVED IN: biological_process unknown; LOCATED IN: chloroplast; EXPRESSED IN: 10 plant structures; EXPRESSED DURING: LP.06 six leaves visible, LP.04 four leaves visible, 4 anthesis, petal differentiation and expansion stage; Has 24 Blast hits to 24 proteins in 9 species: Archae - 0; Bacteria - 0; Metazoa - 0; Fu…	1e-16	41.28	GO:0008150	biological_process	GO:0003674	molecular_function	3.7	0.782	0.419	1.7	0.804	0.805	0.827	0.243	0.383	-0.647	0.03	0.992	0.938	0.244	0.494	0.845	0.739	1	1	0.801
58	18744765	TR80068|c1_g1_i4	Susceptible	1474	AH019218	12	18737847	18743998	UniRef100_A0A0K9RF58 Uncharacterized protein n=1 Tax=Spinacia oleracea RepID=A0A0K9RF58_SPIOL	0	82.85	UniRef100_Q8S8Z1 Protein phosphatase 2C n=1 Tax=Mesembryanthemum crystallinum RepID=Q8S8Z1_MESCR	0	Bv2_043440_wnhq.t1 cDNAEvidence=100	0	82.93	AT2G25620.1 | Symbols: AtDBP1, DBP1 | DNA-binding protein phosphatase 1 | chr2:10903154-10904978 REVERSE LENGTH=392	0	69.46	GO:0050688	regulation_of_defense_response_to_virus	GO:0004722	protein_serine/threonine_phosphatase_activity	-1.31	-0.112	-0.278	0.15	-1.06	-0.25	-0.335	0.018	0.103	-0.0366	0.041	1	0.823	1	0.001	0.879	0.657	1	1	0.99
58	18744765	TR12572|c0_g2_i4	Susceptible	1106	AH019221	12	18751163	18752065	UniRef100_A0A0J8CCC3 Xyloglucan endotransglucosylase/hydrolase n=1 Tax=Beta vulgaris subsp. vulgaris RepID=A0A0J8CCC3_BETVU	1e-154	85.11	UniRef100_A0A0J8CCC3 Xyloglucan endotransglucosylase/hydrolase n=1 Tax=Beta vulgaris subsp. vulgaris RepID=A0A0J8CCC3_BETVU	1e-154	Bv5_110620_yqwe.t1 cDNAEvidence=100	5e-158	85.11	AT4G25810.1 | Symbols: XTR6, XTH23 | xyloglucan endotransglycosylase 6 | chr4:13128694-13129715 FORWARD LENGTH=286	3e-136	75.49			GO:0016798	hydrolase_activity,_acting_on_glycosyl_bonds	1.49	0.958	0.503	0.353	-0.324	3.14	-0.412	1.34	0.314	1.9	0.452	0.83	0.903	1	0.784	0.076	0.904	0.589	1	0.029
59	20945577	TR104059|c3_g1_i1	Resistant	2940	AH019223	12	18781297	18788657	UniRef100_A0A0J8CTE6 Uncharacterized protein n=1 Tax=Beta vulgaris subsp. vulgaris RepID=A0A0J8CTE6_BETVU	0	83.15	UniRef100_A0A061GNG0 Pleiotropic drug resistance 12 n=1 Tax=Theobroma cacao RepID=A0A061GNG0_THECC	0	Bv2_043420_qkgm.t1 cDNAEvidence=100	0	83.15	AT1G15520.1 | Symbols: PDR12, ATPDR12, ABCG40, ATABCG40 | pleiotropic drug resistance 12 | chr1:5331993-5338175 REVERSE LENGTH=1423	0	63.5	GO:0000165 GO:0006612 GO:0006855 GO:0007165 GO:0009414 GO:0009595 GO:0009697 GO:0009723 GO:0009733 GO:0009737 GO:0009738 GO:0009751 GO:0009753 GO:0009862 GO:0009867 GO:0010193 GO:0010200 GO:0010310 GO:0010363 GO:0015692 GO:0031348 GO:0042538 GO:0042742 GO:0043069 GO:0043900 GO:0046865 GO:0050832 GO:0080168	MAPK_cascade protein_targeting_to_membrane drug_transmembrane_transport signal_transduction response_to_water_deprivation detection_of_biotic_stimulus salicylic_acid_biosynthetic_process response_to_ethylene response_to_auxin response_to_abscisic_acid abscisic_acid-activated_signaling_pathway response_to_salicylic_acid response_to_jasmonic_acid systemic_acquired_resistance,_salicylic_acid_mediate…	GO:0042626	ATPase_activity,_coupled_to_transmembrane_movement_of_substances	4.92	2.12	0.797	3.04	-1.04	5.36	0.678	2.73	1.8	0.145	0.081	0.424	0.899	0.094	0.627	0.026	0.889	0.114	0.539	0.99
59	20945577	TR15453|c3_g1_i4	Resistant	1553	AH019315	12	20924687	20929205	UniRef100_A0A0K9RAE3 Uncharacterized protein n=1 Tax=Spinacia oleracea RepID=A0A0K9RAE3_SPIOL	3e-116	77.18	UniRef100_UPI000510D5D2 PREDICTED: uncharacterized protein LOC103946190 isoform X1 n=1 Tax=Pyrus x bretschneideri RepID=UPI000510D5D2	1e-84	Bv2_038460_rzad.t1 cDNAEvidence=90.5	5e-112	80.91	No informative hit E<10-6	NA	NA	NA	NA	NA	NA	3.67	1.53	0.518	0.43	1.19	1.07	0.312	0.0706	0.288	0.399	0.001	0.088	0.824	1	0.114	0.635	0.916	1	1	0.875
59	20945577	TR34442|c0_g2_i2	Resistant	1472	AH019316	12	20932699	20941377	UniRef100_A0A0J8CTH0 Uncharacterized protein n=1 Tax=Beta vulgaris subsp. vulgaris RepID=A0A0J8CTH0_BETVU	0	76.72	UniRef100_UPI0001BE41E5 PREDICTED: 11-oxo-beta-amyrin 30-oxidase isoform X2 n=1 Tax=Vitis vinifera RepID=UPI0001BE41E5	3e-114	Bv2_042310_qchu.t1 cDNAEvidence=100	0	76.72	No informative hit E<10-6	NA	NA	NA	NA	NA	NA	-3.63	-0.615	-1.18	-0.389	-1.45	0.0669	0.459	-0.193	-0.0657	-0.133	0.028	1	0.545	1	0.164	1	0.878	1	1	0.979
59	20945577	TR2053|c0_g2_i1	Resistant	1311	AH019320	12	20944874	20945185	UniRef100_Q5U695 Orf174 protein n=1 Tax=Beta vulgaris subsp. vulgaris RepID=Q5U695_BETVU	1e-85	89.47	UniRef100_Q5U695 Orf174 protein n=1 Tax=Beta vulgaris subsp. vulgaris RepID=Q5U695_BETVU	1e-85	Bv_017070_mczs.t1 cDNAEvidence=100	1e-13	89.19	No informative hit E<10-6	NA	NA	NA	NA	NA	NA	3.13	0.781	0.997	-0.0281	1.38	0.966	0.443	-0.849	0.717	0.654	0.003	0.846	0.432	1	0.01	0.662	0.836	0.735	0.781	0.6
60	15222767	TR98190|c0_g1_i3	Resistant	1359	AH019323	13	20980046	20980897	UniRef100_A0A0J8CYP0 Uncharacterized protein n=1 Tax=Beta vulgaris subsp. vulgaris RepID=A0A0J8CYP0_BETVU	0	78.93	UniRef100_UPI0005C9551C PREDICTED: probable carboxylesterase 15 n=1 Tax=Fragaria vesca subsp. vesca RepID=UPI0005C9551C	8e-150	Bv2_042200_uecx.t1 cDNAEvidence=100	0	78.93	AT5G16080.1 | Symbols: AtCXE17, CXE17 | carboxyesterase 17 | chr5:5252533-5253567 REVERSE LENGTH=344	7e-45	31.44					8.04	1.3	3.59	1.93	1.22	4.12	0.0309	0.399	1.99	1.71	0.011	1	0.246	0.877	0.528	0.396	1	1	0.808	0.635
60	15222767	TR22972|c0_g1_i9	Susceptible	818	AH020053	13	15215781	15220375	UniRef100_A0A0D2USP7 Uncharacterized protein n=2 Tax=Gossypium raimondii RepID=A0A0D2USP7_GOSRA	6e-73	71.62	UniRef100_UPI0004E59667 PREDICTED: 54S ribosomal protein L51, mitochondrial n=1 Tax=Phoenix dactylifera RepID=UPI0004E59667	1e-70	Bv3_058450_fgoy.t1 cDNAEvidence=100	2e-72	84.87	AT3G59650.1 | Symbols: | mitochondrial ribosomal protein L51/S25/CI-B8 family protein | chr3:22033216-22033928 FORWARD LENGTH=119	2e-69	83.19	GO:0008150	biological_process	GO:0003674	molecular_function	1.68	0.267	0.00222	0.418	0.996	3.19	0.989	0.383	0.604	1.21	0.286	1	1	1	0.194	0.019	0.43	1	0.979	0.259
60	15222767	TR22972|c0_g1_i9	Susceptible	818	AH020053	13	15215781	15220375	UniRef100_A0A0D2USP7 Uncharacterized protein n=2 Tax=Gossypium raimondii RepID=A0A0D2USP7_GOSRA	6e-73	71.62	UniRef100_UPI0004E59667 PREDICTED: 54S ribosomal protein L51, mitochondrial n=1 Tax=Phoenix dactylifera RepID=UPI0004E59667	1e-70	Bv3_058450_fgoy.t1 cDNAEvidence=100	2e-72	84.87	AT3G59650.1 | Symbols: | mitochondrial ribosomal protein L51/S25/CI-B8 family protein | chr3:22033216-22033928 FORWARD LENGTH=119	2e-69	83.19	GO:0008150	biological_process	GO:0003674	molecular_function	1.68	0.267	0.00222	0.418	0.996	3.19	0.989	0.383	0.604	1.21	0.286	1	1	1	0.194	0.019	0.43	1	0.979	0.259
60	15222767	TR37570|c2_g1_i8	Susceptible	1287	AH020056	13	15251001	15256287	UniRef100_UPI00053F5539 PREDICTED: uncharacterized protein LOC104888989 isoform X2 n=1 Tax=Beta vulgaris subsp. vulgaris RepID=UPI00053F5539	2e-130	76.68	UniRef100_UPI00053F5539 PREDICTED: uncharacterized protein LOC104888989 isoform X2 n=1 Tax=Beta vulgaris subsp. vulgaris RepID=UPI00053F5539	2e-130	Bv3_058470_udfs.t1 cDNAEvidence=100	1e-133	76.68	AT2G02960.3 | Symbols: | RING/FYVE/PHD zinc finger superfamily protein | chr2:862346-863980 REVERSE LENGTH=271	2e-37	43.65			GO:0008270	zinc_ion_binding	-0.552	-0.354	-0.138	-0.44	0.381	3.08	0.777	1.31	-0.0486	1.04	0.776	1	0.981	1	0.636	0.003	0.548	0.11	1	0.216
61	17742114	TR9911|c1_g1_i6	Overlap	561	AH020290	13	17760340	17763697	UniRef100_A0A0J8BFI2 Uncharacterized protein n=1 Tax=Beta vulgaris subsp. vulgaris RepID=A0A0J8BFI2_BETVU	6e-53	93.33	UniRef100_UPI000510AFFC PREDICTED: serine/arginine-rich SC35-like splicing factor SCL33 n=1 Tax=Pyrus x bretschneideri RepID=UPI000510AFFC	4e-52	Bv3_068590_pruc.t1 cDNAEvidence=100	2e-56	93.33	AT3G13570.1 | Symbols: SCL30A, At-SCL30A | SC35-like splicing factor 30A | chr3:4429564-4431602 REVERSE LENGTH=262	1e-51	83.33	GO:0000398 GO:0006355 GO:0008380 GO:0030422 GO:0035196 GO:0043687 GO:0045893	mRNA_splicing,_via_spliceosome regulation_of_transcription,_DNA-templated RNA_splicing production_of_siRNA_involved_in_RNA_interference production_of_miRNAs_involved_in_gene_silencing_by_miRNA post-translational_protein_modification positive_regulation_of_transcription,_DNA-templated	GO:0003723	RNA_binding	2.3	0.74	0.399	0.693	0.469	2.5	0.712	0.678	0.717	0.399	0.022	0.643	0.865	0.774	0.459	0.007	0.369	0.843	0.679	0.764
61	17742114	TR109823|c0_g1_i1	Resistant	962	AH020280	13	17699736	17704245	UniRef100_A0A0K9R7M3 Uncharacterized protein n=1 Tax=Spinacia oleracea RepID=A0A0K9R7M3_SPIOL	8e-132	91	UniRef100_UPI00058136BE PREDICTED: mitochondrial dicarboxylate/tricarboxylate transporter DTC n=1 Tax=Sesamum indicum RepID=UPI00058136BE	7e-130	Bv3_068440_nthw.t1 cDNAEvidence=100	4e-134	89.57	AT5G19760.1 | Symbols: | Mitochondrial substrate carrier family protein | chr5:6679591-6681845 REVERSE LENGTH=298	7e-124	83.81	GO:0006007 GO:0006096 GO:0006810 GO:0006835 GO:0006839 GO:0009060 GO:0035674 GO:0046686	glucose_catabolic_process glycolytic_process transport dicarboxylic_acid_transport mitochondrial_transport aerobic_respiration tricarboxylic_acid_transmembrane_transport response_to_cadmium_ion	GO:0005310 GO:0015142 GO:0017077	dicarboxylic_acid_transmembrane_transporter_activity tricarboxylic_acid_transmembrane_transporter_activity oxidative_phosphorylation_uncoupler_activity	-1.2	0.0926	-0.325	0.0948	-1.06	-0.366	-0.35	0.166	-0.00132	-0.18	0.131	1	0.817	1	0.003	0.831	0.727	1	1	0.902
61	17742114	TR17202|c0_g1_i8	Resistant	875	AH020288	13	17748038	17751190	UniRef100_A0A0J8BPU1 Molybdopterin synthase sulfur carrier subunit n=1 Tax=Beta vulgaris subsp. vulgaris RepID=A0A0J8BPU1_BETVU	4e-51	83.33	UniRef100_A0A0J8BPU1 Molybdopterin synthase sulfur carrier subunit n=1 Tax=Beta vulgaris subsp. vulgaris RepID=A0A0J8BPU1_BETVU	4e-51	Bv8_191340_aaqn.t1 cDNAEvidence=80	2e-54	83.33	AT4G10100.3 | Symbols: CNX7, SIR5 | co-factor for nitrate, reductase and xanthine dehydrogenase 7 | chr4:6309091-6309381 FORWARD LENGTH=96	1e-35	65.91	GO:0006777 GO:0006790 GO:0009734 GO:0018315	Mo-molybdopterin_cofactor_biosynthetic_process sulfur_compound_metabolic_process auxin-activated_signaling_pathway molybdenum_incorporation_into_molybdenum-molybdopterin_complex	GO:0003824	catalytic_activity	1.19	0.876	-0.159	-1.53	2	0.283	-0.0635	-0.00443	0.239	0.112	0.637	0.981	0.989	0.416	0.026	0.964	0.996	1	1	0.987
61	17742114	TR9911|c1_g1_i6	Resistant	561	AH020290	13	17760340	17763697	UniRef100_A0A0J8BFI2 Uncharacterized protein n=1 Tax=Beta vulgaris subsp. vulgaris RepID=A0A0J8BFI2_BETVU	6e-53	93.33	UniRef100_UPI000510AFFC PREDICTED: serine/arginine-rich SC35-like splicing factor SCL33 n=1 Tax=Pyrus x bretschneideri RepID=UPI000510AFFC	4e-52	Bv3_068590_pruc.t1 cDNAEvidence=100	2e-56	93.33	AT3G13570.1 | Symbols: SCL30A, At-SCL30A | SC35-like splicing factor 30A | chr3:4429564-4431602 REVERSE LENGTH=262	1e-51	83.33	GO:0000398 GO:0006355 GO:0008380 GO:0030422 GO:0035196 GO:0043687 GO:0045893	mRNA_splicing,_via_spliceosome regulation_of_transcription,_DNA-templated RNA_splicing production_of_siRNA_involved_in_RNA_interference production_of_miRNAs_involved_in_gene_silencing_by_miRNA post-translational_protein_modification positive_regulation_of_transcription,_DNA-templated	GO:0003723	RNA_binding	2.3	0.74	0.399	0.693	0.469	2.5	0.712	0.678	0.717	0.399	0.022	0.643	0.865	0.774	0.459	0.007	0.369	0.843	0.679	0.764
62	18608339	TR40877|c1_g2_i9	Resistant	1591	AH020380	13	18601800	18606990	UniRef100_A0A0J8C9U3 Uncharacterized protein n=1 Tax=Beta vulgaris subsp. vulgaris RepID=A0A0J8C9U3_BETVU	9e-120	54.14	UniRef100_A0A0B0MBT7 Hyoscyamine 6-dioxygenase n=1 Tax=Gossypium arboreum RepID=A0A0B0MBT7_GOSAR	7e-108	Bv5_121020_znma.t1 cDNAEvidence=100	3e-123	54.14	AT4G10490.1 | Symbols: | 2-oxoglutarate (2OG) and Fe(II)-dependent oxygenase superfamily protein | chr4:6483900-6485179 FORWARD LENGTH=348	2e-69	41.94	GO:0019748	secondary_metabolic_process	GO:0016706	oxidoreductase_activity,_acting_on_paired_donors,_with_incorporation_or_reduction_of_molecular_oxygen,_2-oxoglutarate_as_one_donor,_and_incorporation_of_one_atom_each_of_oxygen_into_both_donors	-4.61	-1.33	0.554	-0.258	-3.58	-2.71	-1	-1.89	0.154	0.0244	0.168	1	0.961	1	0.032	0.616	0.86	0.868	1	1
62	18608339	TR30842|c4_g1_i1	Resistant	2632	AH020381	13	18614099	18616002	UniRef100_A0A0K9QX17 Uncharacterized protein (Fragment) n=1 Tax=Spinacia oleracea RepID=A0A0K9QX17_SPIOL	8e-87	60.55	UniRef100_UPI0005400C7C PREDICTED: shikimate O-hydroxycinnamoyltransferase-like isoform X2 n=1 Tax=Beta vulgaris subsp. vulgaris RepID=UPI0005400C7C	3e-63	Bv6_147850_ictj.t1 cDNAEvidence=33.3	3e-73	52.63	AT5G48930.1 | Symbols: HCT | hydroxycinnamoyl-CoA shikimate/quinate hydroxycinnamoyl transferase | chr5:19836654-19838092 REVERSE LENGTH=433	2e-52	45.5	GO:0006612 GO:0009611 GO:0009805 GO:0009809 GO:0009963 GO:0010252 GO:0010363	protein_targeting_to_membrane response_to_wounding coumarin_biosynthetic_process lignin_biosynthetic_process positive_regulation_of_flavonoid_biosynthetic_process auxin_homeostasis regulation_of_plant-type_hypersensitive_response	GO:0005515 GO:0016740 GO:0047172 GO:0047205	protein_binding transferase_activity shikimate_O-hydroxycinnamoyltransferase_activity quinate_O-hydroxycinnamoyltransferase_activity	-3.4	-0.722	0.647	-0.631	-2.69	-4.12	-0.386	-2.42	-1.03	-0.281	0.221	1	0.929	1	0.041	0.179	0.957	0.372	0.998	0.967
62	18608339	TR18033|c3_g4_i3	Resistant	1654	AH020383	13	18630669	18636244	UniRef100_A0A0J8CXN6 Uncharacterized protein n=1 Tax=Beta vulgaris subsp. vulgaris RepID=A0A0J8CXN6_BETVU	2e-151	76.13	UniRef100_UPI00053C0C95 PREDICTED: ATPase family AAA domain-containing protein 3-like n=1 Tax=Tarenaya hassleriana RepID=UPI00053C0C95	2e-149	Bv3_049870_ysjd.t1 cDNAEvidence=100	7e-155	76.13	AT5G16930.1 | Symbols: | AAA-type ATPase family protein | chr5:5568578-5571565 FORWARD LENGTH=644	4e-150	73.13			GO:0016887	ATPase_activity	-2.94	-0.333	-0.688	-0.358	-1.56	1.27	-0.534	0.687	0.757	0.364	0.033	1	0.603	1	0.163	0.533	0.704	0.769	0.866	0.9
62	18608339	TR30423|c2_g1_i2	Susceptible	3657	AH020378	13	18586787	18588895	UniRef100_A0A0J8CTP7 Serine/threonine-protein kinase n=1 Tax=Beta vulgaris subsp. vulgaris RepID=A0A0J8CTP7_BETVU	0	79.64	UniRef100_A0A0J8CTP7 Serine/threonine-protein kinase n=1 Tax=Beta vulgaris subsp. vulgaris RepID=A0A0J8CTP7_BETVU	0	Bv3_061340_xzag.t1 cDNAEvidence=80	0	79.64	AT2G41890.1 | Symbols: | curculin-like (mannose-binding) lectin family protein / PAN domain-containing protein | chr2:17478058-17480352 REVERSE LENGTH=764	0	51.62	GO:0007389 GO:0048438 GO:0048439	pattern_specification_process floral_whorl_development flower_morphogenesis	GO:0030246	carbohydrate_binding	-0.882	0.0169	-0.152	-0.305	-0.441	-1.79	-0.00421	-0.612	-0.69	-0.485	0.353	1	0.96	0.998	0.379	0.023	1	0.69	0.316	0.567
63	20265657	TR21674|c2_g1_i2	Overlap	1597	AH020556	13	20254236	20264328	UniRef100_M5XCB6 Uncharacterized protein n=1 Tax=Prunus persica RepID=M5XCB6_PRUPE	0	80.91	UniRef100_UPI00046E2733 PREDICTED: 70 kDa peptidyl-prolyl isomerase-like n=1 Tax=Prunus mume RepID=UPI00046E2733	0	Bv7_168220_tqgd.t1 cDNAEvidence=100	0	77.1	AT3G25230.1 | Symbols: ROF1, ATFKBP62, FKBP62 | rotamase FKBP 1 | chr3:9188257-9191137 FORWARD LENGTH=551	0	75.76	GO:0000413 GO:0006457 GO:0006499 GO:0006970 GO:0009408 GO:0009611 GO:0009644 GO:0009735 GO:0009845 GO:0018208 GO:0034976 GO:0042542 GO:0046686 GO:0070370	protein_peptidyl-prolyl_isomerization protein_folding N-terminal_protein_myristoylation response_to_osmotic_stress response_to_heat response_to_wounding response_to_high_light_intensity response_to_cytokinin seed_germination peptidyl-proline_modification response_to_endoplasmic_reticulum_stress response_to_hydrogen_peroxide response_to_cadmium_ion cellular_heat_acclimation	GO:0003755 GO:0005515 GO:0005516 GO:0005528 GO:0032266 GO:0080025	peptidyl-prolyl_cis-trans_isomerase_activity protein_binding calmodulin_binding FK506_binding phosphatidylinositol-3-phosphate_binding phosphatidylinositol-3,5-bisphosphate_binding	5.67	2.02	0.59	0.624	2.44	6.96	4.15	-0.189	0.142	2.87	0.002	0.193	0.92	1	0.024	0	0	1	1	0.002
63	20265657	TR28314|c2_g1_i6	Resistant	3947	AH020555	13	20237338	20248247	UniRef100_A0A0K9RFY5 Uncharacterized protein n=1 Tax=Spinacia oleracea RepID=A0A0K9RFY5_SPIOL	0	88.31	UniRef100_UPI000526AF66 PREDICTED: LOW QUALITY PROTEIN: probable UDP-N-acetylglucosamine--peptide N-acetylglucosaminyltransferase SEC n=1 Tax=Eucalyptus grandis RepID=UPI000526AF66	0	Bv3_065310_ngym.t1 cDNAEvidence=100	0	87.42	AT3G04240.1 | Symbols: SEC | Tetratricopeptide repeat (TPR)-like superfamily protein | chr3:1114187-1120722 REVERSE LENGTH=977	0	77.55	GO:0006493	protein_O-linked_glycosylation	GO:0016757	transferase_activity,_transferring_glycosyl_groups	-1.56	-0.216	-0.57	0.0349	-0.813	-0.611	-0.104	-0.00876	-0.313	-0.186	0.023	1	0.439	1	0.023	0.625	0.961	1	0.978	0.886
63	20265657	TR15385|c0_g1_i4	Resistant	370	AH020558	13	20277407	20280043	UniRef100_A0A0J8CRX9 Xyloglucan endotransglucosylase/hydrolase n=1 Tax=Beta vulgaris subsp. vulgaris RepID=A0A0J8CRX9_BETVU	2e-59	83.76	UniRef100_A0A0J8CRX9 Xyloglucan endotransglucosylase/hydrolase n=1 Tax=Beta vulgaris subsp. vulgaris RepID=A0A0J8CRX9_BETVU	2e-59	Bv3_065250_doxn.t1 cDNAEvidence=100	7e-63	83.76	AT3G23730.1 | Symbols: XTH16 | xyloglucan endotransglucosylase/hydrolase 16 | chr3:8550222-8551248 FORWARD LENGTH=291	2e-45	75			GO:0016798	hydrolase_activity,_acting_on_glycosyl_bonds	-2.26	0.133	0.142	-0.942	-1.59	-1.75	-1.06	0.0672	-0.777	0.024	0.052	1	0.98	0.47	0.004	0.255	0.191	1	0.722	1
63	20265657	TR21674|c2_g1_i2	Susceptible	1597	AH020556	13	20254236	20264328	UniRef100_M5XCB6 Uncharacterized protein n=1 Tax=Prunus persica RepID=M5XCB6_PRUPE	0	80.91	UniRef100_UPI00046E2733 PREDICTED: 70 kDa peptidyl-prolyl isomerase-like n=1 Tax=Prunus mume RepID=UPI00046E2733	0	Bv7_168220_tqgd.t1 cDNAEvidence=100	0	77.1	AT3G25230.1 | Symbols: ROF1, ATFKBP62, FKBP62 | rotamase FKBP 1 | chr3:9188257-9191137 FORWARD LENGTH=551	0	75.76	GO:0000413 GO:0006457 GO:0006499 GO:0006970 GO:0009408 GO:0009611 GO:0009644 GO:0009735 GO:0009845 GO:0018208 GO:0034976 GO:0042542 GO:0046686 GO:0070370	protein_peptidyl-prolyl_isomerization protein_folding N-terminal_protein_myristoylation response_to_osmotic_stress response_to_heat response_to_wounding response_to_high_light_intensity response_to_cytokinin seed_germination peptidyl-proline_modification response_to_endoplasmic_reticulum_stress response_to_hydrogen_peroxide response_to_cadmium_ion cellular_heat_acclimation	GO:0003755 GO:0005515 GO:0005516 GO:0005528 GO:0032266 GO:0080025	peptidyl-prolyl_cis-trans_isomerase_activity protein_binding calmodulin_binding FK506_binding phosphatidylinositol-3-phosphate_binding phosphatidylinositol-3,5-bisphosphate_binding	5.67	2.02	0.59	0.624	2.44	6.96	4.15	-0.189	0.142	2.87	0.002	0.193	0.92	1	0.024	0	0	1	1	0.002
63	20265657	TR96083|c2_g1_i8	Susceptible	755	AH020562	13	20305070	20306541	UniRef100_A0A0J8CSK6 Xyloglucan endotransglucosylase/hydrolase n=1 Tax=Beta vulgaris subsp. vulgaris RepID=A0A0J8CSK6_BETVU	1e-81	81.56	UniRef100_A0A0J8CSK6 Xyloglucan endotransglucosylase/hydrolase n=1 Tax=Beta vulgaris subsp. vulgaris RepID=A0A0J8CSK6_BETVU	1e-81	Bv3_065230_efuk.t1 cDNAEvidence=100	5e-85	81.56	AT4G30270.1 | Symbols: MERI5B, MERI-5, XTH24, SEN4 | xyloglucan endotransglucosylase/hydrolase 24 | chr4:14819445-14820448 REVERSE LENGTH=269	4e-65	65.96	GO:0007568 GO:0009739 GO:0009740 GO:0009741 GO:0009828	aging response_to_gibberellin gibberellic_acid_mediated_signaling_pathway response_to_brassinosteroid plant-type_cell_wall_loosening	GO:0016762 GO:0016798	xyloglucan:xyloglucosyl_transferase_activity hydrolase_activity,_acting_on_glycosyl_bonds	-0.424	0.257	0.84	-0.738	-0.783	5.5	-0.00994	0.946	2.81	1.75	0.914	1	0.826	1	0.468	0.01	1	0.989	0.014	0.218
64	20420543	TR74085|c3_g2_i2	Overlap	971	AH020584	13	20449721	20455627	UniRef100_UPI00057A2985 PREDICTED: chaperonin 60 subunit beta 2, chloroplastic n=1 Tax=Populus euphratica RepID=UPI00057A2985	5e-127	92.59	UniRef100_UPI00057A2985 PREDICTED: chaperonin 60 subunit beta 2, chloroplastic n=1 Tax=Populus euphratica RepID=UPI00057A2985	5e-127	Bv3_055040_usdd.t1 cDNAEvidence=100	5e-129	93.52	AT3G13470.1 | Symbols: | TCP-1/cpn60 chaperonin family protein | chr3:4389685-4392624 FORWARD LENGTH=596	4e-125	90.28	GO:0009658 GO:0048481	chloroplast_organization ovule_development			1.89	1.02	0.175	0.228	0.473	2.34	0.874	0.447	0.315	0.706	0.012	0.035	0.947	1	0.309	0	0.052	0.911	1	0.194
64	20420543	TR1868|c1_g1_i1	Resistant	2915	AH020577	13	20410814	20411966	UniRef100_UPI0005401A31 PREDICTED: glutamic acid-rich protein isoform X2 n=1 Tax=Beta vulgaris subsp. vulgaris RepID=UPI0005401A31	3e-29	61.22	UniRef100_UPI0005401A31 PREDICTED: glutamic acid-rich protein isoform X2 n=1 Tax=Beta vulgaris subsp. vulgaris RepID=UPI0005401A31	3e-29	Bv3_065560_krms.t1 cDNAEvidence=100	1e-29	52.94	No informative hit E<10-6	NA	NA	NA	NA	NA	NA	0.173	-0.254	-0.788	-0.234	1.45	-0.832	-0.089	-0.27	-0.0532	-0.42	0.959	1	0.684	1	0.043	0.75	0.986	1	1	0.856
64	20420543	TR39394|c0_g1_i4	Resistant	1143	AH020579	13	20421445	20424078	UniRef100_A0A0K9R3H6 Uncharacterized protein n=1 Tax=Spinacia oleracea RepID=A0A0K9R3H6_SPIOL	3e-84	79.75	UniRef100_UPI0002C34115 PREDICTED: chaperone protein dnaJ 20, chloroplastic-like n=1 Tax=Fragaria vesca subsp. vesca RepID=UPI0002C34115	8e-62	Bv3_065580_ihyi.t1 cDNAEvidence=100	1e-84	81.05	AT4G13830.2 | Symbols: J20 | DNAJ-like 20 | chr4:8011518-8012577 FORWARD LENGTH=197	2e-56	60.26	GO:0006457 GO:0010322 GO:0015996 GO:0061077 GO:1902395	protein_folding regulation_of_isopentenyl_diphosphate_biosynthetic_process,_methylerythritol_4-phosphate_pathway chlorophyll_catabolic_process chaperone-mediated_protein_folding regulation_of_1-deoxy-D-xylulose-5-phosphate_synthase_activity	GO:0005515	protein_binding	1.5	0.376	-0.101	0.0541	1.17	0.942	0.482	0.0459	-0.333	0.747	0.237	1	0.988	1	0.037	0.648	0.791	1	1	0.476
64	20420543	TR30089|c2_g2_i6	Susceptible	331	AH020576	13	20400192	20402019	UniRef100_A0A0K9RGY9 Uncharacterized protein n=1 Tax=Spinacia oleracea RepID=A0A0K9RGY9_SPIOL	2e-35	68.24	UniRef100_D6PZY8 RNA-binding glycine-rich protein n=4 Tax=Nicotiana RepID=D6PZY8_TOBAC	1e-30	Bv3_065550_whqs.t1 cDNAEvidence=100	2e-31	67.07	AT4G13850.4 | Symbols: ATGRP2 | glycine-rich RNA-binding protein 2 | chr4:8021314-8022065 FORWARD LENGTH=129	4e-28	54.12	GO:0006364 GO:0006970 GO:0009409 GO:0009414 GO:0009631 GO:0009651 GO:0009845 GO:0031564	rRNA_processing response_to_osmotic_stress response_to_cold response_to_water_deprivation cold_acclimation response_to_salt_stress seed_germination transcription_antitermination	GO:0001072 GO:0003690 GO:0003697 GO:0003723 GO:0005507 GO:0005524	RNA_binding_transcription_antitermination_factor_activity double-stranded_DNA_binding single-stranded_DNA_binding RNA_binding copper_ion_binding ATP_binding	0.704	-0.0801	0.487	-0.323	0.62	4.35	1.67	1.82	0.423	0.431	0.727	1	0.857	1	0.48	0	0.023	0.02	1	0.875
65	12028630	TR28552|c2_g5_i1	Resistant	580	AH020964	14	12003193	12014911	UniRef100_A0A0J8EK02 Plasma membrane ATPase n=2 Tax=Mesangiospermae RepID=A0A0J8EK02_BETVU	1e-109	96.37	UniRef100_A0A0J8EK02 Plasma membrane ATPase n=2 Tax=Mesangiospermae RepID=A0A0J8EK02_BETVU	1e-109	Bv8_198370_pqfr.t1 cDNAEvidence=100	6e-113	96.37	AT4G30190.1 | Symbols: AHA2, PMA2, HA2 | H(+)-ATPase 2 | chr4:14770820-14775920 REVERSE LENGTH=948	2e-104	89.64	GO:0006857 GO:0006865 GO:0006888 GO:0010167 GO:0015706 GO:0015991 GO:0043090 GO:0052541 GO:0052546	oligopeptide_transport amino_acid_transport ER_to_Golgi_vesicle-mediated_transport response_to_nitrate nitrate_transport ATP_hydrolysis_coupled_proton_transport amino_acid_import plant-type_cell_wall_cellulose_metabolic_process cell_wall_pectin_metabolic_process	GO:0000287 GO:0005515 GO:0008553 GO:0016887	magnesium_ion_binding protein_binding hydrogen-exporting_ATPase_activity,_phosphorylative_mechanism ATPase_activity	-0.903	-0.115	0.035	0.057	-0.88	0.38	0.219	-0.0246	0.171	0.0136	0.261	1	0.997	1	0.024	0.8	0.86	1	1	1
65	12028630	TR28395|c0_g1_i1	Resistant	1074	AH020965	14	12016492	12019816	UniRef100_A0A0J8BPV7 Uncharacterized protein n=1 Tax=Beta vulgaris subsp. vulgaris RepID=A0A0J8BPV7_BETVU	2e-55	80.34	UniRef100_UPI00057B550C PREDICTED: uncharacterized protein LOC105142816 isoform X1 n=1 Tax=Populus euphratica RepID=UPI00057B550C	8e-32	Bv8_198380_ihoy.t1 cDNAEvidence=100	6e-59	80.34	AT5G57345.1 | Symbols: | unknown protein; Has 30201 Blast hits to 17322 proteins in 780 species: Archae - 12; Bacteria - 1396; Metazoa - 17338; Fungi - 3422; Plants - 5037; Viruses - 0; Other Eukaryotes - 2996 (source: NCBI BLink). | chr5:23229562-23230587 REVERSE LENGTH=188	3e-26	58.91	GO:0008150 GO:0030003 GO:0070838	biological_process cellular_cation_homeostasis divalent_metal_ion_transport	GO:0003674	molecular_function	-0.652	0.359	-0.012	-1.76	0.763	0.424	0.485	0.253	-0.0122	-0.303	0.698	1	1	0.007	0.226	0.886	0.774	1	1	0.885
65	12028630	TR41660|c4_g1_i2	Resistant	1592	AH020966	14	12034821	12044078	UniRef100_A0A0J8BPG2 Uncharacterized protein n=1 Tax=Beta vulgaris subsp. vulgaris RepID=A0A0J8BPG2_BETVU	0	92.05	UniRef100_Q6UEI5 ZEITLUPE n=1 Tax=Mesembryanthemum crystallinum RepID=Q6UEI5_MESCR	0	Bv8_198410_uhfk.t1 cDNAEvidence=100	0	92.05	AT5G57360.1 | Symbols: ZTL, LKP1, ADO1, FKL2 | Galactose oxidase/kelch repeat superfamily protein | chr5:23241597-23244256 FORWARD LENGTH=609	0	80.72	GO:0006511 GO:0006635 GO:0007623 GO:0009639 GO:0009908 GO:0010114 GO:0010498 GO:0016558 GO:0031146 GO:0042752 GO:0043153 GO:0044265	ubiquitin-dependent_protein_catabolic_process fatty_acid_beta-oxidation circadian_rhythm response_to_red_or_far_red_light flower_development response_to_red_light proteasomal_protein_catabolic_process protein_import_into_peroxisome_matrix SCF-dependent_proteasomal_ubiquitin-dependent_protein_catabolic_process regulation_of_circadian_rhythm entrainment_of_circadian_clock_by_photoperiod cellular_ma…	GO:0004842 GO:0005515 GO:0009882	ubiquitin-protein_transferase_activity protein_binding blue_light_photoreceptor_activity	-1.8	-0.518	-0.277	0.18	-1.18	-0.0401	-0.0539	0.117	-0.199	0.0961	0.07	0.898	0.901	1	0.045	1	0.99	1	1	0.976
65	12028630	TR7614|c2_g4_i1	Resistant	1914	AH020967	14	12060015	12068000	UniRef100_D7UAP6 Putative uncharacterized protein n=1 Tax=Vitis vinifera RepID=D7UAP6_VITVI	7e-86	57.04	UniRef100_UPI00052EF1E6 PREDICTED: probable amino acid permease 7 n=1 Tax=Nelumbo nucifera RepID=UPI00052EF1E6	1e-81	Bv4_091160_zfua.t1 cDNAEvidence=100	3e-74	47.17	AT5G09220.1 | Symbols: AAP2 | amino acid permease 2 | chr5:2866867-2868863 FORWARD LENGTH=493	3e-65	44.1	GO:0006612 GO:0006833 GO:0006865 GO:0009651 GO:0009750 GO:0009963 GO:0010363 GO:0015800 GO:0015804 GO:0030003 GO:0070838	protein_targeting_to_membrane water_transport amino_acid_transport response_to_salt_stress response_to_fructose positive_regulation_of_flavonoid_biosynthetic_process regulation_of_plant-type_hypersensitive_response acidic_amino_acid_transport neutral_amino_acid_transport cellular_cation_homeostasis divalent_metal_ion_transport	GO:0015171	amino_acid_transmembrane_transporter_activity	1.97	0.127	0.628	0.432	0.786	0.611	0.115	-0.352	0.611	0.237	0.049	1	0.647	0.991	0.147	0.775	0.972	1	0.793	0.908
66	250300	TR30280|c1_g1_i5	Overlap	1438	AH021703	15	229781	232092	UniRef100_A0A0K9QFD5 Uncharacterized protein n=1 Tax=Spinacia oleracea RepID=A0A0K9QFD5_SPIOL	2e-114	55.46	UniRef100_A0A061EIE6 WRKY DNA-binding protein 70, putative isoform 1 n=1 Tax=Theobroma cacao RepID=A0A061EIE6_THECC	8e-44	Bv7_156860_hqwy.t1 cDNAEvidence=100	9e-97	57.96	AT3G56400.1 | Symbols: WRKY70, ATWRKY70 | WRKY DNA-binding protein 70 | chr3:20909082-20910409 REVERSE LENGTH=294	2e-28	52.75	GO:0000165 GO:0001666 GO:0002679 GO:0006355 GO:0006612 GO:0009409 GO:0009595 GO:0009617 GO:0009625 GO:0009627 GO:0009697 GO:0009751 GO:0009753 GO:0009759 GO:0009814 GO:0009862 GO:0009863 GO:0009864 GO:0009867 GO:0010120 GO:0010200 GO:0010310 GO:0010363 GO:0019684 GO:0031347 GO:0031348 GO:0035304 GO:0042742 GO:0043069 GO:0043900 GO:0045088 GO:0045892 GO:0050832 GO:0051707 GO:1900056	MAPK_cascade response_to_hypoxia respiratory_burst_involved_in_defense_response regulation_of_transcription,_DNA-templated protein_targeting_to_membrane response_to_cold detection_of_biotic_stimulus response_to_bacterium response_to_insect systemic_acquired_resistance salicylic_acid_biosynthetic_process response_to_salicylic_acid response_to_jasmonic_acid indole_glucosinolate_biosynthetic_process…	GO:0003700 GO:0005515	sequence-specific_DNA_binding_transcription_factor_activity protein_binding	3.25	-0.172	1.79	1.1	0.526	3.8	-0.655	1.05	1.35	2.06	0.103	1	0.289	0.785	0.691	0.042	0.845	0.897	0.568	0.039
66	250300	TR30280|c1_g1_i5	Resistant	1438	AH021703	15	229781	232092	UniRef100_A0A0K9QFD5 Uncharacterized protein n=1 Tax=Spinacia oleracea RepID=A0A0K9QFD5_SPIOL	2e-114	55.46	UniRef100_A0A061EIE6 WRKY DNA-binding protein 70, putative isoform 1 n=1 Tax=Theobroma cacao RepID=A0A061EIE6_THECC	8e-44	Bv7_156860_hqwy.t1 cDNAEvidence=100	9e-97	57.96	AT3G56400.1 | Symbols: WRKY70, ATWRKY70 | WRKY DNA-binding protein 70 | chr3:20909082-20910409 REVERSE LENGTH=294	2e-28	52.75	GO:0000165 GO:0001666 GO:0002679 GO:0006355 GO:0006612 GO:0009409 GO:0009595 GO:0009617 GO:0009625 GO:0009627 GO:0009697 GO:0009751 GO:0009753 GO:0009759 GO:0009814 GO:0009862 GO:0009863 GO:0009864 GO:0009867 GO:0010120 GO:0010200 GO:0010310 GO:0010363 GO:0019684 GO:0031347 GO:0031348 GO:0035304 GO:0042742 GO:0043069 GO:0043900 GO:0045088 GO:0045892 GO:0050832 GO:0051707 GO:1900056	MAPK_cascade response_to_hypoxia respiratory_burst_involved_in_defense_response regulation_of_transcription,_DNA-templated protein_targeting_to_membrane response_to_cold detection_of_biotic_stimulus response_to_bacterium response_to_insect systemic_acquired_resistance salicylic_acid_biosynthetic_process response_to_salicylic_acid response_to_jasmonic_acid indole_glucosinolate_biosynthetic_process…	GO:0003700 GO:0005515	sequence-specific_DNA_binding_transcription_factor_activity protein_binding	3.25	-0.172	1.79	1.1	0.526	3.8	-0.655	1.05	1.35	2.06	0.103	1	0.289	0.785	0.691	0.042	0.845	0.897	0.568	0.039
66	250300	TR87557|c0_g2_i4	Resistant	1253	AH021714	15	301843	303183	UniRef100_UPI00053FF7DE PREDICTED: trans-resveratrol di-O-methyltransferase-like n=1 Tax=Beta vulgaris subsp. vulgaris RepID=UPI00053FF7DE	2e-146	60.44	UniRef100_UPI00053FF7DE PREDICTED: trans-resveratrol di-O-methyltransferase-like n=1 Tax=Beta vulgaris subsp. vulgaris RepID=UPI00053FF7DE	2e-146	Bv4_095320_jstp.t1 cDNAEvidence=57.1	4e-143	59.07	AT4G35160.1 | Symbols: | O-methyltransferase family protein | chr4:16730989-16732808 REVERSE LENGTH=382	1e-53	33.88					-10.5	0.000785	-3.96	-3.41	-3.09	1.25	2.35	-0.673	0	-0.429	0.017	1	0.431	0.784	0.157	1	0.568	1	1	0.966
66	250300	TR30280|c1_g1_i5	Susceptible	1438	AH021703	15	229781	232092	UniRef100_A0A0K9QFD5 Uncharacterized protein n=1 Tax=Spinacia oleracea RepID=A0A0K9QFD5_SPIOL	2e-114	55.46	UniRef100_A0A061EIE6 WRKY DNA-binding protein 70, putative isoform 1 n=1 Tax=Theobroma cacao RepID=A0A061EIE6_THECC	8e-44	Bv7_156860_hqwy.t1 cDNAEvidence=100	9e-97	57.96	AT3G56400.1 | Symbols: WRKY70, ATWRKY70 | WRKY DNA-binding protein 70 | chr3:20909082-20910409 REVERSE LENGTH=294	2e-28	52.75	GO:0000165 GO:0001666 GO:0002679 GO:0006355 GO:0006612 GO:0009409 GO:0009595 GO:0009617 GO:0009625 GO:0009627 GO:0009697 GO:0009751 GO:0009753 GO:0009759 GO:0009814 GO:0009862 GO:0009863 GO:0009864 GO:0009867 GO:0010120 GO:0010200 GO:0010310 GO:0010363 GO:0019684 GO:0031347 GO:0031348 GO:0035304 GO:0042742 GO:0043069 GO:0043900 GO:0045088 GO:0045892 GO:0050832 GO:0051707 GO:1900056	MAPK_cascade response_to_hypoxia respiratory_burst_involved_in_defense_response regulation_of_transcription,_DNA-templated protein_targeting_to_membrane response_to_cold detection_of_biotic_stimulus response_to_bacterium response_to_insect systemic_acquired_resistance salicylic_acid_biosynthetic_process response_to_salicylic_acid response_to_jasmonic_acid indole_glucosinolate_biosynthetic_process…	GO:0003700 GO:0005515	sequence-specific_DNA_binding_transcription_factor_activity protein_binding	3.25	-0.172	1.79	1.1	0.526	3.8	-0.655	1.05	1.35	2.06	0.103	1	0.289	0.785	0.691	0.042	0.845	0.897	0.568	0.039
66	250300	TR67157|c1_g1_i4	Susceptible	1664	AH021707	15	260314	265806	UniRef100_A0A0J8BZ68 Uncharacterized protein n=1 Tax=Beta vulgaris subsp. vulgaris RepID=A0A0J8BZ68_BETVU	3e-142	73.82	UniRef100_UPI00051BFE37 PREDICTED: uncharacterized protein LOC104104961 isoform X2 n=1 Tax=Nicotiana tomentosiformis RepID=UPI00051BFE37	2e-84	Bv7_156910_iydz.t1 cDNAEvidence=100	1e-145	73.82	AT2G38550.1 | Symbols: | Transmembrane proteins 14C | chr2:16132178-16134229 FORWARD LENGTH=335	1e-67	50.6	GO:0008150	biological_process			-0.851	0.0865	-0.0728	-0.268	-0.596	0.618	1.29	0.0445	0.0797	-0.8	0.588	1	0.994	1	0.409	0.794	0.025	1	1	0.37
67	3151513	TR108415|c0_g1_i3	Overlap	1062	AH022029	15	3129296	3132711	UniRef100_A0A0K9RSR9 Auxin-responsive protein n=1 Tax=Spinacia oleracea RepID=A0A0K9RSR9_SPIOL	4e-94	68.78	UniRef100_A0A0K9RSR9 Auxin-responsive protein n=1 Tax=Spinacia oleracea RepID=A0A0K9RSR9_SPIOL	4e-94	Bv7_166630_ngxp.t1 cDNAEvidence=100	6e-95	80.11	AT2G33310.3 | Symbols: IAA13 | auxin-induced protein 13 | chr2:14114569-14115757 REVERSE LENGTH=246	3e-45	53.25	GO:0000394 GO:0009086 GO:0009733 GO:0010583	RNA_splicing,_via_endonucleolytic_cleavage_and_ligation methionine_biosynthetic_process response_to_auxin response_to_cyclopentenone	GO:0003700 GO:0005515	sequence-specific_DNA_binding_transcription_factor_activity protein_binding	-1.5	-0.219	-0.181	0.0145	-1.12	-0.913	0.243	0.0353	-0.0536	-1.14	0.091	1	0.954	1	0.008	0.513	0.893	1	1	0.007
67	3151513	TR4389|c0_g4_i1	Resistant	751	AH022036	15	3181548	3188027	UniRef100_A0A0J8BVU3 Uncharacterized protein n=1 Tax=Beta vulgaris subsp. vulgaris RepID=A0A0J8BVU3_BETVU	3e-154	91.16	UniRef100_UPI00052E732C PREDICTED: NADH dehydrogenase [ubiquinone] 1 alpha subcomplex subunit 9, mitochondrial n=1 Tax=Nelumbo nucifera RepID=UPI00052E732C	1e-148	Bv7_166550_odhm.t1 cDNAEvidence=100	1e-157	91.16	AT2G20360.1 | Symbols: | NAD(P)-binding Rossmann-fold superfamily protein | chr2:8786070-8789098 FORWARD LENGTH=402	5e-130	83.56	GO:0006511 GO:0009651 GO:0009853 GO:0051788 GO:0080129	ubiquitin-dependent_protein_catabolic_process response_to_salt_stress photorespiration response_to_misfolded_protein proteasome_core_complex_assembly			-0.992	-0.198	-0.0291	0.122	-0.887	-0.368	-0.134	0.0516	-0.165	-0.121	0.256	1	0.999	1	0.021	0.837	0.948	1	1	0.949
67	3151513	TR8119|c0_g1_i1	Susceptible	1138	AH022030	15	3141467	3147039	UniRef100_A0A0K9RF75 Uncharacterized protein n=1 Tax=Spinacia oleracea RepID=A0A0K9RF75_SPIOL	4e-99	78.31	UniRef100_UPI00057AFA26 PREDICTED: uncharacterized protein LOC105125640 n=1 Tax=Populus euphratica RepID=UPI00057AFA26	1e-78	Bv7_166640_jnqw.t1 cDNAEvidence=100	2e-99	78.31	AT2G20390.1 | Symbols: | unknown protein; Has 50 Blast hits to 50 proteins in 18 species: Archae - 0; Bacteria - 2; Metazoa - 0; Fungi - 0; Plants - 48; Viruses - 0; Other Eukaryotes - 0 (source: NCBI BLink). | chr2:8796475-8798142 REVERSE LENGTH=183	4e-56	59.03	GO:0008150	biological_process	GO:0003674	molecular_function	1.14	0.311	0.359	0.284	0.189	1.91	0.135	0.518	0.839	0.415	0.278	1	0.836	1	0.812	0.044	0.961	0.881	0.332	0.758
67	3151513	TR5984|c0_g1_i3	Susceptible	2228	AH022032	15	3153742	3155214	UniRef100_A0A0J8BX11 Uncharacterized protein n=1 Tax=Beta vulgaris subsp. vulgaris RepID=A0A0J8BX11_BETVU	5e-125	63.79	UniRef100_I1JP77 TPR transcription factor n=1 Tax=Glycine max RepID=I1JP77_SOYBN	6e-66	Bv7_166670_maiz.t1 cDNAEvidence=100	2e-128	63.79	AT4G17940.1 | Symbols: | Tetratricopeptide repeat (TPR)-like superfamily protein | chr4:9965787-9966778 FORWARD LENGTH=274	2e-29	53.4	GO:0008150	biological_process			0.982	0.911	-0.0539	-0.0437	0.168	-3.12	-0.711	-0.839	-0.158	-1.41	0.612	0.788	0.999	1	0.89	0.023	0.685	0.872	1	0.099
